# Supplementary material
Source: MDPI journal article supplement (https://www.mdpi.com/2220-9964/8/10/462)
Supplement: s1 [file s1]

Supporting Information for

**Spatial Prediction of Aftershocks Triggered by a Major Earthquake: a Binary Machine Learning Perspective**

Sadra Karimzadeh<sup>1\*</sup>, Masashi Matsuoka<sup>2</sup>, Jianming Kuang<sup>3</sup>, and Linlin Ge<sup>3</sup>

<sup>1</sup>Department of Remote Sensing and GIS, University of Tabriz, Tabriz 5166616471, Iran;  
sadra.karimzadeh@gmail.com; sa.karimzadeh@tabrizu.ac.ir

<sup>2</sup>Department of Architecture and Building Engineering, Tokyo Institute of Technology, Tokyo, Japan

matsuoka.m.ab@m.titech.ac.jp

<sup>3</sup>School of Civil and Environmental Engineering, The University of New South Wales (UNSW), Sydney, Australia

jianming.kuang@geos.org.au

linlin.ge@geos.org.au

**\*Corresponding Author**

Sadra Karimzadeh

E-mails: sadra.karimzadeh@gmail.com; sa.karimzadeh@tabrizu.ac.ir

## 20    **Introduction**

21    In the supplementary file, we provide supplementary information on interferometric synthetic  
22    aperture radar data (InSAR) and explanations of the aftershock parameters and machine learning  
23    (ML) methods.

24

25    *aftershocks\_predictions\_IJGI.xlsx* also contains the Coulomb failure pixel values, the slip  
26    distribution pixel values, the results of binary ML classifications (0 or 1) for different ML  
27    algorithms, and the locations of all the aftershocks used in this study.

28

## 29    **Contents of this File**

30    Figures S1 and Table S1.

31

# Supplementary Figure and Table:

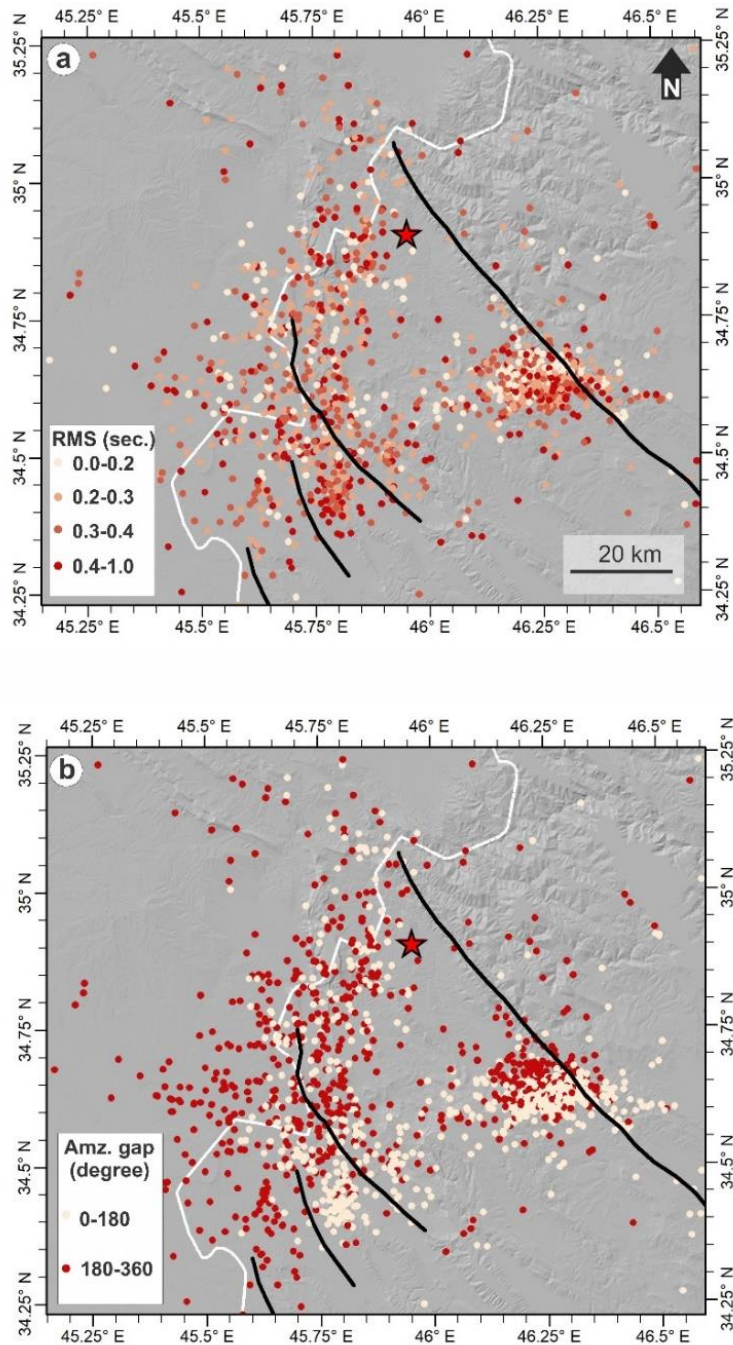

**Figure S1. (a)** The root-mean-square (RMS) of travel time residuals (in seconds) of the observed arrival time relative to the predicted arrival time for each location; **(b)** The azimuthal gap

between the events recorded by the Iranian Seismological Network (ISN). A larger azimuthal gap (red circles) indicates greater uncertainty in the location and depth of the aftershock records.

**Table S1.** Parameters of the SAR datasets used in this study.

| Sensor     | Orbit | Track | Mode | Master<br>(yyyy/mm/dd) | Slave<br>(yyyy/mm/dd) | Resolution<br>rg×az (m) | Coverage<br>(km) | Incidence<br>Angle (°) |
|------------|-------|-------|------|------------------------|-----------------------|-------------------------|------------------|------------------------|
| ALOS-2     | ASC   | 180   | WD   | 2016/08/09             | 2017/11/14            | 95×78                   | 350              | 40                     |
|            | DES   | 71    | WD   | 2017/10/04             | 2017/11/15            | 95×78                   | 350              | 40                     |
| Sentinel-1 | ASC   | 72    | IWS  | 2017/11/11             | 2017/11/17            | 5×20                    | 250              | 39                     |
|            | DES   | 79    | IWS  | 2017/11/12             | 2017/11/18            | 5×20                    | 250              | 39                     |
|            | DES   | 6     | IWS  | 2017/11/07             | 2017/11/19            | 5×20                    | 250              | 39                     |
