# Supplementary material
Source: MDPI journal article supplement (https://www.mdpi.com/2220-9964/8/10/462)
Supplement: s1 [file s1]

Archive with 3 entries (3 files):
- aftershock_raw.xlsx
- aftershocks_predictions_IJGI.xlsx
- Karimzadeh_supplementary_materials_IJGI.pdf
