# Supplementary material
Source: MDPI journal article supplement (https://www.mdpi.com/2220-9964/8/10/462)
Supplement: s1 [file s1 › aftershock_raw.xlsx]

## Sheet: Sheet1
No.	Event ID	Origin Time	Lat.	Long.	Depth(km)	Mag.	Mag. Type	RMS(sec)	Azimuthal Gap (deg)
1	125724	2017/11/12 17:35:36.1	34.857	45.844	12	4.4	MN	0.4	181
2	125729	2017/11/12 18:18:16.2	34.772	45.762	18.1	7.3	MN	0.4	82
3	125730	2017/11/12 18:29:54.4	34.826	45.732	10.6	4.5	MN	0.3	226
4	125731	2017/11/12 18:34:54.8	34.671	45.876	15.9	4.1	MN	0.4	224
5	125734	2017/11/12 18:48:55.9	34.604	45.832	18	3.5	MN	0.1	236
6	134223	2017/11/12 18:52:12.2	34.512	45.885	6	3.7	MN	0.4	228
7	125735	2017/11/12 19:06:36.4	34.581	45.855	7.1	3.7	MN	0.2	236
8	125736	2017/11/12 19:10:30.6	34.374	46.064	7.3	3.5	MN	0.4	226
9	125739	2017/11/12 19:20:15.7	35.047	45.992	18.1	3.3	MN	0.4	194
10	125738	2017/11/12 19:25:42.4	34.976	45.854	8	3.7	MN	0.2	209
11	125740	2017/11/12 19:28:18.3	34.551	46.256	8	3.5	MN	0.4	209
12	125741	2017/11/12 19:42:17.8	34.545	45.826	12.9	3.4	MN	0.3	229
13	125742	2017/11/12 19:54:10.6	34.723	45.709	16.8	4.1	MN	0.4	230
14	125743	2017/11/12 20:01:48.5	34.563	45.746	6.9	3.6	MN	0.4	239
15	125744	2017/11/12 20:03:52.3	34.727	46.345	11.4	3.1	MN	0.6	179
16	125745	2017/11/12 20:13:12.1	33.831	46.023	12	3.6	MN	0.5	206
17	125747	2017/11/12 20:22:58.7	34.603	46.291	8.5	3	MN	0.4	197
18	125748	2017/11/12 20:24:50.2	34.655	46.37	7.5	3	MN	0.3	193
19	125750	2017/11/12 20:28:04.0	34.626	45.291	11.1	3.4	MN	0.2	222
20	125749	2017/11/12 20:32:19.4	34.651	45.972	18.3	3.6	MN	0.3	229
No.	Event ID	Origin Time	Lat.	Long.	Depth(km)	Mag.	Mag. Type	RMS(sec)	Azimuthal Gap (deg)
21	125751	2017/11/12 20:42:45.7	34.558	45.97	7.4	4	MN	0.2	178
22	125752	2017/11/12 20:44:04.8	34.508	45.468	13.7	3.9	MN	0.3	215
23	125754	2017/11/12 20:51:37.0	34.391	46.437	10	2.9	MN	0.4	232
24	125755	2017/11/12 20:59:39.3	34.84	45.854	8	3	MN	0.5	181
25	125756	2017/11/12 21:01:33.4	34.028	46.15	14.3	3.3	MN	0.4	173
26	125757	2017/11/12 21:05:46.1	35.079	45.854	6	3.4	MN	0.4	176
27	125758	2017/11/12 21:16:17.9	34.621	45.77	24	4.1	MN	0.4	198
28	125760	2017/11/12 21:23:07.7	34.73	45.799	8	3	MN	0.2	187
29	125761	2017/11/12 21:33:21.8	34.588	45.782	11.3	4.5	MN	0.4	158
30	125764	2017/11/12 21:40:56.5	34.696	45.648	8	3.1	MN	0.4	199
31	125763	2017/11/12 21:42:37.3	34.609	45.816	10.9	3.2	MN	0.2	188
32	125765	2017/11/12 21:57:32.9	34.806	45.818	7.4	3	MN	0.2	184
33	125766	2017/11/12 22:02:17.3	34.198	45.986	19.1	2.8	MN	0.3	231
34	125768	2017/11/12 22:09:12.1	34.95	45.903	6	3.4	MN	0.5	175
35	125769	2017/11/12 22:11:33.8	35.072	45.858	7.9	4	MN	0.3	143
36	125770	2017/11/12 22:12:19.9	34.936	45.771	12	4.1	MN	0.4	185
37	125771	2017/11/12 22:13:56.3	34.816	45.83	9.1	3.4	MN	0.3	183
38	125775	2017/11/12 22:25:34.4	34.895	45.873	7.7	3.2	MN	0.3	178
39	125772	2017/11/12 22:31:00.8	34.611	45.659	11.2	4.5	MN	0.4	164
40	125776	2017/11/12 22:38:36.6	34.525	45.859	9	3.2	MN	0.4	228
No.	Event ID	Origin Time	Lat.	Long.	Depth(km)	Mag.	Mag. Type	RMS(sec)	Azimuthal Gap (deg)
41	125777	2017/11/12 22:40:04.6	34.868	45.759	15	3.3	MN	0.2	187
42	125778	2017/11/12 22:43:24.0	35.06	45.842	10	2.8	MN	0.5	177
43	125779	2017/11/12 22:51:10.1	34.46	45.568	8	2.5	MN	0.4	281
44	125780	2017/11/12 22:52:45.5	34.874	45.739	11.8	3	MN	0.3	188
45	125781	2017/11/12 22:53:57.1	34.711	45.792	11.2	3.3	MN	0.1	188
46	125782	2017/11/12 22:59:07.0	34.861	45.764	10	2.6	MN	0.5	318
47	125783	2017/11/12 23:01:41.0	34.758	45.717	9.4	2.5	MN	0.4	320
48	125784	2017/11/12 23:08:17.3	34.844	45.869	15.2	2.5	MN	0.5	227
49	125785	2017/11/12 23:13:49.3	34.945	45.846	10	2.5	MN	0.4	284
50	125788	2017/11/12 23:20:13.2	34.765	45.768	8.7	2.7	MN	0.5	226
51	125790	2017/11/12 23:29:15.8	34.932	45.771	9.8	2.7	MN	0.5	185
52	125791	2017/11/12 23:31:50.5	34.772	45.801	7.5	3	MN	0.3	185
53	125787	2017/11/12 23:37:22.1	34.623	46.102	6	4.1	MN	0.3	140
54	125792	2017/11/12 23:50:16.1	34.675	45.764	9.3	2.7	MN	0.4	228
55	125794	2017/11/12 23:52:34.8	34.587	45.974	7.6	2.8	MN	0.5	230
56	125796	2017/11/12 23:54:58.9	35.103	45.81	8	2.7	MN	0.5	205
57	125799	2017/11/13 00:09:49.1	34.636	45.591	16.9	3.7	MN	0.7	204
58	125828	2017/11/13 00:16:57.3	34.466	45.729	5	2.8	MN	0	252
59	125798	2017/11/13 00:20:51.8	34.613	45.765	9.4	4.6	MN	0.5	146
60	125801	2017/11/13 00:27:24.2	35.288	46.219	16.9	2.8	MN	0.5	158
No.	Event ID	Origin Time	Lat.	Long.	Depth(km)	Mag.	Mag. Type	RMS(sec)	Azimuthal Gap (deg)
61	125803	2017/11/13 00:36:29.0	34.758	45.85	11.1	2.5	MN	0.4	232
62	125802	2017/11/13 00:38:10.1	35.012	45.742	8	3.5	MN	0.3	185
63	125804	2017/11/13 00:49:58.4	34.58	45.55	5	2.9	MN	0.4	252
64	125806	2017/11/13 01:02:44.6	34.703	45.86	8	3	MN	0.5	226
65	125807	2017/11/13 01:09:17.3	34.724	45.648	18	2.5	MN	0.3	238
66	125808	2017/11/13 01:10:28.3	34.836	45.64	9	3.4	MN	0.2	196
67	125809	2017/11/13 01:16:44.1	34.998	45.873	8	3.2	MN	0.2	206
68	125812	2017/11/13 01:28:35.4	34.574	45.698	7.5	3.2	MN	0.6	204
69	125813	2017/11/13 01:29:57.9	34.42	45.74	9.3	3.4	MN	0.6	199
70	125814	2017/11/13 01:31:53.0	34.399	46.086	10	2.5	MN	0.4	244
71	125815	2017/11/13 01:34:10.1	34.339	45.618	8	3	MN	0.4	212
72	125816	2017/11/13 01:38:22.2	34.577	45.8	10	2.5	MN	0.2	240
73	125817	2017/11/13 01:40:30.5	34.433	45.638	10	2.8	MN	0.3	327
74	125818	2017/11/13 01:42:55.7	34.644	45.692	10	2.8	MN	0.1	322
75	125819	2017/11/13 01:45:37.2	34.835	45.659	10	2.5	MN	0.3	230
76	125820	2017/11/13 01:51:20.3	35.105	45.971	7.9	3.1	MN	0.5	167
77	125821	2017/11/13 01:52:56.9	34.399	45.648	10	2.8	MN	0.2	260
78	125823	2017/11/13 02:00:56.5	34.764	45.633	10	2.8	MN	0.4	236
79	125822	2017/11/13 02:02:11.8	34.384	45.634	10	2.8	MN	0.3	261
80	125824	2017/11/13 02:09:13.5	34.802	45.576	10	2.7	MN	0.4	324
No.	Event ID	Origin Time	Lat.	Long.	Depth(km)	Mag.	Mag. Type	RMS(sec)	Azimuthal Gap (deg)
81	125825	2017/11/13 02:19:31.3	34.606	45.624	10.6	3.4	MN	0.2	202
82	125826	2017/11/13 02:24:17.9	34.655	45.805	10	2.8	MN	0.3	233
83	125827	2017/11/13 02:29:08.9	34.471	45.63	10	2.6	MN	0.2	206
84	125829	2017/11/13 02:37:55.6	34.487	45.757	10	2.7	MN	0.4	196
85	125830	2017/11/13 02:38:31.6	34.647	45.701	8	3	MN	0.3	196
86	125831	2017/11/13 02:44:09.8	34.421	45.783	6.7	3.3	MN	0.2	196
87	125832	2017/11/13 02:51:34.0	34.594	45.507	10	2.8	MN	0.5	253
88	125833	2017/11/13 02:57:10.3	34.654	46.095	8	3	MN	0.2	167
89	125834	2017/11/13 02:58:15.1	35.089	46.226	10	2.7	MN	0.4	170
90	125835	2017/11/13 03:05:17.9	35.016	46.599	7.2	3.6	MN	0.4	129
91	125836	2017/11/13 03:14:37.0	34.972	45.863	8	4	MN	0.3	133
92	125838	2017/11/13 03:38:21.6	34.519	45.972	9	3	MN	0.5	178
93	125841	2017/11/13 03:52:09.4	34.695	45.856	7.9	3.3	MN	0.3	183
94	125844	2017/11/13 04:02:05.5	34.592	46.056	9	2.9	MN	0.4	301
95	125845	2017/11/13 04:07:40.3	34.537	45.919	8	2.7	MN	0.4	261
96	125848	2017/11/13 04:21:15.7	34.523	45.756	8	2.6	MN	0.3	271
97	125847	2017/11/13 04:25:56.3	33.576	46.304	12.6	3.6	MN	0.4	183
98	125846	2017/11/13 04:27:56.6	34.454	45.851	7.5	4.8	MN	0.7	151
99	134620	2017/11/13 04:36:12.7	34.435	45.795	7.9	4.3	MN	0.4	149
100	125850	2017/11/13 04:41:42.5	35.021	45.877	8	3.8	MN	0.5	175
No.	Event ID	Origin Time	Lat.	Long.	Depth(km)	Mag.	Mag. Type	RMS(sec)	Azimuthal Gap (deg)
101	125851	2017/11/13 04:48:20.0	34.558	45.867	10	2.8	MN	0.2	235
102	134266	2017/11/13 04:54:56.1	34.611	45.766	9.4	3.6	MN	0.3	193
103	125854	2017/11/13 05:04:23.0	34.528	45.753	8	4.2	MN	0.6	149
104	125855	2017/11/13 05:13:59.0	34.457	45.764	7	2.9	MN	0.4	293
105	125856	2017/11/13 05:36:38.6	34.607	45.81	11.2	3.5	MN	0.1	189
106	125858	2017/11/13 05:41:27.8	34.524	46.349	8	2.5	MN	0.6	224
107	125860	2017/11/13 05:52:55.2	34.525	45.699	8	3.7	MN	0.2	199
108	125862	2017/11/13 06:05:35.2	35.024	45.763	8	3.2	MN	0.3	193
109	125863	2017/11/13 06:29:15.6	34.945	45.782	8.9	3.4	MN	0.4	184
110	125864	2017/11/13 06:32:55.5	34.013	46.139	10	2.5	MN	0.5	205
111	125865	2017/11/13 06:33:56.4	33.567	45.941	8	3.1	MN	0.3	287
112	125866	2017/11/13 06:48:59.8	34.846	45.624	10	2.9	MN	0.5	204
113	125868	2017/11/13 06:53:52.1	34.522	45.692	10	2.6	MN	0.2	275
114	125869	2017/11/13 07:07:07.7	33.603	45.93	11.4	3.2	MN	0.4	287
115	125870	2017/11/13 07:09:44.9	33.607	45.89	12	2.5	MN	0.5	302
116	125871	2017/11/13 07:13:00.1	34.912	45.73	8	2.9	MN	0.2	286
117	125874	2017/11/13 07:20:49.0	35.327	45.318	8.1	3.3	MN	0.4	213
118	125875	2017/11/13 07:27:08.8	35.317	45.286	8.1	3.1	MN	0.5	210
119	125876	2017/11/13 07:37:47.4	33.516	45.762	10	2.5	MN	0.4	306
120	125878	2017/11/13 07:58:55.9	34.854	45.786	8	3.3	MN	0.5	185
No.	Event ID	Origin Time	Lat.	Long.	Depth(km)	Mag.	Mag. Type	RMS(sec)	Azimuthal Gap (deg)
121	125877	2017/11/13 08:01:11.7	34.719	45.929	10	2.5	MN	0.4	269
122	125879	2017/11/13 08:08:29.9	34.738	47.131	6	3.9	MN	0.5	55
123	125882	2017/11/13 08:24:17.6	34.601	45.982	8	2.6	MN	0.4	264
124	125883	2017/11/13 08:28:51.1	34.547	45.576	9.4	4.4	MN	0.5	162
125	125884	2017/11/13 08:49:59.8	34.571	46.17	8	2.7	MN	0.4	328
126	125885	2017/11/13 09:14:55.5	34.767	45.794	8.1	3.7	MN	0.4	187
127	125886	2017/11/13 09:19:29.0	34.438	45.77	8.3	4.7	MN	0.7	150
128	125889	2017/11/13 09:41:54.4	34.41	45.656	8	2.8	MN	0.5	274
129	125890	2017/11/13 09:49:27.5	34.707	45.745	10	2.6	MN	0.5	278
130	125892	2017/11/13 10:05:36.7	34.841	45.695	9.9	2.5	MN	0.1	284
131	125894	2017/11/13 10:22:30.1	34.801	45.745	9.1	3.2	MN	0.3	189
132	125898	2017/11/13 10:43:53.0	34.081	46.245	6	4.3	MN	0.5	129
133	125901	2017/11/13 11:08:26.4	34.446	45.824	8	3.7	MN	0.3	192
134	125908	2017/11/13 12:06:14.6	34.579	45.527	10	2.6	MN	0.2	334
135	125915	2017/11/13 12:39:06.9	34.656	45.798	13.7	3.2	MN	0.2	188
136	125919	2017/11/13 13:02:35.8	34.687	46.147	8	3.1	MN	0.4	173
137	125920	2017/11/13 13:12:37.6	34.482	45.767	11.6	4.5	MN	0.6	154
138	125921	2017/11/13 13:19:18.0	34.895	45.843	18.1	3.1	MN	0.4	180
139	125924	2017/11/13 13:38:14.9	34.864	45.76	13.1	3	MN	0.5	187
140	125925	2017/11/13 13:40:01.5	35.275	45.271	8	3.6	MN	0.3	216
No.	Event ID	Origin Time	Lat.	Long.	Depth(km)	Mag.	Mag. Type	RMS(sec)	Azimuthal Gap (deg)
141	125928	2017/11/13 13:56:41.4	34.614	46.178	12	3.1	MN	0.6	161
142	125927	2017/11/13 14:01:48.3	34.826	45.816	11	3.8	MN	0.2	184
143	125929	2017/11/13 14:22:08.7	34.568	45.83	12	2.6	MN	0.5	318
144	125930	2017/11/13 14:37:59.2	34.723	45.548	8	2.9	MN	0.1	325
145	125931	2017/11/13 14:46:06.1	34.857	45.823	11.5	3	MN	0.7	183
146	125932	2017/11/13 14:54:22.2	34.654	46.607	9.4	2.6	MN	0.2	124
147	125933	2017/11/13 15:00:43.6	34.378	45.576	8	4.4	MN	0.4	163
148	125937	2017/11/13 15:11:14.1	34.408	45.563	9.3	3.8	MN	0.4	213
149	125940	2017/11/13 15:36:48.3	34.525	45.776	8.8	3.8	MN	0.6	194
150	125944	2017/11/13 16:24:15.7	34.517	45.917	10	2.7	MN	0.5	304
151	125947	2017/11/13 16:41:40.0	34.359	45.828	10	2.8	MN	0.5	319
152	125952	2017/11/13 17:27:57.1	35.19	45.773	8	3	MN	0.4	179
153	125953	2017/11/13 17:44:59.3	34.448	45.817	8	3.1	MN	0.4	193
154	125955	2017/11/13 18:09:33.1	34.599	45.767	7.8	3.3	MN	0.3	193
155	125959	2017/11/13 19:17:52.7	34.602	46.472	10	2.8	MN	0.3	131
156	125960	2017/11/13 19:18:43.0	34.603	46.461	10	2.8	MN	0.4	166
157	125965	2017/11/13 20:00:29.0	34.759	45.618	8.1	3.8	MN	0.2	200
158	125968	2017/11/13 20:20:00.2	34.791	45.613	9	3.1	MN	0.2	205
159	125969	2017/11/13 20:23:33.4	34.764	45.642	13	3.4	MN	0.3	198
160	125971	2017/11/13 20:30:17.5	34.777	45.618	10.7	3.1	MN	0.5	199
No.	Event ID	Origin Time	Lat.	Long.	Depth(km)	Mag.	Mag. Type	RMS(sec)	Azimuthal Gap (deg)
161	125972	2017/11/13 20:39:07.6	34.621	46.316	7.1	3.2	MN	0.4	151
162	125981	2017/11/13 20:45:46.3	34.573	45.799	10	2.5	MN	0.4	319
163	125973	2017/11/13 20:51:42.3	34.608	45.743	8	3.8	MN	0.4	194
164	125974	2017/11/13 20:56:29.7	34.639	45.653	8.9	4.1	MN	0.5	196
165	125975	2017/11/13 21:33:05.5	34.368	46.566	12	2.5	MN	0.4	134
166	125977	2017/11/13 21:54:18.4	34.579	46.408	8.3	2.7	MN	0.3	162
167	125978	2017/11/13 21:59:27.9	34.447	45.825	6	3.1	MN	0.3	192
168	125984	2017/11/13 22:35:16.8	34.647	46.136	8.1	3.2	MN	0.3	164
169	125987	2017/11/13 22:50:34.3	34.618	45.694	9.4	3	MN	0.3	233
170	125989	2017/11/13 23:29:46.2	34.998	45.858	10	2.9	MN	0.3	217
171	125995	2017/11/14 00:06:35.7	34.574	45.762	8	4	MN	0.5	191
172	125997	2017/11/14 00:32:42.3	34.607	46.339	5.1	2.7	MN	0.4	273
173	126000	2017/11/14 01:08:45.1	34.473	45.931	6	4.1	MN	0.4	183
174	126005	2017/11/14 01:45:47.1	34.494	45.806	8	4.1	MN	0.4	160
175	126012	2017/11/14 03:10:16.0	34.621	45.716	9.1	3.2	MN	0.5	195
176	126014	2017/11/14 03:31:07.9	34.845	45.877	12	2.8	MN	0.4	295
177	126015	2017/11/14 03:38:14.8	34.963	45.889	11.8	3.1	MN	0.3	176
178	126017	2017/11/14 03:41:09.8	34.554	45.963	8	2.5	MN	0.5	259
179	126018	2017/11/14 03:49:23.5	34.448	45.782	10	2.6	MN	0.4	266
180	126019	2017/11/14 03:57:11.5	34.689	46.233	8	2.8	MN	0.6	167
No.	Event ID	Origin Time	Lat.	Long.	Depth(km)	Mag.	Mag. Type	RMS(sec)	Azimuthal Gap (deg)
181	126024	2017/11/14 04:18:19.7	34.666	46.302	9	2.5	MN	0.4	278
182	126022	2017/11/14 04:47:57.8	34.429	45.784	8	3.4	MN	0.5	196
183	126023	2017/11/14 05:03:04.2	34.619	45.76	11.3	3.4	MN	0.4	193
184	126031	2017/11/14 05:53:46.0	34.769	46.163	7.2	2.7	MN	0.3	259
185	126042	2017/11/14 07:09:58.7	34.756	46.171	9	2.9	MN	0.3	258
186	126045	2017/11/14 07:35:46.0	34.597	45.789	8	4	MN	0.5	190
187	126047	2017/11/14 08:19:31.9	34.503	45.718	8	3.4	MN	0.5	198
188	126048	2017/11/14 08:46:15.0	34.405	45.795	6	3.8	MN	0.4	196
189	126057	2017/11/14 09:31:41.5	34.71	46.198	10	2.5	MN	0.2	251
190	126060	2017/11/14 09:47:03.4	34.731	45.759	10	2.5	MN	0.4	278
191	126065	2017/11/14 10:07:41.2	34.679	46.237	10	2.5	MN	0.5	286
192	126063	2017/11/14 10:11:14.3	34.696	46.265	8.7	3.6	MN	0.3	165
193	126068	2017/11/14 10:15:45.0	34.731	46.19	11.4	3.1	MN	0.2	159
194	126066	2017/11/14 10:37:58.1	34.772	45.734	8	3	MN	0.4	203
195	126073	2017/11/14 11:20:35.9	34.675	46.236	10	2.5	MN	0.4	258
196	126075	2017/11/14 12:06:19.0	34.509	45.825	10	2.5	MN	0.7	306
197	126077	2017/11/14 12:35:58.5	34.592	45.801	14.7	3.1	MN	0.3	190
198	126078	2017/11/14 12:44:29.4	34.454	45.792	6	3.1	MN	0.5	195
199	126087	2017/11/14 15:01:46.8	35.172	45.635	8	2.8	MN	0.6	319
200	126086	2017/11/14 15:09:24.7	34.48	45.801	10	2.5	MN	0.4	267
No.	Event ID	Origin Time	Lat.	Long.	Depth(km)	Mag.	Mag. Type	RMS(sec)	Azimuthal Gap (deg)
201	126085	2017/11/14 15:16:03.8	34.57	45.688	9.1	4.2	MN	0.4	164
202	126092	2017/11/14 15:32:53.5	35.074	45.826	10	2.9	MN	0.1	329
203	126097	2017/11/14 15:51:03.1	34.513	45.673	6	2.8	MN	0.3	279
204	126095	2017/11/14 16:03:25.8	34.579	45.638	10	2.9	MN	0.3	335
205	126098	2017/11/14 16:12:47.0	34.636	45.59	9	3.8	MN	0.3	204
206	126099	2017/11/14 16:32:42.6	34.525	45.704	10	2.9	MN	0.5	276
207	126101	2017/11/14 16:47:37.7	34.629	46.339	8	2.8	MN	0.6	204
208	126103	2017/11/14 17:23:14.6	34.673	45.545	9.1	3.3	MN	0.3	206
209	126104	2017/11/14 17:27:05.4	34.671	45.523	7.5	3.3	MN	0.4	208
210	126105	2017/11/14 17:45:09.6	34.539	45.613	10	2.5	MN	0.6	285
211	126106	2017/11/14 17:47:47.6	34.735	45.687	11.2	3	MN	0.5	194
212	126108	2017/11/14 18:11:46.9	34.254	45.455	10	2.8	MN	0.7	285
213	126113	2017/11/14 19:22:30.3	34.487	45.84	8	2.6	MN	0.1	265
214	126115	2017/11/14 19:56:14.5	34.554	45.749	6.9	3.2	MN	0.4	194
215	126121	2017/11/14 20:37:20.8	34.115	46.178	9.1	3.1	MN	0.4	199
216	126123	2017/11/14 20:54:48.1	34.645	45.728	10	2.9	MN	0.4	276
217	126124	2017/11/14 21:05:25.4	34.714	46.263	10	2.8	MN	0.3	313
218	126137	2017/11/14 21:13:40.6	34.664	46.124	7.9	3	MN	0.4	165
219	126125	2017/11/14 21:41:11.3	34.081	46.261	6	3.5	MN	0.5	157
220	126134	2017/11/14 22:27:01.6	34.785	46.147	12	2.5	MN	0.2	320
No.	Event ID	Origin Time	Lat.	Long.	Depth(km)	Mag.	Mag. Type	RMS(sec)	Azimuthal Gap (deg)
221	126133	2017/11/14 22:33:37.9	35.049	45.923	10	2.6	MN	0.1	315
222	126130	2017/11/14 22:55:19.1	34.804	45.802	10	2.9	MN	0.5	185
223	126129	2017/11/14 23:04:33.9	34.65	45.781	9.2	3.1	MN	0.3	189
224	126136	2017/11/14 23:32:39.1	34.753	45.656	10	2.9	MN	0.2	322
225	126140	2017/11/15 00:21:30.1	34.52	45.733	10	2.9	MN	0.6	309
226	126143	2017/11/15 00:44:17.7	34.532	45.779	6	3.6	MN	0.3	194
227	126144	2017/11/15 00:56:35.6	34.8	45.814	8	3.1	MN	0.3	185
228	126147	2017/11/15 01:21:26.8	34.736	45.67	10	2.8	MN	0.3	330
229	126148	2017/11/15 01:23:47.6	34.921	45.873	6	2.8	MN	0.4	178
230	126150	2017/11/15 01:34:17.2	34.995	45.936	6	3	MN	0.3	183
231	126158	2017/11/15 03:58:32.9	34.526	45.902	6.4	3.2	MN	0.4	197
232	126163	2017/11/15 05:37:59.7	34.684	45.659	10	2.6	MN	0.2	322
233	126164	2017/11/15 05:39:52.8	34.784	45.786	10	2.5	MN	0.3	279
234	126173	2017/11/15 07:11:20.0	34.539	45.845	8.8	4	MN	0.4	188
235	126176	2017/11/15 07:39:59.3	34.649	45.744	10	2.7	MN	0.3	276
236	126177	2017/11/15 07:43:10.5	34.873	45.969	24	2.6	MN	0.2	276
237	126178	2017/11/15 07:46:02.4	34.508	45.746	8	2.5	MN	0.5	274
238	126182	2017/11/15 08:06:04.7	34.63	45.76	8.9	2.9	MN	0.5	282
239	126184	2017/11/15 08:08:51.0	34.815	45.705	8	2.6	MN	0.4	299
240	126185	2017/11/15 08:29:50.6	34.566	45.673	8	2.7	MN	0.5	282
No.	Event ID	Origin Time	Lat.	Long.	Depth(km)	Mag.	Mag. Type	RMS(sec)	Azimuthal Gap (deg)
241	126188	2017/11/15 08:52:03.2	34.541	45.825	7.6	2.7	MN	0.3	270
242	126186	2017/11/15 08:59:36.4	34.67	46.043	7.1	3.9	MN	0.3	171
243	126191	2017/11/15 09:20:00.6	34.528	45.749	8	3	MN	0.4	195
244	126193	2017/11/15 09:57:04.6	34.477	45.726	10	2.7	MN	0.3	273
245	126204	2017/11/15 11:44:44.3	34.578	45.771	8	3.5	MN	0.5	193
246	126206	2017/11/15 12:00:32.6	34.696	45.829	10	2.8	MN	0.4	285
247	126209	2017/11/15 12:07:21.4	34.952	45.802	16.5	2.8	MN	0.4	192
248	126213	2017/11/15 12:54:17.4	34.626	45.818	8.9	2.9	MN	0.4	196
249	126219	2017/11/15 13:09:29.0	34.496	45.69	7.9	2.5	MN	0.5	276
250	126221	2017/11/15 13:15:27.2	35.209	46.882	10	2.5	MN	0.2	273
251	126222	2017/11/15 13:17:52.0	34.488	45.741	1.1	2.5	MN	0.3	272
252	126226	2017/11/15 13:50:59.7	34.101	45.339	11.6	2.6	MN	0.4	292
253	126227	2017/11/15 13:56:10.3	34.56	46.4	10	2.5	MN	0.4	166
254	126230	2017/11/15 14:14:17.1	34.76	47.16	10.1	2.6	MN	0.5	182
255	126243	2017/11/15 15:14:48.0	34.384	46.08	26.3	2.7	MN	0.2	181
256	126242	2017/11/15 15:20:36.6	34.597	45.578	10.8	4.2	MN	0.4	200
257	126247	2017/11/15 15:48:37.7	34.791	47.217	10.6	2.5	MN	0.3	147
258	126249	2017/11/15 15:57:35.9	34.722	46.507	10	2.5	MN	0.4	165
259	126252	2017/11/15 16:13:23.8	34.647	45.793	10	2.6	MN	0.4	273
260	126255	2017/11/15 16:35:11.0	33.917	45.757	10	2.7	MN	0.3	266
No.	Event ID	Origin Time	Lat.	Long.	Depth(km)	Mag.	Mag. Type	RMS(sec)	Azimuthal Gap (deg)
261	126259	2017/11/15 17:11:05.6	34.595	45.776	8.1	3	MN	0.3	191
262	126263	2017/11/15 17:39:04.5	34.745	45.82	10	2.5	MN	0.4	275
263	126268	2017/11/15 18:14:46.2	34.568	46.415	11.6	2.6	MN	0.2	160
264	126269	2017/11/15 18:16:04.6	34.561	46.426	10	2.7	MN	0.2	156
265	126273	2017/11/15 18:48:10.5	34.566	46.413	11.8	2.8	MN	0.2	161
266	126274	2017/11/15 18:50:37.3	34.567	46.434	10	2.6	MN	0.2	153
267	126275	2017/11/15 19:01:24.4	33.575	46.315	10	2.6	MN	0.4	240
268	126276	2017/11/15 19:03:07.3	34.65	46.053	8.6	3.1	MN	0.3	170
269	126277	2017/11/15 19:04:53.8	34.644	46.041	10	2.8	MN	0.1	258
270	126278	2017/11/15 19:08:06.0	34.557	45.834	10	2.5	MN	0.4	267
271	126280	2017/11/15 19:26:27.1	34.51	45.909	5.5	3.4	MN	0.3	184
272	126282	2017/11/15 19:44:05.4	34.445	45.816	8	3.5	MN	0.4	192
273	126284	2017/11/15 19:47:43.4	34.6	46.075	8	3.6	MN	0.3	169
274	126285	2017/11/15 19:54:28.8	34.563	45.829	9.2	3	MN	0.2	189
275	126287	2017/11/15 20:09:38.0	34.448	45.786	8	3.4	MN	0.4	195
276	126288	2017/11/15 20:15:11.8	34.492	45.846	8.4	3.2	MN	0.4	189
277	126291	2017/11/15 20:43:19.0	34.576	45.728	9.4	3.2	MN	0.3	196
278	126299	2017/11/15 21:15:45.6	34.552	45.799	7.5	3	MN	0.4	191
279	126300	2017/11/15 21:21:31.0	34.818	45.946	14.6	2.9	MN	0.2	174
280	126304	2017/11/15 21:33:14.6	34.655	45.618	8	2.5	MN	0.4	282
No.	Event ID	Origin Time	Lat.	Long.	Depth(km)	Mag.	Mag. Type	RMS(sec)	Azimuthal Gap (deg)
281	126322	2017/11/15 23:34:18.0	34.342	46.024	8	2.5	MN	0.5	232
282	126325	2017/11/15 23:50:11.9	34.393	45.667	11.6	3.2	MN	0.2	206
283	126331	2017/11/16 00:09:16.5	34.416	46.195	10	2.6	MN	0.5	237
284	126332	2017/11/16 00:16:14.9	34.404	45.586	8	3.8	MN	0.3	206
285	126336	2017/11/16 00:38:01.3	34.413	45.606	8	3.3	MN	0.4	205
286	126341	2017/11/16 01:03:32.0	34.621	46.381	6	3.3	MN	0.4	147
287	126342	2017/11/16 01:09:18.1	34.587	45.549	8	3.8	MN	0.5	202
288	126343	2017/11/16 01:27:40.7	34.604	46.354	8.4	3.4	MN	0.3	149
289	126365	2017/11/16 03:04:59.9	35.05	46.838	10	2.8	MN	0.5	169
290	126371	2017/11/16 03:30:24.7	34.719	45.794	8.4	2.7	MN	0.2	290
291	126372	2017/11/16 03:39:10.1	34.839	46.246	10	2.5	MN	0.4	300
292	126374	2017/11/16 03:55:59.2	34.611	45.905	21.9	3.5	MN	0.2	182
293	126375	2017/11/16 04:01:43.4	34.668	46.24	10	2.6	MN	0.1	294
294	126376	2017/11/16 04:14:37.6	34.592	46.197	8	2.5	MN	0.3	237
295	126377	2017/11/16 04:32:14.4	34.627	46.393	10	2.5	MN	0.2	167
296	126378	2017/11/16 04:33:19.2	34.643	46.293	10.7	3	MN	0.2	230
297	126380	2017/11/16 04:59:13.4	34.696	46.357	8	2.6	MN	0.4	286
298	126383	2017/11/16 05:30:22.7	34.768	46.14	10	2.7	MN	0.4	327
299	126387	2017/11/16 06:16:53.5	34.634	46.42	9.2	3.2	MN	0.3	148
300	126388	2017/11/16 06:29:02.8	34.776	45.699	8.6	2.7	MN	0.3	297
No.	Event ID	Origin Time	Lat.	Long.	Depth(km)	Mag.	Mag. Type	RMS(sec)	Azimuthal Gap (deg)
301	126389	2017/11/16 07:10:36.5	34.603	46.123	8.1	3.5	MN	0.5	166
302	126391	2017/11/16 07:49:29.8	34.595	45.795	7	3.2	MN	0.3	191
303	126393	2017/11/16 08:17:15.4	34.605	46.276	8	2.7	MN	0.4	221
304	126399	2017/11/16 08:55:42.7	34.604	45.622	10.8	2.7	MN	0.1	288
305	126400	2017/11/16 09:03:40.4	34.658	46.157	8	2.8	MN	0.2	250
306	126403	2017/11/16 09:56:02.6	34.574	46.43	10	2.9	MN	0.2	189
307	126405	2017/11/16 10:11:58.4	35.126	45.888	10	2.7	MN	0.2	326
308	126404	2017/11/16 10:15:39.8	34.769	45.734	11	3.2	MN	0.3	191
309	126416	2017/11/16 11:14:18.6	34.542	45.535	10	2.6	MN	0.6	284
310	126413	2017/11/16 12:11:30.0	34.761	45.792	10.7	2.8	MN	0.2	277
311	126412	2017/11/16 12:14:05.2	34.499	45.652	10	2.8	MN	0.2	326
312	126410	2017/11/16 13:00:33.9	34.517	45.766	8	3.8	MN	0.4	195
313	126418	2017/11/16 13:25:10.1	34.53	45.772	8.5	3.2	MN	0.3	194
314	126419	2017/11/16 13:52:01.0	34.511	45.753	10	2.8	MN	0.3	270
315	126420	2017/11/16 14:03:19.7	34.386	45.691	10	2.6	MN	0.8	297
316	126421	2017/11/16 14:22:47.0	34.608	46.264	7.8	3.3	MN	0.5	155
317	126422	2017/11/16 14:35:40.4	34.329	45.632	12	2.8	MN	0.4	273
318	126425	2017/11/16 14:52:46.2	34.618	45.791	10	2.6	MN	0.1	271
319	126426	2017/11/16 15:06:55.5	34.627	46.394	10	2.8	MN	0.2	166
320	126430	2017/11/16 16:07:54.7	34.444	46.257	7.5	3.2	MN	0.3	157
No.	Event ID	Origin Time	Lat.	Long.	Depth(km)	Mag.	Mag. Type	RMS(sec)	Azimuthal Gap (deg)
321	126434	2017/11/16 16:25:29.8	35.287	44.994	10	2.8	MN	0.5	261
322	126432	2017/11/16 16:33:19.6	34.718	46.063	10	2.6	MN	0.2	302
323	126436	2017/11/16 17:33:13.0	34.637	46.27	6.6	3.2	MN	0.2	154
324	126437	2017/11/16 17:53:25.8	34.661	46.283	8	2.8	MN	0.1	281
325	126438	2017/11/16 18:03:33.7	34.62	46.28	10	2.6	MN	0.2	267
326	126439	2017/11/16 18:13:45.3	34.614	46.215	10	2.8	MN	0.3	296
327	126444	2017/11/16 20:12:05.9	34.623	46.304	10.2	2.9	MN	0.3	162
328	126449	2017/11/16 21:47:19.8	34.831	45.828	12	2.5	MN	0.5	297
329	126450	2017/11/16 21:52:42.8	34.833	45.804	6.5	3	MN	0.4	185
330	126452	2017/11/16 22:13:58.7	34.78	45.826	7.5	3.1	MN	0.2	184
331	126457	2017/11/16 22:55:47.0	34.536	45.638	9.1	2.7	MN	0.2	238
332	126461	2017/11/17 01:17:35.6	35.115	45.782	6	3.2	MN	0.3	180
333	126465	2017/11/17 01:40:01.9	34.848	45.699	12	2.9	MN	0.3	285
334	126470	2017/11/17 03:20:37.2	34.901	45.872	10	2.5	MN	0.1	281
335	126475	2017/11/17 03:39:50.1	34.039	45.096	10	2.6	MN	0.8	306
336	126478	2017/11/17 04:47:27.4	35.049	45.907	10	2.5	MN	0.3	288
337	126482	2017/11/17 05:50:20.1	34.585	46.054	10	2.8	MN	0.6	301
338	126486	2017/11/17 05:57:26.8	34.568	46.022	6	2.5	MN	0.2	255
339	126490	2017/11/17 06:43:04.8	34.815	45.935	10	2.6	MN	0.2	274
340	126503	2017/11/17 09:27:17.3	34.337	45.704	11.3	3.6	MN	0.3	202
No.	Event ID	Origin Time	Lat.	Long.	Depth(km)	Mag.	Mag. Type	RMS(sec)	Azimuthal Gap (deg)
341	126504	2017/11/17 09:37:17.5	35.054	45.808	8	2.7	MN	0.4	190
342	126510	2017/11/17 11:26:50.9	34.723	45.682	7.6	2.7	MN	0.2	281
343	126511	2017/11/17 11:52:38.5	34.646	46.267	12	2.7	MN	0.3	238
344	126513	2017/11/17 12:24:05.1	34.506	45.785	10.7	3.9	MN	0.3	112
345	126516	2017/11/17 13:44:29.3	34.617	45.487	13.1	2.8	MN	0.4	294
346	126518	2017/11/17 14:02:52.1	34.59	45.601	13	4.2	MN	0.3	164
347	126526	2017/11/17 15:23:44.9	34.606	46.299	8	3.1	MN	0.4	87
348	126539	2017/11/17 18:36:59.8	34.776	45.764	8	2.8	MN	0.5	250
349	126540	2017/11/17 18:47:52.6	34.618	46.22	8	2.6	MN	0.4	161
350	126549	2017/11/17 19:16:08.3	34.23	45.578	10	2.7	MN	0.3	223
351	126547	2017/11/17 20:29:53.0	34.623	46.374	8	2.9	MN	0.3	86
352	126553	2017/11/17 21:04:20.4	34.62	45.647	10	2.7	MN	0.3	231
353	126561	2017/11/17 21:38:09.2	34.597	46.201	7.4	2.5	MN	0.6	156
354	126566	2017/11/17 23:18:42.9	34.719	45.554	10	2.9	MN	0.4	268
355	126567	2017/11/17 23:43:21.6	34.626	46.095	8.7	3.2	MN	0.3	88
356	126568	2017/11/17 23:45:41.2	34.579	46.26	8.4	3.1	MN	0.3	80
357	126570	2017/11/18 01:04:39.9	34.617	46.306	5.9	3.4	MN	0.5	87
358	126571	2017/11/18 01:10:03.6	34.359	45.798	8	2.9	MN	0.5	155
359	126575	2017/11/18 01:40:44.4	34.615	46.281	9.3	2.5	MN	0.2	147
360	126577	2017/11/18 02:06:08.6	34.614	46.185	10	2.5	MN	0.4	165
No.	Event ID	Origin Time	Lat.	Long.	Depth(km)	Mag.	Mag. Type	RMS(sec)	Azimuthal Gap (deg)
361	126578	2017/11/18 02:48:44.4	34.472	45.802	9.4	3.1	MN	0.3	123
362	126579	2017/11/18 02:52:53.0	34.594	46.198	10.9	3.2	MN	0.4	80
363	126585	2017/11/18 03:52:27.5	34.507	45.733	11.7	2.6	MN	0.4	159
364	126581	2017/11/18 04:12:13.9	34.524	45.627	13.2	4.5	MN	0.3	88
365	126590	2017/11/18 04:36:26.3	34.569	45.925	10	2.6	MN	0.4	170
366	126594	2017/11/18 06:32:27.4	34.632	46.296	7.3	3.4	MN	0.3	115
367	126596	2017/11/18 07:26:50.9	34.875	45.681	10	2.5	MN	0.4	273
368	126599	2017/11/18 08:48:47.8	34.665	46.419	10	2.6	MN	0.2	163
369	126610	2017/11/18 10:46:17.7	34.825	45.865	9	2.5	MN	0.2	259
370	126613	2017/11/18 11:08:17.3	34.699	45.737	12.2	2.9	MN	0.2	238
371	126614	2017/11/18 11:28:27.2	34.783	45.643	8.6	3.3	MN	0.4	166
372	126618	2017/11/18 12:41:41.5	34.708	45.85	10	2.7	MN	0.3	224
373	126623	2017/11/18 13:24:10.5	34.813	45.488	11.4	2.6	MN	0.3	293
374	126634	2017/11/18 15:48:53.1	34.648	46.281	10.2	2.9	MN	0.2	236
375	126640	2017/11/18 17:20:27.1	34.864	45.784	10	2.7	MN	0.4	145
376	126641	2017/11/18 17:32:03.2	34.599	46.158	10	2.8	MN	0.2	82
377	126649	2017/11/18 19:54:21.0	34.827	45.735	10	2.7	MN	0.4	150
378	126661	2017/11/18 22:53:46.0	34.941	46.082	8	2.8	MN	0.4	229
379	126660	2017/11/18 23:05:41.0	34.392	45.666	12	3.3	MN	0.2	182
380	126662	2017/11/18 23:34:46.3	34.492	45.737	9.1	2.5	MN	0.3	153
No.	Event ID	Origin Time	Lat.	Long.	Depth(km)	Mag.	Mag. Type	RMS(sec)	Azimuthal Gap (deg)
381	126664	2017/11/18 23:53:14.0	34.571	46.162	8	2.7	MN	0.5	153
382	126669	2017/11/19 00:05:14.9	34.815	45.775	10	2.9	MN	0.3	143
383	126670	2017/11/19 00:12:50.4	35.005	45.556	10	2.6	MN	0.4	180
384	126666	2017/11/19 00:14:40.2	34.466	46.534	9.8	2.5	MN	0.1	136
385	126673	2017/11/19 00:45:25.7	34.61	45.829	10	2.5	MN	0.3	188
386	126677	2017/11/19 01:02:59.4	35.141	45.893	10	2.5	MN	0.4	140
387	126678	2017/11/19 01:07:33.0	34.444	45.922	8	4.1	MN	0.6	119
388	126684	2017/11/19 01:55:01.2	34.426	45.95	6	3.1	MN	0.3	120
389	126691	2017/11/19 02:58:31.0	34.476	45.939	10	2.6	MN	0.1	171
390	126690	2017/11/19 02:59:15.5	34.419	45.923	8	3.9	MN	0.5	124
391	126693	2017/11/19 03:18:40.1	34.456	45.961	10	2.5	MN	0.3	175
392	126703	2017/11/19 03:57:56.3	34.384	45.484	10	2.6	MN	0.4	299
393	126705	2017/11/19 04:17:37.2	34.516	45.937	10	2.5	MN	0.3	159
394	126712	2017/11/19 06:19:49.2	35.157	46.334	6	4.2	MN	0.4	45
395	126714	2017/11/19 06:41:36.8	34.432	45.91	8	2.9	MN	0.5	130
396	126719	2017/11/19 07:17:05.5	34.655	45.737	10	2.7	MN	0.4	226
397	126723	2017/11/19 09:25:41.2	34.43	45.914	8.6	2.5	MN	0.4	129
398	126730	2017/11/19 12:18:15.7	34.946	45.901	8	2.8	MN	0.4	270
399	126733	2017/11/19 12:59:28.9	34.521	46.343	8	2.7	MN	0.4	184
400	126735	2017/11/19 13:56:37.1	34.559	45.927	8	3.5	MN	0.3	93
No.	Event ID	Origin Time	Lat.	Long.	Depth(km)	Mag.	Mag. Type	RMS(sec)	Azimuthal Gap (deg)
401	126737	2017/11/19 14:04:58.6	34.458	45.761	7.1	3.5	MN	0.6	133
402	126739	2017/11/19 14:15:00.3	34.43	45.739	8	2.6	MN	0.4	147
403	126745	2017/11/19 17:29:32.8	34.446	45.871	8	2.5	MN	0.3	135
404	126750	2017/11/19 20:47:31.5	34.578	46.223	6	3.2	MN	0.6	81
405	126751	2017/11/19 21:01:35.7	34.783	45.822	6.2	3.3	MN	0.2	134
406	126752	2017/11/19 21:18:59.7	34.611	46.196	10	2.7	MN	0.1	163
407	126755	2017/11/19 21:54:25.1	34.652	46.164	8.3	2.7	MN	0.2	183
408	126762	2017/11/19 23:07:59.5	34.587	46.205	7.2	3.3	MN	0.3	81
409	126761	2017/11/19 23:57:51.3	34.755	45.815	10	2.5	MN	0.3	132
410	126754	2017/11/20 03:54:04.2	34.686	45.815	8.6	2.8	MN	0.6	132
411	126769	2017/11/20 04:54:27.7	34.735	45.63	7.5	3.5	MN	0.3	166
412	126782	2017/11/20 09:21:03.1	34.645	46.273	11.5	2.6	MN	0	164
413	126786	2017/11/20 09:58:47.6	34.007	46.626	6	2.5	MN	0.5	121
414	126788	2017/11/20 11:21:17.6	34.602	45.827	11	3.2	MN	0.3	106
415	126791	2017/11/20 12:09:59.7	34.308	45.692	10	2.6	MN	0.5	189
416	126792	2017/11/20 12:11:59.7	34.684	46.305	7.2	2.7	MN	0.2	278
417	126794	2017/11/20 12:44:09.7	34.944	45.927	17.8	2.5	MN	0	281
418	126795	2017/11/20 13:08:30.3	34.656	46.34	10	2.7	MN	0.2	215
419	126796	2017/11/20 13:13:36.7	34.993	45.841	8.3	3.1	MN	0.6	183
420	126797	2017/11/20 13:33:54.0	34.658	46.303	8	3	MN	0.4	91
No.	Event ID	Origin Time	Lat.	Long.	Depth(km)	Mag.	Mag. Type	RMS(sec)	Azimuthal Gap (deg)
421	126800	2017/11/20 14:36:10.3	34.555	45.829	10	2.6	MN	0.2	172
422	126802	2017/11/20 15:35:59.6	34.827	45.876	27.4	4.3	MN	0.5	110
423	126803	2017/11/20 15:36:54.4	34.668	45.734	8	4.5	MN	0.4	135
424	126806	2017/11/20 16:27:16.3	34.595	46.05	10	2.5	MN	0.2	169
425	126809	2017/11/20 17:34:56.8	34.634	46.336	6	2.5	MN	0.5	135
426	126810	2017/11/20 17:47:06.3	34.56	45.676	8	3.1	MN	0.5	121
427	126822	2017/11/20 20:17:45.4	34.631	46.255	10	2.5	MN	0.2	236
428	126821	2017/11/20 20:58:22.8	34.364	45.7	10	2.7	MN	0.5	177
429	126830	2017/11/21 02:21:40.2	34.545	45.055	19.5	2.8	MN	0.1	321
430	126831	2017/11/21 02:25:11.1	35.076	45.877	8	3.1	MN	0.4	141
431	126832	2017/11/21 02:26:52.7	34.67	46.36	8.5	2.8	MN	0.3	209
432	126836	2017/11/21 04:06:09.5	34.67	46.126	7.1	2.6	MN	0.4	180
433	126837	2017/11/21 04:18:22.5	34.738	45.694	14.2	2.6	MN	0.2	253
434	126845	2017/11/21 07:41:04.9	34.894	46.05	8.1	2.7	MN	0.3	274
435	126865	2017/11/21 11:57:31.0	34.725	45.706	7.8	2.5	MN	0.4	156
436	126868	2017/11/21 12:18:21.1	34.395	45.949	11.3	3	MN	0.4	127
437	126869	2017/11/21 12:22:03.8	34.42	45.92	5	2.8	MN	0.5	125
438	126872	2017/11/21 12:47:10.1	34.491	45.905	5	2.5	MN	0.4	153
439	126875	2017/11/21 14:10:41.3	34.773	45.791	6	3.4	MN	0.4	138
440	126879	2017/11/21 16:08:14.6	34.823	45.96	12	2.5	MN	0.3	219
No.	Event ID	Origin Time	Lat.	Long.	Depth(km)	Mag.	Mag. Type	RMS(sec)	Azimuthal Gap (deg)
441	126881	2017/11/21 16:27:48.9	34.746	45.848	10	2.8	MN	0.3	126
442	126884	2017/11/21 17:46:20.7	34.536	45.676	6.9	4	MN	0.6	104
443	126885	2017/11/21 17:48:34.5	34.628	45.647	4.4	2.7	MN	0.2	154
444	126897	2017/11/21 20:30:04.4	34.603	45.818	6	3	MN	0.4	107
445	126901	2017/11/21 21:06:17.9	34.575	46.265	8	2.6	MN	0.4	85
446	126911	2017/11/21 23:54:38.7	34.648	46.298	8	2.9	MN	0.5	79
447	126923	2017/11/22 02:12:25.8	34.8	45.558	10	2.7	MN	0.2	183
448	126928	2017/11/22 03:43:32.3	34.763	45.748	11	3.5	MN	0.3	144
449	126930	2017/11/22 04:13:46.1	34.407	45.847	8	3.5	MN	0.5	136
450	126938	2017/11/22 07:18:32.0	34.546	46.145	7.3	2.5	MN	0.3	203
451	126941	2017/11/22 08:24:01.2	34.573	46.111	11	2.6	MN	0.4	207
452	126948	2017/11/22 09:56:34.4	34.186	45.166	11.8	3.7	MN	0.3	245
453	126953	2017/11/22 11:02:15.8	34.907	45.752	8.2	3.2	MN	0.3	151
454	126958	2017/11/22 12:14:06.3	34.528	46.158	10	2.5	MN	0.1	140
455	126968	2017/11/22 16:42:36.0	34.922	45.756	12	4.2	MN	0.7	117
456	126971	2017/11/22 18:47:59.9	35.042	45.794	8.8	3	MN	0.3	160
457	126973	2017/11/22 19:12:51.3	34.582	45.806	13.5	3.7	MN	0.3	103
458	126974	2017/11/22 19:15:35.8	34.768	45.697	11.3	3.2	MN	0.3	154
459	126978	2017/11/22 19:47:13.8	34.73	45.655	15	4.2	MN	0.6	124
460	126981	2017/11/22 20:34:04.0	34.731	45.715	11.2	4.2	MN	0.4	144
No.	Event ID	Origin Time	Lat.	Long.	Depth(km)	Mag.	Mag. Type	RMS(sec)	Azimuthal Gap (deg)
461	126982	2017/11/22 20:56:06.2	33.884	46.473	13.7	3.2	MN	0.3	114
462	126997	2017/11/23 03:18:42.4	34.498	45.801	8	2.5	MN	0.2	154
463	126998	2017/11/23 03:21:08.3	34.594	45.832	10	2.5	MN	0.2	183
464	127003	2017/11/23 03:55:05.3	34.441	45.92	8	2.6	MN	0.3	133
465	127007	2017/11/23 06:12:05.7	34.473	45.915	8	3.2	MN	0.3	113
466	127021	2017/11/23 07:13:07.0	34.905	45.715	8	2.5	MN	0.4	254
467	127009	2017/11/23 07:16:19.0	34.496	45.892	10	2.9	MN	0.3	151
468	127011	2017/11/23 07:47:21.9	34.521	45.921	6	2.5	MN	0.3	158
469	127013	2017/11/23 09:39:11.6	34.735	45.711	10	2.9	MN	0.3	236
470	127027	2017/11/23 14:00:15.0	34.44	45.817	8	3.4	MN	0.4	131
471	127029	2017/11/23 19:57:59.7	34.523	45.706	7.6	2.9	MN	0.2	172
472	126454	2017/11/23 20:15:53.0	34.542	45.678	12	3	MN	0.5	110
473	127032	2017/11/23 20:57:47.0	34.538	45.68	14	2.7	MN	0.3	183
474	127035	2017/11/23 21:02:42.8	34.607	45.668	11.2	2.6	MN	0.3	220
475	127034	2017/11/23 22:00:43.3	34.49	45.919	9	2.6	MN	0.8	189
476	127038	2017/11/23 23:07:03.7	34.533	46.099	8	2.6	MN	0.3	150
477	127048	2017/11/24 03:30:25.0	34.58	46.082	9	2.6	MN	0.4	164
478	127049	2017/11/24 03:44:59.9	34.632	46.333	6.5	2.5	MN	0.5	134
479	127057	2017/11/24 05:49:26.5	35.079	45.85	11	2.7	MN	0.5	155
480	127063	2017/11/24 07:11:58.3	34.779	45.646	9	2.9	MN	0.3	171
No.	Event ID	Origin Time	Lat.	Long.	Depth(km)	Mag.	Mag. Type	RMS(sec)	Azimuthal Gap (deg)
481	127066	2017/11/24 07:22:40.0	34.486	45.911	9.3	3.3	MN	0.4	110
482	127070	2017/11/24 09:00:58.8	34.601	46.131	9	2.9	MN	0.4	167
483	127079	2017/11/24 11:32:10.4	34.564	45.808	9.4	3.4	MN	0.4	106
484	127085	2017/11/24 13:37:59.6	34.598	46.398	11.9	3.2	MN	0.5	84
485	127092	2017/11/24 15:24:15.2	34.707	46.268	8.3	2.5	MN	0.4	282
486	127093	2017/11/24 15:58:43.1	34.637	46.315	7.3	3.2	MN	0.3	78
487	127097	2017/11/24 17:05:51.4	34.722	45.677	8.5	3.4	MN	0.4	155
488	127111	2017/11/24 20:44:39.5	34.536	45.829	9	2.8	MN	0.3	166
489	127119	2017/11/24 23:15:10.4	34.653	45.988	7.3	2.6	MN	0.4	175
490	127127	2017/11/25 00:15:08.2	34.638	46.361	9.4	2.9	MN	0.3	184
491	127137	2017/11/25 03:06:52.4	34.5	45.632	9.5	2.9	MN	0.4	205
492	127140	2017/11/25 03:22:27.3	34.611	45.731	15.2	2.9	MN	0.1	312
493	127141	2017/11/25 03:37:30.0	34.475	45.454	8.4	2.5	MN	0.7	287
494	127144	2017/11/25 04:06:53.8	34.503	45.965	8.3	2.7	MN	0.3	314
495	127155	2017/11/25 06:41:10.6	34.661	45.707	10.9	2.9	MN	0.2	321
496	127154	2017/11/25 07:46:08.4	34.739	45.486	15.3	2.6	MN	0.4	289
497	127162	2017/11/25 09:29:46.0	34.873	45.744	11.6	2.7	MN	0.5	284
498	127176	2017/11/25 12:28:23.9	34.083	46.197	10	2.7	MN	0.2	195
499	127181	2017/11/25 15:32:24.4	34.649	46.096	7.3	2.7	MN	0.3	177
500	127182	2017/11/25 15:52:58.5	34.588	46.348	8	2.8	MN	0.3	160
No.	Event ID	Origin Time	Lat.	Long.	Depth(km)	Mag.	Mag. Type	RMS(sec)	Azimuthal Gap (deg)
501	127184	2017/11/25 18:19:15.4	34.591	46.018	10	2.7	MN	0.1	259
502	127187	2017/11/25 19:41:29.2	34.659	45.694	8	2.6	MN	0.2	279
503	127189	2017/11/25 20:34:19.3	34.662	46.31	7.6	2.7	MN	0.3	200
504	127190	2017/11/25 21:08:01.4	34.582	46.136	10	2.8	MN	0.4	244
505	127197	2017/11/25 22:17:56.5	34.484	45.676	8	2.5	MN	0.3	274
506	127204	2017/11/26 01:18:43.1	34.918	45.861	8	2.7	MN	0.3	189
507	127205	2017/11/26 02:35:08.0	34.576	46.077	12	2.5	MN	0.1	303
508	127207	2017/11/26 04:24:11.3	34.686	46.22	8	2.7	MN	0.4	248
509	127213	2017/11/26 05:47:31.1	34.562	45.785	15.1	4.4	MN	0.7	159
510	127214	2017/11/26 06:30:45.8	34.416	45.716	7.8	2.8	MN	0.4	271
511	127222	2017/11/26 08:41:12.5	34.598	45.77	7.1	3.1	MN	0.4	193
512	127236	2017/11/26 12:37:47.1	34.569	45.747	12	2.9	MN	0.7	272
513	127238	2017/11/26 13:37:07.1	34.629	45.393	13.7	2.8	MN	0.3	291
514	127250	2017/11/26 17:43:44.0	34.537	46.2	6	2.8	MN	0.5	223
515	127251	2017/11/26 18:22:40.0	34.698	46.27	7.9	2.6	MN	0.4	246
516	127252	2017/11/26 18:42:54.2	34.606	45.81	6.4	3.1	MN	0.5	189
517	127266	2017/11/26 20:47:14.2	34.63	45.389	10	2.9	MN	0.5	291
518	127263	2017/11/26 22:36:24.3	34.717	45.627	8.6	2.5	MN	0.2	335
519	127261	2017/11/26 23:06:37.3	34.507	45.824	8	3.3	MN	0.4	191
520	127269	2017/11/26 23:53:27.3	34.66	46.271	8	3	MN	0.3	154
No.	Event ID	Origin Time	Lat.	Long.	Depth(km)	Mag.	Mag. Type	RMS(sec)	Azimuthal Gap (deg)
521	127272	2017/11/27 00:38:51.3	34.503	45.902	6.7	3	MN	0.2	184
522	127276	2017/11/27 02:10:09.9	34.9	45.836	6	3.2	MN	0.6	183
523	127279	2017/11/27 03:00:28.1	34.758	45.702	9.2	3.9	MN	0.5	190
524	127293	2017/11/27 05:33:06.1	34.785	46.389	8	2.6	MN	0.5	163
525	127294	2017/11/27 05:37:49.9	34.484	45.822	8	3.2	MN	0.4	192
526	127298	2017/11/27 06:28:41.4	34.761	45.704	8.3	3	MN	0.4	200
527	127299	2017/11/27 06:54:47.8	34.748	45.635	7.4	2.7	MN	0.3	284
528	127300	2017/11/27 07:19:29.3	34.636	46.325	8	3.2	MN	0.3	150
529	127310	2017/11/27 09:50:53.5	34.843	45.902	8.3	3.1	MN	0.4	178
530	127321	2017/11/27 13:11:32.0	34.845	45.839	8.2	3.3	MN	0.2	191
531	127339	2017/11/27 18:55:07.7	34.775	46.291	7.1	2.5	MN	0.3	252
532	127350	2017/11/27 20:50:09.8	34.802	45.64	8.3	2.6	MN	0.2	238
533	127360	2017/11/28 01:30:31.0	33.887	47.05	8	3.7	MN	0.3	111
534	127371	2017/11/28 05:11:33.9	34.603	46.344	7.5	2.9	MN	0.4	193
535	127372	2017/11/28 05:48:59.8	34.537	45.774	9	2.6	MN	0.3	270
536	127381	2017/11/28 09:19:37.1	34.65	46.251	8.8	2.6	MN	0.3	243
537	127386	2017/11/28 09:54:06.8	34.737	45.661	9.1	3.2	MN	0.2	166
538	127398	2017/11/28 13:16:03.0	34.494	45.726	8	2.8	MN	0.2	151
539	127399	2017/11/28 13:22:25.6	35.231	45.805	8	3.9	MN	0.5	150
540	127416	2017/11/28 19:55:38.2	34.545	45.925	8	2.5	MN	0.4	164
No.	Event ID	Origin Time	Lat.	Long.	Depth(km)	Mag.	Mag. Type	RMS(sec)	Azimuthal Gap (deg)
541	127424	2017/11/28 23:32:03.6	34.443	45.628	8	2.5	MN	0.3	184
542	127427	2017/11/29 00:12:12.5	34.621	45.682	10	2.5	MN	0.4	140
543	127433	2017/11/29 01:46:11.2	34.026	47.353	7.5	3.4	MN	0.5	103
544	127440	2017/11/29 03:39:54.2	34.648	46.381	11.8	2.9	MN	0.4	177
545	127441	2017/11/29 04:03:23.3	34.552	46.017	9	2.6	MN	0.4	162
546	127444	2017/11/29 04:56:41.7	34.011	47.349	8	2.5	MN	0.4	109
547	127481	2017/11/29 15:31:08.8	34.536	46.179	8	3.6	MN	0.5	88
548	127486	2017/11/29 15:54:27.7	34.63	46.218	8.5	2.7	MN	0.2	167
549	127484	2017/11/29 16:27:09.3	34.589	45.655	8	2.5	MN	0.5	0
550	127491	2017/11/29 16:57:09.3	34.158	46.266	8	2.5	MN	0.4	117
551	127508	2017/11/30 00:10:38.4	34.577	45.841	9.5	3	MN	0.2	99
552	127515	2017/11/30 01:04:08.2	34.632	46.264	8	2.7	MN	0.5	159
553	127511	2017/11/30 02:39:23.1	34.003	47.353	10	2.5	MN	0.2	158
554	127513	2017/11/30 03:12:10.9	34.576	46.162	10	2.7	MN	0.4	154
555	127516	2017/11/30 03:23:44.9	34.594	45.975	8	3.2	MN	0.4	91
556	127522	2017/11/30 05:46:28.5	34.648	45.556	12	2.5	MN	0.2	194
557	127526	2017/11/30 07:20:52.1	34.505	45.836	8.2	3.2	MN	0.5	109
558	127533	2017/11/30 10:22:18.2	34.632	45.756	10	2.5	MN	0.4	206
559	127543	2017/11/30 14:06:12.7	34.607	45.796	12	2.9	MN	0.5	192
560	127548	2017/11/30 16:00:13.9	34.487	45.547	10.9	2.5	MN	0.5	305
No.	Event ID	Origin Time	Lat.	Long.	Depth(km)	Mag.	Mag. Type	RMS(sec)	Azimuthal Gap (deg)
561	127549	2017/11/30 16:00:42.8	34.531	45.575	10	2.8	MN	0.4	207
562	127555	2017/11/30 18:05:57.2	34.99	46.428	12	2.5	MN	0.3	272
563	127560	2017/11/30 19:10:51.2	34.749	45.768	10	2.8	MN	0.3	197
564	127568	2017/11/30 21:08:40.4	34.748	45.941	5	2.8	MN	0.5	125
565	127580	2017/11/30 22:29:14.9	35.001	45.787	6	3.9	MN	0.4	150
566	127641	2017/12/01 04:50:46.5	35.012	45.904	10	2.7	MN	0.3	249
567	127657	2017/12/01 05:56:48.1	34.62	45.829	9.4	3.1	MN	0.3	117
568	127662	2017/12/01 06:20:16.0	34.64	46.326	8.5	2.8	MN	0.3	142
569	127683	2017/12/01 08:33:15.0	34.686	46.499	10	2.7	MN	0.3	141
570	127717	2017/12/01 12:12:20.2	34.776	45.854	7.5	3.2	MN	0.3	129
571	127748	2017/12/01 15:11:23.1	34.812	45.947	15.7	2.9	MN	0.2	130
572	127751	2017/12/01 15:14:58.3	34.929	45.86	10	2.5	MN	0.4	242
573	127756	2017/12/01 16:04:54.3	34.656	46.301	7.2	2.6	MN	0.3	163
574	127789	2017/12/01 19:27:07.4	34.389	46.621	8	4	MN	0.5	62
575	127892	2017/12/01 20:15:07.8	34.46	46.652	6	2.7	MN	0.1	176
576	127798	2017/12/01 20:17:05.9	34.405	46.586	8	4.5	MN	0.5	75
577	127824	2017/12/01 22:41:21.4	34.971	45.778	17.9	2.5	MN	0.4	254
578	127837	2017/12/02 00:39:58.2	34.842	45.737	10	2.7	MN	0.2	151
579	127920	2017/12/02 11:16:01.8	33.971	46.439	10	2.6	MN	0.2	148
580	127991	2017/12/02 20:43:27.1	34.778	45.747	10	2.5	MN	0.4	280
No.	Event ID	Origin Time	Lat.	Long.	Depth(km)	Mag.	Mag. Type	RMS(sec)	Azimuthal Gap (deg)
581	128010	2017/12/02 23:48:58.2	34.572	45.829	10	2.5	MN	0.5	177
582	128044	2017/12/03 05:41:46.5	34.529	45.733	8.3	2.5	MN	0.2	170
583	128061	2017/12/03 09:03:12.3	34.679	46.303	11	2.8	MN	0.3	242
584	128083	2017/12/03 13:08:15.7	34.536	46.281	8.5	2.5	MN	0.3	204
585	128122	2017/12/03 20:44:36.1	34.862	45.752	9.5	2.5	MN	0.4	158
586	128133	2017/12/03 22:06:56.3	34.728	45.821	8	2.7	MN	0.3	128
587	128155	2017/12/04 00:32:45.8	35.133	45.777	8.2	3.1	MN	0.3	153
588	128162	2017/12/04 01:35:01.9	34.634	46.388	8.8	2.7	MN	0.2	100
589	128186	2017/12/04 06:40:30.0	34.079	46.187	15.3	3.4	MN	0.5	133
590	128203	2017/12/04 10:14:52.7	35.285	45.735	6.9	3.8	MN	0.2	158
591	128211	2017/12/04 11:07:53.7	34.914	46.17	9	2.7	MN	0.3	299
592	128237	2017/12/04 15:45:17.4	34.576	46.178	8	2.7	MN	0.3	152
593	128292	2017/12/05 02:21:55.5	34.646	46.646	10	2.7	MN	0.4	120
594	128293	2017/12/05 02:34:27.8	34.907	45.87	8.2	2.9	MN	0.2	146
595	128309	2017/12/05 06:37:36.8	34.244	45.706	9	2.7	MN	0.1	194
596	128325	2017/12/05 10:24:26.0	34.587	45.654	11.3	2.6	MN	0.5	225
597	128390	2017/12/06 04:53:57.7	34.559	45.837	10.1	2.5	MN	0.4	102
598	128393	2017/12/06 05:53:44.1	35.105	45.842	8	4.8	MN	0.5	91
599	128397	2017/12/06 07:57:41.1	34.502	45.661	14.1	4.7	MN	0.5	122
600	128399	2017/12/06 08:02:07.1	34.576	45.708	6	4.1	MN	0.3	197
No.	Event ID	Origin Time	Lat.	Long.	Depth(km)	Mag.	Mag. Type	RMS(sec)	Azimuthal Gap (deg)
601	128435	2017/12/06 18:12:05.2	34.695	46.307	10	2.9	MN	0.5	193
602	128456	2017/12/06 23:17:39.1	34.677	46.484	4.5	2.5	MN	0.1	117
603	128467	2017/12/07 03:54:10.0	34.567	45.561	11.3	3	MN	0.5	199
604	128475	2017/12/07 04:50:15.9	34.705	45.751	10	2.5	MN	0.4	224
605	128492	2017/12/07 15:30:48.6	34.731	45.678	8.7	3.4	MN	0.3	156
606	128493	2017/12/07 15:53:07.9	34.64	46.197	10	2.9	MN	0.4	291
607	128496	2017/12/07 16:47:42.8	34.524	45.803	10	2.8	MN	0.4	166
608	128510	2017/12/07 22:28:15.0	34.665	46.175	8	3.9	MN	0.6	87
609	128505	2017/12/07 22:59:30.7	34.141	45.348	11.3	3.2	MN	0.2	237
610	128515	2017/12/08 01:55:01.2	35.053	45.939	6	4.3	MN	0.6	60
611	128537	2017/12/08 05:32:52.9	34.595	46.446	10	2.6	MN	0.4	176
612	128539	2017/12/08 06:22:48.3	34.891	45.843	15.5	3.1	MN	0.2	148
613	128540	2017/12/08 06:48:11.8	33.788	46.433	10	2.6	MN	0.2	129
614	128543	2017/12/08 07:39:43.7	34.396	45.725	9.2	4.2	MN	0.4	162
615	128544	2017/12/08 08:48:36.1	35.285	45.718	8	3.3	MN	0.2	160
616	128545	2017/12/08 09:09:56.1	34.517	45.719	10.3	2.6	MN	0.4	164
617	128546	2017/12/08 09:12:04.7	34.585	45.693	10	2.6	MN	0.4	205
618	128559	2017/12/08 13:15:09.1	34.187	46.352	8	2.9	MN	0.3	105
619	128560	2017/12/08 13:50:02.7	34.917	46.495	6.1	3	MN	0.4	100
620	128561	2017/12/08 13:54:11.6	34.931	46.494	8	2.6	MN	0.4	251
No.	Event ID	Origin Time	Lat.	Long.	Depth(km)	Mag.	Mag. Type	RMS(sec)	Azimuthal Gap (deg)
621	128578	2017/12/08 23:44:33.7	34.62	46.036	9.4	2.5	MN	0.4	175
622	128596	2017/12/09 02:16:32.5	34.641	46.303	7.1	3.3	MN	0.4	79
623	128607	2017/12/09 03:38:11.8	34.521	45.871	10	2.5	MN	0.4	160
624	128605	2017/12/09 04:06:41.5	34.651	45.687	8.4	3.1	MN	0.4	150
625	128610	2017/12/09 06:00:59.1	34.569	45.705	10	2.5	MN	0.4	194
626	128612	2017/12/09 06:40:31.4	34.599	46.196	8	3.2	MN	0.4	90
627	128617	2017/12/09 07:49:29.1	34.566	45.683	10.9	3	MN	0.4	199
628	128616	2017/12/09 08:06:20.8	34.612	46.39	10	2.5	MN	0.3	206
629	128646	2017/12/09 15:22:35.3	34.543	45.706	10.6	3.1	MN	0.3	105
630	128655	2017/12/09 16:50:55.3	33.969	46.115	10	2.8	MN	0.4	154
631	128670	2017/12/09 19:39:57.6	34.625	45.651	10	2.6	MN	0.2	231
632	128671	2017/12/09 20:04:26.5	34.56	46.154	8	2.7	MN	0.4	87
633	128683	2017/12/09 23:34:32.1	34.404	45.793	5	2.8	MN	0.5	145
634	128704	2017/12/10 04:27:31.2	34.67	46.18	12	2.5	MN	0.3	250
635	128724	2017/12/10 09:48:38.8	34.554	46.226	11	2.5	MN	0.3	137
636	128737	2017/12/10 12:36:01.6	34.654	46.306	10	2.5	MN	0.3	231
637	128743	2017/12/10 14:29:38.1	34.651	46.308	8.2	3	MN	0.3	80
638	128748	2017/12/10 16:30:11.6	34.898	45.881	10	2.9	MN	0.4	236
639	128757	2017/12/10 18:55:03.4	34.453	45.911	8	3.2	MN	0.3	118
640	128775	2017/12/11 02:42:33.4	34.656	46.109	6	3	MN	0.5	90
No.	Event ID	Origin Time	Lat.	Long.	Depth(km)	Mag.	Mag. Type	RMS(sec)	Azimuthal Gap (deg)
641	128787	2017/12/11 05:54:54.1	34.548	45.711	9	2.9	MN	0.3	183
642	128789	2017/12/11 07:30:45.3	34.854	45.871	8	3.3	MN	0.4	132
643	128796	2017/12/11 10:52:39.0	34.95	45.764	8	2.9	MN	0.5	161
644	128801	2017/12/11 14:09:57.0	35.078	45.84	8	5.4	Mw	0.6	81
645	128803	2017/12/11 14:42:41.1	35.078	45.854	6	4.9	MN	0.5	78
646	128824	2017/12/11 22:45:10.5	34.595	45.561	8.3	3.3	MN	0.6	192
647	128834	2017/12/12 03:25:19.9	34.284	45.594	11	2.6	MN	0.4	217
648	128867	2017/12/12 10:11:15.0	34.85	45.639	10	2.5	MN	0.1	259
649	128930	2017/12/12 14:15:03.3	34.698	46.175	8	2.7	MN	0.4	183
650	129092	2017/12/13 04:31:10.2	34.831	45.856	8.2	2.7	MN	0.2	230
651	129096	2017/12/13 05:05:30.7	34.611	45.637	10	2.7	MN	0.4	233
652	129117	2017/12/13 07:09:06.1	34.611	46.235	6	3.6	MN	0.3	79
653	129192	2017/12/13 16:12:13.9	34.33	45.29	10	2.8	MN	0.3	283
654	129218	2017/12/13 18:51:49.4	34.636	46.301	10.9	2.8	MN	0.2	150
655	129239	2017/12/13 20:54:12.0	34.975	45.722	11.1	3.8	MN	0.2	158
656	129245	2017/12/13 21:24:21.9	34.648	46.301	11.7	2.8	MN	0.2	157
657	129278	2017/12/14 02:27:09.1	34.47	45.812	8	2.7	MN	0.4	122
658	129279	2017/12/14 02:32:19.9	34.593	46.421	10.2	2.7	MN	0.3	82
659	129285	2017/12/14 02:57:13.6	34.587	46.391	10	2.7	MN	0.3	169
660	129302	2017/12/14 06:05:02.5	34.61	46.384	8	3.1	MN	0.5	74
No.	Event ID	Origin Time	Lat.	Long.	Depth(km)	Mag.	Mag. Type	RMS(sec)	Azimuthal Gap (deg)
661	129307	2017/12/14 06:50:23.0	34.621	45.439	10	2.8	MN	0.5	303
662	129322	2017/12/14 09:14:22.2	34.744	45.754	8.9	3.4	MN	0.4	141
663	129348	2017/12/14 13:18:06.0	34.646	45.409	12	3.3	MN	0.3	215
664	129349	2017/12/14 13:26:49.8	34.624	45.42	11	4	MN	0.3	206
665	129352	2017/12/14 13:37:09.5	34.696	45.307	8.6	2.9	MN	0.2	295
666	129354	2017/12/14 14:17:25.3	34.628	46.638	10	2.5	MN	0.3	114
667	129365	2017/12/14 16:42:50.4	34.633	46.359	10	2.8	MN	0.5	192
668	129399	2017/12/15 00:31:36.9	34.642	45.803	8	2.9	MN	0.5	201
669	129409	2017/12/15 03:48:41.7	35.07	45.61	10	2.8	MN	0.5	275
670	129429	2017/12/15 08:00:37.9	34.5	45.681	8.8	3.1	MN	0.5	121
671	129431	2017/12/15 08:05:21.0	34.527	45.665	13.6	2.5	MN	0.4	109
672	129455	2017/12/15 11:37:57.8	34.76	45.922	10	2.9	MN	0.3	119
673	129492	2017/12/15 18:19:40.8	34.616	45.473	14.9	2.7	MN	0.2	288
674	129494	2017/12/15 18:27:54.3	35.197	45.584	8	2.5	MN	0.4	283
675	129521	2017/12/15 22:56:37.7	34.616	45.991	12.3	2.6	MN	0.2	93
676	129532	2017/12/16 00:54:35.9	34.891	45.859	10	2.5	MN	0.3	136
677	129553	2017/12/16 03:24:59.0	35.074	45.902	6	3.4	MN	0.3	138
678	129576	2017/12/16 10:45:50.8	34.669	46.139	11	2.6	MN	0.4	296
679	129640	2017/12/17 07:23:07.1	34.284	45.654	8	2.7	MN	0.4	201
680	129643	2017/12/17 07:55:07.7	34.571	45.94	8	2.7	MN	0.3	170
No.	Event ID	Origin Time	Lat.	Long.	Depth(km)	Mag.	Mag. Type	RMS(sec)	Azimuthal Gap (deg)
681	129690	2017/12/17 23:47:58.4	35.164	45.679	10	2.6	MN	0.4	187
682	129692	2017/12/18 00:14:07.4	35.281	45.756	10	2.5	MN	0.6	303
683	129702	2017/12/18 02:46:59.4	34.591	46.086	6	4	MN	0.5	85
684	129703	2017/12/18 02:58:32.2	34.923	45.904	8	2.6	MN	0.4	238
685	129716	2017/12/18 06:35:13.7	35.208	45.683	8.8	3.6	MN	0.2	164
686	129724	2017/12/18 10:06:04.1	35.076	46.198	10	2.6	MN	0.3	242
687	129756	2017/12/18 16:08:25.3	34.603	46.073	10	2.6	MN	0.2	170
688	129757	2017/12/18 16:26:04.8	34.518	45.693	11.5	3.1	MN	0.2	108
689	129763	2017/12/18 17:35:42.3	35.234	46.596	7.1	3.4	MN	0.3	111
690	129769	2017/12/18 19:10:17.1	34.666	45.355	10	2.7	MN	0.6	293
691	129768	2017/12/18 19:20:25.9	34.6	45.422	16.8	3.8	MN	0.3	216
692	129771	2017/12/18 19:45:45.3	35.114	45.809	10	2.6	MN	0.5	264
693	129825	2017/12/19 09:12:30.5	34.778	45.83	9	2.8	MN	0.3	225
694	129826	2017/12/19 09:15:47.4	34.763	45.857	8.6	4.2	MN	0.6	89
695	129827	2017/12/19 09:42:50.2	34.749	45.864	8.6	3.3	MN	0.4	125
696	129854	2017/12/19 14:37:01.5	34.63	45.695	9.1	2.5	MN	0.4	219
697	129857	2017/12/19 15:13:12.9	33.978	44.835	14.3	3.8	MN	0.6	254
698	129866	2017/12/19 18:47:29.1	34.716	45.857	9.4	3.4	MN	0.3	121
699	129916	2017/12/20 10:04:07.2	34.88	46.212	6.4	3.4	MN	0.3	101
700	129927	2017/12/20 13:07:14.8	34.637	45.648	10	2.6	MN	0.4	244
No.	Event ID	Origin Time	Lat.	Long.	Depth(km)	Mag.	Mag. Type	RMS(sec)	Azimuthal Gap (deg)
701	129929	2017/12/20 14:30:02.2	34.499	45.905	8	3	MN	0.4	108
702	129946	2017/12/20 18:28:08.0	34.568	45.472	18.4	2.8	MN	0.3	287
703	129956	2017/12/20 20:01:05.9	34.469	45.791	8	4.5	MN	0.4	124
704	129957	2017/12/20 20:22:06.6	34.649	46.253	5.7	4.6	MN	0.4	81
705	129965	2017/12/20 21:04:57.8	34.646	46.257	8	2.9	MN	0.5	167
706	129984	2017/12/21 02:50:14.7	34.563	45.777	13.9	4.4	MN	0.5	91
707	129989	2017/12/21 04:16:36.1	35.195	46.576	10	2.6	MN	0.4	266
708	130011	2017/12/21 07:46:16.3	34.645	45.707	8.6	3.5	MN	0.4	138
709	130045	2017/12/21 12:45:32.9	34.663	46.34	9.9	2.6	MN	0.3	150
710	133057	2017/12/21 20:12:53.7	34.916	46.504	8.7	2.6	MN	0.5	108
711	130102	2017/12/21 20:12:53.8	34.912	46.504	10	2.6	MN	0.5	108
712	130118	2017/12/21 22:48:35.4	34.641	46.253	7.6	3.7	MN	0.3	82
713	130141	2017/12/22 02:58:41.8	34.607	45.865	10	2.5	MN	0.2	323
714	130149	2017/12/22 04:44:23.6	34.456	45.698	10	2.6	MN	0.3	274
715	130166	2017/12/22 10:06:40.4	34.62	45.763	10	2.5	MN	0.4	209
716	130170	2017/12/22 13:40:07.7	34.489	45.789	11.4	2.7	MN	0.5	150
717	130193	2017/12/22 21:24:41.4	34.501	46.286	7.2	2.7	MN	0.3	112
718	130201	2017/12/22 23:20:35.0	34.523	45.523	12.7	3.4	MN	0.3	212
719	130209	2017/12/23 03:30:31.2	34.485	45.861	11.7	2.6	MN	0.5	149
720	130225	2017/12/23 08:03:38.2	34.494	46.278	9	2.6	MN	0.5	113
No.	Event ID	Origin Time	Lat.	Long.	Depth(km)	Mag.	Mag. Type	RMS(sec)	Azimuthal Gap (deg)
721	130249	2017/12/23 16:31:48.8	34.647	46.316	8	3.2	MN	0.5	90
722	130256	2017/12/23 18:16:16.7	34.144	46.573	18	2.7	MN	0.2	134
723	130284	2017/12/24 06:03:07.7	34.762	46.203	9.2	2.6	MN	0.2	229
724	130286	2017/12/24 06:52:24.3	34.865	45.912	7.2	3.8	MN	0.5	128
725	130302	2017/12/24 11:13:33.5	34.68	45.793	12	2.9	MN	0.3	212
726	130322	2017/12/25 01:55:32.1	34.586	46.102	10	2.5	MN	0.2	165
727	130347	2017/12/25 06:42:07.6	34.974	46.441	10.6	2.6	MN	0.2	268
728	130362	2017/12/25 09:49:45.6	34.622	46.383	8	2.7	MN	0.2	158
729	130377	2017/12/25 14:29:11.1	34.545	45.676	10	2.9	MN	0.5	188
730	130400	2017/12/25 18:48:00.0	34.675	45.77	5	2.7	MN	0.3	137
731	130406	2017/12/25 20:14:40.6	34.265	46.544	10	2.5	MN	0.2	139
732	130411	2017/12/25 21:52:21.4	34.693	45.731	8	2.9	MN	0.4	140
733	130445	2017/12/26 07:02:51.9	34.654	46.135	11	2.5	MN	0.4	310
734	130454	2017/12/26 09:11:31.7	34.844	46.152	8.2	4.4	MN	0.6	75
735	130467	2017/12/26 13:25:05.7	34.044	46.336	8.1	2.9	MN	0.2	113
736	130471	2017/12/26 15:32:58.4	34.624	46.302	6	3.6	MN	0.6	78
737	130495	2017/12/27 01:15:52.8	34.297	45.697	10	2.6	MN	0.9	189
738	130496	2017/12/27 01:35:16.7	34.896	45.854	11.2	2.8	MN	0.7	138
739	130512	2017/12/27 06:15:41.1	34.089	46.329	12	2.5	MN	0.5	172
740	130561	2017/12/27 19:48:21.9	34.951	45.846	8	2.5	MN	0.5	246
No.	Event ID	Origin Time	Lat.	Long.	Depth(km)	Mag.	Mag. Type	RMS(sec)	Azimuthal Gap (deg)
741	130572	2017/12/28 01:41:50.4	34.668	46.326	8	2.5	MN	0.5	162
742	130590	2017/12/28 06:49:37.0	34.746	45.846	8.1	3.6	MN	0.6	126
743	130604	2017/12/28 10:09:51.6	34.72	45.608	8	2.5	MN	0.4	256
744	130620	2017/12/28 15:12:58.8	34.555	45.769	13.8	2.5	MN	0.2	177
745	130638	2017/12/28 19:29:26.6	33.836	46.58	7.6	3.3	MN	0.3	103
746	130687	2017/12/29 13:07:35.6	34.728	45.74	5	3.1	MN	0.3	143
747	130688	2017/12/29 13:50:40.2	34.758	45.678	8.2	3.6	MN	0.4	158
748	130691	2017/12/29 14:02:57.6	35.142	45.79	8	2.7	MN	0.3	263
749	130696	2017/12/29 16:29:47.6	34.716	45.528	8.8	4.1	MN	0.2	185
750	130700	2017/12/29 18:29:31.9	34.517	45.705	9.9	3.1	MN	0.3	109
751	130723	2017/12/30 04:49:40.4	34.657	46.272	8	2.9	MN	0.6	170
752	130811	2017/12/30 19:45:04.5	34.801	45.779	10	2.7	MN	0.3	298
753	130903	2017/12/31 20:04:58.2	34.85	45.767	10	2.6	MN	0.4	243
754	130914	2017/12/31 22:59:49.8	35.098	45.81	8	3.2	MN	0.4	149
755	130951	2018/01/01 13:49:03.5	34.76	45.648	8	3.1	MN	0.3	164
756	130961	2018/01/01 19:54:31.8	34.638	45.817	6.8	3.7	MN	0.4	114
757	130983	2018/01/02 06:18:42.1	34.889	45.591	8.6	2.5	MN	0.2	286
758	130986	2018/01/02 07:02:11.7	34.689	46.334	15	2.5	MN	0.2	240
759	130994	2018/01/02 07:52:52.4	34.668	46.129	10	2.6	MN	0.3	297
760	131058	2018/01/03 12:12:42.1	34.649	46.324	8	2.7	MN	0.4	149
No.	Event ID	Origin Time	Lat.	Long.	Depth(km)	Mag.	Mag. Type	RMS(sec)	Azimuthal Gap (deg)
761	131065	2018/01/03 15:24:22.9	34.694	45.746	8	2.5	MN	0.2	222
762	131114	2018/01/04 08:18:37.2	33.939	46.986	10.8	2.6	MN	0	207
763	131113	2018/01/04 08:19:10.2	33.985	47.05	12.1	3	MN	0.3	119
764	131117	2018/01/04 08:52:10.0	33.945	47.018	12	3	MN	0.3	124
765	131125	2018/01/04 11:46:19.1	34.491	45.992	12	2.7	MN	0.5	249
766	131147	2018/01/05 06:32:57.7	34.53	45.698	8	4	MN	0.5	100
767	131149	2018/01/05 07:13:27.9	34.588	46.281	10	2.6	MN	0.4	214
768	131168	2018/01/05 11:55:03.3	35.146	45.877	8	2.8	MN	0.3	264
769	131198	2018/01/06 01:44:23.2	34.75	45.715	8	2.8	MN	0.4	149
770	131230	2018/01/06 15:22:08.4	34.471	45.759	6.4	5	MN	0.3	128
771	131231	2018/01/06 15:27:09.9	34.434	45.804	8	3.4	MN	0.4	135
772	131237	2018/01/06 16:29:13.2	34.459	45.785	8	2.8	MN	0.3	138
773	131238	2018/01/06 16:36:42.6	34.544	45.773	8	2.8	MN	0.2	173
774	131247	2018/01/06 17:39:50.7	34.526	45.791	8	2.7	MN	0.3	165
775	131248	2018/01/06 17:44:40.0	34.353	46.093	10	2.8	MN	0.5	118
776	131255	2018/01/06 19:06:32.5	34.426	45.793	8	2.5	MN	0.3	138
777	131276	2018/01/07 02:01:43.6	34.406	45.794	8.4	3.9	MN	0.4	145
778	131278	2018/01/07 02:53:16.8	34.393	45.766	8	3.3	MN	0.5	153
779	131279	2018/01/07 03:02:32.8	34.715	45.573	10	2.6	MN	0.3	264
780	131285	2018/01/07 05:22:13.7	34.418	45.794	8.8	3.1	MN	0.4	141
No.	Event ID	Origin Time	Lat.	Long.	Depth(km)	Mag.	Mag. Type	RMS(sec)	Azimuthal Gap (deg)
781	131295	2018/01/07 08:44:50.6	34.403	45.79	10	2.6	MN	0.4	146
782	131304	2018/01/07 10:54:10.2	34.437	45.769	10	2.5	MN	0.4	139
783	131318	2018/01/07 18:23:06.3	34.795	45.737	7.3	3.1	MN	0.3	156
784	131319	2018/01/07 18:23:58.3	34.826	45.715	16	3	MN	0.5	246
785	131351	2018/01/08 09:36:33.1	34.432	45.783	10	2.5	MN	0.2	139
786	131377	2018/01/08 17:45:08.3	33.966	47.017	8	3.3	MN	0.4	124
787	131383	2018/01/08 20:24:54.8	34.378	45.871	10	2.9	MN	0.4	139
788	131398	2018/01/09 04:19:17.9	35.105	45.728	16.1	2.8	MN	0.4	269
789	131417	2018/01/09 13:16:27.0	34.629	46.024	8	3.3	MN	0.4	93
790	131436	2018/01/10 00:38:03.8	34.583	46.796	10	2.8	MN	0.3	93
791	131449	2018/01/10 05:33:19.8	34.581	46.823	6	2.9	MN	0.5	91
792	131463	2018/01/10 10:47:29.7	34.585	46.059	9	2.6	MN	0.3	195
793	131467	2018/01/10 12:57:16.3	34.452	45.769	10	2.7	MN	0.6	134
794	131475	2018/01/10 15:56:26.9	34.576	46.802	9.2	4.6	MN	0.5	54
795	131487	2018/01/10 20:31:34.1	34.573	46.775	10	2.5	MN	0.3	92
796	131498	2018/01/11 00:45:44.9	34.588	46.803	10	2.9	MN	0.5	94
797	131512	2018/01/11 05:09:22.8	34.782	46.299	10.6	2.6	MN	0.4	252
798	131875	2018/01/11 06:59:29.8	33.712	45.693	8.4	5.6	MN	0.5	219
799	131639	2018/01/11 07:00:53.9	33.667	45.714	12	5.1	MN	0.6	257
800	131516	2018/01/11 07:14:15.5	33.722	45.709	9.4	5.4	MN	0.4	215
No.	Event ID	Origin Time	Lat.	Long.	Depth(km)	Mag.	Mag. Type	RMS(sec)	Azimuthal Gap (deg)
801	131517	2018/01/11 07:21:33.8	33.7	45.719	12	5.2	MN	0.3	243
802	131518	2018/01/11 07:34:15.3	33.737	45.699	8	3.4	MN	0.6	248
803	131533	2018/01/11 07:37:09.7	33.762	45.731	12	4.2	MN	0.7	242
804	131532	2018/01/11 07:42:52.7	33.702	45.635	12	3.3	MN	0.2	258
805	131521	2018/01/11 07:45:30.9	33.822	45.698	11.4	3.5	MN	0.3	237
806	131534	2018/01/11 07:49:18.9	33.684	45.633	12	3.5	MN	0.2	251
807	131535	2018/01/11 07:52:47.9	33.815	45.747	11.8	4.3	MN	0.4	211
808	131519	2018/01/11 07:55:00.2	33.733	45.703	8.2	5.1	MN	0.3	215
809	131520	2018/01/11 08:00:39.1	33.724	45.686	10.9	5.4	MN	0.7	215
810	131522	2018/01/11 08:05:56.9	33.722	45.671	11.9	3.8	MN	0.7	253
811	131523	2018/01/11 08:09:38.8	33.733	45.626	11.1	3.3	MN	0.4	255
812	131524	2018/01/11 08:12:49.3	33.716	45.865	17.3	3.4	MN	0.4	236
813	131526	2018/01/11 08:14:03.5	33.736	45.705	15.3	3.1	MN	0.5	248
814	131525	2018/01/11 08:17:55.9	33.641	45.622	8.4	4.1	MN	0.3	221
815	131537	2018/01/11 08:25:35.0	33.665	45.633	9.3	3.7	MN	0.3	241
816	131538	2018/01/11 08:29:03.5	33.804	45.659	12.3	4	MN	0.2	244
817	131540	2018/01/11 08:33:22.8	33.637	45.707	10	2.8	MN	0.3	296
818	131531	2018/01/11 08:43:24.8	33.676	45.643	9.3	3.3	MN	0.3	261
819	131527	2018/01/11 08:46:23.7	33.679	45.671	11.7	3.1	MN	0.3	258
820	131528	2018/01/11 08:53:34.1	33.703	45.677	9.3	3.9	MN	0.2	218
No.	Event ID	Origin Time	Lat.	Long.	Depth(km)	Mag.	Mag. Type	RMS(sec)	Azimuthal Gap (deg)
821	131529	2018/01/11 08:57:07.3	33.661	45.703	18.8	3.2	MN	0.3	259
822	131530	2018/01/11 09:06:48.8	33.678	45.702	16.2	3.9	MN	0.5	217
823	131543	2018/01/11 09:11:55.3	33.693	45.696	10	2.8	MN	0.3	290
824	131544	2018/01/11 09:13:58.4	33.787	45.626	8	2.6	MN	0.3	296
825	131536	2018/01/11 09:23:55.7	33.677	45.706	13.4	4.1	MN	0.4	216
826	131539	2018/01/11 09:32:24.9	33.706	45.653	8	4.2	MN	0.4	216
827	131541	2018/01/11 09:42:32.8	33.762	45.651	8	2.7	MN	0.4	287
828	131542	2018/01/11 09:46:26.0	33.637	45.483	7.2	3.4	MN	0.1	259
829	131545	2018/01/11 10:03:41.8	33.7	45.723	12.2	3.7	MN	0.3	235
830	131546	2018/01/11 10:05:12.3	33.784	45.685	11.8	3.7	MN	0.3	244
831	131547	2018/01/11 10:06:38.0	33.706	45.833	12	3	MN	0.5	241
832	131548	2018/01/11 10:13:05.8	33.644	45.69	16.5	3.8	MN	0.5	248
833	131549	2018/01/11 10:14:10.0	33.703	45.696	8	3.6	MN	0.2	254
834	131550	2018/01/11 10:23:22.1	33.771	45.832	8.3	2.9	MN	0.5	230
835	131552	2018/01/11 10:24:33.0	33.775	45.694	10.6	3.4	MN	0.3	244
836	131551	2018/01/11 10:25:46.6	33.765	45.758	8	3.2	MN	0.2	239
837	131553	2018/01/11 10:27:56.9	33.76	45.689	11.2	3.7	MN	0.2	245
838	131554	2018/01/11 10:34:39.2	33.696	45.693	10	2.6	MN	0.5	318
839	131555	2018/01/11 10:41:27.9	33.672	45.68	13	3.6	MN	0.3	219
840	131556	2018/01/11 10:50:04.1	33.981	45.573	10	2.7	MN	0.4	237
No.	Event ID	Origin Time	Lat.	Long.	Depth(km)	Mag.	Mag. Type	RMS(sec)	Azimuthal Gap (deg)
841	131557	2018/01/11 11:01:08.3	33.788	45.68	8.3	3.3	MN	0.3	244
842	131558	2018/01/11 11:04:50.8	33.742	45.768	13	3.1	MN	0.4	241
843	131564	2018/01/11 11:43:56.8	33.805	45.878	11.8	3	MN	0.4	218
844	131569	2018/01/11 12:06:54.5	34.011	46.174	10	2.7	MN	0.4	235
845	131570	2018/01/11 12:18:39.4	33.804	45.76	8.3	3.4	MN	0.3	234
846	131571	2018/01/11 12:29:32.1	33.741	45.811	17.4	3	MN	0.3	237
847	131573	2018/01/11 12:34:16.0	33.761	45.65	17.3	3.4	MN	0.5	250
848	131574	2018/01/11 12:38:35.9	33.76	45.688	10.8	3.4	MN	0.2	247
849	131576	2018/01/11 12:45:44.7	33.601	45.705	12	2.8	MN	0.1	300
850	131577	2018/01/11 12:48:38.0	33.733	45.695	11.3	3	MN	0.4	250
851	131578	2018/01/11 12:49:32.6	33.674	45.815	17.3	3	MN	0.3	249
852	131583	2018/01/11 13:16:43.0	33.724	45.735	7.7	4.3	MN	0.3	214
853	131586	2018/01/11 13:27:08.1	33.647	45.699	10	2.8	MN	0.3	295
854	131587	2018/01/11 13:30:46.7	33.74	45.654	8.3	4.1	MN	0.7	219
855	131590	2018/01/11 13:46:16.4	33.738	45.711	10	2.9	MN	0.3	285
856	131591	2018/01/11 13:52:04.9	33.761	45.725	15.3	3	MN	0.3	242
857	131592	2018/01/11 13:56:40.1	33.763	45.679	8	2.5	MN	0.3	285
858	131595	2018/01/11 14:28:09.5	33.745	45.732	11.4	3.5	MN	0.3	244
859	131596	2018/01/11 14:37:19.6	33.722	45.736	8	3.7	MN	0.2	234
860	131597	2018/01/11 14:47:17.9	33.723	45.699	8.5	4	MN	0.3	215
No.	Event ID	Origin Time	Lat.	Long.	Depth(km)	Mag.	Mag. Type	RMS(sec)	Azimuthal Gap (deg)
861	131598	2018/01/11 15:01:12.6	33.743	45.628	10	2.6	MN	0.5	289
862	131599	2018/01/11 15:23:44.3	33.754	45.655	11.3	2.7	MN	0.4	251
863	131600	2018/01/11 15:24:34.8	33.797	45.711	10.7	3.5	MN	0.2	240
864	131601	2018/01/11 15:30:43.2	34.034	45.89	18	2.6	MN	0.4	185
865	131605	2018/01/11 15:50:36.5	33.714	45.721	8	2.9	MN	0.3	287
866	131604	2018/01/11 16:05:19.4	34.416	45.781	8	3	MN	0.4	143
867	131609	2018/01/11 16:23:25.5	33.755	45.667	10	2.6	MN	0.3	286
868	131613	2018/01/11 16:58:47.4	34.603	46.784	8.7	3.2	MN	0.3	98
869	131615	2018/01/11 17:11:03.0	33.756	45.73	12	2.7	MN	0.3	243
870	131622	2018/01/11 17:53:12.1	33.754	45.668	10	2.7	MN	0.4	249
871	131627	2018/01/11 18:35:49.5	33.785	45.661	11	3.1	MN	0.1	246
872	131629	2018/01/11 18:53:48.7	33.735	45.747	14.5	3	MN	0.4	244
873	131630	2018/01/11 19:07:11.7	33.744	45.672	9	2.5	MN	0.1	287
874	131631	2018/01/11 19:22:56.2	33.795	45.761	9	3.4	MN	0.2	235
875	131635	2018/01/11 19:32:45.3	33.641	45.647	8.6	3.1	MN	0.3	264
876	131642	2018/01/11 20:19:40.2	33.653	45.697	8	4	MN	0.4	216
877	131646	2018/01/11 20:30:01.2	34.599	46.807	10	2.8	MN	0.4	104
878	131640	2018/01/11 20:40:17.2	33.766	45.852	5	3.2	MN	0.2	229
879	131643	2018/01/11 20:54:39.6	33.779	45.598	8	2.5	MN	0.4	252
880	131649	2018/01/11 21:13:05.5	33.818	45.665	16.1	3.1	MN	0.2	237
No.	Event ID	Origin Time	Lat.	Long.	Depth(km)	Mag.	Mag. Type	RMS(sec)	Azimuthal Gap (deg)
881	131651	2018/01/11 21:22:45.6	33.806	45.722	7.8	3.4	MN	0.3	237
882	131652	2018/01/11 21:50:44.2	33.775	45.685	8	4.4	MN	0.3	215
883	131653	2018/01/11 21:52:22.8	33.779	45.648	7.7	4.3	MN	0.3	248
884	131654	2018/01/11 21:54:58.5	33.822	45.711	8	3	MN	0.3	237
885	131655	2018/01/11 21:57:07.8	33.802	45.706	12.8	3.4	MN	0.3	239
886	131661	2018/01/11 22:43:35.4	33.675	45.743	16.9	3.2	MN	0.2	234
887	131665	2018/01/11 22:59:30.6	33.723	45.689	11.2	3.4	MN	0.5	237
888	131666	2018/01/11 23:11:54.0	33.808	45.739	10.9	3.4	MN	0.3	235
889	131667	2018/01/11 23:14:32.1	33.8	45.614	10	2.6	MN	0.3	249
890	131671	2018/01/11 23:44:00.3	33.822	45.729	11.7	3.6	MN	0.3	213
891	131672	2018/01/12 00:03:59.8	33.706	45.569	10	2.5	MN	0.3	263
892	133785	2018/01/12 00:11:31.3	33.786	45.704	11	2.9	MN	0.4	241
893	131673	2018/01/12 00:11:31.3	33.787	45.704	10	2.9	MN	0.4	241
894	131674	2018/01/12 00:14:47.4	33.738	45.689	7.8	3.1	MN	0.4	247
895	131677	2018/01/12 00:54:40.6	33.672	45.664	8	3.2	MN	0.4	294
896	131681	2018/01/12 01:18:20.9	33.802	45.617	11.6	3.1	MN	0.3	248
897	131682	2018/01/12 01:35:47.3	33.803	45.646	10	2.8	MN	0.4	245
898	131683	2018/01/12 01:42:25.8	33.779	45.679	10	2.8	MN	0.4	245
899	131684	2018/01/12 01:55:02.8	33.731	45.699	12	2.6	MN	0.3	249
900	131688	2018/01/12 02:34:51.5	33.675	45.68	8	2.9	MN	0.2	294
No.	Event ID	Origin Time	Lat.	Long.	Depth(km)	Mag.	Mag. Type	RMS(sec)	Azimuthal Gap (deg)
901	131692	2018/01/12 02:44:00.5	33.754	45.663	10	2.5	MN	0.3	249
902	131693	2018/01/12 02:44:51.3	33.804	45.609	8	2.8	MN	0.3	286
903	131694	2018/01/12 02:51:30.9	33.707	45.733	10	2.5	MN	0.3	250
904	131696	2018/01/12 03:29:07.4	33.682	45.674	12	3	MN	0.4	258
905	131699	2018/01/12 04:05:56.1	33.787	45.616	8	2.9	MN	0.4	250
906	131703	2018/01/12 04:49:01.6	33.785	45.573	10	2.5	MN	0.3	289
907	131707	2018/01/12 05:09:42.7	33.771	45.823	8.4	2.8	MN	0.4	231
908	131716	2018/01/12 07:06:55.5	33.819	45.678	8	2.9	MN	0.2	280
909	131719	2018/01/12 07:29:48.4	33.808	45.659	10	2.5	MN	0.5	282
910	131722	2018/01/12 07:49:26.7	33.714	45.745	8.2	3.4	MN	0.1	234
911	131724	2018/01/12 08:09:04.1	33.764	45.747	9.2	2.7	MN	0.2	240
912	131725	2018/01/12 08:16:29.6	33.821	45.71	8	2.5	MN	0.4	277
913	131726	2018/01/12 08:18:56.5	33.803	45.652	8	2.9	MN	0.4	245
914	131737	2018/01/12 10:13:43.2	33.719	45.717	8	2.5	MN	0.5	286
915	131741	2018/01/12 10:34:17.9	33.682	45.73	8	2.5	MN	0.4	290
916	131744	2018/01/12 11:29:45.9	33.819	45.625	8	2.9	MN	0.4	283
917	131746	2018/01/12 11:43:48.7	33.702	45.69	8.8	3.9	MN	0.2	217
918	131749	2018/01/12 12:00:15.1	33.783	45.745	8	3.1	MN	0.3	238
919	131750	2018/01/12 12:11:36.6	33.748	45.734	8.9	2.7	MN	0.5	244
920	131754	2018/01/12 12:54:58.1	33.775	45.93	10	2.5	MN	0.4	241
No.	Event ID	Origin Time	Lat.	Long.	Depth(km)	Mag.	Mag. Type	RMS(sec)	Azimuthal Gap (deg)
921	131757	2018/01/12 13:14:48.5	33.73	45.771	8	2.6	MN	0.2	282
922	131762	2018/01/12 14:01:55.5	33.789	45.667	10	2.8	MN	0.3	245
923	131763	2018/01/12 14:04:50.5	33.758	45.649	8	2.6	MN	0.1	287
924	131777	2018/01/12 17:50:40.5	33.645	45.671	7.3	4.3	MN	0.3	216
925	131781	2018/01/12 18:16:08.6	33.729	45.733	14.5	2.6	MN	0.4	246
926	131782	2018/01/12 18:24:12.2	33.767	45.762	5	2.6	MN	0.5	238
927	131783	2018/01/12 18:56:02.3	33.708	45.693	8.3	3.3	MN	0.4	253
928	131784	2018/01/12 18:58:27.1	33.761	45.747	14.1	3.4	MN	0.3	241
929	131787	2018/01/12 19:12:20.7	33.847	45.893	5	3.1	MN	0.4	209
930	131786	2018/01/12 19:14:16.7	33.728	45.64	8	3.9	MN	0.4	221
931	131796	2018/01/12 20:24:25.4	33.643	45.681	8	3.4	MN	0.4	263
932	131797	2018/01/12 20:38:17.2	33.795	45.658	8	2.6	MN	0.4	245
933	131798	2018/01/12 20:39:41.6	33.739	45.828	10	2.5	MN	0.3	276
934	131799	2018/01/12 21:00:58.3	33.749	45.708	10	2.6	MN	0.2	246
935	131803	2018/01/12 22:32:04.0	33.838	45.67	8	2.6	MN	0.3	239
936	131808	2018/01/13 00:18:36.8	33.719	45.816	18	2.5	MN	0.5	241
937	131811	2018/01/13 00:33:26.8	33.66	45.708	8	4.2	MN	0.5	216
938	131813	2018/01/13 00:45:18.8	33.689	45.709	8.7	2.6	MN	0.4	254
939	131819	2018/01/13 01:03:31.8	33.668	45.631	7.9	3	MN	0.5	262
940	131821	2018/01/13 01:21:43.2	33.764	45.638	9.5	2.5	MN	0.4	251
No.	Event ID	Origin Time	Lat.	Long.	Depth(km)	Mag.	Mag. Type	RMS(sec)	Azimuthal Gap (deg)
941	131829	2018/01/13 02:26:51.4	33.691	45.73	10	2.6	MN	0.5	253
942	131840	2018/01/13 03:15:31.1	33.741	45.607	8.4	3.2	MN	0.4	255
943	131844	2018/01/13 03:52:26.9	33.701	45.726	10.8	3.2	MN	0.2	251
944	131845	2018/01/13 04:17:30.7	33.706	45.775	7.5	2.8	MN	0.3	284
945	131848	2018/01/13 04:58:51.2	33.608	45.414	12	2.7	MN	0.2	308
946	131851	2018/01/13 06:12:50.5	33.552	45.437	10	2.9	MN	0.2	311
947	131853	2018/01/13 06:30:30.3	33.671	45.707	8	4.3	MN	0.3	236
948	131854	2018/01/13 06:37:32.9	33.72	45.678	12	2.6	MN	0.5	289
949	131858	2018/01/13 07:10:14.1	33.761	45.577	10	2.6	MN	0.6	291
950	131861	2018/01/13 08:26:49.7	33.715	45.641	8	2.5	MN	0.6	291
951	131862	2018/01/13 08:54:12.4	33.773	45.797	9.1	2.6	MN	0.4	275
952	131869	2018/01/13 09:24:19.7	33.718	45.699	12.1	4.2	MN	0.3	216
953	131870	2018/01/13 09:31:53.8	33.726	45.654	7.7	4.1	MN	0.3	219
954	131873	2018/01/13 09:57:31.0	33.691	45.589	8	2.8	MN	0.5	296
955	131879	2018/01/13 11:22:36.5	33.792	45.744	11	3.5	MN	0.2	237
956	131882	2018/01/13 13:16:26.3	33.785	45.697	12.7	3.4	MN	0.2	243
957	131883	2018/01/13 13:33:47.7	33.727	45.608	10	2.9	MN	0.5	292
958	131887	2018/01/13 15:35:53.8	33.678	45.665	10	2.8	MN	0.3	293
959	131888	2018/01/13 15:49:18.6	34.85	45.617	10	2.5	MN	0.3	323
960	131890	2018/01/13 16:14:34.0	34.556	46.135	6	2.6	MN	0.3	158
No.	Event ID	Origin Time	Lat.	Long.	Depth(km)	Mag.	Mag. Type	RMS(sec)	Azimuthal Gap (deg)
961	131893	2018/01/13 16:37:42.3	33.813	45.721	11.1	3.3	MN	0.3	236
962	131898	2018/01/13 17:42:19.8	33.82	45.748	8.7	2.7	MN	0.7	232
963	131900	2018/01/13 18:48:16.3	33.795	45.647	10.8	3.3	MN	0.3	239
964	131902	2018/01/13 19:37:05.7	34.078	45.306	10	2.9	MN	0.5	268
965	131910	2018/01/13 20:38:19.3	33.739	45.751	12	2.8	MN	0.7	282
966	131909	2018/01/13 21:13:10.5	33.716	45.641	12.4	3.1	MN	0.2	256
967	131908	2018/01/13 21:48:48.3	33.773	45.852	8	3	MN	0.4	226
968	131907	2018/01/13 22:04:41.1	33.906	45.684	10	2.5	MN	0.4	274
969	131912	2018/01/14 00:44:35.8	33.772	45.712	9.2	2.9	MN	0.4	243
970	131911	2018/01/14 00:47:49.8	33.788	45.706	8	3.4	MN	0.2	241
971	131915	2018/01/14 01:01:01.7	33.746	45.675	10	2.5	MN	0.6	250
972	131916	2018/01/14 02:30:11.4	33.779	45.689	8	3.2	MN	0.2	245
973	131921	2018/01/14 03:54:57.8	33.787	45.695	8	3.4	MN	0.4	242
974	131944	2018/01/14 03:57:17.0	33.789	45.672	9	2.5	MN	0.3	293
975	131922	2018/01/14 04:13:54.6	33.743	45.868	8	2.9	MN	0.6	230
976	131928	2018/01/14 05:15:57.0	34.404	45.772	9	2.5	MN	0.5	149
977	131931	2018/01/14 05:21:00.5	33.714	45.743	9	2.6	MN	0.4	329
978	131933	2018/01/14 06:06:56.3	33.761	45.638	13.3	2.9	MN	0.3	251
979	131936	2018/01/14 06:54:28.4	33.675	45.493	10.2	2.8	MN	0.4	301
980	131937	2018/01/14 07:30:25.4	33.633	45.869	16.5	2.9	MN	0.5	289
No.	Event ID	Origin Time	Lat.	Long.	Depth(km)	Mag.	Mag. Type	RMS(sec)	Azimuthal Gap (deg)
981	131947	2018/01/14 12:50:13.6	33.746	45.71	8	2.5	MN	0.3	284
982	131949	2018/01/14 13:24:42.7	33.744	45.705	5	2.7	MN	0.3	305
983	131951	2018/01/14 14:22:46.8	35.034	45.962	6	3.2	MN	0.3	143
984	131960	2018/01/14 17:17:05.7	33.665	45.743	9.1	3.5	MN	0.3	245
985	131964	2018/01/14 19:45:47.1	34.396	45.851	8	4	MN	0.8	174
986	131966	2018/01/14 20:30:08.9	33.834	45.624	18	3.2	MN	0.3	259
987	131967	2018/01/14 20:58:24.8	33.689	45.785	8	2.8	MN	0.4	249
988	131968	2018/01/14 21:56:50.7	33.764	45.727	9.5	2.8	MN	0.3	242
989	131972	2018/01/14 22:57:31.8	33.711	45.712	8	2.7	MN	0.4	251
990	131978	2018/01/14 23:54:35.7	33.693	45.704	8.7	2.6	MN	0.4	254
991	131982	2018/01/15 00:41:50.3	33.668	45.69	9.2	2.5	MN	0.4	258
992	131983	2018/01/15 01:34:41.3	33.785	45.703	8	3.3	MN	0.2	255
993	131995	2018/01/15 06:58:55.9	34.666	45.667	11	3.6	MN	0.3	152
994	132008	2018/01/15 12:13:19.8	35.189	45.64	8.5	2.5	MN	0.3	320
995	132130	2018/01/15 12:33:56.3	33.724	45.67	8	2.6	MN	0.3	289
996	132009	2018/01/15 12:36:35.7	33.784	45.793	9.3	2.6	MN	0.5	273
997	132014	2018/01/15 13:39:12.5	34.509	45.714	11.7	2.9	MN	0.2	121
998	132017	2018/01/15 15:04:58.0	33.689	45.676	11.2	3.5	MN	0.4	239
999	132020	2018/01/15 15:46:13.8	34.603	46.532	9.1	2.6	MN	0.1	135
1000	132022	2018/01/15 17:00:49.7	33.621	45.702	8.4	3.6	MN	0.3	238
No.	Event ID	Origin Time	Lat.	Long.	Depth(km)	Mag.	Mag. Type	RMS(sec)	Azimuthal Gap (deg)
1001	132036	2018/01/15 22:53:50.1	33.701	45.67	8.2	3.3	MN	0.3	253
1002	132039	2018/01/15 23:30:48.1	33.792	45.687	10	2.5	MN	0.4	243
1003	132041	2018/01/15 23:35:12.4	33.713	45.721	8	2.9	MN	0.3	250
1004	132049	2018/01/16 04:25:33.4	33.781	45.721	8	3.7	MN	0.3	233
1005	132050	2018/01/16 04:33:32.5	33.713	45.652	8	2.5	MN	0.4	255
1006	132052	2018/01/16 05:42:00.2	33.812	45.725	8	3.3	MN	0.2	236
1007	132053	2018/01/16 05:47:00.8	33.745	45.632	8	2.6	MN	0.2	289
1008	132056	2018/01/16 06:22:22.0	33.806	45.754	11.9	3.3	MN	0.2	234
1009	132073	2018/01/16 11:08:25.9	33.751	45.696	7.7	2.6	MN	0.3	247
1010	132088	2018/01/16 13:38:03.6	34.908	45.903	10	2.9	MN	0.5	142
1011	132091	2018/01/16 15:29:59.8	33.696	45.7	15.4	3.7	MN	0.3	247
1012	132093	2018/01/16 16:27:34.8	34.646	46.178	7.1	2.9	MN	0.3	173
1013	132099	2018/01/16 19:34:31.3	33.767	45.659	8	2.7	MN	0.4	249
1014	132101	2018/01/16 19:56:25.5	33.811	45.728	8	3.6	MN	0.2	236
1015	132114	2018/01/16 23:45:20.6	33.695	45.726	10	2.6	MN	0.3	252
1016	132115	2018/01/17 00:55:12.7	34.598	46.515	8	2.8	MN	0.4	238
1017	132116	2018/01/17 01:08:22.3	34.594	46.51	10	2.6	MN	0.4	146
1018	132140	2018/01/17 08:28:43.1	34.605	46.802	6	2.5	MN	0.4	97
1019	132158	2018/01/17 14:41:56.3	33.793	45.718	8	3.3	MN	0.2	239
1020	132165	2018/01/17 16:48:08.2	33.761	45.916	8.8	2.9	MN	0.4	221
No.	Event ID	Origin Time	Lat.	Long.	Depth(km)	Mag.	Mag. Type	RMS(sec)	Azimuthal Gap (deg)
1021	132166	2018/01/17 16:51:42.1	33.69	45.811	8.8	3	MN	0.4	246
1022	132167	2018/01/17 16:56:39.9	33.725	45.804	10	2.6	MN	0.4	241
1023	132171	2018/01/17 17:57:20.0	33.692	45.725	13.2	2.9	MN	0.3	257
1024	132172	2018/01/17 17:58:59.5	33.684	45.632	14	2.8	MN	0.4	286
1025	132174	2018/01/17 18:58:45.9	34.554	45.845	5	2.8	MN	0.4	171
1026	132176	2018/01/17 19:41:24.9	33.723	45.734	12	2.6	MN	0.4	247
1027	132182	2018/01/17 22:09:24.5	33.835	45.721	8	3.1	MN	0.3	234
1028	132197	2018/01/18 02:54:49.0	33.708	45.767	8.5	3.6	MN	0.4	213
1029	132198	2018/01/18 03:02:19.5	33.691	45.756	13.5	2.8	MN	0.4	250
1030	132205	2018/01/18 06:04:00.8	33.782	45.667	11.5	3.2	MN	0.4	246
1031	132212	2018/01/18 08:13:35.9	33.824	45.598	10	2.8	MN	0.3	286
1032	132213	2018/01/18 08:25:00.8	34.653	45.538	10	2.5	MN	0	282
1033	132214	2018/01/18 08:30:10.2	33.735	45.652	10	2.5	MN	0.4	289
1034	132216	2018/01/18 09:10:29.6	33.757	45.774	9	2.5	MN	0.3	278
1035	132233	2018/01/18 16:48:42.0	34.556	45.669	9.1	4	MN	0.5	118
1036	132234	2018/01/18 16:58:38.9	33.753	45.694	10	2.5	MN	0.2	284
1037	132241	2018/01/18 18:18:30.5	33.79	45.681	11	3.5	MN	0.4	217
1038	132246	2018/01/18 22:25:01.5	34.432	45.809	8	2.9	MN	0.4	134
1039	132247	2018/01/18 22:28:25.8	34.403	45.777	9.4	3.2	MN	0.5	149
1040	132250	2018/01/19 00:38:39.4	33.698	45.673	12.1	3.1	MN	0.5	256
No.	Event ID	Origin Time	Lat.	Long.	Depth(km)	Mag.	Mag. Type	RMS(sec)	Azimuthal Gap (deg)
1041	132251	2018/01/19 00:40:24.3	33.653	45.567	10	2.6	MN	0.6	268
1042	132254	2018/01/19 02:40:12.2	33.771	45.527	19.2	3	MN	0.4	260
1043	132279	2018/01/19 18:02:24.3	33.909	45.793	11.9	3.5	MN	0.2	239
1044	132281	2018/01/19 21:46:22.1	33.779	45.709	10	2.7	MN	0.4	254
1045	132282	2018/01/19 22:17:56.0	33.709	45.699	8.8	5	MN	0.6	215
1046	132298	2018/01/19 22:31:34.0	33.766	45.513	10	2.8	MN	0.4	302
1047	132284	2018/01/19 22:33:28.3	33.764	45.617	8.6	3.1	MN	0.2	250
1048	132283	2018/01/19 22:45:47.2	33.712	45.473	19.3	3.1	MN	0.4	265
1049	132285	2018/01/19 22:49:17.4	33.807	45.525	10	2.5	MN	0	266
1050	132295	2018/01/19 23:10:18.3	33.702	45.626	10	2.9	MN	0.6	285
1051	132286	2018/01/19 23:16:09.6	33.603	45.75	6.1	3.8	MN	0.3	244
1052	132294	2018/01/19 23:24:29.8	33.663	45.722	10.7	3.4	MN	0.3	247
1053	132293	2018/01/19 23:41:18.5	33.631	45.599	10	2.5	MN	0.6	288
1054	132289	2018/01/20 00:47:56.3	33.776	45.638	10	2.5	MN	0.2	282
1055	132288	2018/01/20 01:52:48.8	33.786	45.596	12	2.6	MN	0.4	284
1056	132287	2018/01/20 02:05:51.0	33.725	45.638	8.8	3.6	MN	0.4	250
1057	132311	2018/01/20 07:23:57.2	33.916	45.814	19.4	2.9	MN	0.5	240
1058	132316	2018/01/20 10:35:53.8	33.64	45.548	13.2	2.6	MN	0.5	316
1059	132322	2018/01/20 13:03:59.0	33.763	45.615	8	2.5	MN	0.3	297
1060	132323	2018/01/20 13:10:53.4	33.869	45.64	20	3.1	MN	0.3	256
No.	Event ID	Origin Time	Lat.	Long.	Depth(km)	Mag.	Mag. Type	RMS(sec)	Azimuthal Gap (deg)
1061	132328	2018/01/20 15:56:00.4	33.843	45.747	18	2.8	MN	0.5	249
1062	132335	2018/01/20 18:24:13.8	34.663	45.704	10	2.9	MN	0.3	142
1063	132337	2018/01/20 19:24:36.9	35.114	45.515	8	3	MN	0.3	185
1064	132351	2018/01/21 00:38:12.9	33.772	45.729	10.6	3.1	MN	0.3	242
1065	132353	2018/01/21 01:07:01.7	33.781	45.869	12	3.1	MN	0.4	244
1066	132357	2018/01/21 02:19:37.6	34.528	45.547	17.1	4.1	MN	0.5	215
1067	132358	2018/01/21 02:24:37.8	34.629	45.565	10	2.7	MN	0.2	265
1068	132360	2018/01/21 02:36:24.9	34.644	45.562	10	2.7	MN	0.2	265
1069	132362	2018/01/21 02:40:52.3	34.61	45.63	10	2.9	MN	0.2	158
1070	132363	2018/01/21 02:49:01.7	34.648	45.54	10	2.5	MN	0.3	273
1071	132367	2018/01/21 03:51:38.2	34.603	45.54	12.7	2.9	MN	0.2	278
1072	132373	2018/01/21 05:45:39.0	34.548	45.586	15.6	4.1	MN	0.3	175
1073	132374	2018/01/21 05:51:28.8	34.589	45.552	14.1	2.9	MN	0.2	274
1074	132377	2018/01/21 05:59:59.8	34.664	45.631	6.4	2.7	MN	0.5	244
1075	132383	2018/01/21 07:05:15.5	34.693	45.683	7	2.6	MN	0.3	235
1076	132384	2018/01/21 07:24:45.5	34.461	45.635	10	2.8	MN	0.2	221
1077	132386	2018/01/21 07:25:57.2	34.654	45.593	9	2.6	MN	0.4	255
1078	132385	2018/01/21 07:27:22.1	34.568	45.594	10.6	3.3	MN	0.2	173
1079	132392	2018/01/21 07:47:13.4	34.53	45.583	13.3	2.6	MN	0.3	261
1080	132410	2018/01/21 13:21:16.5	33.699	45.687	9	3.5	MN	0.3	306
No.	Event ID	Origin Time	Lat.	Long.	Depth(km)	Mag.	Mag. Type	RMS(sec)	Azimuthal Gap (deg)
1081	132415	2018/01/21 15:05:53.8	34.61	46.774	10	2.8	MN	0.5	101
1082	132420	2018/01/21 17:01:20.2	33.714	45.765	7.5	2.7	MN	0.1	291
1083	132422	2018/01/21 18:00:53.3	34.822	45.624	9	2.6	MN	0.2	260
1084	132425	2018/01/21 19:40:53.2	33.861	45.837	18.5	2.7	MN	0.5	241
1085	132436	2018/01/21 22:39:06.6	33.741	45.587	19.4	2.7	MN	0.1	298
1086	132454	2018/01/22 05:51:54.1	33.803	45.672	8.7	3.6	MN	0.2	237
1087	132472	2018/01/22 12:28:23.6	33.719	45.801	9.1	3.4	MN	0.5	251
1088	132478	2018/01/22 13:54:33.1	34.57	45.679	9	3.2	MN	0.4	125
1089	132482	2018/01/22 15:16:26.0	34.64	45.729	17	2.9	MN	0.4	138
1090	132489	2018/01/22 17:37:40.8	33.655	45.689	10	2.6	MN	0.3	295
1091	132497	2018/01/22 20:43:32.9	33.705	46.216	20	2.7	MN	0.4	230
1092	132498	2018/01/22 20:45:03.9	33.852	45.71	12.8	3.3	MN	0.3	251
1093	132499	2018/01/22 21:46:12.3	34.517	45.853	8	3.5	MN	0.4	143
1094	132500	2018/01/22 21:48:42.1	34.536	45.877	8	3.3	MN	0.4	142
1095	132508	2018/01/23 02:03:25.3	33.696	45.72	7.7	3.4	MN	0.3	215
1096	132509	2018/01/23 02:11:59.3	33.776	45.775	10	2.7	MN	0.5	250
1097	132512	2018/01/23 03:37:58.3	34.847	45.602	8.5	2.6	MN	0.1	281
1098	132511	2018/01/23 03:45:13.4	33.566	46.853	11.1	4.4	MN	0.5	167
1099	132516	2018/01/23 08:02:46.0	34.422	45.781	6	2.9	MN	0.4	142
1100	132520	2018/01/23 13:07:21.6	33.69	45.532	10	2.9	MN	0.6	299
No.	Event ID	Origin Time	Lat.	Long.	Depth(km)	Mag.	Mag. Type	RMS(sec)	Azimuthal Gap (deg)
1101	132529	2018/01/23 18:31:32.0	34.818	45.23	8.4	3.1	MN	0.4	223
1102	132531	2018/01/23 19:41:58.8	34.835	45.232	10	2.7	MN	0.4	223
1103	132532	2018/01/23 19:46:39.7	34.88	45.137	12.1	2.6	MN	0	316
1104	132540	2018/01/24 01:40:38.4	33.791	45.617	10	2.6	MN	0.2	250
1105	132545	2018/01/24 05:21:15.5	33.786	45.765	16.6	2.8	MN	0.4	236
1106	132546	2018/01/24 07:39:19.4	35.116	45.569	11	2.8	MN	0.3	186
1107	132564	2018/01/24 12:32:24.6	33.778	45.723	14.3	2.5	MN	0.1	280
1108	132568	2018/01/24 13:36:27.5	33.736	45.689	11.5	3	MN	0.5	250
1109	132577	2018/01/24 16:52:17.4	34.848	45.709	8	2.9	MN	0.3	250
1110	132582	2018/01/24 22:07:31.9	33.773	45.693	12.7	2.8	MN	0.3	244
1111	132583	2018/01/24 23:41:42.8	34.519	46.082	7.9	2.5	MN	0.3	146
1112	132588	2018/01/25 02:51:52.6	33.707	45.685	8.7	2.5	MN	0.2	253
1113	132589	2018/01/25 03:19:13.3	34.595	46.195	8	3.9	MN	0.4	81
1114	132591	2018/01/25 03:50:26.0	33.6	46.814	10	2.5	MN	0.3	178
1115	132599	2018/01/25 09:41:26.5	33.727	45.621	8	3.4	MN	0.3	250
1116	132604	2018/01/25 12:13:50.5	34.545	45.551	12.4	3.4	MN	0.4	209
1117	132606	2018/01/25 12:20:51.7	33.73	45.669	10	2.6	MN	0.5	288
1118	132611	2018/01/25 14:57:54.1	33.736	45.725	10	2.5	MN	0.5	285
1119	132634	2018/01/26 04:56:33.3	33.687	45.704	12.2	3.4	MN	0.3	246
1120	132649	2018/01/26 10:04:08.8	33.572	46.197	17.1	2.5	MN	0	276
No.	Event ID	Origin Time	Lat.	Long.	Depth(km)	Mag.	Mag. Type	RMS(sec)	Azimuthal Gap (deg)
1121	132675	2018/01/26 20:17:34.4	33.675	45.611	8	4.4	MN	0.4	192
1122	132679	2018/01/26 21:12:58.0	33.674	45.578	8.6	3.9	MN	0.5	217
1123	132689	2018/01/26 23:38:40.0	33.701	45.645	8	3.3	MN	0.4	250
1124	132702	2018/01/27 05:24:35.2	33.715	45.703	12	2.6	MN	0.5	288
1125	132703	2018/01/27 05:38:15.7	33.769	45.682	12.5	3	MN	0.3	246
1126	132708	2018/01/27 09:31:19.2	33.825	45.638	8	2.8	MN	0.5	244
1127	132711	2018/01/27 09:55:42.9	34.808	45.81	10	2.5	MN	0.3	232
1128	132720	2018/01/27 13:55:31.5	33.706	45.622	12	2.7	MN	0.4	293
1129	132727	2018/01/27 21:30:48.0	34.042	46.401	10	2.6	MN	0.4	104
1130	132728	2018/01/28 00:08:57.5	34.645	46.255	10	2.5	MN	0.2	167
1131	132731	2018/01/28 04:07:09.0	33.799	45.74	12.2	3.6	MN	0.2	232
1132	132737	2018/01/28 05:24:23.8	34.426	45.824	10	2.6	MN	0.4	134
1133	132742	2018/01/28 08:38:42.5	33.688	45.698	10	2.7	MN	0.4	291
1134	132750	2018/01/28 10:13:04.7	34.842	45.596	8	3.3	MN	0.3	175
1135	132753	2018/01/28 10:47:47.3	33.761	45.643	10	2.5	MN	0.4	287
1136	132755	2018/01/28 11:28:24.2	33.797	45.696	10	2.6	MN	0.5	280
1137	132771	2018/01/28 21:29:29.6	34.597	46.801	10	2.5	MN	0.6	95
1138	132775	2018/01/29 00:13:04.0	34.494	46.005	12	2.8	MN	0.5	145
1139	132779	2018/01/29 02:58:42.6	33.731	45.701	8	2.5	MN	0.4	297
1140	132783	2018/01/29 06:12:47.7	34.458	45.827	5	2.6	MN	0.5	125
No.	Event ID	Origin Time	Lat.	Long.	Depth(km)	Mag.	Mag. Type	RMS(sec)	Azimuthal Gap (deg)
1141	132806	2018/01/29 13:08:58.8	33.646	45.675	10	2.8	MN	0.4	296
1142	132809	2018/01/29 15:58:46.8	33.669	45.658	14.9	2.7	MN	0.4	261
1143	132821	2018/01/29 18:00:17.8	33.529	46.168	11.4	3.1	MN	0.4	226
1144	132822	2018/01/29 18:01:49.5	33.519	46.16	8	2.9	MN	0.3	245
1145	132832	2018/01/29 23:29:17.3	33.744	45.787	8	3.1	MN	0.4	239
1146	132835	2018/01/29 23:52:53.7	33.749	45.67	10	2.6	MN	0.5	259
1147	132839	2018/01/30 01:43:31.1	34.582	45.703	10	2.5	MN	0.2	201
1148	132854	2018/01/30 08:42:38.2	34.728	45.869	6	2.7	MN	0.5	212
1149	132885	2018/01/30 23:06:45.6	33.906	46.265	10	2.5	MN	0.3	127
1150	132889	2018/01/31 00:15:09.7	33.685	45.55	8	2.7	MN	0.4	266
1151	132896	2018/01/31 03:17:57.9	33.757	45.791	11.6	2.6	MN	0.4	236
1152	132898	2018/01/31 04:04:03.1	33.602	45.608	8	3.5	MN	0.4	244
1153	132905	2018/01/31 05:41:18.6	33.694	45.727	12.4	2.6	MN	0.4	288
1154	132927	2018/01/31 13:36:10.9	33.754	45.77	12	2.9	MN	0.9	279
1155	132932	2018/01/31 14:54:52.1	33.727	45.628	12	2.6	MN	0.8	291
1156	132929	2018/01/31 14:56:23.1	33.801	45.713	9	3.5	MN	0.4	234
1157	132930	2018/01/31 14:59:36.4	33.74	45.607	8.4	3.1	MN	0.3	256
1158	132934	2018/01/31 15:18:49.0	33.752	45.346	10	2.7	MN	0.5	302
1159	132938	2018/01/31 16:00:46.2	33.72	45.621	9.2	3.3	MN	0.4	256
1160	132939	2018/01/31 16:17:50.8	33.746	45.68	7.5	3.2	MN	0.3	249
No.	Event ID	Origin Time	Lat.	Long.	Depth(km)	Mag.	Mag. Type	RMS(sec)	Azimuthal Gap (deg)
1161	132942	2018/01/31 16:27:35.5	33.751	45.536	8	2.5	MN	0.2	293
1162	132941	2018/01/31 17:53:24.8	33.702	45.714	12.2	3.5	MN	0.2	236
1163	132943	2018/01/31 17:56:26.8	33.705	45.742	8	2.7	MN	0.4	286
1164	132944	2018/01/31 18:12:23.0	33.677	45.706	10.7	3.3	MN	0.2	256
1165	132947	2018/01/31 19:07:49.2	33.74	45.789	10	2.5	MN	0.5	279
1166	132957	2018/01/31 20:17:20.5	33.737	45.759	10	2.6	MN	0.3	281
1167	132956	2018/01/31 20:28:37.9	33.69	45.573	8	2.5	MN	0.5	264
1168	132950	2018/01/31 21:29:09.8	33.784	45.703	8	3.9	MN	0.3	192
1169	132954	2018/01/31 21:47:06.2	33.815	45.713	10	2.8	MN	0.6	237
1170	132952	2018/01/31 23:44:20.9	35.001	45.947	10	2.8	MN	0.3	284
1171	132961	2018/02/01 03:29:35.9	33.674	45.707	7.5	3.6	MN	0.3	216
1172	132973	2018/02/01 08:47:37.0	33.81	45.628	8	2.7	MN	0.4	284
1173	132976	2018/02/01 09:32:16.0	33.731	45.678	12.1	2.9	MN	0.2	288
1174	132977	2018/02/01 10:02:19.2	33.73	45.785	7.3	3.1	MN	0.3	241
1175	132979	2018/02/01 11:07:31.9	34.726	45.66	8	3.5	MN	0.3	159
1176	132980	2018/02/01 11:19:06.3	34.79	45.685	8	2.5	MN	0.5	247
1177	132997	2018/02/01 20:14:49.9	34.659	45.518	8.4	3.8	MN	0.5	193
1178	133006	2018/02/01 23:21:42.9	33.763	45.741	10	2.7	MN	0.3	241
1179	133012	2018/02/02 00:49:14.6	34.639	45.535	14.5	3.1	MN	0.3	196
1180	133018	2018/02/02 02:33:29.0	34.867	45.884	8	2.6	MN	0.5	132
No.	Event ID	Origin Time	Lat.	Long.	Depth(km)	Mag.	Mag. Type	RMS(sec)	Azimuthal Gap (deg)
1181	133027	2018/02/02 05:25:46.9	33.832	45.594	8	2.5	MN	0.4	285
1182	133032	2018/02/02 09:10:50.7	34.602	46.767	10	2.7	MN	0.5	100
1183	133033	2018/02/02 09:42:57.0	34.798	45.757	8	4	MN	0.2	146
1184	133045	2018/02/02 17:17:22.3	34.805	45.787	1.8	2.8	MN	0.4	149
1185	136531	2018/02/03 02:28:40.8	34.627	46.238	6	3.1	MN	0.5	81
1186	133089	2018/02/03 09:58:08.8	34.636	46.378	7.8	2.5	MN	0.3	178
1187	133093	2018/02/03 14:35:33.0	34.852	45.761	8	2.5	MN	0.6	244
1188	133095	2018/02/03 15:57:15.7	33.661	45.578	8	2.7	MN	0.4	299
1189	133104	2018/02/03 18:27:07.8	33.687	45.66	8	2.5	MN	0.4	293
1190	133123	2018/02/04 00:32:18.0	33.537	45.703	11.5	2.9	MN	0.3	276
1191	133126	2018/02/04 02:02:06.2	33.715	45.689	11.2	2.9	MN	0.3	252
1192	133133	2018/02/04 07:53:35.5	34.737	46.248	8	2.6	MN	0.4	101
1193	133153	2018/02/04 14:20:59.4	33.67	45.705	10.6	3.5	MN	0.2	257
1194	133156	2018/02/04 16:07:21.4	34.606	46.503	10	2.5	MN	0.5	120
1195	133160	2018/02/04 17:03:04.7	34.611	46.457	13	2.7	MN	0.2	86
1196	133181	2018/02/05 02:34:24.7	34.415	45.808	8	3.1	MN	0.5	140
1197	133182	2018/02/05 03:07:21.3	34.408	45.808	8	2.8	MN	0.5	141
1198	133226	2018/02/05 21:32:44.7	33.641	45.845	9.4	3.6	MN	0.4	239
1199	133228	2018/02/05 23:22:37.9	34.507	45.91	6	2.9	MN	0.4	106
1200	133232	2018/02/06 00:00:25.0	35.48	45.472	5	2.5	MN	0.5	198
No.	Event ID	Origin Time	Lat.	Long.	Depth(km)	Mag.	Mag. Type	RMS(sec)	Azimuthal Gap (deg)
1201	133238	2018/02/06 03:54:41.4	33.599	45.857	11.6	3.2	MN	0.4	240
1202	133252	2018/02/06 09:15:03.9	34.77	45.808	8	2.7	MN	0.5	226
1203	133262	2018/02/06 12:28:25.3	33.625	45.823	11.2	3.6	MN	0.6	231
1204	133264	2018/02/06 12:45:33.7	33.731	45.689	10	2.7	MN	0.4	250
1205	133268	2018/02/06 14:49:06.4	33.647	45.848	10	2.9	MN	0.4	252
1206	133361	2018/02/08 12:49:53.9	34.572	46.828	8	3.5	MN	0.6	60
1207	133382	2018/02/09 01:38:43.9	35.233	45.263	10	2.7	MN	0.4	302
1208	133387	2018/02/09 04:07:50.5	33.574	45.723	10	2.5	MN	0.5	295
1209	133408	2018/02/09 15:29:42.8	34.639	45.771	8	2.6	MN	0.6	214
1210	133422	2018/02/09 23:38:42.8	34.536	45.715	8	2.7	MN	0.5	99
1211	133425	2018/02/10 03:02:44.9	34.829	45.863	19.5	3.6	MN	0.3	132
1212	133435	2018/02/10 06:42:14.0	33.751	45.529	13.7	2.8	MN	0.3	301
1213	133445	2018/02/10 17:41:22.6	33.708	45.707	8	3.6	MN	0.5	216
1214	133449	2018/02/10 19:10:05.9	33.683	45.698	10	2.7	MN	0.4	256
1215	133451	2018/02/10 20:44:57.6	34.723	45.615	10	2.7	MN	0.3	254
1216	133483	2018/02/11 12:53:54.0	33.659	45.685	10	2.9	MN	0.3	261
1217	133491	2018/02/11 21:15:05.2	34.001	46.374	8.3	2.6	MN	0.2	108
1218	133519	2018/02/12 15:17:12.7	33.773	45.569	8	2.5	MN	0.2	291
1219	133546	2018/02/13 09:53:20.1	34.851	45.882	10	2.5	MN	0.4	230
1220	133555	2018/02/13 12:49:07.2	34.504	45.683	8	2.8	MN	0.5	119
No.	Event ID	Origin Time	Lat.	Long.	Depth(km)	Mag.	Mag. Type	RMS(sec)	Azimuthal Gap (deg)
1221	133557	2018/02/13 14:07:57.7	34.646	46.254	8	3	MN	0.5	82
1222	133569	2018/02/13 19:29:10.9	35.207	45.562	10	2.5	MN	0.3	186
1223	133573	2018/02/14 00:46:02.5	34.69	46.099	6	2.7	MN	0.5	185
1224	133574	2018/02/14 00:48:45.8	35.02	45.553	12	2.8	MN	0.5	278
1225	133582	2018/02/14 04:50:47.0	35.098	45.904	9.3	2.8	MN	0.3	151
1226	133608	2018/02/14 23:43:30.6	33.761	45.616	10	2.5	MN	0.6	289
1227	133617	2018/02/15 03:42:42.4	33.622	45.791	10	2.5	MN	0.3	291
1228	133647	2018/02/16 05:56:41.2	34.557	46.243	8	3.5	MN	0.4	83
1229	133672	2018/02/16 18:21:20.1	33.537	45.608	16.6	2.7	MN	0.3	276
1230	133671	2018/02/16 18:22:00.1	33.634	45.699	12.2	4	MN	0.3	216
1231	133673	2018/02/16 20:09:58.5	33.758	45.901	14.7	2.7	MN	0.2	243
1232	133675	2018/02/16 21:03:10.0	34.821	45.838	5	2.6	MN	0.4	144
1233	133679	2018/02/16 22:39:19.7	34.585	45.68	8	3	MN	0.3	130
1234	133682	2018/02/17 00:11:55.0	34.644	46.263	11.2	2.8	MN	0.4	165
1235	133686	2018/02/17 03:21:19.6	34.888	45.729	10	2.7	MN	0.3	251
1236	133725	2018/02/18 00:23:52.2	34.792	45.599	10	2.8	MN	0.5	174
1237	133737	2018/02/18 05:03:47.8	33.618	45.663	8	3.3	MN	0.4	264
1238	133750	2018/02/18 18:26:40.5	33.669	45.646	8	3.2	MN	0.4	262
1239	133753	2018/02/18 18:39:40.3	34.673	45.742	11.5	2.8	MN	0.1	142
1240	133760	2018/02/18 22:25:08.0	34.471	45.409	12.7	3.1	MN	0.3	220
No.	Event ID	Origin Time	Lat.	Long.	Depth(km)	Mag.	Mag. Type	RMS(sec)	Azimuthal Gap (deg)
1241	133779	2018/02/19 07:19:41.9	34.475	45.254	10	2.9	MN	0.4	295
1242	133783	2018/02/19 09:05:24.7	33.767	45.787	8	2.6	MN	0.4	235
1243	133798	2018/02/19 11:02:00.9	34.394	45.373	13.4	4.3	MN	0.3	216
1244	133799	2018/02/19 11:49:28.6	34.517	45.302	17	2.8	MN	0.4	293
1245	133808	2018/02/19 14:43:14.8	34.482	45.362	16.6	2.5	MN	0.2	291
1246	133821	2018/02/19 20:46:56.6	34.551	46.07	10	2.7	MN	0.1	156
1247	133829	2018/02/20 00:05:14.5	33.75	45.747	10.7	2.6	MN	0.3	242
1248	133839	2018/02/20 09:11:13.4	33.688	45.667	11.7	3	MN	0.3	257
1249	133865	2018/02/20 23:07:00.5	33.695	45.749	8	2.9	MN	0.3	251
1250	133890	2018/02/21 10:53:10.2	34.641	46.221	10	2.5	MN	0.2	244
1251	133899	2018/02/21 19:56:52.1	34.523	45.953	10	2.6	MN	0.5	157
1252	133902	2018/02/21 23:36:03.0	34.176	46.67	6	2.6	MN	0.7	116
1253	133942	2018/02/23 00:18:07.5	34.413	46.108	10	2.5	MN	0.4	108
1254	133944	2018/02/23 01:23:08.6	33.804	45.628	10	2.9	MN	0.3	247
1255	133946	2018/02/23 02:06:06.4	33.879	45.61	10	2.7	MN	0.5	258
1256	134002	2018/02/24 12:43:47.5	34.697	46.199	10	2.5	MN	0.1	250
1257	134008	2018/02/24 16:26:35.8	34.023	45.066	17.9	4.1	MN	0.5	197
1258	134018	2018/02/24 18:09:44.3	34.103	45.11	24.8	3	MN	0.2	253
1259	134013	2018/02/24 23:29:53.4	34.901	45.864	10	2.5	MN	0.5	239
1260	134063	2018/02/26 13:44:41.3	33.986	45.708	8	3.2	MN	0.3	218
No.	Event ID	Origin Time	Lat.	Long.	Depth(km)	Mag.	Mag. Type	RMS(sec)	Azimuthal Gap (deg)
1261	134064	2018/02/26 13:59:35.3	34.458	45.41	13.3	2.7	MN	0.4	289
1262	134100	2018/02/27 13:00:16.4	34.179	46.648	10	2.7	MN	0.5	91
1263	134106	2018/02/27 16:44:25.9	34.873	45.852	10	2.6	MN	0.3	236
1264	134112	2018/02/28 00:18:58.4	34.814	45.873	8	2.9	MN	0.2	226
1265	134134	2018/02/28 10:29:56.2	34.053	45.098	18.4	3.8	MN	0.4	253
1266	134153	2018/02/28 21:24:13.9	34.641	45.541	13.3	2.9	MN	0.5	272
1267	134155	2018/02/28 23:50:18.2	34.337	45.426	10	2.9	MN	0.8	225
1268	134158	2018/03/01 00:15:59.3	34.366	45.512	10.7	3.5	MN	0.3	217
1269	134164	2018/03/01 06:15:39.4	34.605	46.359	8	3.8	MN	0.4	74
1270	134169	2018/03/01 07:13:40.9	34.623	46.368	8	2.6	MN	0.2	183
1271	134198	2018/03/01 22:44:20.6	34.626	46.345	10	2.5	MN	0.2	126
1272	134226	2018/03/03 06:50:12.2	34.248	45.976	8	3.3	MN	0.4	146
1273	134230	2018/03/03 09:44:48.1	34.544	45.798	8.8	2.6	MN	0.3	170
1274	134231	2018/03/03 10:18:03.6	34.692	45.775	11.2	3.1	MN	0.5	131
1275	134239	2018/03/03 13:38:47.1	34.377	45.642	7.5	3.6	MN	0.4	193
1276	134255	2018/03/03 21:56:06.0	34.199	46.652	8.4	3.3	MN	0.4	89
1277	134258	2018/03/03 23:35:08.9	33.554	46.849	8	3.5	MN	0.4	135
1278	134259	2018/03/04 00:41:04.6	34.233	46.678	10	2.8	MN	0.3	178
1279	134260	2018/03/04 00:41:53.2	33.692	45.737	10	2.9	MN	0.3	251
1280	134264	2018/03/04 03:14:58.7	33.765	46.038	10	2.8	MN	0.4	242
No.	Event ID	Origin Time	Lat.	Long.	Depth(km)	Mag.	Mag. Type	RMS(sec)	Azimuthal Gap (deg)
1281	134372	2018/03/06 17:59:46.8	34.906	46.217	10	2.5	MN	0.4	251
1282	134373	2018/03/06 19:22:27.4	34.68	45.498	10	2.5	MN	0.4	291
1283	134374	2018/03/06 19:41:23.4	34.639	45.499	13.5	2.6	MN	0.3	294
1284	134436	2018/03/07 19:01:06.8	34.155	46.666	8	3.7	MN	0.5	76
1285	134441	2018/03/07 20:13:57.8	33.656	45.638	8	3.3	MN	0.4	263
1286	134443	2018/03/07 23:32:38.8	34.949	46.229	10	2.7	MN	0.4	223
1287	134452	2018/03/08 04:33:15.8	34.855	46.376	7.2	3.3	MN	0.2	102
1288	134472	2018/03/08 17:56:55.7	34.815	45.738	10	2.7	MN	0.3	260
1289	134475	2018/03/08 22:55:33.4	34.888	46.232	10	2.6	MN	0.2	213
1290	134523	2018/03/10 06:27:40.8	33.741	45.765	9.4	3.2	MN	0.3	242
1291	134536	2018/03/10 12:40:12.1	34.34	45.62	7.6	2.6	MN	0.3	206
1292	134565	2018/03/11 09:37:25.6	34.678	45.405	9.9	2.5	MN	0.4	301
1293	134564	2018/03/11 09:48:57.3	34.622	45.424	7.5	3.7	MN	0.5	215
1294	134571	2018/03/11 10:16:44.2	34.613	45.512	12.3	3.2	MN	0.3	210
1295	134576	2018/03/11 12:24:51.3	34.615	46.435	8	3	MN	0.6	72
1296	134578	2018/03/11 14:07:51.2	34.618	45.444	7.9	3.3	MN	0.5	214
1297	134644	2018/03/13 07:15:29.7	33.722	45.739	8	2.5	MN	0.4	285
1298	134660	2018/03/13 18:44:13.8	34.6	46.037	10	2.7	MN	0.2	171
1299	134703	2018/03/14 23:45:32.2	33.788	45.704	10.6	3	MN	0.3	241
1300	134721	2018/03/15 09:45:32.7	34.449	45.77	8	3.2	MN	0.5	135
No.	Event ID	Origin Time	Lat.	Long.	Depth(km)	Mag.	Mag. Type	RMS(sec)	Azimuthal Gap (deg)
1301	134741	2018/03/15 17:42:03.3	34.563	45.83	7.3	2.8	MN	0.3	96
1302	134762	2018/03/16 05:16:01.2	34.257	46.733	10	2.5	MN	0.4	119
1303	134790	2018/03/16 15:58:48.4	34.073	46.324	11.1	2.9	MN	0.3	114
1304	134791	2018/03/16 16:01:24.6	34.592	46.036	10	2.7	MN	0.4	173
1305	134800	2018/03/16 17:49:40.2	34.111	46.33	11.6	2.6	MN	0.4	251
1306	134803	2018/03/16 20:55:36.1	34.644	45.463	17.4	2.5	MN	0.3	297
1307	134845	2018/03/17 19:55:13.2	34.071	46.328	7.3	2.5	MN	0.4	113
1308	134879	2018/03/18 14:04:20.9	33.72	45.694	10	2.7	MN	0.2	288
1309	134882	2018/03/18 14:28:12.4	34.524	45.223	11.9	2.8	MN	0.4	297
1310	134942	2018/03/19 10:39:04.2	34.6	45.426	16	3.6	MN	0.3	216
1311	134943	2018/03/19 10:41:50.1	34.645	45.443	11.9	3.2	MN	0.4	213
1312	134948	2018/03/19 13:51:06.7	34.089	46.298	7.6	3.1	MN	0.2	178
1313	134949	2018/03/19 13:55:03.1	34.085	46.326	11.1	3.3	MN	0.3	113
1314	134950	2018/03/19 14:09:30.0	34.068	46.324	8	2.6	MN	0.5	114
1315	134991	2018/03/20 02:27:30.9	34.352	45.754	7.8	3.7	MN	0.4	166
1316	135033	2018/03/20 18:10:07.5	33.688	45.576	8	2.7	MN	0.3	264
1317	135044	2018/03/20 21:34:27.1	33.775	45.754	8	2.8	MN	0.5	237
1318	135058	2018/03/21 03:13:30.8	34.417	45.755	6	3.4	MN	0.3	149
1319	135063	2018/03/21 07:35:50.2	34.677	45.165	17.5	4.2	MN	0.2	226
1320	135096	2018/03/22 01:52:17.2	35.404	46.441	10	2.7	MN	0.4	174
No.	Event ID	Origin Time	Lat.	Long.	Depth(km)	Mag.	Mag. Type	RMS(sec)	Azimuthal Gap (deg)
1321	135107	2018/03/22 06:40:00.5	34.661	45.639	8	3.5	MN	0.4	160
1322	135111	2018/03/22 07:39:24.0	34.718	45.759	10	2.5	MN	0.4	224
1323	135202	2018/03/23 21:22:56.5	34.614	45.472	14.8	3.4	MN	0.2	212
1324	135256	2018/03/25 09:49:24.4	34.618	46.4	10	2.5	MN	0.3	107
1325	135274	2018/03/25 23:12:55.1	33.744	45.696	8	2.9	MN	0.5	248
1326	135295	2018/03/26 13:54:36.7	33.836	45.807	10	2.6	MN	0.3	267
1327	135294	2018/03/26 13:59:37.8	33.884	45.974	8.3	3.5	MN	0.2	190
1328	135338	2018/03/28 00:27:05.8	34.491	45.497	17.4	4	MN	0.3	214
1329	135343	2018/03/28 01:19:19.9	34.472	45.413	11.3	3.7	MN	0.4	223
1330	135345	2018/03/28 01:55:29.6	34.374	45.324	7.8	3.7	MN	0.4	226
1331	135350	2018/03/28 02:59:40.7	34.549	45.344	14.2	2.8	MN	0.4	292
1332	135354	2018/03/28 04:44:15.4	34.538	45.381	11.5	3.3	MN	0.4	220
1333	135362	2018/03/28 06:23:12.5	34.544	45.389	14.1	2.8	MN	0.3	290
1334	135391	2018/03/28 12:10:08.0	34.55	45.436	13.5	3.5	MN	0.3	216
1335	135410	2018/03/28 17:38:59.5	34.522	45.453	17.9	3	MN	0.4	216
1336	135433	2018/03/29 05:23:22.0	34.041	46.036	8	3	MN	0.6	161
1337	135445	2018/03/29 08:51:49.8	34.87	46.298	10	2.6	MN	0.2	313
1338	135466	2018/03/29 18:22:09.0	34.69	45.788	6	2.7	MN	0.5	136
1339	135480	2018/03/30 08:42:35.1	33.786	45.578	10	2.9	MN	0.5	254
1340	135496	2018/03/30 21:42:54.9	33.833	45.689	8.8	3.1	MN	0.3	237
No.	Event ID	Origin Time	Lat.	Long.	Depth(km)	Mag.	Mag. Type	RMS(sec)	Azimuthal Gap (deg)
1341	135579	2018/04/01 06:18:53.2	34.647	46.422	9.3	2.5	MN	0.1	172
1342	135580	2018/04/01 06:23:42.6	34.748	46.024	10	2.6	MN	0.6	304
1343	135586	2018/04/01 08:35:25.7	34.434	45.786	7.3	5.3	MN	0.4	138
1344	135587	2018/04/01 08:57:23.9	34.438	45.8	10	2.6	MN	0.3	134
1345	135594	2018/04/01 09:30:10.0	34.429	45.792	10	2.7	MN	0.3	138
1346	135600	2018/04/01 10:21:07.5	34.407	45.8	8	2.7	MN	0.4	143
1347	135604	2018/04/01 10:58:06.6	34.426	45.8	8.3	3.3	MN	0.5	138
1348	135608	2018/04/01 11:55:23.4	34.461	45.818	10	2.5	MN	0.3	140
1349	135612	2018/04/01 12:41:42.3	34.427	45.831	8	2.5	MN	0.3	133
1350	135617	2018/04/01 13:59:53.1	34.527	45.553	10	2.8	MN	0.2	282
1351	135616	2018/04/01 14:10:55.3	34.394	45.806	0	2.5	MN	0.4	146
1352	135624	2018/04/01 16:01:24.4	34.419	45.773	9.3	3.3	MN	0.5	145
1353	135657	2018/04/02 03:03:22.9	34.388	45.821	7.2	4	MN	0.3	145
1354	135669	2018/04/02 05:46:21.2	34.427	45.789	10	2.6	MN	0.4	140
1355	135672	2018/04/02 07:08:39.2	35.175	45.829	10	2.8	MN	0.7	268
1356	135692	2018/04/02 13:23:54.0	33.669	45.653	8	3.4	MN	0.4	261
1357	135693	2018/04/02 13:38:31.1	33.635	45.693	10	2.5	MN	0.4	297
1358	135736	2018/04/03 11:48:19.1	33.828	46.529	10	2.5	MN	0.4	247
1359	135744	2018/04/03 18:03:40.1	34.483	45.804	9.2	2.9	MN	0.5	158
1360	135764	2018/04/04 06:21:25.1	34.391	45.809	11	2.6	MN	0.5	186
No.	Event ID	Origin Time	Lat.	Long.	Depth(km)	Mag.	Mag. Type	RMS(sec)	Azimuthal Gap (deg)
1361	135772	2018/04/04 10:15:46.8	34.442	45.797	11	2.5	MN	0.3	133
1362	135782	2018/04/04 21:47:00.1	34.395	45.788	9.3	3.5	MN	0.5	148
1363	135788	2018/04/04 23:16:03.8	34.461	45.809	10	2.5	MN	0.3	182
1364	135854	2018/04/06 17:27:22.4	34.38	45.779	11.2	3.1	MN	0.5	168
1365	135893	2018/04/07 08:48:54.9	34.356	45.806	7.7	3.9	MN	0.5	187
1366	135899	2018/04/07 12:28:55.1	34.083	46.309	10	2.9	MN	0.4	253
1367	135952	2018/04/08 22:51:49.6	34.428	46.621	6	2.5	MN	0.4	88
1368	135996	2018/04/09 17:47:59.7	34.738	45.753	8	2.8	MN	0.3	229
1369	136056	2018/04/11 14:33:39.2	34.412	45.895	5	2.6	MN	0.5	253
1370	136079	2018/04/12 03:17:56.4	34.754	45.762	10	2.6	MN	0.1	230
1371	136093	2018/04/12 13:01:55.8	34.45	45.778	8	2.8	MN	0.4	134
1372	136106	2018/04/13 02:57:43.6	33.777	45.693	12	2.9	MN	0.5	283
1373	136119	2018/04/13 14:29:34.5	34.349	45.608	2.9	2.8	MN	0.3	209
1374	136121	2018/04/13 19:51:00.3	34.407	45.818	6	2.6	MN	0.3	141
1375	136122	2018/04/13 19:55:04.2	34.404	45.795	6	2.9	MN	0.4	145
1376	136150	2018/04/14 23:02:42.4	33.74	45.68	8.3	2.6	MN	0.2	286
1377	136177	2018/04/15 14:49:14.9	34.065	46.284	8	2.8	MN	0.4	256
1378	136200	2018/04/16 13:51:05.4	34.81	45.908	10.5	2.8	MN	0.1	222
1379	136350	2018/04/21 00:48:16.4	34.455	45.799	8	2.7	MN	0.4	168
1380	136357	2018/04/21 04:12:29.2	34.624	46.348	7.2	3.3	MN	0.4	112
No.	Event ID	Origin Time	Lat.	Long.	Depth(km)	Mag.	Mag. Type	RMS(sec)	Azimuthal Gap (deg)
1381	136365	2018/04/21 14:07:35.6	33.84	45.722	6	3.1	MN	0.4	252
1382	136366	2018/04/21 14:18:11.3	33.641	45.571	9.4	3.5	MN	0.5	242
1383	136367	2018/04/21 14:24:31.6	33.731	45.727	24.7	2.9	MN	0.3	256
1384	136369	2018/04/21 15:35:18.6	33.691	45.539	6	3.3	MN	0.3	256
1385	136387	2018/04/22 04:13:22.6	34.915	45.7	7.5	2.7	MN	0.2	278
1386	136422	2018/04/22 17:35:29.8	33.764	45.659	12	2.5	MN	0.3	286
1387	136423	2018/04/22 17:42:37.2	33.808	45.684	9.3	3.2	MN	0.2	241
1388	136428	2018/04/22 18:48:03.1	33.831	45.65	11.5	3.5	MN	0.3	238
1389	136518	2018/04/24 20:41:56.5	34.509	45.851	10	2.5	MN	0.2	158
1390	136523	2018/04/24 23:31:32.2	33.74	45.617	8.6	2.5	MN	0.3	255
1391	136611	2018/04/27 03:04:30.5	34.381	45.54	13.9	3.2	MN	0.4	215
1392	136628	2018/04/27 15:05:14.2	34.923	45.609	10	2.6	MN	0.2	287
1393	136641	2018/04/28 01:37:44.5	33.99	46.336	4	2.6	MN	0.6	114
1394	136662	2018/04/28 18:52:51.3	33.843	45.714	23.2	2.7	MN	0.1	293
1395	136724	2018/04/30 06:32:24.2	33.593	45.796	11	2.5	MN	0.4	303
1396	136727	2018/04/30 09:01:08.4	34.621	45.711	10	2.6	MN	0.4	213
1397	136741	2018/04/30 22:13:35.9	34.868	45.838	6.4	3.9	MN	0.3	137
1398	136742	2018/04/30 22:14:49.8	34.861	45.821	8	4	MN	0.4	140
1399	136743	2018/04/30 22:25:41.1	34.865	45.822	6	3.4	MN	0.5	140
1400	136744	2018/04/30 22:41:15.3	34.836	45.844	10	2.6	MN	0.2	232
No.	Event ID	Origin Time	Lat.	Long.	Depth(km)	Mag.	Mag. Type	RMS(sec)	Azimuthal Gap (deg)
1401	136747	2018/05/01 00:34:49.6	34.592	45.73	10	2.8	MN	0.3	198
1402	136854	2018/05/04 11:46:24.7	34.623	47.439	6	3.5	MN	0.6	121
1403	136862	2018/05/04 18:17:23.8	34.656	45.611	10	2.5	MN	0.5	249
1404	136868	2018/05/04 20:55:03.5	34.618	46.23	10	2.6	MN	0.3	160
1405	136875	2018/05/05 01:56:07.6	35.272	46.649	13.2	2.7	MN	0.2	287
1406	136881	2018/05/05 07:00:45.3	34.648	47.444	6	3	MN	0.4	113
1407	136887	2018/05/05 10:49:51.4	34.552	45.773	8.9	3.8	MN	0.3	99
1408	136920	2018/05/06 03:15:04.7	34.185	45.569	7.3	2.7	MN	0.4	227
1409	136948	2018/05/06 21:16:30.8	34.636	46.307	6	3	MN	0.3	127
1410	136974	2018/05/07 16:04:08.5	34.874	45.818	8	3.7	MN	0.1	141
1411	136978	2018/05/07 17:37:08.7	34.875	45.855	8	2.6	MN	0.3	236
1412	137000	2018/05/08 09:35:01.0	34.87	45.845	8.7	2.8	MN	0.4	240
1413	137012	2018/05/08 18:52:01.2	34.851	45.867	10	2.7	MN	0.7	255
1414	137016	2018/05/08 23:50:26.4	34.484	46.589	10	2.9	MN	1	128
1415	137021	2018/05/09 05:04:57.7	34.474	46.444	8.7	2.6	MN	0.3	117
1416	137028	2018/05/09 10:37:13.5	34.843	45.713	8.4	3.6	MN	0.3	155
1417	137032	2018/05/09 16:34:03.9	34.896	45.831	8	3.2	MN	0.3	140
1418	137036	2018/05/09 17:21:40.3	34.436	45.507	11	2.5	MN	0.5	270
1419	137037	2018/05/09 19:51:38.2	34.856	45.699	10	2.5	MN	0.4	251
1420	137038	2018/05/09 20:55:23.9	34.035	46.157	28	2.9	MN	0.4	182
No.	Event ID	Origin Time	Lat.	Long.	Depth(km)	Mag.	Mag. Type	RMS(sec)	Azimuthal Gap (deg)
1421	137141	2018/05/12 09:55:17.8	34.556	46.154	11	2.6	MN	0.2	149
1422	137150	2018/05/12 17:11:32.1	34.345	45.69	8.5	3.3	MN	0.2	183
1423	137154	2018/05/12 19:26:22.6	34.912	45.826	10	2.9	MN	0.3	243
1424	137180	2018/05/13 09:47:37.5	34.607	46.306	6	3.2	MN	0.5	76
1425	137186	2018/05/13 13:13:40.7	34.704	46.066	14.4	2.7	MN	0.1	259
1426	137210	2018/05/14 06:44:55.3	34.643	46.289	6.7	2.5	MN	0.4	204
1427	137211	2018/05/14 07:06:14.6	34.63	45.755	10.8	2.9	MN	0.2	205
1428	137227	2018/05/14 19:22:56.6	34.938	45.931	7.2	2.5	MN	0.4	141
1429	137274	2018/05/16 09:38:03.5	34.658	47.435	19.8	2.9	MN	0.2	94
1430	137295	2018/05/16 21:21:09.8	35.176	45.682	10	2.9	MN	0.7	174
1431	137397	2018/05/19 17:15:44.8	34.516	46.264	0	2.7	MN	0.3	173
1432	137485	2018/05/21 11:54:55.9	34.936	45.797	10	2.9	MN	0.6	249
1433	137488	2018/05/21 12:21:30.8	34.902	45.836	8	3	MN	0.5	140
1434	137511	2018/05/22 00:31:53.1	34.83	45.879	11.7	4.4	MN	0.3	129
1435	137512	2018/05/22 00:36:00.0	34.862	45.872	8.2	3.7	MN	0.3	133
1436	137513	2018/05/22 00:43:49.7	34.838	45.853	10	2.7	MN	0.4	134
1437	137538	2018/05/22 10:51:53.5	34.906	45.824	10	2.7	MN	0.2	243
1438	137623	2018/05/24 05:18:31.2	33.878	45.567	14.1	2.5	MN	0.3	299
1439	137633	2018/05/24 08:56:30.0	33.71	46.539	8.3	2.8	MN	0.4	209
1440	137656	2018/05/25 00:30:22.6	33.729	45.743	10	2.5	MN	0.4	313
No.	Event ID	Origin Time	Lat.	Long.	Depth(km)	Mag.	Mag. Type	RMS(sec)	Azimuthal Gap (deg)
1441	137669	2018/05/25 10:49:57.9	34.989	45.81	10	2.9	MN	0.2	280
1442	137668	2018/05/25 14:52:25.7	33.727	45.623	8	3.5	MN	0.3	222
1443	137688	2018/05/26 04:50:52.3	33.757	45.725	10	2.9	MN	0.3	286
1444	137690	2018/05/26 05:08:26.4	33.741	45.586	8	2.9	MN	0.4	264
1445	137897	2018/05/30 13:58:43.4	34.675	45.794	8.3	3.2	MN	0.2	125
1446	137907	2018/05/30 19:23:52.1	34.641	46.177	8	2.7	MN	0.4	224
1447	137908	2018/05/30 21:19:46.4	34.891	45.832	10	2.5	MN	0.2	240
1448	137920	2018/05/31 09:05:56.4	33.726	45.607	10	2.8	MN	0.4	305
1449	137925	2018/05/31 12:01:28.3	34.903	46.084	8	2.9	MN	0.4	226
1450	137933	2018/05/31 19:02:02.4	35.092	45.962	10	2.5	MN	0.1	315
1451	137965	2018/06/01 17:41:05.7	34.438	45.816	10	2.6	MN	0.4	131
1452	137981	2018/06/02 02:41:41.2	34.489	45.787	9.2	2.6	MN	0.3	150
1453	138071	2018/06/04 04:40:07.4	34.621	45.595	13.2	3	MN	0.4	252
1454	138092	2018/06/04 20:25:53.3	34.45	46.571	8.2	3.1	MN	0.3	55
1455	138113	2018/06/06 00:07:06.1	34.428	45.979	8	3.9	MN	0.3	94
1456	138179	2018/06/07 18:56:30.7	35.309	45.727	12	2.6	MN	0.5	174
1457	138189	2018/06/08 04:57:51.7	34.415	45.67	9.3	3.3	MN	0.3	174
1458	138206	2018/06/08 22:19:14.4	33.672	45.653	11.2	2.9	MN	0.4	260
1459	138212	2018/06/09 02:54:23.0	34.814	47.325	8	2.9	MN	0.6	98
1460	138255	2018/06/10 12:25:53.5	34.606	46.481	7.6	2.6	MN	0.5	92
No.	Event ID	Origin Time	Lat.	Long.	Depth(km)	Mag.	Mag. Type	RMS(sec)	Azimuthal Gap (deg)
1461	138290	2018/06/11 15:11:10.1	34.714	45.768	18	2.5	MN	0.3	223
1462	138354	2018/06/13 19:20:16.8	34.445	45.824	5	2.7	MN	0.5	133
1463	138366	2018/06/14 00:06:36.4	33.766	45.682	10	2.5	MN	0.5	292
1464	138465	2018/06/17 18:59:48.1	33.644	45.773	8	2.5	MN	0.6	310
1465	138524	2018/06/19 08:37:06.4	34.621	46.211	11	2.8	MN	0.3	216
1466	138542	2018/06/19 20:12:43.7	33.766	45.758	12.8	2.7	MN	0.4	252
1467	138566	2018/06/20 18:47:26.3	33.642	45.674	9	3.8	MN	0.3	219
1468	138576	2018/06/21 08:05:50.2	34.656	46.235	11.6	2.6	MN	0.2	286
1469	138582	2018/06/21 15:12:50.3	35.105	46.842	10	2.8	MN	0.2	248
1470	138641	2018/06/23 21:37:48.2	34.442	45.993	6	4	MN	0.4	89
1471	138683	2018/06/25 15:50:58.6	34.911	45.866	10	2.6	MN	0.4	239
1472	138689	2018/06/25 18:22:11.1	35.479	46.116	10	2.6	MN	0.4	159
1473	138691	2018/06/25 20:53:54.4	35.452	46.3	9	3.2	MN	0.6	128
1474	138699	2018/06/26 03:56:05.3	34.452	45.63	13.7	2.5	MN	0.3	183
1475	138717	2018/06/26 15:31:45.3	34.627	46.267	8.8	3	MN	0.2	79
1476	138722	2018/06/26 17:57:03.5	34.618	46.268	8	4.8	MN	0.4	79
1477	138725	2018/06/26 18:19:42.8	34.677	46.22	9.4	2.5	MN	0.3	223
1478	138736	2018/06/26 22:13:05.9	34.546	45.641	14.1	4.1	MN	0.4	129
1479	138738	2018/06/26 22:22:07.2	34.58	45.656	8.7	3.5	MN	0.3	138
1480	138739	2018/06/26 22:35:45.6	34.646	46.254	8	2.5	MN	0.3	168
No.	Event ID	Origin Time	Lat.	Long.	Depth(km)	Mag.	Mag. Type	RMS(sec)	Azimuthal Gap (deg)
1481	138745	2018/06/26 23:20:49.8	34.618	46.262	8.3	2.7	MN	0.2	153
1482	138742	2018/06/27 00:04:25.0	34.629	46.282	8	3.5	MN	0.4	79
1483	138754	2018/06/27 04:01:27.8	34.647	46.239	7.2	2.9	MN	0.5	170
1484	138769	2018/06/27 19:29:19.5	34.503	45.803	9.3	3.3	MN	0.2	104
1485	138771	2018/06/27 21:44:30.2	34.645	46.259	7.4	2.6	MN	0.4	166
1486	138784	2018/06/28 05:19:51.3	34.618	46.239	8	2.5	MN	0.4	207
1487	138799	2018/06/28 20:13:01.3	34.454	45.987	5	2.8	MN	0.4	134
1488	138810	2018/06/29 03:23:21.9	34.769	45.631	8	2.7	MN	0.3	254
1489	138846	2018/06/30 06:08:06.1	34.614	46.172	8	3.7	MN	0.4	82
1490	138896	2018/07/01 18:04:38.4	34.597	46.285	6.1	3.3	MN	0.4	76
1491	138931	2018/07/03 11:58:35.9	34.64	46.238	9.9	2.5	MN	0	217
1492	138936	2018/07/03 21:46:33.6	34.405	45.629	10.9	3.6	MN	0.3	201
1493	138982	2018/07/05 08:38:44.9	34.42	45.615	9.8	3.4	MN	0.4	205
1494	138984	2018/07/05 08:41:37.9	34.45	45.623	10	2.6	MN	0.4	189
1495	138993	2018/07/05 13:45:16.5	34.434	45.458	11.2	2.5	MN	0.4	287
1496	138995	2018/07/05 14:50:06.0	34.439	45.625	9.2	3.2	MN	0.4	192
1497	138998	2018/07/05 17:11:13.2	34.456	45.624	11.3	2.5	MN	0.5	185
1498	138999	2018/07/05 17:16:53.5	34.424	45.65	10.8	3.6	MN	0.4	183
1499	139000	2018/07/05 17:28:42.2	33.776	45.657	13.9	2.5	MN	0.3	295
1500	139005	2018/07/05 19:07:34.4	33.724	45.702	13.6	3.2	MN	0.3	250
No.	Event ID	Origin Time	Lat.	Long.	Depth(km)	Mag.	Mag. Type	RMS(sec)	Azimuthal Gap (deg)
1501	139008	2018/07/05 19:12:03.6	33.778	45.643	10	2.5	MN	0.2	296
1502	139009	2018/07/05 19:14:34.8	34.439	45.644	10	2.6	MN	0.5	180
1503	139012	2018/07/05 22:38:12.2	34.433	45.616	10	2.6	MN	0.4	200
1504	139027	2018/07/06 10:08:27.0	33.784	45.739	10	2.6	MN	0.4	252
1505	139040	2018/07/06 17:25:30.3	34.636	46.256	7.9	2.6	MN	0.4	163
1506	139078	2018/07/07 21:39:35.9	34.796	45.211	9.7	3.6	MN	0.5	221
1507	139102	2018/07/08 10:51:31.6	34.609	46.265	8	3.3	MN	0.3	78
1508	139111	2018/07/08 15:14:49.1	34.504	45.918	8	2.6	MN	0.4	153
1509	139112	2018/07/08 15:52:32.7	34.501	45.909	8	2.5	MN	0.3	152
1510	139116	2018/07/08 16:46:35.3	34.511	45.914	8.2	3.2	MN	0.4	89
1511	139117	2018/07/08 16:50:10.1	34.503	45.93	8	2.6	MN	0.4	151
1512	139120	2018/07/08 19:17:22.1	34.52	45.909	10	2.5	MN	0.1	158
1513	139144	2018/07/09 18:30:54.6	34.181	45.765	8	2.5	MN	0.6	190
1514	139198	2018/07/11 05:26:01.0	34.093	46.495	11	2.5	MN	0.5	91
1515	139224	2018/07/12 10:17:52.6	34.14	46.395	12.5	3	MN	0.4	73
1516	139223	2018/07/12 10:32:10.9	34.613	46.262	7.2	3.3	MN	0.3	79
1517	139227	2018/07/12 13:17:20.8	34.588	45.903	8	3.1	MN	0.5	95
1518	139240	2018/07/13 03:00:32.2	33.808	45.713	12.4	3.3	MN	0.3	238
1519	139251	2018/07/13 09:26:30.4	34.405	46.561	7.2	2.5	MN	0.1	92
1520	139290	2018/07/14 17:50:16.0	34.584	45.799	8.8	3.3	MN	0.4	105
No.	Event ID	Origin Time	Lat.	Long.	Depth(km)	Mag.	Mag. Type	RMS(sec)	Azimuthal Gap (deg)
1521	139291	2018/07/14 18:59:42.3	34.664	45.798	10	2.6	MN	0.8	207
1522	139307	2018/07/15 07:10:59.3	34.614	46.278	8.3	4.6	MN	0.4	78
1523	139308	2018/07/15 07:16:43.5	34.727	46.229	19	2.6	MN	0.4	229
1524	139320	2018/07/15 13:40:16.2	34.932	45.866	13.1	3.6	MN	0.3	138
1525	139322	2018/07/15 15:43:59.0	33.79	45.637	8	2.7	MN	0.4	285
1526	139328	2018/07/15 20:40:48.6	33.781	45.679	8	2.8	MN	0.4	281
1527	139335	2018/07/16 02:19:00.0	34.626	46.266	8.7	3	MN	0.3	79
1528	139342	2018/07/16 05:33:53.7	34.625	46.289	8.2	4.2	MN	0.3	78
1529	139343	2018/07/16 05:53:18.6	34.618	46.272	7.5	3.5	MN	0.3	78
1530	139355	2018/07/16 12:24:57.2	34.635	46.275	8	2.8	MN	0.4	91
1531	139361	2018/07/16 16:12:14.1	34.519	45.908	8	2.6	MN	0.3	158
1532	139393	2018/07/17 09:35:59.0	34.597	46.268	7.1	3.3	MN	0.4	77
1533	139396	2018/07/17 13:47:38.7	33.895	45.885	10	2.8	MN	0.5	203
1534	139400	2018/07/17 16:41:46.0	34.653	46.201	8	3.1	MN	0.3	85
1535	139402	2018/07/17 18:26:57.7	34.64	46.253	10	2.7	MN	0.2	166
1536	139410	2018/07/17 23:49:10.4	35.5	46.029	7	3	MN	0.4	126
1537	139414	2018/07/18 01:30:31.2	34.621	46.284	6	3.1	MN	0.3	89
1538	139428	2018/07/18 08:51:24.7	34.673	46.235	6.8	2.8	MN	0.4	222
1539	139446	2018/07/18 20:08:19.2	34.636	46.274	10.7	2.6	MN	0.2	158
1540	139451	2018/07/19 00:58:47.8	34.656	46.244	10.8	2.5	MN	0.3	219
No.	Event ID	Origin Time	Lat.	Long.	Depth(km)	Mag.	Mag. Type	RMS(sec)	Azimuthal Gap (deg)
1541	139462	2018/07/19 07:27:21.4	33.743	45.578	10	2.7	MN	0.2	327
1542	139468	2018/07/19 09:21:19.2	34.656	46.239	9.6	3.3	MN	0.3	83
1543	139470	2018/07/19 10:44:59.2	34.626	46.279	10	2.7	MN	0.3	152
1544	139479	2018/07/19 16:05:10.8	34.625	46.248	7.2	3.1	MN	0.3	80
1545	139484	2018/07/19 20:25:33.0	35.08	45.844	8	2.9	MN	0.3	145
1546	139501	2018/07/20 07:25:34.7	34.638	46.254	8	2.6	MN	0.4	211
1547	139506	2018/07/20 13:31:55.3	34.663	46.203	8	2.6	MN	0.3	224
1548	139512	2018/07/20 18:23:43.2	34.667	46.25	7.5	2.9	MN	0.6	173
1549	139522	2018/07/20 22:29:14.7	34.643	46.284	9	2.9	MN	0.4	159
1550	139559	2018/07/22 10:07:25.2	34.63	46.255	8	5.7	MN	0.4	81
1551	139560	2018/07/22 10:13:42.8	34.637	46.267	7.4	3.2	MN	0.4	80
1552	139561	2018/07/22 10:15:15.2	34.621	46.287	7.1	2.9	MN	0.4	78
1553	139562	2018/07/22 10:18:46.7	34.617	46.255	8.7	2.9	MN	0.2	154
1554	139563	2018/07/22 10:22:26.0	34.628	46.263	10	2.7	MN	0.2	205
1555	139564	2018/07/22 10:24:06.0	34.607	46.254	10	2.6	MN	0.3	150
1556	139565	2018/07/22 10:28:20.5	34.618	46.252	8	2.9	MN	0.5	89
1557	139566	2018/07/22 10:31:27.4	34.608	46.336	6	3.1	MN	0.4	86
1558	139567	2018/07/22 10:34:05.0	34.62	46.256	10	2.6	MN	0.3	155
1559	139569	2018/07/22 10:35:50.9	34.619	46.247	10	2.6	MN	0.2	157
1560	139570	2018/07/22 10:36:37.5	34.63	46.235	10	2.8	MN	0.1	213
No.	Event ID	Origin Time	Lat.	Long.	Depth(km)	Mag.	Mag. Type	RMS(sec)	Azimuthal Gap (deg)
1561	139568	2018/07/22 10:46:09.2	34.611	46.256	8	3.9	MN	0.3	79
1562	139571	2018/07/22 10:49:54.4	34.572	46.319	5	2.9	MN	0.5	153
1563	139572	2018/07/22 10:50:35.2	34.643	46.281	10.5	2.9	MN	0.1	207
1564	139573	2018/07/22 10:56:15.3	34.654	46.263	10.5	2.7	MN	0.2	170
1565	139574	2018/07/22 10:57:42.9	34.642	46.232	10	2.5	MN	0	219
1566	139576	2018/07/22 11:11:04.1	34.614	46.305	7.3	3.4	MN	0.3	77
1567	139577	2018/07/22 11:15:26.9	34.635	46.209	1.1	2.6	MN	0.4	219
1568	139578	2018/07/22 11:21:11.8	34.598	46.281	7.2	3.3	MN	0.3	87
1569	139579	2018/07/22 11:22:08.2	34.628	46.317	9	3.3	MN	0.3	77
1570	139581	2018/07/22 11:29:23.9	34.631	46.287	8	2.9	MN	0.4	152
1571	139582	2018/07/22 11:44:40.2	34.568	46.33	8	2.5	MN	0.5	116
1572	139583	2018/07/22 11:47:46.6	34.613	46.292	10.4	2.8	MN	0.5	142
1573	139585	2018/07/22 11:49:08.3	34.637	46.313	6.2	3.1	MN	0.3	78
1574	139588	2018/07/22 11:55:40.1	34.653	46.231	10	2.5	MN	0	224
1575	139589	2018/07/22 12:06:09.3	34.598	46.176	5	2.7	MN	0.5	218
1576	139590	2018/07/22 12:10:57.9	34.594	46.243	8	2.8	MN	0.3	147
1577	139592	2018/07/22 12:13:34.8	34.612	46.212	5	2.5	MN	0.5	216
1578	139594	2018/07/22 12:17:27.9	34.631	46.201	10	2.5	MN	0.4	221
1579	139599	2018/07/22 12:41:46.7	34.618	46.242	6	3.3	MN	0.3	80
1580	139600	2018/07/22 12:47:22.5	34.649	46.301	10	2.5	MN	0.5	157
No.	Event ID	Origin Time	Lat.	Long.	Depth(km)	Mag.	Mag. Type	RMS(sec)	Azimuthal Gap (deg)
1581	139601	2018/07/22 12:50:59.9	34.609	46.264	5	2.5	MN	0.5	211
1582	139602	2018/07/22 12:57:54.1	34.602	46.24	8.5	3.3	MN	0.3	78
1583	139603	2018/07/22 13:12:35.4	34.61	46.232	10	2.8	MN	0.5	156
1584	139605	2018/07/22 13:19:48.5	34.636	46.296	10	2.6	MN	0.3	152
1585	139609	2018/07/22 13:29:44.5	34.589	46.29	8	2.8	MN	0.3	134
1586	139610	2018/07/22 13:33:44.0	34.66	46.22	10	2.7	MN	0.3	222
1587	139614	2018/07/22 14:01:49.6	34.619	46.295	8	3.1	MN	0.3	89
1588	139615	2018/07/22 14:06:55.5	34.617	46.323	7	2.7	MN	0.4	133
1589	139620	2018/07/22 14:24:09.6	34.597	46.244	7	3.4	MN	0.4	77
1590	139621	2018/07/22 14:24:59.2	34.615	46.256	10	2.7	MN	0.3	153
1591	139623	2018/07/22 14:34:32.0	34.695	46.168	10	2.5	MN	0.4	231
1592	139626	2018/07/22 14:42:26.1	34.626	46.315	6.6	3	MN	0.4	77
1593	139628	2018/07/22 14:53:44.3	34.659	46.276	11.8	2.8	MN	0.2	170
1594	139629	2018/07/22 14:56:37.8	34.621	46.222	10	2.6	MN	0.5	213
1595	139634	2018/07/22 15:10:45.2	34.644	46.276	10	2.6	MN	0.2	162
1596	139636	2018/07/22 15:17:56.1	34.684	46.219	10.9	2.5	MN	0.2	225
1597	139641	2018/07/22 15:47:58.5	34.646	46.25	8.5	2.5	MN	0.1	216
1598	139643	2018/07/22 15:59:44.7	34.61	46.253	10	2.5	MN	0.3	152
1599	139645	2018/07/22 16:19:09.9	34.655	46.299	11.6	2.5	MN	0.2	162
1600	139646	2018/07/22 16:19:48.2	34.619	46.309	7.9	3.7	MN	0.3	77
No.	Event ID	Origin Time	Lat.	Long.	Depth(km)	Mag.	Mag. Type	RMS(sec)	Azimuthal Gap (deg)
1601	139647	2018/07/22 16:24:05.8	34.683	46.227	7	2.5	MN	0.2	224
1602	139648	2018/07/22 16:24:38.0	34.62	46.251	10	2.7	MN	0.3	157
1603	139649	2018/07/22 16:32:00.9	34.614	46.357	6	2.9	MN	0.4	74
1604	139652	2018/07/22 16:48:47.7	34.585	46.296	6	4	MN	0.5	75
1605	139654	2018/07/22 17:12:43.3	34.654	46.221	11.2	2.6	MN	0.1	220
1606	139655	2018/07/22 17:21:16.3	34.628	46.224	10	2.5	MN	0.2	215
1607	139658	2018/07/22 17:32:38.6	34.646	46.28	10.8	2.6	MN	0.1	163
1608	139662	2018/07/22 17:43:49.1	34.617	46.237	10	2.8	MN	0.2	158
1609	139663	2018/07/22 17:47:37.8	34.685	46.225	7.1	2.5	MN	0.3	224
1610	139668	2018/07/22 18:16:27.6	34.641	46.273	10	2.8	MN	0.3	161
1611	139669	2018/07/22 18:18:37.9	34.663	46.232	9.4	2.5	MN	0.2	221
1612	139670	2018/07/22 18:20:00.1	34.626	46.278	10	2.8	MN	0.2	200
1613	139671	2018/07/22 18:28:05.8	34.678	46.21	10	2.5	MN	0.3	225
1614	139674	2018/07/22 18:43:34.4	34.635	46.278	8	3.1	MN	0.3	80
1615	139676	2018/07/22 19:06:02.7	34.63	46.247	7.2	2.5	MN	0.3	162
1616	139675	2018/07/22 19:08:56.0	34.606	46.237	7.3	3.7	MN	0.4	78
1617	139682	2018/07/22 19:35:16.9	34.603	46.256	8	2.9	MN	0.4	88
1618	139686	2018/07/22 19:59:01.2	34.602	46.264	8	2.6	MN	0.5	146
1619	139688	2018/07/22 20:07:47.9	34.652	46.261	8	2.9	MN	0.4	170
1620	139689	2018/07/22 20:08:33.3	34.637	46.282	7.1	3.3	MN	0.3	80
No.	Event ID	Origin Time	Lat.	Long.	Depth(km)	Mag.	Mag. Type	RMS(sec)	Azimuthal Gap (deg)
1621	139690	2018/07/22 20:09:53.7	34.647	46.243	7.3	2.7	MN	0.3	169
1622	139697	2018/07/22 20:49:54.5	34.595	46.259	8	3.1	MN	0.4	77
1623	139710	2018/07/22 21:40:43.5	34.631	46.294	8	2.8	MN	0.5	90
1624	139715	2018/07/22 22:16:24.1	34.634	46.289	8	2.6	MN	0.5	153
1625	139725	2018/07/22 22:54:42.1	34.642	46.278	10	2.6	MN	0.4	160
1626	139732	2018/07/22 23:28:49.0	34.61	46.259	8.4	2.7	MN	0.3	149
1627	139734	2018/07/22 23:48:05.5	34.658	46.254	7.3	2.5	MN	0.4	171
1628	139746	2018/07/23 00:39:10.9	34.613	46.262	10	2.7	MN	0.2	151
1629	139748	2018/07/23 00:59:47.6	34.606	46.303	6	4.4	MN	0.4	84
1630	139749	2018/07/23 01:13:44.8	34.648	46.26	7.9	3.3	MN	0.3	81
1631	139753	2018/07/23 01:34:47.4	34.026	45.801	10	2.8	MN	0.4	200
1632	139755	2018/07/23 01:55:21.9	34.619	46.268	8.5	2.9	MN	0.2	89
1633	139756	2018/07/23 02:00:46.3	34.602	46.245	8	2.9	MN	0.5	89
1634	139768	2018/07/23 04:00:28.2	34.621	46.254	7.5	2.7	MN	0.3	204
1635	139771	2018/07/23 04:12:50.7	34.638	46.249	9	2.8	MN	0.3	214
1636	139783	2018/07/23 05:29:09.8	34.647	46.231	9	2.7	MN	0.3	219
1637	139787	2018/07/23 05:47:16.5	34.644	46.301	10	2.8	MN	0.3	155
1638	139800	2018/07/23 07:09:50.8	34.638	46.229	11.2	2.5	MN	0.1	218
1639	139802	2018/07/23 07:30:55.0	34.675	46.221	13	2.6	MN	0.3	223
1640	139806	2018/07/23 08:01:48.1	34.608	46.261	17.5	2.9	MN	0.3	148
No.	Event ID	Origin Time	Lat.	Long.	Depth(km)	Mag.	Mag. Type	RMS(sec)	Azimuthal Gap (deg)
1641	139813	2018/07/23 08:37:30.7	34.627	46.254	11	2.8	MN	0.3	207
1642	139815	2018/07/23 08:47:03.2	34.62	46.307	6	3.2	MN	0.4	78
1643	139824	2018/07/23 10:47:34.8	34.618	46.281	9.8	3	MN	0.3	89
1644	139827	2018/07/23 11:22:51.0	34.622	46.285	7.3	3.1	MN	0.2	78
1645	139828	2018/07/23 11:40:35.4	34.844	46.312	10	2.6	MN	0.5	288
1646	139831	2018/07/23 12:09:53.1	34.639	46.29	8	2.9	MN	0.5	156
1647	139832	2018/07/23 13:35:37.3	34.614	46.242	10	2.6	MN	0.3	205
1648	139838	2018/07/23 15:00:19.3	34.646	46.186	10	2.5	MN	0.4	224
1649	139840	2018/07/23 15:13:32.3	34.648	46.268	10	2.5	MN	0.2	213
1650	139842	2018/07/23 15:30:21.9	34.624	46.266	10	2.5	MN	0.2	155
1651	139844	2018/07/23 16:00:21.6	34.602	46.233	7.1	3.4	MN	0.3	79
1652	139845	2018/07/23 16:14:38.2	34.638	46.297	10	2.7	MN	0.3	198
1653	139851	2018/07/23 17:51:57.9	34.387	45.586	10.7	3.3	MN	0.4	211
1654	139852	2018/07/23 17:56:45.5	34.653	46.282	8.2	2.5	MN	0.2	211
1655	139856	2018/07/23 19:26:29.9	34.689	46.241	9.5	2.5	MN	0.4	178
1656	139874	2018/07/23 22:25:27.9	34.619	46.278	8	2.5	MN	0.3	149
1657	139882	2018/07/24 00:51:10.6	34.632	46.269	10	2.9	MN	0.2	157
1658	139889	2018/07/24 02:10:51.2	34.638	46.244	10	2.5	MN	0.2	214
1659	139890	2018/07/24 02:23:10.1	34.631	46.296	8	2.9	MN	0.4	97
1660	139891	2018/07/24 02:34:35.7	34.637	46.319	7	3.5	MN	0.3	78
No.	Event ID	Origin Time	Lat.	Long.	Depth(km)	Mag.	Mag. Type	RMS(sec)	Azimuthal Gap (deg)
1661	139892	2018/07/24 02:51:14.9	34.611	46.33	8.3	2.8	MN	0.4	87
1662	139894	2018/07/24 03:03:48.8	34.649	46.249	15.3	2.6	MN	0.1	217
1663	139897	2018/07/24 03:38:15.9	34.604	46.254	10	2.5	MN	0.2	199
1664	139902	2018/07/24 04:36:57.4	34.68	46.295	17.6	2.8	MN	0.1	216
1665	139903	2018/07/24 04:39:01.2	34.519	45.704	15.9	2.8	MN	0.3	167
1666	139913	2018/07/24 07:12:21.0	34.618	46.273	10	2.8	MN	0.3	150
1667	139914	2018/07/24 07:15:06.1	34.631	46.284	12	2.6	MN	0.2	153
1668	139916	2018/07/24 07:37:40.3	34.617	46.27	7.9	3.3	MN	0.5	78
1669	139917	2018/07/24 07:53:01.5	34.604	46.292	8	2.9	MN	0.4	94
1670	139921	2018/07/24 08:46:11.3	34.643	46.312	7.7	4.5	MN	0.5	79
1671	139928	2018/07/24 09:35:57.7	34.688	46.305	13.4	2.5	MN	0.3	217
1672	139946	2018/07/24 14:21:58.9	34.643	46.184	10	2.5	MN	0.4	293
1673	139948	2018/07/24 15:05:09.8	34.615	46.27	10	2.5	MN	0.3	198
1674	139954	2018/07/24 16:00:46.2	34.628	46.319	8	2.8	MN	0.5	139
1675	139955	2018/07/24 16:27:51.2	34.632	46.323	9	3.6	MN	0.2	78
1676	139958	2018/07/24 17:10:40.0	34.628	46.276	8	2.7	MN	0.6	201
1677	139957	2018/07/24 17:18:30.5	34.627	46.329	8	3.5	MN	0.4	77
1678	122030	2018/07/24 17:21:07.7	34.622	46.373	10	2.7	MN	0.6	108
1679	139961	2018/07/24 18:17:03.9	34.604	46.26	8	3	MN	0.4	78
1680	139969	2018/07/24 19:58:29.5	34.794	45.816	5.5	4.4	MN	0.4	136
No.	Event ID	Origin Time	Lat.	Long.	Depth(km)	Mag.	Mag. Type	RMS(sec)	Azimuthal Gap (deg)
1681	139985	2018/07/25 01:12:01.4	34.612	46.231	7.4	2.5	MN	0.2	157
1682	139991	2018/07/25 01:47:47.7	34.634	46.315	9.2	4.2	MN	0.3	78
1683	139993	2018/07/25 02:12:41.4	34.663	46.239	10	2.7	MN	0.2	220
1684	139994	2018/07/25 02:45:15.2	34.688	46.242	16.1	2.5	MN	0.2	223
1685	139999	2018/07/25 03:24:16.9	34.627	46.263	11	2.7	MN	0.2	165
1686	140004	2018/07/25 04:16:57.1	34.675	46.273	9	2.8	MN	0.3	173
1687	140003	2018/07/25 04:17:43.3	34.641	46.349	8	2.7	MN	0.3	206
1688	140010	2018/07/25 06:56:09.3	34.603	46.288	8	2.6	MN	0.3	187
1689	140028	2018/07/25 14:22:17.7	34.663	46.297	11.7	2.8	MN	0.2	214
1690	140030	2018/07/25 15:32:47.9	34.668	46.251	10.1	2.5	MN	0.2	220
1691	140033	2018/07/25 17:41:01.6	33.733	45.591	8	2.8	MN	0.4	292
1692	140051	2018/07/26 00:42:39.4	34.613	46.256	10	2.6	MN	0.3	152
1693	140055	2018/07/26 02:00:55.0	34.637	46.303	9	2.8	MN	0.3	149
1694	140058	2018/07/26 02:18:49.3	34.629	46.293	8.9	3	MN	0.3	79
1695	140065	2018/07/26 05:35:23.2	34.637	46.252	11.3	2.8	MN	0.2	211
1696	140072	2018/07/26 06:49:22.2	34.606	46.263	10	2.7	MN	0.3	147
1697	140073	2018/07/26 07:30:11.6	34.628	46.319	8	3.2	MN	0.4	77
1698	140074	2018/07/26 07:42:07.6	34.671	46.283	10	2.5	MN	0.2	172
1699	140076	2018/07/26 08:23:11.5	34.612	46.273	8.1	2.6	MN	0.3	196
1700	140077	2018/07/26 08:24:34.5	34.632	46.276	11.5	2.9	MN	0.3	155
No.	Event ID	Origin Time	Lat.	Long.	Depth(km)	Mag.	Mag. Type	RMS(sec)	Azimuthal Gap (deg)
1701	140097	2018/07/26 15:51:19.2	34.317	45.622	11.9	4	MN	0.3	207
1702	140101	2018/07/26 16:40:29.4	34.605	46.253	8	2.8	MN	0.3	149
1703	140105	2018/07/26 19:16:58.3	34.598	46.253	8	2.6	MN	0.3	146
1704	140106	2018/07/26 19:33:13.1	34.584	46.268	7.2	2.9	MN	0.5	76
1705	140116	2018/07/26 23:44:10.6	34.633	46.255	7.5	2.8	MN	0.4	161
1706	140119	2018/07/27 00:37:53.7	35.24	45.807	8	2.8	MN	0.3	274
1707	140123	2018/07/27 01:21:36.2	34.628	46.29	8.2	2.7	MN	0.4	150
1708	140131	2018/07/27 03:36:24.5	34.597	46.256	7.5	2.8	MN	0.3	145
1709	140130	2018/07/27 03:57:43.6	34.746	45.856	10	2.6	MN	0.3	233
1710	140128	2018/07/27 04:00:32.0	34.584	46.307	6	3.6	MN	0.4	74
1711	140134	2018/07/27 05:23:42.7	34.676	46.279	7.2	2.6	MN	0.2	218
1712	140135	2018/07/27 05:29:10.3	34.816	45.744	10	2.8	MN	0.4	241
1713	140138	2018/07/27 13:33:59.6	34.657	46.324	7.5	2.8	MN	0.3	154
1714	140150	2018/07/28 01:53:48.2	34.631	46.253	8	2.9	MN	0.3	161
1715	140151	2018/07/28 01:58:37.6	34.559	46.299	7.3	3.2	MN	0.4	73
1716	140158	2018/07/28 04:10:49.4	34.609	46.251	10.2	2.7	MN	0.1	201
1717	140165	2018/07/28 12:02:07.4	34.622	46.3	8	2.9	MN	0.4	88
1718	140173	2018/07/28 18:26:56.3	34.619	46.194	8	2.6	MN	0.4	218
1719	140175	2018/07/28 20:04:15.7	34.664	46.227	8	2.7	MN	0.5	95
1720	140178	2018/07/28 20:50:52.9	34.639	46.223	5	2.7	MN	0.4	219
No.	Event ID	Origin Time	Lat.	Long.	Depth(km)	Mag.	Mag. Type	RMS(sec)	Azimuthal Gap (deg)
1721	140187	2018/07/29 00:07:29.6	34.659	46.253	10	2.9	MN	0.3	171
1722	140191	2018/07/29 02:33:36.4	34.878	47.245	7	3.2	MN	0.3	47
1723	140197	2018/07/29 05:25:06.5	34.666	46.232	10	2.6	MN	0.4	221
1724	140203	2018/07/29 09:26:25.1	34.682	46.191	8	2.7	MN	0.4	227
1725	140205	2018/07/29 10:33:29.5	34.624	46.209	6	3.3	MN	0.5	82
1726	140211	2018/07/29 12:24:19.5	34.616	46.24	10	2.7	MN	0.3	156
1727	140227	2018/07/30 00:44:22.4	34.842	45.614	13.3	3	MN	0.3	171
1728	140234	2018/07/30 03:02:57.7	34.597	46.301	5	3.3	MN	0.3	76
1729	140239	2018/07/30 04:33:45.4	34.644	46.282	11.3	2.6	MN	0.2	160
1730	140247	2018/07/30 08:42:25.6	33.721	45.607	8	3.7	MN	0.4	222
1731	140255	2018/07/30 11:02:45.9	34.685	46.221	8.8	2.5	MN	0	240
1732	140256	2018/07/30 12:09:10.3	34.627	46.222	10	2.6	MN	0.3	215
1733	140267	2018/07/31 00:32:02.9	34.606	46.21	8	3.3	MN	0.3	80
1734	140269	2018/07/31 01:17:22.2	34.601	46.274	6	3.5	MN	0.4	77
1735	140285	2018/07/31 07:11:42.0	34.656	46.301	15.1	2.6	MN	0.2	162
1736	140301	2018/07/31 15:10:00.7	33.79	45.562	12	2.5	MN	0.2	290
1737	140319	2018/08/01 03:00:26.0	34.668	46.309	15.3	2.6	MN	0.2	213
1738	140325	2018/08/01 06:23:01.4	34.613	46.258	11	2.6	MN	0.2	212
1739	140327	2018/08/01 07:48:18.6	34.595	46.272	7.5	3.3	MN	0.4	77
1740	140331	2018/08/01 12:10:38.7	34.661	46.15	12.1	2.8	MN	0.3	229
No.	Event ID	Origin Time	Lat.	Long.	Depth(km)	Mag.	Mag. Type	RMS(sec)	Azimuthal Gap (deg)
1741	140359	2018/08/02 11:35:06.8	34.653	46.251	10	2.5	MN	0.3	219
1742	140360	2018/08/02 11:45:10.2	34.489	45.668	7.6	3.4	MN	0.3	132
1743	140362	2018/08/02 17:45:52.4	34.672	46.224	8.6	2.7	MN	0.1	233
1744	140367	2018/08/02 18:40:18.3	34.649	46.241	10.4	2.6	MN	0	245
1745	140385	2018/08/03 07:23:52.6	34.657	46.241	8	3.1	MN	0.4	83
1746	140428	2018/08/04 11:06:27.6	34.642	46.315	11	2.6	MN	0.3	193
1747	140432	2018/08/04 17:02:04.1	34.62	46.354	8.1	4.1	MN	0.5	75
1748	140433	2018/08/04 17:09:25.8	34.652	46.314	11.9	2.9	MN	0.2	156
1749	140436	2018/08/04 18:09:19.2	34.636	46.295	8	3	MN	0.4	89
1750	140438	2018/08/04 18:29:17.5	34.638	46.323	10.8	2.7	MN	0.3	143
1751	140448	2018/08/05 03:36:59.1	34.647	46.295	11	2.5	MN	0.2	167
1752	140456	2018/08/05 09:54:32.8	34.721	45.597	10	2.9	MN	0.3	263
1753	140460	2018/08/05 13:58:12.0	34.65	46.261	10.4	2.8	MN	0.3	168
1754	140458	2018/08/05 13:59:25.2	34.641	45.7	6	3.4	MN	0.4	139
1755	140465	2018/08/05 21:44:26.3	34.767	46.34	10.7	2.9	MN	0.1	186
1756	140466	2018/08/05 22:34:21.9	34.409	45.811	6	3.1	MN	0.3	133
1757	140486	2018/08/06 16:36:22.4	34.682	46.254	11.9	2.8	MN	0.2	234
1758	140497	2018/08/06 21:22:52.8	35.058	45.556	8.5	2.5	MN	0.3	187
1759	140524	2018/08/07 16:17:05.0	35.061	46.637	10	2.9	MN	0.4	133
1760	140526	2018/08/07 17:29:12.2	34.58	46.271	10	2.6	MN	0.4	186
No.	Event ID	Origin Time	Lat.	Long.	Depth(km)	Mag.	Mag. Type	RMS(sec)	Azimuthal Gap (deg)
1761	140534	2018/08/08 03:34:39.7	35.095	46.657	5.7	3.1	MN	0.5	81
1762	140540	2018/08/08 08:31:35.6	34.826	45.876	9.7	2.6	MN	0.2	231
1763	140543	2018/08/08 13:11:42.2	34.606	46.267	7.1	3.5	MN	0.4	78
1764	140544	2018/08/08 13:15:31.2	34.657	46.258	10.7	2.5	MN	0	220
1765	140554	2018/08/08 18:49:51.8	35.332	44.53	10	2.9	MN	0.8	256
1766	140581	2018/08/09 19:25:30.3	34.588	46.269	7.1	2.6	MN	0.3	189
1767	140592	2018/08/10 02:06:40.0	34.869	45.092	8.5	2.8	MN	0.4	232
1768	140595	2018/08/10 02:52:59.2	34.82	45.886	8	2.9	MN	0.4	128
1769	140608	2018/08/10 18:10:18.1	34.608	46.231	8.9	2.7	MN	0.3	156
1770	140612	2018/08/10 22:16:30.3	34.633	46.288	11.9	2.5	MN	0.2	153
1771	140637	2018/08/11 19:10:48.4	33.634	45.674	9	3.7	MN	0.3	239
1772	140667	2018/08/12 07:57:03.8	33.69	45.692	8	2.8	MN	0.3	285
1773	140674	2018/08/12 16:56:25.3	34.581	46.017	10	2.5	MN	0.1	238
1774	140690	2018/08/13 09:34:55.2	34.631	46.287	8	2.6	MN	0.2	152
1775	140691	2018/08/13 10:07:44.7	34.626	46.286	8	2.9	MN	0.3	90
1776	140692	2018/08/13 10:18:42.6	34.603	45.797	8	3.8	MN	0.3	110
1777	140742	2018/08/15 02:32:24.4	34.61	46.319	6	3.7	MN	0.4	76
1778	140778	2018/08/15 23:22:03.6	34.609	46.261	6.4	3.4	MN	0.4	78
1779	140789	2018/08/16 06:03:07.7	34.648	46.325	6	3.2	MN	0.3	79
1780	140796	2018/08/16 10:05:52.5	34.619	46.23	10	2.7	MN	0.3	210
No.	Event ID	Origin Time	Lat.	Long.	Depth(km)	Mag.	Mag. Type	RMS(sec)	Azimuthal Gap (deg)
1781	140804	2018/08/16 15:58:33.8	34.673	45.805	14.1	2.7	MN	0.3	208
1782	140842	2018/08/17 21:46:24.2	33.672	45.673	8.6	3.1	MN	0.5	247
1783	140856	2018/08/18 14:16:53.5	34.786	45.947	10	2.8	MN	0.2	214
1784	140863	2018/08/18 22:33:50.9	34.363	46.123	6	3.3	MN	0.3	73
1785	140866	2018/08/18 23:26:21.7	34.637	46.399	7.9	2.6	MN	0.3	92
1786	140872	2018/08/19 04:02:19.1	34.21	45.678	9	2.6	MN	0.5	203
1787	140888	2018/08/19 14:57:51.9	34.619	46.267	7	3.2	MN	0.4	79
1788	140938	2018/08/21 02:27:19.3	34.642	46.284	6	3.7	MN	0.6	80
1789	140993	2018/08/22 12:35:37.6	35.23	46.094	12	2.5	MN	0.6	305
1790	140999	2018/08/22 16:10:19.3	35.259	46.366	5	3.3	MN	0.5	100
1791	141013	2018/08/22 23:07:39.9	34.767	45.782	10	2.7	MN	0.3	139
1792	141030	2018/08/23 10:41:26.1	34.645	46.197	10	2.5	MN	0.3	222
1793	141035	2018/08/23 13:14:17.8	34.671	46.317	7.9	2.8	MN	0.4	212
1794	141059	2018/08/24 07:32:14.3	34.93	45.144	8	2.8	MN	0.1	304
1795	141069	2018/08/24 11:31:44.8	35.145	45.434	10	2.6	MN	0.5	310
1796	141115	2018/08/25 22:13:25.0	34.622	46.233	8.3	5.9	MN	0.3	56
1797	141116	2018/08/25 22:34:29.1	34.627	46.228	6	3	MN	0.4	81
1798	141117	2018/08/25 22:40:36.2	34.62	46.187	5.9	3.7	MN	0.3	83
1799	141118	2018/08/25 22:47:46.6	34.62	46.184	6	3.9	MN	0.4	83
1800	141120	2018/08/25 23:02:40.9	34.593	46.213	8	2.9	MN	0.4	78
No.	Event ID	Origin Time	Lat.	Long.	Depth(km)	Mag.	Mag. Type	RMS(sec)	Azimuthal Gap (deg)
1801	141121	2018/08/25 23:03:54.7	34.616	46.173	8	3	MN	0.4	83
1802	141123	2018/08/25 23:07:22.7	34.627	46.199	6	3.1	MN	0.4	82
1803	141124	2018/08/25 23:09:11.0	34.638	46.128	8	3	MN	0.5	87
1804	141122	2018/08/25 23:11:47.0	34.648	46.337	11.8	2.8	MN	0.1	148
1805	141126	2018/08/25 23:14:47.6	33.908	46.524	9	2.8	MN	0.1	183
1806	141127	2018/08/25 23:25:06.2	34.615	46.247	8.1	4	MN	0.3	79
1807	141125	2018/08/25 23:26:41.9	34.622	46.237	10	2.7	MN	0.2	165
1808	141128	2018/08/25 23:27:48.7	34.635	46.178	7.8	3.2	MN	0.2	86
1809	141129	2018/08/25 23:34:48.6	34.736	46.169	10	2.6	MN	0.1	283
1810	141131	2018/08/25 23:35:33.0	34.643	46.17	9	2.9	MN	0.1	230
1811	141130	2018/08/25 23:38:08.1	34.651	46.177	10.6	2.6	MN	0	231
1812	141132	2018/08/25 23:44:52.7	34.605	46.2	7.1	2.5	MN	0.1	212
1813	141134	2018/08/25 23:48:17.3	34.613	46.253	7.5	3.7	MN	0.2	79
1814	141133	2018/08/25 23:58:05.1	34.638	46.215	10	2.9	MN	0.3	169
1815	141135	2018/08/26 00:04:46.8	34.609	46.165	8	3.1	MN	0.3	82
1816	141136	2018/08/26 00:11:03.5	34.591	46.206	8.3	3.5	MN	0.3	78
1817	141137	2018/08/26 00:21:47.6	34.627	46.142	7.6	3.3	MN	0.3	86
1818	141138	2018/08/26 00:27:48.3	34.578	46.238	5	3.2	MN	0.5	76
1819	141141	2018/08/26 00:32:25.3	34.636	46.25	8.6	2.6	MN	0.5	282
1820	141140	2018/08/26 00:44:26.2	34.621	46.157	9	2.9	MN	0.2	171
No.	Event ID	Origin Time	Lat.	Long.	Depth(km)	Mag.	Mag. Type	RMS(sec)	Azimuthal Gap (deg)
1821	141143	2018/08/26 00:50:34.1	34.61	46.198	10	2.5	MN	0.3	214
1822	141142	2018/08/26 00:53:49.4	34.615	46.23	6	3.9	MN	0.6	80
1823	141145	2018/08/26 00:56:36.1	34.607	46.2	10	2.9	MN	0.2	160
1824	141144	2018/08/26 00:59:12.4	34.608	46.196	7.4	2.9	MN	0.3	81
1825	141146	2018/08/26 01:06:48.2	34.627	46.184	7.3	3	MN	0.2	84
1826	141149	2018/08/26 01:11:16.3	34.61	46.217	10	2.7	MN	0.2	210
1827	141148	2018/08/26 01:15:52.2	34.616	46.178	10	2.7	MN	0.3	220
1828	141150	2018/08/26 01:29:55.4	34.611	46.248	8	3.1	MN	0.4	79
1829	141156	2018/08/26 01:38:20.2	34.628	46.25	10	2.6	MN	0.3	209
1830	141151	2018/08/26 01:41:45.5	34.618	46.262	9	2.9	MN	0.3	202
1831	141155	2018/08/26 01:44:03.3	34.609	46.189	6	3.2	MN	0.4	82
1832	141153	2018/08/26 01:45:19.8	34.621	46.176	11.4	2.9	MN	0.1	222
1833	141154	2018/08/26 01:46:11.7	34.618	46.209	10	2.8	MN	0.1	241
1834	141159	2018/08/26 01:52:37.1	34.635	46.218	11.2	2.9	MN	0.2	169
1835	141157	2018/08/26 02:09:55.2	34.623	46.186	10	2.6	MN	0.1	219
1836	141162	2018/08/26 02:21:01.1	34.604	46.245	10	2.5	MN	0.2	201
1837	141160	2018/08/26 02:26:34.2	34.6	46.25	7.3	2.9	MN	0.5	89
1838	141161	2018/08/26 02:56:31.3	34.626	46.141	9.9	2.8	MN	0.4	171
1839	141163	2018/08/26 03:03:23.3	34.622	46.273	6.3	3.2	MN	0.3	89
1840	141166	2018/08/26 03:09:53.1	34.626	46.177	10	2.7	MN	0.2	169
No.	Event ID	Origin Time	Lat.	Long.	Depth(km)	Mag.	Mag. Type	RMS(sec)	Azimuthal Gap (deg)
1841	141165	2018/08/26 03:10:35.8	34.622	46.227	10	2.8	MN	0.2	161
1842	141167	2018/08/26 03:20:56.8	34.629	46.247	10	2.8	MN	0.2	210
1843	141168	2018/08/26 03:29:49.7	34.637	46.253	10	2.8	MN	0.4	163
1844	141169	2018/08/26 03:33:08.6	34.614	46.251	10	2.9	MN	0.3	153
1845	141170	2018/08/26 03:34:25.7	34.623	46.275	6	3.3	MN	0.4	78
1846	141171	2018/08/26 03:42:11.6	34.62	46.169	8	3.3	MN	0.4	83
1847	141174	2018/08/26 04:01:43.7	34.631	46.206	10	2.7	MN	0.3	220
1848	141176	2018/08/26 04:08:31.3	34.684	46.206	11.7	2.6	MN	0.1	226
1849	141177	2018/08/26 04:17:07.2	34.637	46.267	8	3.6	MN	0.3	80
1850	141178	2018/08/26 04:21:50.2	34.648	46.156	10	2.6	MN	0.2	227
1851	141181	2018/08/26 04:39:05.3	34.619	46.174	10	2.8	MN	0.3	168
1852	141183	2018/08/26 04:42:39.4	34.614	46.175	10	2.6	MN	0.1	220
1853	141184	2018/08/26 04:48:58.9	34.624	46.289	8	3.4	MN	0.4	78
1854	141186	2018/08/26 04:53:12.2	34.651	46.245	10.9	2.8	MN	0.3	170
1855	141185	2018/08/26 04:58:32.5	34.668	46.213	10	2.7	MN	0.3	223
1856	141188	2018/08/26 05:09:13.4	34.622	46.197	10	2.7	MN	0.2	167
1857	141187	2018/08/26 05:10:40.0	34.658	46.183	11	2.5	MN	0.2	225
1858	141189	2018/08/26 05:18:28.5	34.622	46.231	9	4	MN	0.6	80
1859	141190	2018/08/26 05:33:08.2	34.635	46.173	10	2.6	MN	0.2	223
1860	141196	2018/08/26 06:07:13.6	34.629	46.232	9	2.5	MN	0.3	88
No.	Event ID	Origin Time	Lat.	Long.	Depth(km)	Mag.	Mag. Type	RMS(sec)	Azimuthal Gap (deg)
1861	141197	2018/08/26 06:17:15.7	34.603	46.298	5	3.6	MN	0.6	76
1862	141207	2018/08/26 06:20:23.6	34.647	46.271	10	2.7	MN	0.2	212
1863	141198	2018/08/26 06:27:46.7	34.625	46.18	9	2.7	MN	0.3	221
1864	141200	2018/08/26 06:40:06.3	34.642	46.295	9	2.8	MN	0.3	201
1865	141201	2018/08/26 06:54:04.1	34.627	46.209	8	3.3	MN	0.3	133
1866	141208	2018/08/26 07:18:53.6	34.636	46.22	10	2.9	MN	0.2	219
1867	141210	2018/08/26 07:31:59.0	34.624	46.288	6	2.8	MN	0.4	195
1868	141214	2018/08/26 07:52:20.5	34.647	46.28	8.3	2.9	MN	0.3	168
1869	141215	2018/08/26 07:59:17.8	34.605	46.215	8.7	3.5	MN	0.3	80
1870	141216	2018/08/26 08:03:22.2	34.69	46.098	8.4	2.8	MN	0.4	195
1871	141219	2018/08/26 08:25:03.2	34.62	46.259	8	4	MN	0.4	79
1872	141223	2018/08/26 08:41:51.6	34.631	46.203	7.7	3.6	MN	0.3	83
1873	141226	2018/08/26 08:55:57.8	34.645	46.188	12.5	2.5	MN	0.3	223
1874	141225	2018/08/26 08:59:24.9	34.638	46.227	6.8	3.1	MN	0.3	82
1875	141227	2018/08/26 09:01:37.1	34.646	46.226	10	2.5	MN	0.3	171
1876	141228	2018/08/26 09:02:35.5	34.634	46.281	16.7	2.6	MN	0.1	155
1877	141229	2018/08/26 09:17:59.0	34.697	46.218	11	2.7	MN	0.3	180
1878	141230	2018/08/26 09:23:33.3	34.608	46.202	7	4.1	MN	0.4	80
1879	141231	2018/08/26 09:35:19.3	34.621	46.234	15.1	2.5	MN	0.1	160
1880	141233	2018/08/26 09:54:48.2	34.688	46.304	10.6	2.6	MN	0.3	217
No.	Event ID	Origin Time	Lat.	Long.	Depth(km)	Mag.	Mag. Type	RMS(sec)	Azimuthal Gap (deg)
1881	141237	2018/08/26 10:13:17.7	34.638	46.224	8.2	2.7	MN	0.1	218
1882	141238	2018/08/26 10:23:44.3	34.714	46.096	18	2.9	MN	0.3	259
1883	141240	2018/08/26 10:29:12.9	34.618	46.145	10	2.5	MN	0.1	225
1884	141242	2018/08/26 10:37:21.7	34.621	46.242	8	2.9	MN	0.4	159
1885	141244	2018/08/26 11:03:08.8	34.643	46.232	10	2.7	MN	0	219
1886	141245	2018/08/26 11:07:09.7	34.617	46.22	10	2.5	MN	0.3	212
1887	141246	2018/08/26 11:10:39.3	34.621	46.141	10	2.5	MN	0	228
1888	141249	2018/08/26 11:28:00.6	34.646	46.195	10	2.9	MN	0.1	227
1889	141252	2018/08/26 11:36:35.3	34.674	46.039	10	2.8	MN	0.9	304
1890	141251	2018/08/26 11:46:52.4	34.642	46.183	10	2.6	MN	0.1	223
1891	141250	2018/08/26 11:54:43.6	34.622	46.179	7.3	2.8	MN	0.2	221
1892	141253	2018/08/26 12:21:14.2	34.604	46.227	8.4	2.7	MN	0.4	206
1893	141254	2018/08/26 12:26:33.1	34.67	46.212	10	2.9	MN	0.1	224
1894	141255	2018/08/26 12:33:27.9	34.637	46.179	6	3.7	MN	0.3	85
1895	141259	2018/08/26 13:01:26.7	34.614	46.113	6	2.5	MN	0.5	227
1896	141260	2018/08/26 13:07:09.2	34.661	46.204	8	3	MN	0.3	223
1897	141263	2018/08/26 13:25:48.0	34.775	46.608	10	2.5	MN	0	252
1898	141264	2018/08/26 13:29:09.9	34.619	46.195	8	2.9	MN	0.3	218
1899	141266	2018/08/26 13:54:16.1	34.668	46.201	9	2.8	MN	0.2	224
1900	141269	2018/08/26 14:08:45.8	34.61	46.254	6	3.2	MN	0.4	128
No.	Event ID	Origin Time	Lat.	Long.	Depth(km)	Mag.	Mag. Type	RMS(sec)	Azimuthal Gap (deg)
1901	141341	2018/08/26 14:30:07.9	34.68	46.148	8	2.7	MN	0.3	231
1902	141272	2018/08/26 14:55:31.4	34.619	46.178	10	2.9	MN	0.4	221
1903	141273	2018/08/26 15:01:04.9	34.635	46.215	8	3.2	MN	0.4	143
1904	141274	2018/08/26 15:13:59.2	34.617	46.262	8	2.6	MN	0.3	201
[truncated: 245 more rows]
