# Supplementary material
Source: MDPI journal article supplement (https://www.mdpi.com/2220-9964/8/10/462)
Supplement: s1 [file s1 › aftershocks_predictions_IJGI.xlsx]

## Sheet: Sheet1
FID	POINTID	Damage_State	naive_no_fault	naïve_1	naïve_2	KNN_no_Fault	KNN_1	KNN_2	SVM_no_Fault	SVM_1	SVM_2	RDF_no_Fault	RDF_1	RDF_2	raster_RMS	colomb_rst	slip_100	fault_1tes	fault_2tes	fault_3tes	fault_4tes	rster_Magnitude	raster_depth	azimuth	lat	long	slope
0	38658	1	0	0	0	1	1	0	0	0	0	0	0	0	0.7	0.14	0	15148.9	48757.1	77004.2	95908.5	2.8	10	268	35.1766	45.8251	14.6811
1	38935	1	0	0	0	0	0	0	0	0	0	0	0	0	0.4	-0.26	0.0678	25052.9	46352.2	75029.4	92849.3	2.6	10	187	35.1667	45.6801	15.4891
2	39519	1	0	0	0	1	1	0	0	0	0	0	0	0	0.3	0.13	0	15454.8	44519.3	72986.4	91678.8	2.7	8	263	35.1444	45.7853	10.6718
3	39526	1	0	0	0	1	1	0	0	0	0	0	1	0	0.3	0.15	0	9451.46	46656.7	74320.7	93547.2	2.8	8	264	35.1438	45.8775	12.6274
4	39527	1	0	0	0	1	0	0	0	0	0	0	1	0	0.4	0.15	0	8915.72	47076.6	74586.7	93872.5	2.5	10	140	35.1437	45.8907	3.59206
5	39806	1	0	0	0	1	1	0	0	0	0	0	0	0	0.3	0.13	0	15921.4	43147.8	71677.4	90288.6	3.1	8.2	153	35.1337	45.772	10.0579
6	40103	1	0	0	0	1	1	0	0	0	0	0	1	0	0.2	0.21	0	6774.22	44847	72252.7	91568.8	2.7	10	326	35.1221	45.8904	3.69482
7	40362	1	0	0	0	0	0	0	0	0	0	0	0	0	0.3	0.03	0	38575.3	44056	71234.1	87046	3	8	185	35.1134	45.5084	27.5125
8	40367	1	0	0	0	1	1	1	0	0	0	0	0	0	0.3	0.11	0	32625.9	41992	69984.9	86645.3	2.8	11	186	35.1131	45.5743	38.6812
9	40383	1	0	0	0	1	0	1	0	0	0	0	0	0	0.3	0.18	0	13884.2	40973.8	69406.4	88139.2	3.2	6	180	35.112	45.785	3.93761
10	40385	1	0	0	0	1	1	1	0	0	0	0	0	0	0.5	0.18	0	11646.9	41474.4	69706.6	88617.2	2.6	10	264	35.1118	45.8113	26.3682
11	40667	1	0	0	0	1	1	1	0	0	0	0	0	0	0.4	0.19	0	18220	39186.4	67853.7	86184.2	2.8	16.1	269	35.1015	45.7322	18.8927
12	40673	1	0	0	0	1	0	1	0	0	0	0	0	0	0.5	0.18	0	11227.2	40309.4	68519	87444.8	2.7	8	205	35.101	45.8112	36.2797
13	40675	1	0	0	0	1	1	1	0	0	0	0	1	0	0.5	0.2	0	8969.39	40959.1	68906.7	87992	4.8	8	91	35.1008	45.8375	10.6422
14	40680	1	0	0	0	1	1	0	0	0	0	0	1	0	0.3	0.21	0	4104.88	43128.3	70226.3	89627	2.8	9.3	151	35.1003	45.9034	17.6851
15	40685	1	0	0	0	1	1	0	0	0	0	0	0	0	0.5	0.33	0	5024.94	45983.1	72023.1	91626.4	3.1	7.9	167	35.0998	45.9692	22.0731
16	40972	1	0	0	0	1	1	0	0	0	0	0	0	0	0.1	0.33	0	3330.17	44332.9	70492.3	90075.7	2.5	10	315	35.0891	45.9559	0
17	40993	1	0	0	0	0	1	0	0	0	0	0	0	0	0.4	-1.74	0.5631	25504.9	61299.3	82270.6	101791	2.7	10	170	35.0866	46.2323	35.044
18	41250	1	0	0	0	1	1	1	0	0	0	0	0	0	0.1	0.34	0	9552.49	38313.1	66335.3	85375.6	2.9	10	329	35.0792	45.8241	25.4963
19	41251	1	0	0	0	1	1	1	0	0	0	0	0	0	0.6	0.34	0	8360.02	38674.7	66546.6	85664.7	5.4	8	81	35.0792	45.8373	14.8744
20	41252	1	0	0	0	1	1	1	0	0	0	0	0	0	0.5	0.34	0	7170.08	39069.8	66778.8	85969.5	3.4	6	176	35.0791	45.8505	9.73715
21	41254	1	0	0	0	1	1	1	0	0	0	0	0	0	0.4	0.33	0	4805.21	39956.6	67305.1	86625.9	3.1	8	141	35.0789	45.8768	18.8823
22	41256	1	0	0	0	1	1	1	0	0	0	0	0	0	0.3	0.33	0	2507.99	40965	67912.1	87343.2	3.4	6	138	35.0787	45.9031	6.22845
23	41269	1	0	0	0	1	1	0	0	0	0	0	0	0	0.5	0.57	0.0327	12592.5	49893.2	73663.9	93385.4	2.8	10	274	35.0773	46.0742	41.2864
24	41278	1	0	0	0	0	0	0	0	0	0	0	0	0	0.3	-1.74	0.5631	21880.6	57745	79216.5	98802.6	2.6	10	242	35.0762	46.1926	29.4093
25	41522	1	0	0	0	1	0	1	0	0	0	0	0	0	0.5	0.18	0	28700	36434.7	64709	81803.9	2.8	10	275	35.0697	45.6135	32.3424
26	41541	1	0	0	0	1	1	1	0	0	0	0	0	0	0.3	0.34	0	5900	38385	65861.4	85136.4	4	7.9	143	35.0682	45.8635	6.70469
27	41806	1	0	0	0	1	0	1	0	0	0	0	0	0	0.3	0.09	0	33521.5	36680.9	64307.2	80699.2	2.5	8.5	187	35.0591	45.5607	24.0804
28	41825	1	0	0	0	1	0	1	0	0	0	0	0	0	0.4	0.34	0	10767.1	35672.5	63773.1	82763.5	2.7	8	190	35.0577	45.8108	15.9235
29	41827	1	0	0	0	1	1	1	0	0	0	0	0	0	0.5	0.34	0	8386.3	36405.1	64189.5	83341.5	2.8	10	177	35.0575	45.8371	16.2313
30	41835	1	0	0	0	1	1	0	0	0	0	0	0	0	0.6	0.33	0	670.82	40641.5	66697.9	86284.4	4.3	6	60	35.0567	45.9423	33.6242
31	41845	1	0	0	0	1	0	0	0	0	0	0	0	0	0.7	0.59	0.0255	11461.2	48155.3	71541.7	91259	3.1	10	272	35.0557	46.0739	40.2807
32	42112	1	0	0	0	1	0	0	0	0	0	0	0	0	0.3	0.34	0	12139.6	34199	62409.4	81327.2	3	8.8	160	35.047	45.7975	6.97618
33	42120	1	0	0	0	1	1	1	0	0	0	1	0	0	0.3	0.72	0	3008.32	37773.7	64452.5	83929.7	2.5	10	288	35.0462	45.9028	35.9749
34	42122	1	0	0	0	1	0	1	0	0	0	1	0	0	0.1	0.72	0	824.621	38986.8	65174.6	84737.9	2.6	10	315	35.046	45.9291	6.83298
35	42127	1	0	0	0	0	1	1	0	0	0	0	0	0	0.4	0.52	0	4561.8	42463.8	67321.1	87015.6	3.3	18.1	194	35.0455	45.9948	34.3737
36	42413	1	0	0	0	0	1	1	0	0	0	0	0	0	0.3	0.55	0	1878.83	40040.6	65290.5	84955.8	3.2	6	143	35.0349	45.9684	36.5232
37	42685	1	0	0	0	1	1	0	0	0	0	1	1	0	0.3	0.94	0.006	16208.6	31104.5	59618.5	78262.4	3.2	8	193	35.0256	45.7578	18.2151
38	42694	1	0	0	0	1	0	0	0	0	0	1	1	0	0.5	0.96	0	6174.14	34527.2	61491.2	80895.2	3.8	8	175	35.0248	45.8762	8.45838
39	42957	1	0	0	0	1	1	0	0	0	0	0	0	0	0.5	0.06	0	35214.9	32739.7	59883.6	75978.2	2.8	12	278	35.0159	45.5473	3.46466
40	42972	1	0	0	0	1	1	1	0	0	0	1	1	0	0.3	0.94	0.006	17708.8	29743.7	58330.5	76873.1	3.5	8	185	35.0148	45.7446	38.9015
41	42984	1	0	0	0	1	0	1	0	0	0	1	1	0	0.3	0.72	0	4472.14	34662.5	61009.3	80532.5	2.7	10	249	35.0138	45.9024	10.7163
42	43246	1	0	0	0	1	1	0	0	0	0	0	0	0	0.4	0.06	0	34265	31143.1	58441.5	74707.2	2.6	10	180	35.005	45.5604	3.43009
43	43263	1	0	0	0	1	0	1	0	0	0	1	1	0	0.4	1.1	0	14824.6	29251.5	57491.3	76381.4	3.9	6	150	35.0038	45.7839	15.9637
44	43269	1	0	0	0	1	1	0	0	0	0	1	1	0	0.3	0.96	0	8246.21	31844.2	58865	78244	2.9	10	217	35.0032	45.8628	6.47198
45	43270	1	0	0	0	1	1	1	1	1	0	1	1	0	0.2	1.43	0.215	7155.42	32411.9	59176.1	78614.3	3.2	8	206	35.0031	45.876	10.0448
46	43275	1	0	0	0	0	1	1	0	0	0	1	0	0	0.3	1.34	0	1835.76	35723	61062.3	80708.1	2.8	10	284	35.0026	45.9417	31.6722
47	43553	1	0	0	0	0	0	0	0	0	0	0	0	0	0.2	0.66	0.3827	13118.3	28817.5	56671.4	75769.4	2.9	10	280	34.9928	45.8101	4.81898
48	43555	1	0	0	0	1	1	0	1	1	0	1	1	0	0.6	1.43	0.215	10925.2	29719.5	57139.6	76400.3	3.1	8.3	183	34.9926	45.8364	11.4532
49	43563	1	0	0	0	0	1	1	0	0	0	1	0	0	0.3	1.34	0	2416.61	34780	59943.7	79600.3	3	6	183	34.9918	45.9416	26.6716
50	44122	1	0	0	0	1	0	0	0	0	0	0	0	0	0.2	0.38	0.2158	21770.6	24739.6	53421.1	71757.6	3.8	11.1	158	34.9717	45.7179	11.4227
51	44127	1	0	0	0	0	1	0	0	0	0	0	0	0	0.4	0.66	0.3827	16287.4	25784.7	53924.1	72869.5	2.5	17.9	254	34.9713	45.7836	10.0751
52	44132	1	0	0	0	1	1	0	1	1	0	1	1	0	0.2	1.43	0.215	10890.8	28100.7	55080	74449.7	3.7	8	209	34.9709	45.8493	2.58588
53	44133	1	0	0	0	1	0	1	1	1	0	1	1	0	0.3	1.43	0.215	9848.86	28692.3	55386.4	74819.5	4	8	133	34.9708	45.8625	12.9682
54	44423	1	0	0	0	1	1	0	1	0	0	1	1	0	0.3	1.77	0.0463	8364.81	29004.3	54929.5	74485.2	3.1	11.8	176	34.9598	45.8887	4.00134
55	44702	1	0	0	0	1	0	1	0	0	1	0	0	0	0.5	0.21	0.3869	18380.7	23145.8	51387.6	70263.8	2.9	8	161	34.9498	45.7703	40.0467
56	44703	1	1	0	1	1	0	1	0	0	1	0	0	0	0.4	-1.72	1.1267	17308.1	23495.7	51548.5	70533.1	3.4	8.9	184	34.9497	45.7834	25.4738
57	44704	1	1	1	1	1	1	1	0	0	1	1	1	0	0.4	-1.84	1.3055	16249.6	23900.8	51736.7	70821.8	2.8	16.5	192	34.9496	45.7966	17.8074
58	44708	1	0	0	0	1	0	0	1	1	1	0	0	0	0.4	-0.63	1.0452	12083	26016.3	52756.5	72164.5	2.5	10	284	34.9492	45.8491	14.7829
59	44712	1	0	0	0	1	1	0	1	1	0	1	1	0	0.5	0.7	0.6045	7925.91	28784.2	54183.9	73795.7	3.4	6	175	34.9489	45.9017	13.8432
60	44714	1	0	0	0	1	1	0	1	1	0	1	0	0	0	0.7	0.6045	5907.62	30358.7	55040.8	74713.6	2.5	17.8	281	34.9487	45.928	1.95791
61	44737	1	0	0	0	0	1	0	0	0	0	0	0	0	0.4	-0.56	0.2508	15720.7	53060.1	70241.7	89318.5	2.7	10	223	34.946	46.2302	15.9708
62	44990	1	1	0	1	1	0	0	0	0	1	0	0	0	0.4	-1.72	1.1267	18930.7	21992	50196.9	69092.7	4.1	12	185	34.9389	45.7702	53.5425
63	44992	1	1	1	1	1	1	0	0	0	1	1	1	0	0.6	-1.84	1.3055	16844	22785.3	50554.2	69660	2.9	10	249	34.9388	45.7965	20.0707
64	45002	1	0	0	0	1	1	0	1	1	0	1	0	0	0.4	0.7	0.6045	6603.03	29488.5	53930.8	73613.3	2.5	7.2	141	34.9378	45.9278	4.12141
65	45014	1	0	0	0	1	1	1	0	0	0	0	0	0	0.4	0.47	0.1462	4500	40834.4	60926.6	80490.7	2.8	8	229	34.9365	46.0855	34.6861
66	45278	1	1	1	1	1	0	0	0	0	1	0	0	0	0.5	-1.72	1.1267	19523.3	20843.5	49006.6	67922.6	2.7	9.8	185	34.9281	45.7701	8.33152
67	45285	1	0	0	0	1	0	0	1	1	1	0	0	0	0.4	-0.63	1.0452	12245	24681.4	50774.5	70280.9	2.5	10	242	34.9275	45.862	7.01107
68	45288	1	0	0	0	1	1	1	1	1	0	1	1	0	0.4	0.7	0.6045	9261.75	26967.6	51931.2	71570.1	2.6	8	238	34.9272	45.9015	3.88221
69	45554	1	0	0	0	0	1	1	0	0	1	0	0	0	0.2	0.54	0.0125	32980.1	20418.9	48087.1	65004.9	2.6	10	287	34.9182	45.6123	0.443327
70	45561	1	0	0	1	1	1	0	0	0	1	0	0	0	0.2	-0.43	0.6181	25357.6	18701.1	47400.9	65647.9	2.7	7.5	278	34.9177	45.7043	4.43871
71	45565	1	1	1	1	1	0	1	0	0	1	0	0	0	0.7	-1.72	1.1267	21163.2	19356.9	47673.6	66490.6	4.2	12	117	34.9174	45.7568	9.31717
72	45570	1	1	1	1	1	1	0	0	0	1	1	1	0	0.3	-1.84	1.3055	15966.5	21695.4	48682.3	68007.4	2.9	10	243	34.917	45.8225	21.6088
73	45573	1	0	0	0	1	0	1	1	1	1	0	0	0	0.3	-0.63	1.0452	12896.9	23724.5	49627.1	69151.7	2.7	8	189	34.9167	45.8619	8.4263
74	45574	1	0	0	0	1	1	0	1	1	1	0	0	0	0.4	-0.63	1.0452	11903.8	24481.2	49995.7	69570.4	2.8	6	178	34.9166	45.8751	12.23
75	45596	1	0	0	0	0	0	0	0	0	0	0	0	0	0.3	-0.19	0.2275	8845.9	46106.9	63529.9	82743.2	2.7	9	299	34.9142	46.164	34.7842
76	45850	1	0	0	1	1	1	1	0	0	1	0	0	0	0.4	-0.43	0.6181	24884.5	17555.9	46224.3	64642.1	2.5	8	254	34.9068	45.7173	14.5739
77	45851	1	0	0	1	1	0	1	0	0	1	0	0	0	0.2	-0.43	0.6181	23840.3	17692.1	46278.8	64846	2.9	8	286	34.9067	45.7305	0
78	45853	1	1	1	1	1	0	0	0	0	1	0	0	0	0.3	-1.72	1.1267	21756.8	18200.3	46480.6	65318	3.2	8.2	151	34.9066	45.7567	11.7794
79	45858	1	1	1	1	1	1	0	0	0	1	1	1	0	0.2	-4.46	2.3192	16568	20670	47514.7	66861.4	2.7	10	243	34.9061	45.8224	6.38145
80	45859	1	1	1	1	1	1	0	0	0	1	1	1	0	0.5	-4.46	2.3192	15559.6	21332.8	47809.3	67230.1	3	8	140	34.906	45.8355	9.96548
81	45861	1	1	1	1	1	1	0	1	1	1	1	1	0	0.5	-3.43	2.0961	13580.1	22790.6	48482.3	68025	2.5	10	239	34.9059	45.8618	6.32807
82	45862	1	1	1	1	1	1	1	1	1	1	1	1	0	0.1	-3.43	2.0961	12601.6	23577.3	48859.5	68450.6	2.5	10	281	34.9058	45.8749	2.91717
83	45864	1	1	1	1	1	0	1	1	1	1	1	1	0	0.5	-1.32	1.4142	10640	25246.2	49692.4	69356.2	2.9	10	142	34.9056	45.9012	6.82422
84	45878	1	0	0	0	0	1	1	0	0	0	0	0	0	0.4	0.34	0.2348	2441.31	39086.7	58021.1	77501.2	2.9	8	226	34.9041	46.0851	37.9401
85	45888	1	0	0	0	0	1	0	0	0	0	0	0	0	0.4	-0.5	0.218	11604.3	50093.6	65974.9	84890.8	2.5	10	251	34.9028	46.2164	36.2916
86	46147	1	1	1	1	1	1	1	0	0	1	1	1	0	0.6	-4.46	2.3192	16229	20360	46650.7	66092.4	3.2	6	183	34.8952	45.8354	5.36415
87	46148	1	1	1	1	1	1	1	1	1	1	1	1	0	0.4	-3.43	2.0961	15255.2	21100.9	46981.4	66487	3.1	18.1	180	34.8951	45.8486	19.9541
88	46149	1	1	1	1	1	0	0	1	1	1	1	1	0	0.3	-3.43	2.0961	14280.1	21882.6	47340.2	66900.8	2.5	10	136	34.895	45.8617	4.47102
89	46150	1	1	1	1	1	0	0	1	1	1	1	1	0	0.3	-3.43	2.0961	13288	22700.9	47726.4	67333.5	3.2	7.7	178	34.8949	45.8748	8.91159
90	46163	1	0	0	0	0	0	1	0	0	0	0	0	0	0.3	0.61	0.3623	1081.67	35336.2	54929.5	74504.5	2.7	8.1	274	34.8936	46.0455	16.4341
91	46177	1	0	0	0	0	1	0	0	0	0	0	0	0	0.2	-0.26	0.146	11667.5	50819	66009.5	84797.4	2.6	10	213	34.8919	46.2294	29.3137
92	46416	1	0	0	0	0	1	1	0	0	1	1	1	0	0.2	0.82	0.0108	36640	18449.1	45041	61420.8	2.5	8.6	286	34.8859	45.5858	6.14501
93	46427	1	0	0	1	0	0	0	1	1	1	0	0	0	0.3	-0.58	0.9132	25030.6	15322.2	43883.1	62486.2	2.7	10	251	34.8851	45.7303	20.2613
94	46464	1	0	0	0	0	0	0	0	0	0	0	0	0	0.3	-0.26	0.146	9970.46	49301.6	64313.4	83102.1	3.4	6.4	101	34.8812	46.2161	36.258
95	46711	1	0	0	1	0	0	1	0	0	1	1	1	0	0.4	0.99	0.2289	29793.5	14073	42651.7	60582.8	2.5	10	273	34.8746	45.6777	3.33102
96	46716	1	1	1	1	1	0	1	0	0	1	1	1	0	0.3	-3.17	1.8172	24596.3	14410.1	42778.1	61545.8	3	11.8	188	34.8742	45.7433	33.8791
97	46722	1	1	1	1	1	0	1	0	0	1	1	1	0	0.1	-4.46	2.3192	18601.1	17726	44022.4	63435.3	3.7	8	141	34.8737	45.8221	12.9891
98	46724	1	1	1	1	1	0	0	1	1	1	1	1	0	0.3	-3.43	2.0961	16640	19307.3	44687.9	64232.4	2.6	10	236	34.8735	45.8483	26.0925
99	46725	1	1	1	1	1	1	0	1	1	1	1	1	0	0.3	-3.43	2.0961	15660.5	20155.6	45065	64660.7	2.6	8	236	34.8734	45.8615	3.24173
100	46733	1	0	0	0	1	1	1	1	1	0	0	0	0	0.2	-0.35	1.0922	8246.21	27871.3	49043.3	68747.9	2.6	24	276	34.8726	45.9665	5.36897
101	47005	1	1	1	1	1	0	1	0	0	1	1	1	0	0.2	-3.17	1.8172	24212.8	13648.8	41712.9	60638.3	3.3	15	187	34.8633	45.7563	28.8556
102	47006	1	1	1	1	1	0	1	0	0	1	1	1	0	0.5	-3.17	1.8172	23214.2	14132.6	41876.6	60926.5	2.6	10	318	34.8632	45.7695	15.6719
103	47007	1	1	1	1	1	0	0	0	0	1	1	1	0	0.4	-3.17	1.8172	22226.6	14698.6	42073.9	61236.9	2.7	10	145	34.8631	45.7826	12.4744
104	47010	1	1	1	1	1	1	0	1	1	1	1	1	0	0.4	-5.55	2.9839	19285.5	16801.5	42862.2	62297.7	4	8	140	34.8629	45.822	13.5442
105	47011	1	1	1	1	1	0	1	1	1	1	1	1	0	0.3	-5.55	2.9839	18309.8	17610.5	43188.5	62693.2	3.9	6.4	137	34.8628	45.8351	8.20587
106	47014	1	1	1	1	1	1	1	1	1	1	1	1	0	0.3	-5.07	2.8769	15380.8	20256.6	44348.3	64000.3	3.7	8.2	133	34.8625	45.8745	3.65355
107	47015	1	1	1	1	1	0	1	1	1	1	1	1	0	0.5	-5.07	2.8769	14430.9	21200.2	44792.5	64474.8	2.6	8	132	34.8624	45.8876	6.40158
108	47017	1	1	1	1	1	1	1	1	1	1	1	1	0	0.5	-2.62	2.0401	12606.3	23158.8	45762.5	65479.5	3.8	7.2	128	34.8622	45.9139	9.60667
109	47282	1	0	0	1	0	0	1	0	0	1	1	1	0	0.3	0.82	0.0108	36193.4	14124.1	41007.9	57805.5	2.5	10	323	34.8533	45.6119	8.86878
110	47284	1	0	0	1	0	0	0	0	0	1	1	1	1	0.1	0.99	0.2289	34111.6	12879.8	40602.1	57888.5	2.5	10	259	34.8531	45.6381	3.38285
111	47289	1	0	0	1	0	0	0	1	1	1	0	0	1	0.3	-0.58	0.9132	28915.4	11501.7	40201.1	58527.6	2.9	12	285	34.8528	45.7037	2.08806
112	47293	1	1	1	1	1	1	1	1	1	1	1	1	1	0.6	-3.07	2.1529	24880.9	12539.9	40522.2	59471.3	2.5	8	244	34.8525	45.7562	32.8905
113	47294	1	1	1	1	1	0	1	1	1	1	1	1	1	0.4	-3.07	2.1529	23901.9	13064.8	40690.7	59765.2	2.6	10	243	34.8524	45.7694	19.6996
114	47295	1	1	1	1	1	1	1	1	1	1	1	1	0	0.5	-3.07	2.1529	22924.2	13675.2	40893.6	60081.6	3.3	8	185	34.8523	45.7825	15.889
115	47298	1	1	1	1	1	0	1	1	1	1	1	1	0	0.7	-5.55	2.9839	19983.2	15913.8	41704.3	61162.4	3	11.5	183	34.852	45.8219	8.93898
116	47300	1	1	1	1	1	1	1	1	1	1	1	1	0	0.4	-5.55	2.9839	18020.5	17647.9	42406.3	61988.7	4.4	12	181	34.8518	45.8481	13.7469
117	47301	1	1	1	1	1	1	1	1	1	1	1	1	0	0.7	-5.07	2.8769	17060.2	18569.1	42803.4	62432.4	2.7	10	255	34.8518	45.8612	4.88121
118	47302	1	1	1	1	1	1	0	1	1	1	1	1	0	0.4	-5.07	2.8769	16119.9	19520.5	43230.2	62895.8	3.3	8	132	34.8517	45.8744	5.1584
119	47303	1	1	1	1	1	1	1	1	1	1	1	1	0	0.4	-5.07	2.8769	15211.8	20498	43685.8	63378.5	2.5	10	230	34.8516	45.8875	12.8006
120	47323	1	0	0	0	1	1	1	0	0	0	0	0	0	0.6	0.17	0.1708	3140.06	42513.2	57489.9	76425.4	4.4	8.2	75	34.8494	46.15	9.96225
121	47569	1	0	0	1	1	1	0	0	0	1	1	1	0	0.1	1.03	0	37831.9	13944.5	40093.5	56601.4	2.6	8.5	281	34.8425	45.5987	8.23759
122	47570	1	0	0	1	1	1	1	0	0	1	1	1	1	0.3	1.03	0	36789.8	13165.5	39832.3	56605.7	3	13.3	171	34.8424	45.6118	6.87005
123	47571	1	0	0	1	1	1	1	0	0	1	1	1	1	0.5	1.03	0	35746.9	12453.5	39605.7	56635.3	2.9	10	204	34.8424	45.6249	17.2725
124	47576	1	0	0	1	0	1	1	1	1	1	1	1	1	0.1	1.8	0.1662	30561.7	10348.4	39010.4	57162.6	2.5	9.9	284	34.842	45.6905	15.8084
125	47578	1	0	0	1	1	0	0	1	1	1	0	0	1	0.3	0.35	0.9471	28539.4	10394.7	39028.8	57547.5	3.6	8.4	155	34.8419	45.7168	5.96006
126	47580	1	0	0	1	1	1	1	1	1	1	0	0	1	0.2	0.35	0.9471	26551.5	10978.6	39194.5	58029.3	2.7	10	151	34.8417	45.743	4.73255
127	47587	1	1	1	1	1	0	0	1	1	1	1	1	0	0.2	-5.55	2.9839	19700.3	15955.3	40893.6	60440.1	3.3	8.2	191	34.8411	45.8349	1.90583
128	47588	1	1	1	1	1	0	0	1	1	1	1	1	0	0.5	-5.55	2.9839	18742.7	16883.4	41270.4	60871.3	3	10	181	34.841	45.848	12.5808
129	47590	1	1	1	1	1	1	1	1	1	1	1	1	0	0.5	-5.07	2.8769	16900.9	18832.2	42116.6	61794.8	2.5	15.2	227	34.8408	45.8743	2.67966
130	47592	1	1	1	1	1	1	0	1	1	1	1	1	0	0.4	-5.07	2.8769	15109.3	20875.1	43080	62796.5	3.1	8.3	178	34.8407	45.9005	15.5984
131	47618	1	0	0	0	0	1	0	0	0	0	0	0	0	0.4	0.07	0.0548	8438.6	50385	63001.3	81325.1	2.5	10	300	34.8376	46.2417	19.4569
132	47860	1	0	0	1	1	1	1	0	0	1	1	1	1	0.2	1.03	0	35311.9	10791.2	38227.3	55492.3	3.4	9	196	34.8315	45.6379	7.86889
133	47862	1	0	0	1	0	0	0	1	1	1	1	1	1	0.3	1.8	0.1662	33236.4	9714.42	37943.8	55682.3	2.5	10	230	34.8314	45.6642	1.98095
134	47866	1	0	0	1	1	1	1	1	1	1	0	0	1	0.5	0.35	0.9471	29207.2	9207.06	37829.8	56367.7	3	16	246	34.8311	45.7167	1.89661
135	47867	1	0	0	1	1	1	0	1	1	1	0	0	1	0.3	0.35	0.9471	28225.2	9464.14	37896.3	56601.4	4.5	10.6	226	34.831	45.7298	10.3453
136	47873	1	1	1	1	1	0	0	1	1	1	1	1	0	0.4	-5.55	2.9839	22343.2	13369	39074.9	58503	3	6.5	185	34.8305	45.8085	14.3818
137	47874	1	1	1	1	1	0	1	1	1	1	1	1	0	0.2	-5.55	2.9839	21380.6	14263.6	39396.1	58899.6	3.8	11	184	34.8304	45.8217	6.62672
138	47877	1	1	1	1	1	0	1	1	1	1	1	1	0	0.2	-5.07	2.8769	18591.4	17172.4	40557.7	60217.3	2.5	9	259	34.8301	45.861	5.33335
139	47878	1	1	1	1	1	1	0	1	1	1	1	1	0	0.5	-5.07	2.8769	17691.8	18197	41007.9	60697.6	4.3	27.4	110	34.83	45.8741	18.7391
140	48147	1	0	0	1	1	1	0	0	0	1	1	1	1	0.2	1.03	0	36950	10555.1	37244.7	54236.9	2.6	9	260	34.8207	45.6247	1.72507
141	48153	1	0	0	1	1	0	1	1	1	1	0	0	1	0.4	0.35	0.9471	30876.9	7902.53	36601.2	54975.3	2.6	8	299	34.8203	45.7035	40.9935
142	48156	1	0	0	1	1	0	1	1	1	1	0	0	1	0.3	0.35	0.9471	27935.8	8766.41	36807.2	55690.9	2.7	10	260	34.8201	45.7428	2.25748
143	48158	1	1	1	1	1	0	1	1	1	1	1	1	1	0.3	-3.07	2.1529	25982.5	10042.4	37138.3	56291	2.9	10	143	34.8199	45.7691	17.0482
144	48163	1	1	1	1	1	0	1	1	1	1	1	1	0	0.3	-5.55	2.9839	21194.6	14505.5	38611.5	58198.6	3.4	9.1	183	34.8195	45.8347	14.57
145	48166	1	1	1	1	1	0	1	1	1	1	1	1	0	0.2	-5.42	3.2837	18494.6	17620.7	39904.5	59604.4	2.9	8	226	34.8192	45.874	6.82409
146	48167	1	1	1	1	1	1	0	1	1	1	1	1	0	0.4	-5.42	3.2837	17610.5	18697.9	40397.6	60113.6	2.9	8	128	34.8191	45.8872	8.31991
147	48171	1	1	1	1	1	0	1	1	1	1	1	1	0	0.2	-2.8	2.335	13756.8	23127.7	42651.7	62340	2.9	14.6	174	34.8187	45.9396	13.3497
148	48173	1	0	0	0	0	0	1	1	1	1	0	0	0	0.3	-0.07	1.1785	11800.4	25393.1	43932.3	63560.1	2.5	12	219	34.8185	45.9659	12.2293
149	48425	1	0	0	0	0	1	0	0	0	1	0	0	0	0.3	0.11	0.0424	47953	20146.7	40129.4	53935.1	2.6	11.4	293	34.8105	45.4935	5.82666
150	48447	1	1	1	1	1	1	0	1	1	1	1	1	1	0.4	-2.27	2.2568	25700.2	9976.47	36185.8	55479.4	2.8	1.8	149	34.809	45.7821	14.5684
151	48449	1	1	1	1	1	0	1	1	1	1	1	1	1	0.5	-5.46	3.3051	23802.7	11846.1	36758.3	56235.6	2.9	10	185	34.8088	45.8083	28.0263
152	48450	1	1	1	1	1	1	0	1	1	1	1	1	1	0.2	-5.46	3.3051	22887.8	12847.2	37099.5	56648	3	7.4	184	34.8088	45.8214	3.43662
153	48457	1	1	1	1	1	1	1	1	1	1	1	1	0	0.1	-2.8	2.335	16419.5	20462.9	40415.5	60129.5	2.8	10.5	222	34.8081	45.9133	23.107
154	48460	1	1	1	1	1	1	1	1	1	1	1	1	0	0.2	-2.8	2.335	13479.2	23888.3	42270.2	61911.2	2.9	15.7	130	34.8078	45.9526	19.1704
155	48718	1	0	0	1	1	1	1	0	0	1	0	0	0	0.2	0.19	0.0424	43340.2	14115.6	36552	51954.2	2.7	10	183	34.7994	45.559	14.9491
156	48719	1	0	0	1	1	1	1	0	0	1	0	0	1	0.4	0.19	0.0424	42309	13018.8	36146	51875.6	2.7	10	324	34.7994	45.5721	12.0214
157	48724	1	0	0	1	1	1	1	0	0	1	1	1	1	0.2	1.11	0	37192.7	7993.12	34671.7	51898.7	2.6	8.3	238	34.799	45.6377	1.27029
158	48732	1	0	1	1	1	1	1	1	1	1	1	1	1	0.3	1.42	0.8844	29320.6	6685.06	34421.6	53358	3.2	9.1	189	34.7984	45.7426	10.1316
159	48733	1	1	1	1	1	0	1	1	1	1	1	1	1	0.2	-2.27	2.2568	28342.5	7433.03	34578.2	53658.6	4	8	146	34.7984	45.7557	7.92705
160	48735	1	1	1	1	1	0	1	1	1	1	1	1	1	0.3	-2.27	2.2568	26425.9	9200.54	35012.7	54334.2	2.7	10	298	34.7982	45.782	4.33348
161	48737	1	1	1	1	1	0	0	1	1	1	1	1	1	0.3	-5.46	3.3051	24581.5	11200.4	35604.1	55106.1	3.1	8	185	34.798	45.8082	19.5269
162	48738	1	1	1	1	1	0	1	1	1	1	1	1	1	0.4	-5.46	3.3051	23668.5	12254.4	35956.2	55526.9	4.4	5.5	136	34.7979	45.8213	2.90973
163	49009	1	0	0	1	1	1	1	0	0	1	1	1	1	0.5	1.11	0	40863.9	10336.8	34285.4	50601.6	2.8	10	174	34.7884	45.5983	7.12602
164	49010	1	0	0	1	1	1	1	0	0	1	1	1	1	0.2	1.11	0	39856	9259.05	33979.6	50606.3	3.1	9	205	34.7883	45.6114	2.92637
165	49012	1	0	0	1	1	1	1	0	0	1	1	1	1	0.4	1.11	0	37860	7220.11	33488.7	50701.1	3.3	8.6	166	34.7882	45.6376	1.74396
166	49016	1	1	1	1	1	0	1	1	1	1	1	1	1	0.5	2.47	0.0902	33933	4414.75	33012.3	51228.5	2.5	8	247	34.7879	45.6901	4.09657
167	49023	1	1	1	1	1	0	1	1	1	1	1	1	1	0.3	-2.27	2.2568	27182.5	8523.5	33841.5	53191.4	2.5	10	279	34.7874	45.7819	7.48212
168	49026	1	1	1	1	1	0	1	1	1	1	1	1	1	0.2	-5.46	3.3051	24476.1	11754.6	34816.8	54409.2	3.3	6.2	134	34.7871	45.8212	5.21159
169	49036	1	1	1	1	1	0	1	1	1	1	1	1	0	0.2	-2.8	2.335	14948.2	23318.9	40281.6	59869.5	2.8	10	214	34.7862	45.9524	1.05347
170	49051	1	0	0	0	1	1	1	0	0	0	0	0	0	0.2	0.61	0	1769.18	41066.9	52693.5	71136.2	2.5	12	320	34.7845	46.1491	26.1688
171	49299	1	0	0	1	1	0	1	0	0	1	1	1	1	0.5	1.11	0	39528.5	7655.72	32540	49440.5	3.1	10.7	199	34.7775	45.6244	7.03237
172	49301	1	1	1	1	1	1	1	1	1	1	1	1	1	0.3	2.47	0.0902	37571.3	5547.07	32116.8	49595.6	2.9	9	171	34.7773	45.6506	3.05895
173	49305	1	0	1	1	1	1	1	1	1	1	1	1	1	0.3	1.42	0.8844	33646.7	3106.44	31801.4	50249.4	2.7	8.6	297	34.777	45.7031	6.16552
174	49307	1	0	1	1	1	0	1	1	1	1	1	1	1	0.4	1.42	0.8844	31700.2	4045.99	31914.4	50743.7	3	8	203	34.7769	45.7293	0.23697
175	49308	1	0	1	1	1	1	1	1	1	1	1	1	1	0.4	1.42	0.8844	30741.7	4891.83	32038.3	51031.4	2.5	10	280	34.7768	45.7424	0.634606
176	49309	1	1	1	1	1	0	1	1	1	1	1	1	1	0.4	-2.27	2.2568	29798.2	5852.35	32206.4	51345.5	7.3	18.1	82	34.7767	45.7556	15.0961
177	49310	1	1	1	1	1	0	1	1	1	1	1	1	1	0.5	-2.27	2.2568	28873.7	6888.4	32418.1	51685.6	2.8	8	250	34.7766	45.7687	15.7501
178	49312	1	1	1	1	1	0	1	1	1	1	1	1	1	0.3	-2.27	2.2568	27056.2	9082.4	32968.6	52441.6	3	7.5	185	34.7765	45.7949	3.28176
179	49314	1	1	1	1	1	1	1	1	1	1	1	1	1	0.2	-5.46	3.3051	25272.3	11360	33681.6	53295	3.1	7.5	184	34.7763	45.8211	0.591101
180	49315	1	1	1	1	1	0	1	1	1	1	1	1	1	0.3	-5.46	3.3051	24379.1	12516	34095.9	53756.9	2.8	9	225	34.7762	45.8342	4.37672
181	49317	1	1	1	1	1	0	0	1	1	1	1	1	0	0.3	-5.42	3.2837	22410	14848.9	35033.3	54747.8	3.2	7.5	129	34.776	45.8605	3.04661
182	49340	1	0	0	0	1	1	1	0	0	0	0	0	0	0.3	0.61	0	1562.05	42037.4	52900.4	71143.9	2.7	7.2	259	34.7735	46.1621	36.6961
183	49588	1	0	0	1	1	1	1	0	0	1	1	1	1	0.3	1.11	0	39245.9	6103.28	31126.4	48306.1	2.8	10	236	34.7666	45.6374	1.83451
184	49593	1	0	1	1	1	0	1	1	1	1	1	1	1	0.3	1.42	0.8844	34342.1	1910.5	30601.5	49070.2	3.2	11.3	154	34.7662	45.703	7.86648
185	49595	1	0	1	1	1	1	1	1	1	1	1	1	1	0.3	1.42	0.8844	32424.8	3201.56	30718.9	49576.2	3.2	11	191	34.7661	45.7292	0.392906
186	49596	1	0	1	1	1	0	1	1	1	1	1	1	1	0.3	1.42	0.8844	31486	4205.95	30847.5	49870.6	3.5	11	144	34.766	45.7423	0.699411
187	49598	1	1	1	1	1	0	1	1	1	1	1	1	1	0.5	-2.27	2.4332	29654.7	6419.5	31241.8	50539.9	2.7	8.7	226	34.7658	45.7686	42.5421
188	49599	1	1	1	1	1	0	1	1	1	1	1	1	1	0.3	-2.27	2.4332	28750.7	7569.02	31505.7	50913.7	2.7	10	139	34.7657	45.7817	5.49163
189	49600	1	1	1	1	1	1	1	1	1	1	1	1	1	0.4	-2.27	2.4332	27864.9	8732.13	31812.7	51312.8	3.7	8.1	187	34.7656	45.7948	6.33387
190	49601	1	1	1	1	1	0	0	1	1	1	0	1	1	0.5	-5.66	3.568	26967.6	9904.04	32161.6	51736.6	2.7	8	226	34.7656	45.8079	3.52934
191	49605	1	1	1	1	1	1	0	1	1	1	0	0	0	0.6	-5.66	3.568	23100.9	14632.8	33947.8	53667.5	4.2	8.6	89	34.7652	45.8603	19.9322
192	49610	1	1	1	1	1	0	1	1	1	1	1	1	0	0.3	-2.71	2.4581	18337.1	20550.7	36943.9	56563.2	2.9	10	119	34.7647	45.9259	7.90316
193	49626	1	0	0	0	1	1	1	0	0	0	0	0	0	0.4	0.61	0	4186.88	39474.2	50264.6	68589.9	2.7	10	327	34.7629	46.1357	6.92917
194	49631	1	0	0	0	0	0	0	0	0	0	0	0	0	0.2	0.38	0	412.311	44903.7	55137.4	72972.5	2.6	9.2	229	34.7623	46.2012	1.79936
195	49875	1	0	0	1	1	0	1	0	0	1	1	1	1	0.2	1.11	0	40913.7	7034.91	30198.8	47042.5	3.8	8.1	200	34.7558	45.6242	1.54116
196	49877	1	0	0	1	1	1	1	0	0	1	1	1	1	0.2	1.19	0.0193	38955	4652.96	29742.4	47205.5	2.9	10	322	34.7557	45.6505	4.68079
197	49879	1	1	1	1	1	1	1	1	1	1	1	1	1	0.4	2.63	0.1137	36990	2308.68	29474.9	47489.4	3.6	8.2	158	34.7555	45.6767	3.4724
198	49881	1	1	1	1	1	1	1	1	1	1	1	1	1	0.5	2.63	0.1137	35060.1	728.011	29401.5	47892	3.9	9.2	190	34.7554	45.7029	6.11798
199	49882	1	1	1	1	1	0	1	1	1	1	1	1	1	0.4	1.58	0.9602	34109.4	1526.43	29438.2	48136.9	2.5	9.4	320	34.7553	45.716	0.902422
200	49886	1	1	1	1	1	0	1	1	1	1	1	1	1	0.1	-2.27	2.4332	30445.4	6152.24	30067.4	49396.8	2.6	10	230	34.755	45.7685	35.0802
201	49890	1	1	1	1	1	1	1	1	1	1	0	1	1	0.3	-5.66	3.568	26736.7	10885.3	31425.6	51078.4	2.5	10	132	34.7546	45.8209	4.42022
202	49892	1	1	1	1	1	1	1	1	1	1	0	0	1	0.4	-5.66	3.568	24773.6	13251.8	32351.4	52065	2.5	11.1	232	34.7545	45.8471	6.61957
203	49893	1	1	1	1	1	0	1	1	1	1	0	0	0	0.4	-5.66	3.568	23799.4	14436.1	32870.2	52592.4	3.3	8.6	125	34.7544	45.8602	4.93402
204	49905	1	0	0	0	0	0	1	1	1	0	0	0	0	0.6	0.44	1.1331	12881.8	28622.5	41366.3	60440.1	2.6	10	304	34.7532	46.0175	9.19294
205	49917	1	0	0	0	0	0	0	0	0	0	0	0	0	0.3	0.46	0	2126.03	42283.4	52476.8	70382.5	2.9	9	258	34.7517	46.1749	34.4534
206	50155	1	0	0	0	0	1	0	0	0	1	0	0	0	0.5	0.13	0.0955	49515.5	16604.8	32672.5	46426.3	3.5	10	275	34.7455	45.5193	2.86481
207	50164	1	0	0	1	1	1	1	0	0	1	1	1	1	0.3	1.19	0.0193	40628.7	5813.78	28770.3	45911.7	2.7	7.4	284	34.7449	45.6373	5.8479
208	50173	1	1	1	1	1	0	1	1	1	1	1	1	1	0.4	1.58	0.9602	32140.3	4767.6	28657.5	47892	3.4	8.9	141	34.7443	45.7553	0.813114
209	50174	1	1	1	1	1	0	1	1	1	1	1	1	1	0.3	-2.27	2.4332	31250.8	5953.99	28895.2	48256.4	2.8	10	197	34.7442	45.7684	3.80262
210	50178	1	1	1	1	1	0	1	1	1	1	0	1	1	0.4	-5.66	3.568	27423.5	10688.8	30305.9	49976.4	2.5	10	275	34.7438	45.8208	0.977243
211	50180	1	1	1	1	1	1	1	1	1	1	0	0	1	0.3	-5.66	3.568	25470.2	13054.1	31264.8	50984.3	2.8	10	126	34.7436	45.847	2.27293
212	50181	1	1	1	1	1	0	1	1	1	1	0	0	0	0.3	-5.66	3.568	24500	14239.4	31801.4	51522.8	2.6	10	233	34.7436	45.8601	8.03779
213	50187	1	1	1	1	1	0	0	1	1	1	1	1	0	0.5	-2.71	2.4581	19031.8	21323.5	35705	55193.1	2.8	5	125	34.743	45.9388	17.87
214	50205	1	0	0	0	0	0	1	0	0	0	0	0	0	0.1	0.46	0	2900	41522.6	51811.7	69585.2	2.6	10	283	34.7409	46.1747	22.9092
215	50211	1	0	0	0	0	1	0	0	0	0	0	1	0	0.4	0.17	0	2475.88	46331.1	57976.3	75146.9	2.6	8	101	34.7401	46.2533	21.1646
216	50440	1	0	0	0	0	1	1	0	0	1	0	0	0	0.4	-0.29	0.1409	53202.4	20263.3	33660.2	45984.8	2.6	15.3	289	34.7348	45.4799	6.90911
217	50451	1	0	0	1	1	1	1	0	0	1	1	1	1	0.3	1.19	0.0193	42299.2	7170.08	27867.7	44644.8	3.5	7.5	166	34.7342	45.6241	14.0433
218	50453	1	0	0	1	1	1	1	0	0	1	1	1	1	0.6	1.19	0.0193	40341.8	4805.21	27372.4	44816.5	4.2	15	124	34.734	45.6503	4.61924
219	50454	1	1	1	1	1	1	1	1	1	1	1	1	1	0.2	2.63	0.1137	39380.3	3622.15	27200.9	44950.2	3.2	9.1	166	34.734	45.6634	5.62315
220	50455	1	1	1	1	1	1	1	1	1	1	1	1	1	0.3	2.63	0.1137	38424.1	2433.1	27081.5	45115.4	2.8	10	330	34.7339	45.6765	2.34891
221	50456	1	1	1	1	1	1	1	1	1	1	1	1	1	0.5	2.63	0.1137	37481.9	1264.91	27015	45311.8	3	11.2	194	34.7338	45.6896	2.05174
222	50458	1	1	1	1	1	1	1	1	1	1	1	1	1	0.4	1.58	0.9602	35643.9	1019.8	27041.6	45796.5	4.2	11.2	144	34.7337	45.7158	1.80551
223	50461	1	1	1	1	1	1	1	1	1	1	1	1	1	0.4	1.58	0.9602	32944.3	4570.56	27477.4	46745.7	2.5	10	278	34.7334	45.7552	0.30099
224	50464	1	1	1	1	1	0	1	1	1	1	1	1	1	0.2	-2.27	2.4332	30074.1	8121.58	28367.1	47947.1	3	8	187	34.7332	45.7945	3.75258
225	50466	1	1	1	1	1	0	0	1	1	1	0	1	1	0.3	-5.66	3.568	28122.1	10473.8	29192.6	48879	2.7	8	128	34.733	45.8207	2.04587
226	50470	1	1	1	1	0	0	0	1	1	1	0	0	0	0.5	-5.64	3.5367	24318.1	15206.9	31333.8	51031.4	2.7	6	212	34.7326	45.8731	4.75737
227	50494	1	0	0	0	1	0	1	0	0	0	0	0	0	0.2	0.26	0	2758.62	41382.4	52187.8	69716.1	3.1	11.4	159	34.73	46.1877	26.6319
228	50497	1	0	0	0	1	1	1	0	0	0	0	0	0	0.4	0.26	0	0	43817.9	55296	72515.5	2.6	19	229	34.7296	46.227	23.1349
229	50733	1	0	0	1	0	1	1	0	0	1	0	0	0	0.1	0.13	0.0955	48870.6	14468.2	29401.5	43710.4	2.9	8	325	34.7237	45.5454	4.33421
230	50734	1	0	0	1	1	1	1	0	0	1	0	0	1	0.4	0.15	0.1026	47894.1	13283.4	28845.3	43583.9	2.9	10	268	34.7237	45.5585	3.74378
231	50737	1	0	0	1	1	1	0	0	0	1	0	0	1	0.3	0.15	0.1026	44953	9732.42	27425	43401.8	2.9	10	263	34.7235	45.5978	6.0425
232	50738	1	0	0	1	1	1	1	0	0	1	1	1	1	0.4	1.19	0.0193	43968.4	8551.02	27041.6	43407.4	2.5	8	256	34.7234	45.6109	3.25695
233	50741	1	0	0	1	1	1	1	0	0	1	1	1	1	0.3	1.19	0.0193	41060.1	5001	26189.5	43622.5	2.5	18	238	34.7232	45.6502	10.3623
234	50742	1	1	1	1	1	1	1	1	1	1	1	1	1	0.3	2.63	0.1137	40108	3820.99	26010.2	43759.8	3.5	8	159	34.7231	45.6633	10.6236
235	50743	1	1	1	1	1	1	1	1	1	1	1	1	1	0.2	2.63	0.1137	39169.5	2630.59	25885.3	43929.5	2.7	7.6	281	34.7231	45.6764	5.27569
236	50745	1	1	1	1	1	1	1	1	1	1	1	1	1	0.4	2.63	0.1137	37335.8	300	25801.7	44364.4	4.1	16.8	230	34.7229	45.7026	32.7726
237	50748	1	1	1	1	1	0	1	1	1	1	1	1	1	0.3	1.58	0.9602	34638.3	3178.05	26093.1	45248.2	3.1	5	143	34.7227	45.742	0.725494
238	50749	1	1	1	1	1	1	1	1	1	1	1	1	1	0.4	1.58	0.9602	33712	4356.6	26299.2	45602.2	2.5	10	224	34.7226	45.7551	15.7156
239	50752	1	1	1	1	1	1	1	1	1	1	1	1	1	0.2	-3.24	2.7134	30770.9	7907.59	27227.4	46832.9	2.7	8.4	290	34.7224	45.7944	1.16534
240	50762	1	1	1	1	0	0	0	1	1	1	1	1	0	0.4	-3.07	2.5512	21518.8	19842.6	33077.6	52533	2.5	10	269	34.7214	45.9254	7.76924
241	50773	1	0	0	0	1	1	0	1	1	0	1	1	0	0.2	2.03	0.1877	11869.7	32162.2	42582.3	60954.1	2.6	10	302	34.7203	46.0696	8.41134
242	50783	1	0	0	0	1	0	1	0	0	0	0	0	0	0.4	0.26	0	2617.25	41306.9	52616.1	69888.1	2.6	5.8	230	34.719	46.2006	26.3293
243	50786	1	0	0	0	0	1	1	0	0	0	0	1	0	0	0.17	0	0	43771.3	55777.9	72740.2	3	11	326	34.7186	46.2399	30.9801
244	50788	1	0	0	0	1	1	0	0	0	0	0	1	0	0.3	0.14	0	1697.06	45404.2	57914.2	74677.6	2.8	10	313	34.7184	46.2661	10.3281
245	51020	1	0	0	1	0	1	1	0	0	1	0	0	0	0.2	0.13	0.0955	50546	15849.3	28969.8	42682.6	4.1	8.8	185	34.713	45.5322	0.141382
246	51023	1	0	0	1	1	1	1	0	0	1	0	0	1	0.3	0.15	0.1026	47605.1	12298.4	27240.6	42292.8	2.6	10	264	34.7128	45.5715	3.61176
247	51027	1	0	0	1	1	1	1	0	0	1	1	1	1	0.2	1.19	0.0193	43700.1	7566.37	25549.4	42247.4	2.5	8.6	335	34.7125	45.6239	4.13235
248	51036	1	1	1	1	1	1	1	1	1	1	1	1	1	0.5	0.86	1.1735	35386.2	3001.67	24907.2	44098.5	2.6	10	278	34.7119	45.7419	0.915253
249	51038	1	1	1	1	1	0	1	1	1	1	1	1	1	0.3	-3.24	2.7134	33422.9	5400.93	25393.9	44854	2.5	18	223	34.7117	45.7681	28.1408
250	51040	1	1	1	1	1	0	1	1	1	1	1	1	1	0.1	-3.24	2.7134	31468.2	7800.64	26093.1	45723.1	3.3	11.2	188	34.7115	45.7943	2.74836
251	51044	1	1	1	1	1	0	1	1	1	1	1	1	1	0.3	-6.64	3.8521	27704.3	12600.4	28060.8	47776.6	2.7	10	224	34.7112	45.8467	2.04929
252	51045	1	1	1	1	1	1	0	1	1	1	1	1	0	0.3	-6.64	3.8521	26812.7	13800.4	28657.5	48350.8	3.4	9.4	121	34.7111	45.8598	2.98598
253	51063	1	0	0	0	1	0	0	0	0	0	1	1	0	0.3	1.11	0	10744.8	33651.4	43823.9	61832.8	2.9	18	259	34.7092	46.0956	12.8244
254	51070	1	0	0	0	1	1	1	0	0	0	0	1	0	1	0.22	0	4301.16	39610.4	50982.8	68202.2	4	12	105	34.7083	46.1873	7.7671
255	51071	1	0	0	0	1	1	1	0	0	0	0	1	0	0.2	0.22	0	3394.11	40427.8	52035.9	69147.5	2.5	10	251	34.7082	46.2004	8.92694
256	51076	1	0	0	0	1	0	0	0	0	0	0	1	0	0.4	0.14	0	848.528	44525.3	57387.5	73985	2.5	8.3	282	34.7076	46.2659	33.0289
257	51324	1	1	1	1	1	0	1	1	1	1	1	1	1	0.2	0.86	1.1735	36071.7	3041.38	23722.8	42951.6	2.9	12.2	238	34.7011	45.7418	0.273898
258	51325	1	1	1	1	1	1	1	1	1	1	1	1	1	0.4	0.86	1.1735	35096	4229.66	23949.3	43324.4	2.5	10	224	34.701	45.7549	13.721
259	51331	1	1	1	1	1	0	1	1	1	1	1	1	1	0.4	-6.64	3.8521	29398.1	11411	26435.8	46156.7	2.8	10	285	34.7005	45.8335	2.98662
260	51333	1	1	1	1	1	0	0	1	1	1	1	1	0	0.5	-6.64	3.8521	27605.3	13809.1	27634.2	47307.1	3	8	226	34.7003	45.8597	1.69577
261	51349	1	0	0	0	1	1	0	1	1	0	1	1	0	0.1	1.96	0.1428	13368.6	30973.9	41166.6	59266.3	2.7	14.4	259	34.6986	46.0693	5.58053
262	51357	1	0	0	0	1	1	0	0	0	0	0	0	0	0.4	0.39	0	5981.64	37913.9	49353.9	66516.9	2.7	8	183	34.6977	46.1741	10.768
263	51359	1	0	0	0	1	1	1	0	0	0	0	1	0	0.1	0.22	0	4242.64	39545.5	51477.1	68420	2.5	10	250	34.6974	46.2003	7.90044
264	51360	1	0	0	0	1	1	1	0	0	0	0	1	0	0.3	0.22	0	3360.06	40377.3	52547.6	69383.1	2.7	11	180	34.6973	46.2134	30.4452
265	51364	1	0	0	0	1	0	1	0	0	0	0	1	0	0.3	0.14	0	100	43613.9	56881.4	73305.5	3.6	8.7	165	34.6967	46.2658	21.1599
266	51605	1	0	0	1	0	1	1	0	0	1	1	1	1	0.4	1.09	0.0832	43321.2	4883.65	22651.5	40042.5	3.1	8	199	34.6908	45.65	3.42757
267	51608	1	1	1	1	1	1	1	1	1	1	1	1	1	0.3	2.28	0.2386	40617.7	1360.15	22218.2	40596.1	2.6	7	235	34.6905	45.6893	2.22566
268	51611	1	1	1	1	1	1	1	1	1	1	1	1	1	0.4	0.86	1.1735	37746.1	2088.06	22363.6	41456	2.9	8	140	34.6903	45.7286	5.91517
269	51612	1	1	1	1	1	1	1	1	1	1	1	1	1	0.2	0.86	1.1735	36769.1	3255.76	22540	41807.7	2.5	8	222	34.6902	45.7417	5.63427
270	51615	1	1	1	1	1	0	1	1	1	1	1	1	1	0.5	-3.24	2.7134	33863.4	6789.7	23432.7	43046.5	3.1	11.2	131	34.69	45.781	26.8833
271	51616	1	1	1	1	1	1	1	1	1	1	1	1	1	0.5	-3.24	2.7134	32921.9	7976.21	23843.9	43517.8	2.7	6	136	34.6899	45.7941	11.538
272	51618	1	1	1	1	1	0	1	1	1	1	1	0	1	0.6	-6.64	3.8521	31092.3	10340.7	24820.4	44542.6	2.8	8.6	132	34.6897	45.8203	1.64975
273	51639	1	0	0	0	1	0	0	0	0	0	1	1	0	0.5	0.95	0	12257.7	32227	42517.4	60216.4	2.7	6	185	34.6876	46.0953	10.6918
274	51643	1	0	0	0	1	0	1	0	0	0	0	0	0	0.4	0.39	0	8591.27	35403.1	46672.2	63890.7	3.1	8	173	34.6871	46.1477	5.705
275	51644	1	0	0	0	1	0	1	0	0	0	0	0	0	0.5	0.39	0	7669.42	36217.4	47729.8	64832.2	3.1	8.8	231	34.687	46.1608	8.25988
276	51645	1	0	0	0	1	1	0	0	0	0	0	0	0	0.5	0.39	0	6788.23	37038.5	48794	65782.2	2.5	7.6	229	34.6868	46.1739	8.11124
277	51646	1	0	0	0	1	1	1	0	0	0	0	1	0	0.4	0.22	0	5939.7	37849.3	49864.3	66740.2	2.7	8	227	34.6867	46.187	14.1567
278	51647	1	0	0	0	1	1	1	0	0	0	0	1	0	0.1	0.22	0	5044.8	38680.4	50940.5	67706	2.6	11.7	226	34.6866	46.2001	14.15
279	51648	1	0	0	0	1	1	1	0	0	0	0	1	0	0.2	0.22	0	4172.53	39493	52022	68679.1	2.5	10.9	225	34.6864	46.2132	29.6242
280	51649	1	0	0	0	1	1	1	0	0	0	0	1	0	0.4	0.22	0	3324.15	40314	53108.7	69659.3	2.5	8	224	34.6863	46.2263	26.2436
281	51650	1	0	0	0	1	1	1	0	0	0	0	1	0	0.6	0.14	0	2475.88	41141	54200.1	70646.3	2.5	8	167	34.6862	46.2394	15.1216
282	51651	1	0	0	0	1	1	1	0	0	0	0	1	0	0.2	0.14	0	1555.63	41922	55296	71639.8	2.8	11.9	234	34.6861	46.2525	17.8036
283	51881	1	0	0	0	0	1	1	0	0	1	0	0	0	0.4	-0.25	0.1519	55561.2	18944.7	28252.6	39874.3	2.5	10	291	34.6807	45.4927	1.05038
284	51894	1	1	1	1	1	1	1	1	1	1	1	1	1	0.2	2.28	0.2386	43200.5	3492.85	21257.7	39004.1	2.6	10	322	34.6799	45.663	4.89058
285	51902	1	1	1	1	1	0	1	1	1	1	1	1	1	0.4	-3.24	2.7134	35547.3	5846.37	21924.6	41484.9	2.7	9.3	228	34.6792	45.7678	23.3312
286	51904	1	1	1	1	1	1	1	1	1	1	1	1	1	0.3	-3.24	2.7134	33689.3	8200	22730.8	42423.1	2.9	12	212	34.6791	45.794	29.0252
287	51923	1	0	0	0	1	0	1	1	1	0	1	1	0	0.9	1.96	0.1428	16743.1	27698.6	37830.8	55872.9	2.8	10	304	34.6772	46.0428	22.7372
288	51931	1	0	0	0	1	1	0	0	0	0	0	0	0	0.3	0.39	0	9360.56	34521	46110.8	63148.2	2.7	8	231	34.6763	46.1476	4.17814
289	51936	1	0	0	0	1	1	0	0	0	0	0	1	0	0.3	0.22	0	5020.96	38617.4	51519	67989	2.5	10	225	34.6756	46.2131	16.3503
290	51937	1	0	0	0	1	1	1	0	0	0	0	1	0	0.3	0.22	0	4172.53	39446.8	52616.1	68979	2.5	9.4	223	34.6755	46.2262	27.8136
291	51938	1	0	0	0	1	1	1	0	0	0	0	1	0	0.4	0.22	0	3252.69	40230.5	53717.5	69975.6	2.5	10	286	34.6754	46.2393	26.0714
292	51940	1	0	0	0	1	1	0	0	0	0	0	1	0	0.5	0.14	0	1555.63	41796.9	55932.5	71987.4	3	8.3	219	34.6751	46.2655	18.5397
293	51941	1	0	0	0	1	1	1	0	0	0	0	1	0	0.2	0.11	0	707.107	42585.4	57045.7	73002.1	2.8	9	172	34.675	46.2786	29.9896
294	51942	1	0	0	0	1	0	0	0	0	0	0	1	0	0.1	0.11	0	141.421	43367.3	58162.3	74022.3	2.8	17.6	216	34.6748	46.2916	8.11343
295	52171	1	0	0	1	1	1	0	0	0	1	0	0	0	0.4	0.11	0.1226	54290.5	16500.3	25773.8	38164.4	3.3	7.5	208	34.6697	45.5188	7.28343
296	52173	1	0	0	1	1	0	1	0	0	1	0	0	0	0.3	0.11	0.1226	52341.4	14100.4	24307.4	37759.8	3.3	9.1	206	34.6696	45.545	0.944983
297	52180	1	0	0	1	0	0	1	0	0	1	1	1	1	0.5	1.09	0.0832	45794.8	5700.88	20604.1	37536.6	2.7	6.4	244	34.6692	45.6367	1.73791
298	52182	1	1	1	1	1	1	1	1	1	1	1	1	1	0.3	2.28	0.2386	44006.9	3301.51	20073.1	37816.9	3.6	11	152	34.669	45.6629	2.81091
299	52187	1	1	1	1	1	1	1	1	1	1	1	1	1	0.4	0.39	1.2519	39142.9	2529.82	19983.2	39157.6	4.5	8	135	34.6687	45.7284	1.87938
300	52188	1	1	1	1	1	0	1	1	1	1	1	1	1	0.1	0.39	1.2519	38180.8	3640.05	20180.4	39529.7	2.8	11.5	142	34.6686	45.7415	7.90423
301	52192	1	1	1	1	1	0	1	1	1	1	1	1	1	0.8	-3.81	2.7675	34481.4	8190.85	21627.1	41334.2	2.6	10	207	34.6683	45.7939	12.5088
302	52193	1	1	1	1	1	1	1	1	1	1	1	1	1	0.3	-3.81	2.7675	33583.9	9330.06	22137.1	41859.3	2.7	14.1	208	34.6682	45.807	12.3629
303	52198	1	1	1	1	0	1	0	1	1	1	0	0	0	0.4	-7.2	3.8664	29093.1	14003.6	25393.9	44875.4	4.1	15.9	224	34.6677	45.8724	1.84883
304	52211	1	0	0	0	1	1	1	1	1	0	1	1	0	0.3	1.96	0.1428	17491.7	26987.6	37174.9	55048.5	3.9	7.1	171	34.6664	46.0427	24.2492
305	52217	1	0	0	0	1	1	0	0	0	0	1	1	0	0.4	0.95	0	11975.4	32014.1	43427.8	60518.6	3	7.9	165	34.6657	46.1213	8.09601
306	52218	1	0	0	0	1	0	0	0	0	0	1	1	0	0.4	0.95	0	11053.5	32824.7	44497.8	61464.9	2.6	11	296	34.6656	46.1343	5.79175
307	52219	1	0	0	0	1	0	0	0	0	0	0	0	0	0.3	0.39	0	10182.3	33650.1	45574.2	62420	2.8	12.1	229	34.6654	46.1474	11.2532
308	52220	1	0	0	0	1	1	0	0	0	0	0	0	0	0.4	0.39	0	9333.81	34457.1	46656.7	63383.4	3.4	10	187	34.6653	46.1605	11.5927
309	52221	1	0	0	0	1	1	1	0	0	0	0	0	0	0.6	0.33	0	8429.12	35286.4	47744.8	64354.8	3.9	8	87	34.6652	46.1736	9.80019
310	52223	1	0	0	0	1	1	1	0	0	0	0	1	0	0.3	0.18	0	6717.89	36920.7	49936.5	66320	2.6	8	224	34.6649	46.1998	4.74031
311	52224	1	0	0	0	1	1	1	0	0	0	0	1	0	0.3	0.18	0	5860.03	37752.5	51039.3	67313.1	2.7	10	223	34.6648	46.2129	7.01373
312	52225	1	0	0	0	1	1	0	0	0	0	0	1	0	0.3	0.18	0	4949.75	38539.5	52146.4	68313	2.7	10	221	34.6647	46.226	4.97452
313	52226	1	0	0	0	1	1	1	0	0	0	0	1	0	0.1	0.18	0	4101.22	39320.5	53257.6	69319.1	2.6	10	294	34.6645	46.2391	10.4351
314	52227	1	0	0	0	1	1	1	0	0	0	0	1	0	0.6	0.11	0	3252.69	40103.1	54372.5	70331.4	2.9	7.5	173	34.6644	46.2522	16.3219
315	52228	1	0	0	0	1	0	1	0	0	0	0	1	0	0.3	0.11	0	2360.08	40893.2	55491	71349.4	3	8	154	34.6643	46.2653	12.6435
316	52229	1	0	0	0	1	1	0	0	0	0	0	1	0	0.1	0.11	0	1486.61	41674	56612.8	72373.1	2.8	8	281	34.6641	46.2784	21.9195
317	52230	1	0	0	0	1	1	1	0	0	0	0	1	0	0.2	0.11	0	640.312	42472.6	57737.8	73402	2.8	11.7	214	34.664	46.2915	23.6432
318	52459	1	0	0	1	1	0	0	0	0	1	0	0	0	0.5	0.11	0.1226	54986.7	16530.3	24863.8	36989.2	3.8	8.4	193	34.6589	45.5188	1.33637
319	52465	1	0	0	1	1	1	1	0	0	1	0	0	1	0.4	0.17	0.1646	49308.9	9353.61	20795.4	36202.2	2.6	9	255	34.6586	45.5973	8.137
320	52466	1	0	0	1	1	1	1	0	0	1	0	0	1	0.5	0.17	0.1646	48398.8	8161.5	20287.2	36208.8	2.5	10	249	34.6585	45.6104	0.842238
321	52467	1	0	0	1	0	1	1	0	0	1	1	1	1	0.4	0.97	0.1394	47487.7	6972.09	19838.6	36255.2	2.5	8	282	34.6584	45.6235	2.19075
322	52468	1	0	0	1	0	0	1	0	0	1	1	1	1	0.4	0.97	0.1394	46589.7	5787.05	19453.8	36341.2	3.5	8	160	34.6584	45.6366	2.11896
323	52472	1	0	1	1	1	1	1	1	1	1	1	1	1	0.2	2.01	0.3122	42767.9	1170.47	18621.8	37073.4	2.6	8	279	34.6581	45.689	11.3905
324	52473	1	0	1	1	1	1	1	1	1	1	1	1	1	0.2	2.01	0.3122	41791	100	18602.4	37350.8	2.9	10.9	321	34.658	45.7021	4.44774
325	52476	1	1	1	1	1	1	1	1	1	1	1	1	1	0.4	0.39	1.2519	38918.5	3257.3	19004.5	38396.4	2.7	10	226	34.6578	45.7414	7.9313
326	52480	1	1	1	1	1	1	1	1	1	1	1	1	1	0.2	-3.81	2.7675	35277.8	7800.64	20534.1	40251.7	3.2	13.7	188	34.6574	45.7938	23.1203
327	52481	1	1	1	1	1	0	1	1	1	1	1	1	1	0.3	-3.81	2.7675	34374	8765.84	21070.6	40790.7	2.8	10	233	34.6574	45.8068	15.2931
328	52494	1	1	1	1	1	1	0	1	1	1	1	1	0	0.3	-3.52	2.5219	22926.8	21300.2	31541.2	49938	3.6	18.3	229	34.6561	45.9771	2.97496
329	52495	1	0	0	1	1	0	0	1	1	1	0	0	0	0.4	0.3	1.0491	21989.3	22339.7	32515.4	50772	2.6	7.3	175	34.656	45.9902	11.7575
330	52503	1	0	0	0	1	0	0	0	0	0	1	1	0	0.2	0.75	0	14586.6	29538.1	40744.7	57893.9	3	8	167	34.6551	46.0949	17.2438
331	52504	1	0	0	0	1	0	0	0	0	0	1	1	0	0.5	0.75	0	13665.3	30320	41814.5	58833.5	3	6	90	34.655	46.108	14.2679
332	52506	1	0	0	0	1	1	0	0	0	0	1	1	0	0.4	0.75	0	11879.4	31956.4	43974.2	60740.3	2.5	11	310	34.6547	46.1342	15.0248
333	52508	1	0	0	0	1	0	1	0	0	0	0	0	0	0.2	0.33	0	10123.7	33589.4	46157.7	62680.9	2.8	8	250	34.6545	46.1604	31.9088
334	52509	1	0	0	0	1	1	0	0	0	0	0	0	0	0	0.33	0	9263.37	34407.3	47257.3	63663	2.6	10.6	231	34.6544	46.1735	23.145
335	52510	1	0	0	0	1	1	1	0	0	0	0	0	0	0.2	0.33	0	8414.87	35224.1	48361.7	64652.5	2.5	11	225	34.6542	46.1866	9.47319
336	52511	1	0	0	0	1	1	1	0	0	0	0	1	0	0.3	0.18	0	7543.21	36058.4	49470.5	65648.9	3.1	8	85	34.6541	46.1997	8.02444
337	52512	1	0	0	0	1	1	0	0	0	0	0	1	0	0.3	0.18	0	6646.8	36848.1	50583.5	66652.1	4.1	12	175	34.654	46.2128	8.85099
338	52513	1	0	0	0	1	1	1	0	0	0	0	1	0	0	0.18	0	5798.28	37628.8	51700.4	67661.7	2.5	10	224	34.6539	46.2259	4.75619
339	52514	1	0	0	0	1	1	1	0	0	0	0	1	0	0.3	0.18	0	4949.75	38409.6	52820.9	68677.4	2.6	11.6	286	34.6537	46.2389	5.05403
340	52515	1	0	0	0	1	1	1	0	0	0	0	1	0	0.3	0.11	0	4045.99	39200.1	53944.9	69698.9	2.5	8.8	243	34.6536	46.252	16.0283
341	52516	1	0	0	0	1	1	1	0	0	0	0	1	0	0.2	0.11	0	3182.77	39981	55072	70726.1	2.7	8	170	34.6535	46.2651	33.4301
342	52517	1	0	0	0	1	0	1	0	0	0	0	1	0	0.2	0.11	0	2334.52	40777.4	56202.2	71758.6	2.9	10.2	236	34.6533	46.2782	8.76711
343	52743	1	0	0	0	1	0	0	0	0	1	0	0	0	0.3	-0.1	0.1382	59600.4	21413.3	27503.6	37131.7	2.5	17.4	297	34.6483	45.4663	3.03595
344	52748	1	0	0	1	1	0	0	0	0	1	0	0	0	0	0.19	0.1295	54740.9	15457.4	23170	35580.3	2.5	10	282	34.648	45.5318	2.65993
345	52749	1	0	0	1	1	1	1	0	0	1	0	0	0	0.3	0.19	0.1295	53790.1	14270.6	22395.8	35384.2	2.5	10	273	34.648	45.5449	3.87177
346	52750	1	0	0	1	1	0	1	0	0	1	0	0	1	0.2	0.19	0.1295	52849.3	13086.3	21660.3	35227.8	2.5	12	194	34.6479	45.558	2.91016
347	52760	1	0	1	1	1	1	1	1	1	1	1	1	1	0.1	2.01	0.3122	43466	1581.14	17423.3	35902.6	2.8	10	322	34.6473	45.6889	4.55456
348	52761	1	0	1	1	1	0	1	1	1	1	1	1	1	0.3	2.01	0.3122	42500	447.214	17402.6	36188.9	3	8	196	34.6472	45.702	34.4548
349	52763	1	1	1	1	1	1	1	1	1	1	1	1	1	0.4	0.39	1.2519	40605.5	1746.42	17608.2	36872.2	2.9	10	276	34.647	45.7282	16.5876
350	52764	1	1	1	1	1	0	1	1	1	1	1	1	1	0.3	0.39	1.2519	39678.8	2879.24	17831.7	37267.1	2.7	10	276	34.6469	45.7413	0.785473
351	52767	1	1	1	1	1	1	1	1	1	1	1	1	1	0.3	-3.81	2.7675	36971.9	6122.09	18947.6	38651.8	3.1	9.2	189	34.6467	45.7806	3.9512
352	52768	1	1	1	1	1	0	1	1	1	1	1	1	1	0.4	-3.81	2.7675	36067.3	7102.11	19453.8	39176	2.6	10	273	34.6466	45.7937	6.8524
353	52769	1	1	1	1	1	1	1	1	1	1	1	1	1	0.5	-3.81	2.7675	35174.6	8060.4	20019.2	39729.6	2.9	8	201	34.6465	45.8067	7.33676
354	52787	1	0	0	0	1	0	0	1	1	0	1	1	0	0.1	1.77	0.0881	19026.3	25471.9	35947.3	53442.5	2.8	10	258	34.6447	46.0424	6.99573
355	52788	1	0	0	0	1	0	1	1	1	0	1	1	0	0.3	1.77	0.0881	18104.4	26303	37000.1	54353.1	3.1	8.6	170	34.6446	46.0555	8.84895
356	52791	1	0	0	0	1	1	1	0	0	0	1	1	0	0.3	0.75	0	15352.5	28626.2	40208.1	57149.1	2.7	7.3	177	34.6443	46.0948	12.6015
357	52793	1	0	0	0	1	1	0	0	0	0	1	1	0	0.4	0.75	0	13576.5	30263	42381.7	59061.5	2.9	10.5	177	34.644	46.121	16.2486
358	52794	1	0	0	0	1	0	0	0	0	0	1	1	0	0.3	0.75	0	12727.9	31065.3	43477.5	60030.8	3.2	8.1	164	34.6439	46.1341	12.9237
359	52796	1	0	0	0	1	1	0	0	0	0	0	0	0	0.2	0.33	0	10960.4	32712.4	45684.7	61993.7	2.6	10	227	34.6437	46.1602	11.7232
360	52797	1	0	0	0	1	0	1	0	0	0	0	0	0	0.4	0.33	0	10111.9	33527.6	46795.4	62986.5	2.7	7.1	173	34.6436	46.1733	17.1963
361	52798	1	0	0	0	1	0	0	0	0	0	0	0	0	0.4	0.33	0	9231.47	34364.7	47910.4	63986.4	2.5	10	223	34.6434	46.1864	15.2827
362	52799	1	0	0	0	1	1	0	0	0	0	0	1	0	0.4	0.18	0	8343.86	35154.8	49029.5	64993.1	2.9	10	291	34.6433	46.1995	6.26462
363	52800	1	0	0	0	1	1	1	0	0	0	0	1	0	0.3	0.18	0	7495.33	35935.6	50152.3	66006.2	2.9	10	169	34.6432	46.2126	6.35837
364	52801	1	0	0	0	1	1	1	0	0	0	0	1	0	0.2	0.18	0	6646.8	36716.5	51278.6	67025.5	2.5	10	219	34.643	46.2257	6.36943
365	52802	1	0	0	0	1	1	1	0	0	0	0	1	0	0.5	0.18	0	5738.47	37507.5	52408.1	68050.7	2.5	7.2	217	34.6429	46.2388	3.79599
366	52803	1	0	0	0	1	1	1	0	0	0	0	1	0	0.3	0.11	0	4879.55	38288.4	53540.7	69081.5	2.5	8	167	34.6428	46.2519	7.61689
367	52804	1	0	0	0	1	1	1	0	0	0	0	1	0	0.3	0.11	0	4031.13	39082.5	54676.2	70117.8	2.7	10	238	34.6426	46.265	14.0373
368	52805	1	0	0	0	1	1	1	0	0	0	0	1	0	0.4	0.11	0	3080.58	39896.9	55814.4	71159.1	2.6	10	160	34.6425	46.2781	23.2889
369	52806	1	0	0	0	1	1	1	0	0	0	0	1	0	0.2	0.11	0	2109.5	40730.3	56955.2	72205.4	3	10.7	155	34.6424	46.2911	7.10595
370	53034	1	0	0	0	1	0	1	0	0	1	0	0	0	0.3	-0.1	0.1382	57380.2	18023.6	23994.4	34926.8	2.6	13.5	294	34.6373	45.5055	1.17685
371	53036	1	0	0	1	1	1	0	0	0	1	0	0	0	0.3	0.19	0.1295	55474.8	15673.2	22283	34400.6	3.1	14.5	196	34.6372	45.5317	1.48008
372	53037	1	0	0	1	1	1	1	0	0	1	0	0	0	0.5	0.19	0.1295	54536.7	14504.1	21476.7	34197.7	2.9	13.3	272	34.6372	45.5448	1.93757
373	53040	1	0	0	1	1	1	1	0	0	1	0	0	1	0.3	0.17	0.1646	51781.5	11036.8	19305.2	33837.8	3.8	9	204	34.637	45.5841	3.78373
374	53041	1	0	0	1	1	1	0	0	0	1	0	0	1	0.7	0.17	0.1646	50874.4	9897.98	18679.7	33802.4	3.7	16.9	204	34.6369	45.5972	2.44938
375	53045	1	0	0	1	0	0	1	0	0	1	1	1	1	0.5	0.97	0.1394	47091.9	5375.87	16813.4	34085.2	4.1	8.9	196	34.6367	45.6495	5.12428
376	53051	1	1	1	1	1	1	1	1	1	1	1	1	1	0.4	0.39	1.2519	41369.7	1360.15	16423.5	35735.1	2.9	17	138	34.6362	45.7281	32.3478
377	53053	1	1	1	1	1	0	1	1	1	1	1	1	1	0.4	0.39	1.2519	39566.8	3482.81	16983.8	36584.7	2.5	10	206	34.636	45.7543	6.56847
378	53054	1	1	1	1	1	0	1	1	1	1	1	1	1	0.6	0.39	1.2519	38666.3	4440.72	17381.9	37060.5	2.6	8	214	34.636	45.7674	2.65283
379	53058	1	1	1	1	1	1	1	1	1	1	1	1	1	0.4	-2.77	2.3121	35070.4	8072.17	19638	39273.9	3.7	6.8	114	34.6356	45.8197	0.908153
380	53074	1	0	0	0	0	0	1	1	1	1	0	0	0	0.4	0.22	0.8834	20717.1	23786.1	34318.1	51749.6	3.3	8	93	34.634	46.0292	6.05803
381	53082	1	0	0	0	1	1	0	0	0	0	1	1	0	0.2	0.75	0	13514.8	30195.5	43008.5	59337.2	2.5	10	227	34.6331	46.1339	12.4111
382	53084	1	0	0	0	1	0	1	0	0	0	0	0	0	0.4	0.33	0	11808.9	31831.1	45238.6	61322.3	2.5	10	170	34.6329	46.1601	15.3381
383	53085	1	0	0	0	1	1	1	0	0	0	0	0	0	0.1	0.33	0	10922.5	32668.3	46360	62325.8	3.2	10	223	34.6327	46.1732	21.4229
384	53087	1	0	0	0	1	0	0	0	0	0	0	1	0	0.4	0.18	0	9192.39	34242.8	48614.1	64352.9	2.5	10	221	34.6325	46.1994	21.7284
385	53088	1	0	0	0	1	1	1	0	0	0	0	1	0	0.2	0.18	0	8343.86	35023.7	49746.3	65376	2.7	10	219	34.6324	46.2124	3.62799
386	53089	1	0	0	0	1	1	1	0	0	0	0	1	0	0.3	0.18	0	7433.03	35815.2	50881.5	66405	2.5	10	215	34.6322	46.2255	2.45103
387	53090	1	0	0	0	1	1	1	0	0	0	0	1	0	0.3	0.18	0	6576.47	36596.2	52019.7	67439.6	3.1	10	212	34.6321	46.2386	8.33492
388	53091	1	0	0	0	1	1	1	0	0	0	0	1	0	0.4	0.11	0	5728	37387.7	53160.6	68479.6	2.8	10	163	34.632	46.2517	4.74207
389	53092	1	0	0	0	1	1	0	0	0	0	0	1	0	0.2	0.11	0	4763.4	38200.5	54304.1	69524.8	2.7	10	154	34.6318	46.2648	18.3049
390	53093	1	0	0	0	1	0	1	0	0	0	0	1	0	0.4	0.11	0	3773.59	39033.3	55449.9	70574.9	2.6	8	155	34.6317	46.2779	16.5859
391	53094	1	0	0	0	1	0	1	0	0	0	0	1	0	0.3	0.11	0	2801.79	39881.1	56598	71629.7	2.6	8	152	34.6315	46.291	5.93708
392	53327	1	0	0	1	1	1	1	0	0	1	0	0	1	0.2	0.17	0.1646	53473.4	12554.3	19023.4	32720	2.7	10	265	34.6262	45.5709	1.14495
393	53329	1	0	0	1	1	1	1	0	0	1	0	0	1	0.4	0.17	0.1646	51674.8	10288.3	17649.1	32602.5	3	13.2	252	34.6261	45.5971	5.26049
394	53333	1	0	0	1	0	1	1	0	0	1	1	1	1	0.2	0.97	0.1394	47789.6	5756.74	15660.5	32895.6	2.7	4.4	154	34.6258	45.6495	2.09854
395	53335	1	0	1	1	1	0	1	1	1	1	1	1	1	0.4	2.01	0.3122	45862.5	3478.51	15146.3	33301.7	2.5	10	140	34.6257	45.6756	7.6687
396	53336	1	0	1	1	1	1	1	1	1	1	1	1	1	0.4	2.01	0.3122	44916	2340.94	15027	33567.2	2.5	9.1	219	34.6256	45.6887	2.59607
397	53338	1	0	1	1	0	1	1	1	1	1	1	1	1	0.5	2.09	0.2348	43061	100	15074.8	34218.7	3.2	9.1	195	34.6255	45.7149	18.8475
398	53341	1	0	1	1	1	1	1	1	1	1	1	1	1	0.5	0.96	0.9911	40360	2778.49	15843.3	35479	2.9	8.9	282	34.6252	45.7542	4.09283
399	53342	1	0	0	1	1	0	1	1	1	1	1	1	1	0.4	0.96	0.9911	39454.9	3744.33	16269.3	35969.4	4.1	24	198	34.6251	45.7673	0.939372
400	53343	1	1	1	1	1	1	1	1	1	1	1	1	1	0.3	-2.77	2.3121	38560.3	4716.99	16770.5	36492.7	3.9	8	123	34.6251	45.7804	0.627112
401	53346	1	1	1	1	1	0	1	1	1	1	1	1	1	0.4	-2.77	2.3121	35875.5	7218.03	18660.4	38246	2.9	8.9	196	34.6248	45.8196	1.15265
402	53347	1	1	1	1	0	1	1	1	1	1	0	1	1	0.3	-6.01	3.3133	35004.3	8140.02	19398.2	38887	3.1	9.4	117	34.6247	45.8327	2.48891
403	53363	1	0	0	0	1	0	1	1	1	1	1	1	0	0.4	1.77	0.0881	20576.2	23700.2	34842.1	51897.8	2.5	9.4	175	34.6231	46.0421	12.9545
404	53367	1	0	0	0	1	1	0	0	0	0	1	1	0	0.3	0.75	0	16970.6	26870.4	39223.1	55707.3	3.2	8.7	88	34.6226	46.0945	2.1031
405	53368	1	0	0	0	1	1	1	0	0	0	1	1	0	0.3	0.75	0	16107.5	27674	40333.2	56683.2	4.1	6	140	34.6225	46.1076	16.39
406	53371	1	0	0	0	1	1	1	0	0	0	0	0	0	0.4	0.33	0	13505.9	30134.7	43692.2	59659.9	2.5	10	171	34.6222	46.1468	21.2537
407	53372	1	0	0	0	1	1	0	0	0	0	0	0	0	0.2	0.33	0	12615.1	30971.3	44820.2	60667.1	2.5	10	223	34.622	46.1599	27.6785
408	53373	1	0	0	0	1	1	1	0	0	0	0	0	0	0.3	0.33	0	11738	31769.5	45951.8	61681.3	2.9	10	221	34.6219	46.173	15.0681
409	53374	1	0	0	0	1	1	1	0	0	0	0	0	0	0.1	0.26	0	10889.4	32550.4	47086.8	62702	2.6	10	219	34.6218	46.1861	27.605
410	53375	1	0	0	0	1	0	0	0	0	0	0	1	0	0.4	0.15	0	10040.9	33331.4	48225	63729	2.6	8	218	34.6217	46.1992	12.8977
411	53376	1	0	0	0	1	0	1	0	0	0	0	1	0	0.3	0.15	0	9128.53	34123.5	49366.1	64761.9	2.8	6	82	34.6215	46.2123	8.79679
412	53377	1	0	0	0	1	1	1	0	0	0	0	1	0	0.3	0.15	0	8273.45	34904.4	50509.9	65800.5	2.6	10	161	34.6214	46.2254	8.186
413	53378	1	0	0	0	1	1	1	0	0	0	0	1	0	0.3	0.15	0	7406.08	35693.1	51656.3	66844.4	2.5	10	158	34.6213	46.2385	4.75998
414	53379	1	0	0	0	1	0	0	0	0	0	0	1	0	0.3	0.09	0	6435.06	36504.2	52805	67893.6	2.9	10	80	34.6211	46.2515	8.21276
415	53380	1	0	0	0	1	0	1	0	0	0	0	1	0	0.3	0.09	0	5440.59	37336.3	53956	68947.7	2.9	8	79	34.621	46.2646	6.25434
416	53381	1	0	0	0	1	0	0	0	0	0	0	1	0	0.3	0.09	0	4465.42	38184	55109.1	70006.4	2.8	10	89	34.6209	46.2777	10.3346
417	53382	1	0	0	0	1	1	1	0	0	0	0	1	0	0.3	0.09	0	3498.57	39044.8	56264.1	71069.7	3.1	8.2	78	34.6207	46.2908	22.1217
418	53607	1	0	0	0	1	0	0	0	0	0	0	0	0	0.2	-0.1	0.1382	61700.1	22075.6	25379.7	33759.7	3.4	14.8	212	34.6158	45.4661	1.72441
419	53608	1	0	0	0	1	0	1	0	0	1	0	0	0	0.2	-0.1	0.1382	60740.8	20920.1	24381.3	33337.7	2.7	14.9	288	34.6158	45.4792	4.0455
420	53609	1	0	0	0	1	1	1	0	0	1	0	0	0	0.4	-0.1	0.1382	59789	19769.9	23401.9	32953.9	2.8	13.1	294	34.6157	45.4923	2.64684
421	53611	1	0	0	0	1	1	0	0	0	1	0	0	0	0.3	0.19	0.1295	57913.1	17487.4	21510.2	32306.7	3.2	12.3	210	34.6156	45.5185	6.61641
422	53620	1	0	0	1	1	1	1	0	0	1	1	1	1	0.4	0.83	0.1607	49465.2	7273.24	14930.8	31562.6	2.7	10	233	34.6151	45.6363	2.65671
423	53621	1	0	0	1	1	1	1	0	0	1	1	1	1	0.3	0.83	0.1607	48500	6135.14	14515.2	31706.8	2.7	10	231	34.615	45.6494	1.10087
424	53622	1	0	0	1	1	1	1	0	0	1	1	1	1	0.4	0.83	0.1607	47545.5	4998	14189.1	31895.5	4.5	11.2	164	34.6149	45.6625	2.31971
425	53624	1	0	1	1	0	0	1	1	1	1	1	1	1	0.3	2.09	0.2348	45671.1	2773.08	13829.3	32403.1	3	9.4	233	34.6148	45.6886	4.04605
426	53627	1	0	1	1	1	1	1	1	1	1	1	1	1	0.1	0.96	0.9911	42953.5	141.421	14061.7	33474.2	2.9	15.2	312	34.6146	45.7279	13.5857
427	53629	1	0	1	1	1	0	1	1	1	1	1	1	1	0.4	0.96	0.9911	41149.1	2061.55	14712.2	34379.6	3.4	11.3	193	34.6144	45.7541	1.3245
428	53630	1	0	1	1	1	1	1	1	1	1	1	1	1	0.5	0.96	0.9911	40253.4	3047.95	15170	34885.5	4.6	9.4	146	34.6143	45.7672	0.698626
429	53632	1	1	1	1	1	1	1	1	1	1	1	1	1	0.1	-2.77	2.3121	38458.4	4686.15	16313.5	35996.1	2.6	10	271	34.6142	45.7933	0.791914
430	53634	1	1	1	1	1	1	1	1	1	1	1	1	1	0.2	-2.77	2.3121	36698	6463.75	17710.2	37228.5	3.2	10.9	188	34.614	45.8195	0.802774
431	53635	1	1	1	1	0	0	1	1	1	1	0	1	1	0.3	-6.01	3.3133	35807.5	7462.57	18485.9	37886.7	2.5	10	188	34.6139	45.8326	1.42896
432	53641	1	1	1	1	0	1	1	1	1	1	0	0	0	0.2	-6.11	3.2507	30610.5	13705.8	23865.7	42338.2	3.5	21.9	182	34.6133	45.9111	15.6978
433	53647	1	0	0	1	0	1	0	1	1	1	0	0	0	0.2	0.22	0.8834	25013.8	19475.6	30012.8	47460.5	2.6	12.3	93	34.6127	45.9897	6.59381
434	53656	1	0	0	0	1	1	0	0	0	0	0	0	0	0.5	0.54	0	16907.1	26801.7	39899.5	55999.5	2.5	6	227	34.6117	46.1074	31.3736
435	53657	1	0	0	0	1	1	1	0	0	0	0	0	0	0.4	0.54	0	16051.5	27629.3	41026.5	56995.6	4.9	4.6	85	34.6116	46.1205	13.255
436	53658	1	0	0	0	1	1	0	0	0	0	0	0	0	0.3	0.54	0	15203	28438.4	42157.4	57999.5	2.8	8	170	34.6115	46.1336	36.9246
437	53661	1	0	0	0	1	1	1	0	0	0	0	0	0	0.3	0.26	0	12586.5	30858.5	45571.6	61053.6	3.1	8	220	34.6111	46.1729	3.79155
438	53662	1	0	0	0	1	1	0	0	0	0	0	0	0	0.2	0.26	0	11729	31639.5	46715.8	62084.6	2.5	10	165	34.611	46.186	9.15907
439	53663	1	0	0	0	1	1	1	0	0	0	0	0	0	0.2	0.15	0	10824.5	32429.9	47862.8	63121.6	2.7	8	214	34.6108	46.199	9.20889
440	53664	1	0	0	0	1	0	0	0	0	0	0	1	0	0.3	0.15	0	9970.46	33213.3	49012.3	64164.3	2.8	8	296	34.6107	46.2121	8.04986
441	53665	1	0	0	0	1	0	1	0	0	0	0	1	0	0.2	0.15	0	9080.2	33998.8	50164.2	65212.4	2.5	7.4	157	34.6106	46.2252	4.65106
442	53666	1	0	0	0	1	1	1	0	0	0	0	1	0	0.3	0.15	0	8099.38	34808	51318.3	66265.7	3.6	10	156	34.6105	46.2383	13.013
443	53667	1	0	0	0	1	1	1	0	0	0	0	1	0	0.3	0.09	0	7121.8	35639.3	52474.5	67323.8	2.6	10	153	34.6103	46.2514	8.1786
444	53668	1	0	0	0	1	0	0	0	0	0	0	1	0	0.3	0.09	0	6140.03	36487	53632.5	68386.7	3.3	10	147	34.6102	46.2645	2.81392
445	53669	1	0	0	0	1	0	1	0	0	0	0	1	0	0.4	0.09	0	5161.4	37348.4	54792.4	69454	2.7	8	221	34.61	46.2776	6.60818
446	53670	1	0	0	0	1	1	0	0	0	0	0	1	0	0.5	0.09	0	4188.08	38228	55954	70525.6	2.8	10.4	142	34.6099	46.2906	14.3219
447	53901	1	0	0	1	1	1	0	0	0	1	0	0	0	0.2	0.21	0.1436	56858.1	15621.8	18909.5	30644.4	2.9	12.7	278	34.6047	45.5446	3.63877
448	53907	1	0	0	1	1	1	1	0	0	1	1	1	1	0.2	0.83	0.1607	51142.3	8792.04	14365.6	30266.2	3.4	10.6	202	34.6043	45.6231	2.32566
449	53910	1	0	0	1	1	0	1	0	0	1	1	1	1	0.3	0.83	0.1607	48289.2	5456.19	13025	30714.8	2.6	11.2	220	34.6041	45.6624	3.2557
450	53916	1	0	1	1	1	1	1	1	1	1	1	1	1	0.4	0.96	0.9911	42843.6	412.311	13189.8	32800.6	3.8	8	194	34.6037	45.7409	31.3131
451	53918	1	0	1	1	1	1	1	1	1	1	1	1	1	0.3	0.96	0.9911	41053.4	2332.38	14087.2	33809.5	3.3	7.8	193	34.6035	45.7671	2.20854
452	53920	1	1	1	1	1	1	1	1	1	1	1	1	1	0.5	-2.77	2.3121	39267.4	3828.84	15311.8	34954.3	2.9	12	192	34.6033	45.7932	0.642615
453	53921	1	1	1	1	1	1	1	1	1	1	1	1	1	0.1	-2.77	2.3121	38391.9	4801.04	16024	35573.6	3.5	11.2	189	34.6033	45.8063	0.832003
454	53922	1	1	1	1	1	1	1	1	1	1	1	1	1	0.4	-2.77	2.3121	37503.3	5818.08	16792	36222.1	3	6	107	34.6032	45.8194	0.561329
455	53923	1	1	1	1	0	1	1	1	1	1	0	1	1	0.1	-6.01	3.3133	36632.5	6860.03	17608.2	36898.2	3.5	18	236	34.6031	45.8325	0.489595
456	53925	1	1	1	1	0	1	1	1	1	1	0	1	1	0.2	-6.01	3.3133	34931.1	8947.07	19350.7	38327.5	2.5	10	323	34.6029	45.8587	1.64259
457	53934	1	1	1	1	1	1	1	1	1	1	1	1	0	0.4	-2.02	1.5665	26707.5	17788.2	28398.1	45766.6	2.6	8	264	34.602	45.9764	27.174
458	53939	1	0	0	0	1	0	0	0	0	1	1	1	0	0.2	1.51	0.0232	22116.5	21856.3	33871.1	50420	2.7	10	171	34.6015	46.0419	5.04208
459	53941	1	0	0	0	1	0	1	0	0	1	1	1	0	0.2	1.51	0.0232	20364.7	23476.4	36107.2	52358.2	2.6	10	170	34.6012	46.068	23.0421
460	53942	1	0	0	0	1	0	0	0	0	0	1	1	0	0.3	1.51	0.0232	19491.8	24283.5	37232.9	53341.4	3.6	8	169	34.6011	46.0811	7.66644
461	53945	1	0	0	0	1	1	0	0	0	0	0	0	0	0.5	0.54	0	16900	26742.1	40635.6	56341.3	3.5	8.1	166	34.6008	46.1204	16.9677
462	53946	1	0	0	0	1	1	0	0	0	0	0	0	0	0.4	0.54	0	16003.1	27577.2	41777.1	57356.6	2.9	9	167	34.6007	46.1335	30.8345
463	53948	1	0	0	0	1	0	1	0	0	0	0	0	0	0.2	0.26	0	14283.6	29167.3	44069.6	59407.9	2.8	10	82	34.6004	46.1596	4.34597
464	53949	1	0	0	0	1	1	1	0	0	0	0	0	0	0.5	0.26	0	13418.3	29948.3	45220	60443.2	2.7	5	218	34.6003	46.1727	28.5569
465	53950	1	0	0	0	1	1	0	0	0	0	0	0	0	0.3	0.26	0	12520.8	30735.3	46372.9	61484.5	2.7	10	162	34.6002	46.1858	19.3985
466	53951	1	0	0	0	1	1	0	0	0	0	0	0	0	0.4	0.15	0	11667.5	31522.7	47528.2	62531.4	2.5	8	90	34.6	46.1989	14.0642
467	53952	1	0	0	0	1	0	1	0	0	0	0	0	0	0.3	0.15	0	10761.5	32304.8	48685.6	63583.8	2.6	8	158	34.5999	46.212	12.4035
468	53953	1	0	0	0	1	0	0	0	0	0	0	1	0	0.4	0.15	0	9765.24	33111.9	49845.1	64641.3	2.7	8.4	206	34.5998	46.2251	8.83198
469	53954	1	0	0	0	1	0	1	0	0	0	0	1	0	0.3	0.15	0	8792.04	33942.3	51006.4	65703.7	3.4	8.5	78	34.5996	46.2381	14.0445
470	53955	1	0	0	0	1	0	1	0	0	0	0	1	0	0.5	0.09	0	7823.04	34789.9	52169.4	66770.8	2.9	8	89	34.5995	46.2512	8.30014
471	53956	1	0	0	0	1	1	1	0	0	0	0	1	0	0.4	0.09	0	6841.05	35651.9	53325.4	67842.3	3.3	8	77	34.5994	46.2643	5.58499
472	53957	1	0	0	0	1	1	1	0	0	0	0	1	0	0.3	0.09	0	5852.35	36533	54483	68918.1	3.3	7.2	87	34.5992	46.2774	6.87333
473	53958	1	0	0	0	1	1	1	0	0	0	0	1	0	0.4	0.09	0	4891.83	37431.8	55486.7	69997.9	3	8	197	34.5991	46.2905	10.1391
474	54186	1	0	0	0	1	1	1	0	0	1	0	0	0	0.5	-0.17	0.1565	60372.3	19416.5	21053.5	30305.8	2.8	10	253	34.594	45.5053	1.26966
475	54190	1	0	0	1	1	1	0	0	0	1	0	0	0	0.6	0.21	0.1436	56717.3	14862.7	17215.4	29274.6	3.3	8.3	192	34.5938	45.5576	2.01301
476	54192	1	0	0	1	0	0	1	0	0	1	0	0	1	0.4	0.1	0.1942	54765.8	12586.5	15498.7	29044.1	4.2	10.8	200	34.5937	45.5838	1.20273
477	54193	1	0	0	1	0	1	1	0	0	1	0	0	1	0.3	0.1	0.1942	53788.6	11449	14712.2	29002.8	4.2	13	164	34.5936	45.5969	2.42025
478	54197	1	0	0	1	1	0	1	0	0	1	1	1	1	0.5	0.83	0.1607	49976.9	7071.07	12256	29331.9	2.5	8	0	34.5934	45.6492	7.41311
479	54203	1	0	1	1	1	0	1	1	1	1	1	1	1	0.3	0.96	0.9911	44538.2	1166.19	11715.4	31234	2.8	10	198	34.5929	45.7277	29.8683
480	54206	1	0	1	1	1	0	1	1	1	1	1	1	1	0.4	0.96	0.9911	41847.5	1341.64	13025	32742	3.1	7.1	193	34.5927	45.767	1.24016
481	54207	1	1	1	1	1	1	1	1	1	1	1	1	1	0.4	-2.77	2.3121	40963.5	2140.09	13645.9	33316.1	4.5	11.3	158	34.5926	45.7801	2.12735
482	54208	1	1	1	1	1	1	1	1	1	1	1	1	1	0.5	-2.77	2.3121	40086.2	3138.47	14340.5	33922.9	4	8	190	34.5925	45.7931	0.288674
483	54209	1	1	1	1	1	1	1	1	1	1	1	1	1	0.3	-2.77	2.3121	39199.2	4188.08	15098.7	34560.7	3.1	14.7	190	34.5924	45.8062	0.205541
484	54211	1	1	1	1	0	1	1	1	1	1	0	1	1	0.2	-6.01	3.3133	37476.7	6264.98	16765.7	35922.7	2.5	10	183	34.5923	45.8324	0.865847
485	54216	1	1	1	1	1	1	1	1	1	1	1	1	1	0.5	-3.9	2.324	33047.8	11447.7	21528.8	39759.8	3.1	8	95	34.5918	45.8978	21.9342
486	54222	1	1	1	1	1	0	0	1	1	1	1	1	0	0.5	-2.02	1.5665	27476.7	17041.4	27882.1	44981.1	2.8	7.6	230	34.5912	45.9763	16.813
487	54225	1	0	0	1	1	1	1	1	1	1	0	0	0	0.1	0.47	0.5923	24724.5	19398.2	31197	47783.1	2.7	10	259	34.5909	46.0156	13.5333
488	54227	1	0	0	1	1	1	1	0	0	1	1	1	0	0.4	1.51	0.0232	22921.2	20953.8	33439.6	49708.1	2.7	10	173	34.5906	46.0417	0.750313
489	54228	1	0	0	0	1	0	0	0	0	1	1	1	0	0.4	1.51	0.0232	22061.7	21779.3	34568.9	50685.9	2.9	9	301	34.5905	46.0548	12.7575
490	54230	1	0	0	0	1	0	1	0	0	1	1	1	0	0.5	1.51	0.0232	20300	23407.9	36840.9	52669	4	6	85	34.5903	46.081	11.5223
491	54232	1	0	0	0	1	0	0	0	0	0	0	0	0	0.2	0.54	0	18597	25046	39128.1	54685.5	2.5	10	165	34.5901	46.1072	6.66318
492	54238	1	0	0	0	1	1	1	0	0	0	0	0	0	0.3	0.26	0	13364.5	29830.4	46058.8	60902.1	2.9	10	211	34.5893	46.1856	16.4066
493	54239	1	0	0	0	1	0	0	0	0	0	0	0	0	0.3	0.15	0	12425.8	30611.1	47221.7	61958.9	2.5	8	237	34.5892	46.1987	9.95907
494	54242	1	0	0	0	1	1	0	0	0	0	0	1	0	0.3	0.15	0	9486.83	33092.9	50695.2	65159	2.8	8	147	34.5888	46.238	10.9121
495	54243	1	0	0	0	1	0	1	0	0	0	0	1	0	0.4	0.09	0	8514.69	33955.6	51856	66234.9	2.8	8	194	34.5887	46.2511	5.17263
496	54244	1	0	0	0	1	1	1	0	0	0	0	1	0	0.5	0.09	0	7521.3	34838.2	52841.4	67314.9	2.9	7.2	76	34.5885	46.2641	8.96247
497	54245	1	0	0	0	1	1	1	0	0	0	0	1	0	0.4	0.09	0	6585.59	35739.3	53811.2	68399	2.6	10	214	34.5884	46.2772	5.05251
498	54246	1	0	0	0	1	1	1	0	0	0	0	1	0	0.3	0.09	0	5728	36657.6	54781.9	69486.8	2.8	8	134	34.5883	46.2903	5.57818
499	54247	1	0	0	0	1	1	1	0	0	0	0	1	0	0.4	0.09	0	4810.41	37591.8	55752.5	70578.3	3.6	6	74	34.5881	46.3034	7.34469
500	54476	1	0	0	0	1	0	0	0	0	1	0	0	0	0.2	0.21	0.1436	59344.8	17519.1	18388.3	28527.2	2.6	10	334	34.5831	45.5314	4.47335
501	54477	1	0	0	1	1	0	0	0	0	1	0	0	0	0.4	0.21	0.1436	58391.5	16381.1	17402.6	28282.2	2.9	5	252	34.5831	45.5444	2.90126
502	54484	1	0	0	1	1	1	1	0	0	1	1	1	1	0.3	0.83	0.1607	51665.2	8713.21	11684.6	27983.6	2.9	10	335	34.5826	45.636	2.14355
503	54485	1	0	0	1	1	1	1	0	0	1	1	1	1	0.5	0.83	0.1607	50741.8	7710.38	11148.5	28146	2.6	11.3	225	34.5825	45.6491	1.78495
504	54486	1	0	0	1	1	0	1	0	0	1	1	1	1	0.3	0.83	0.1607	49830.2	6720.12	10720.5	28358.4	3.5	8.7	138	34.5825	45.6622	1.01729
505	54487	1	0	1	1	0	1	1	1	1	1	1	1	1	0.3	2.09	0.2348	48931.1	5762.81	10413.9	28619.6	3	8	130	34.5824	45.6753	2.55964
506	54488	1	0	1	1	0	1	1	1	1	1	1	1	1	0.4	2.09	0.2348	48033.7	4780.17	10239.6	28928.2	2.6	10	205	34.5823	45.6884	1.50752
507	54489	1	0	1	1	0	0	1	1	1	1	1	1	1	0.2	2.09	0.2348	47130.1	3827.53	10204.4	29282.8	2.5	10	201	34.5823	45.7015	2.82206
508	54494	1	0	1	1	1	0	1	1	1	1	1	1	1	0.5	1.89	0.5307	42659.7	500	11988.7	31684.1	3.5	8	193	34.5819	45.7669	1.60068
509	54496	1	1	1	1	1	1	1	1	1	1	1	1	1	0.4	-0.68	1.4875	40895.2	2549.51	13406.3	32902.9	3.3	8.8	105	34.5817	45.793	0.765652
510	54497	1	1	1	1	1	1	1	1	1	1	1	1	1	0.2	-0.68	1.4875	40026.2	3584.69	14214.4	33560.1	2.5	10	240	34.5816	45.8061	1.7124
511	54500	1	1	1	1	1	1	1	1	1	1	1	1	1	0.2	-3.38	2.2951	37476.7	6711.93	16901.2	35701.5	3	9.5	99	34.5813	45.8454	0.913946
512	54501	1	1	1	1	1	1	1	1	1	1	1	1	1	0.2	-3.38	2.2951	36608.3	7752.42	17867.6	36466.4	3.7	7.1	236	34.5813	45.8584	2.41258
513	54513	1	0	0	1	1	1	1	1	1	1	0	0	0	0.1	0.47	0.5923	25503.3	18476.5	30774.8	47061.9	2.5	10	238	34.58	46.0154	16.2963
514	54516	1	0	0	1	1	1	0	0	0	1	1	1	0	0.6	1.51	0.0232	22879	20894.3	34188.4	50006.6	2.8	10	301	34.5797	46.0547	5.36037
515	54518	1	0	0	0	1	0	0	0	0	1	1	1	0	0.4	1.51	0.0232	21142.6	22549.9	36484.1	52015.6	2.6	9	164	34.5795	46.0808	16.2063
516	54522	1	0	0	0	1	1	0	0	0	0	0	0	0	0.4	0.54	0	17677.7	25785.7	41111.2	56125.8	2.8	10	244	34.579	46.1332	1.4702
517	54524	1	0	0	0	1	1	0	0	0	0	0	0	0	0.4	0.26	0	15913.8	27347	43433.6	58220.4	2.7	10	154	34.5788	46.1593	17.5294
518	54525	1	0	0	0	1	0	0	0	0	0	0	0	0	0.3	0.26	0	15061.5	28137	44589.7	59276.5	2.7	8	152	34.5786	46.1724	2.47415
519	54526	1	0	0	0	1	0	0	0	0	0	0	0	0	0.5	0.26	0	14091.1	28917.8	45748	60337.9	3.1	8	153	34.5785	46.1855	6.07586
520	54529	1	0	0	0	1	0	1	0	0	0	0	0	0	0.6	0.11	0	11160.6	31395.9	49223	63551.7	3.2	6	81	34.5781	46.2247	6.65978
521	54532	1	0	0	0	1	1	1	0	0	0	0	0	0	0.3	0.07	0	8280.7	34047.3	52137.2	66804.9	3.1	8.4	80	34.5777	46.264	8.76085
522	54533	1	0	0	0	1	1	1	0	0	0	0	0	0	0.4	0.07	0	7420.24	34968.8	53104.6	67897.1	2.6	10	186	34.5776	46.2771	9.35165
523	54759	1	0	0	0	1	1	1	0	0	0	0	0	0	0.3	-0.17	0.1565	64671.6	23590.7	23123.4	29348.3	2.8	18.4	287	34.5726	45.4659	5.73923
524	54766	1	0	0	1	1	0	0	0	0	1	0	0	0	0.5	0.21	0.1436	58112.4	15678	15729.3	26899.1	3	11.3	199	34.5722	45.5575	7.44664
525	54769	1	0	0	1	0	1	0	0	0	1	0	0	1	0.2	0.1	0.1942	55228.3	12435.4	12941.8	26603	3.3	10.6	173	34.572	45.5967	1.45234
526	54775	1	0	0	1	1	0	1	1	1	1	1	1	1	0.4	2.03	0.1006	49727.7	6463.75	9241.75	27455.4	3.2	9	125	34.5716	45.6752	3.39937
527	54776	1	0	0	1	1	1	1	1	1	1	1	1	1	0.4	2.03	0.1006	48823.5	5491.81	9044.89	27777	4.2	9.1	164	34.5715	45.6883	3.99991
528	54777	1	0	0	1	1	1	1	1	1	1	1	1	1	0.6	2.03	0.1006	47928	4522.17	9005	28146	3.2	7.5	204	34.5714	45.7014	6.56321
529	54778	1	0	0	1	1	0	1	1	1	1	1	1	1	0.3	2.03	0.1006	47028.7	3546.83	9124.14	28560.8	4.1	6	197	34.5714	45.7144	1.97299
530	54779	1	0	1	1	1	1	1	1	1	1	1	1	1	0.3	1.89	0.5307	46133	2617.25	9396.28	29019.3	3.2	9.4	196	34.5713	45.7275	8.54341
531	54780	1	0	1	1	1	0	1	1	1	1	1	1	1	0.7	1.89	0.5307	45237.3	1886.8	9808.67	29519.5	2.9	12	272	34.5712	45.7406	11.3299
532	54782	1	0	1	1	1	1	1	1	1	1	1	1	1	0.5	1.89	0.5307	43475.3	100	10985.9	30636.6	4	8	191	34.571	45.7668	9.34226
533	54784	1	1	1	1	1	1	1	1	1	1	1	1	1	0.4	-0.68	1.4875	41723.1	1969.77	12517.6	31895.5	2.5	10	319	34.5709	45.7929	1.25803
534	54787	1	1	1	1	1	1	0	1	1	1	1	1	1	0.5	-0.68	1.4875	39173.7	5077.4	15220.1	34014.7	2.6	12	318	34.5706	45.8322	1.93758
535	54794	1	1	1	1	1	1	0	1	1	1	1	1	1	0.4	-3.9	2.324	32691.4	11792.4	22520.4	39788.7	2.6	10	170	34.57	45.9237	10.491
536	54795	1	1	1	1	1	0	0	1	1	1	1	1	1	0.3	-3.9	2.324	31780.5	12728.3	23623.1	40686.4	2.7	8	170	34.5699	45.9368	34.534
537	54802	1	0	0	1	1	1	1	1	1	1	0	0	0	0.2	0.47	0.5923	25455.8	18385.3	31541.2	47346.6	2.5	6	255	34.5691	46.0284	14.6419
538	54808	1	0	0	0	1	0	1	0	0	0	0	0	0	0.4	0.36	0	20223.3	23302.6	38488.4	53447	2.6	11	207	34.5684	46.1069	14.8204
539	54812	1	0	0	0	1	0	1	0	0	0	0	0	0	0.5	0.19	0	16752.3	26444.1	43123.1	57655	2.7	8	153	34.5679	46.1592	27.5763
540	54813	1	0	0	0	1	1	0	0	0	0	0	0	0	0.4	0.19	0	15763.2	27225	44287.2	58721.2	2.7	8	328	34.5678	46.1723	19.4636
541	55063	1	0	0	1	1	1	1	0	0	1	0	0	1	0.5	0.45	0.179	50517	7161.01	8077.75	26294.5	2.7	8	282	34.5608	45.6751	6.08419
542	55064	1	0	0	1	1	0	1	1	1	1	1	1	1	0.4	2.03	0.1006	49623.1	6185.47	7851.75	26630.1	3	10.9	199	34.5607	45.6882	1.01291
543	55068	1	0	1	1	1	0	1	1	1	1	1	1	1	0.4	1.89	0.5307	46052.3	2692.58	8720.67	28442.9	3.6	6.9	239	34.5604	45.7405	13.6123
544	55070	1	0	1	1	1	1	1	1	1	1	1	1	1	0.2	1.89	0.5307	44287.5	632.456	10026.5	29600.7	2.5	13.8	177	34.5602	45.7667	5.01045
545	55071	1	0	1	1	1	1	1	1	1	1	1	1	1	0.7	1.89	0.5307	43420	316.228	10820.8	30234.4	4.4	15.1	159	34.5601	45.7797	5.5228
546	55073	1	1	1	1	1	1	1	1	1	1	1	1	1	0.4	-0.68	1.4875	41719.3	2416.61	12587.7	31600.6	3.4	9.4	106	34.56	45.8059	0.269544
547	55075	1	1	1	1	1	1	1	1	1	1	1	1	1	0.4	-0.68	1.4875	39980.5	4477.72	14534.4	33084.7	2.5	10	267	34.5598	45.8321	0.586818
548	55078	1	1	1	1	1	1	1	1	1	1	1	1	1	0.2	-3.38	2.2951	37170.4	7310.95	17664.9	35499.3	2.8	10	235	34.5595	45.8713	26.1921
549	55082	1	1	1	1	1	0	1	1	1	1	1	1	1	0.3	-3.9	2.324	33470.1	11042.2	22062.9	38993.6	3.5	8	93	34.5591	45.9236	12.9107
550	55085	1	1	1	1	1	1	0	1	1	1	1	1	0	0.5	-2.02	1.5665	30717.6	13547.3	25456.8	41783.5	2.5	8	259	34.5588	45.9629	38.2985
551	55086	1	0	0	1	1	0	1	0	0	1	0	0	0	0.2	-0.57	0.8693	29795.6	14328.3	26600.2	42740.4	4	7.4	178	34.5587	45.9759	36.4362
552	55098	1	0	0	0	1	1	1	0	0	0	0	0	0	0.3	0.36	0	19307.3	23960.4	40503.5	54972.2	2.6	6	158	34.5574	46.1329	5.19589
553	55100	1	0	0	0	1	0	0	0	0	0	0	0	0	0.4	0.19	0	17440.2	25532.7	42832.2	57109.2	2.7	8	87	34.5571	46.159	9.24173
554	55105	1	0	0	0	1	1	1	0	0	0	0	0	0	0.3	0.11	0	12573.4	29755.3	47812.7	62535.3	2.5	11	137	34.5565	46.2244	21.181
555	55106	1	0	0	0	1	1	0	0	0	0	0	0	0	0.4	0.11	0	11672.6	30665	48782.2	63632.9	3.5	8	83	34.5564	46.2375	9.51196
556	55107	1	0	0	0	1	0	0	0	0	0	0	0	0	0.4	0.11	0	10793.5	31594	49754	64734.1	3.5	8	209	34.5562	46.2506	7.44373
557	55111	1	0	0	0	1	1	0	0	0	0	0	0	0	0.4	0.07	0	7310.95	35473.1	53651.6	69171.8	3.2	7.3	73	34.5557	46.3029	12.3517
558	55343	1	0	0	1	1	0	0	0	0	1	0	0	0	0.5	0.13	0.1642	58597.7	15709.9	13433.2	24361.4	4.4	9.4	162	34.5505	45.5704	2.37872
559	55344	1	0	0	1	1	1	0	0	0	1	0	0	0	0.3	-0.12	0.2277	57660.5	14699.7	12402	24252.8	4.1	15.6	175	34.5504	45.5835	4.90645
560	55348	1	0	0	1	1	1	1	0	0	1	0	0	1	0.4	0.45	0.179	54015.6	10780.1	8720.67	24410.7	4.1	14.1	129	34.5502	45.6358	2.34875
561	55351	1	0	0	1	1	1	1	0	0	1	0	0	1	0.5	0.45	0.179	51316.5	7860.03	6926.04	25137.2	2.9	10	188	34.5499	45.675	1.60223
562	55354	1	0	0	1	1	1	0	1	1	1	1	1	1	0.3	2.03	0.1006	48627.7	5220.15	6768.31	26340.1	2.9	9	183	34.5497	45.7143	14.7982
563	55357	1	0	1	1	1	0	1	1	1	1	1	1	1	0.4	1.89	0.5307	45983.7	2247.22	8340.86	27957.8	3.2	6.9	194	34.5495	45.7535	6.74875
564	55358	1	0	1	1	1	1	1	1	1	1	1	1	1	0.2	1.89	0.5307	45117	1208.3	9124.14	28577.6	2.8	8	173	34.5494	45.7666	1.79386
565	55360	1	1	1	1	1	1	1	1	1	1	1	1	1	0.4	-0.68	1.4875	43416.4	761.577	10901.8	29923.2	3	7.5	191	34.5492	45.7927	4.60685
566	55363	1	1	1	1	1	1	1	1	1	1	1	1	1	0.3	-0.68	1.4875	40731.3	3764.31	13918.7	32172.7	3.4	12.9	229	34.549	45.832	0.481378
567	55364	1	1	1	1	1	1	1	1	1	1	1	1	1	0.4	-3.38	2.2951	39793.6	4701.06	14981.7	32975.8	2.8	5	171	34.5489	45.845	1.11662
568	55370	1	1	1	1	1	1	1	1	1	1	1	1	1	0.4	-1.46	1.3088	34242.8	10294.2	21662.2	38219.6	2.5	8	164	34.5483	45.9235	8.82262
569	55377	1	0	0	1	0	1	1	0	0	1	1	1	0	0.4	0.74	0.2904	27963	15814.2	29752.3	45021.1	2.6	9	162	34.5476	46.015	8.67195
570	55381	1	0	0	0	0	0	0	0	0	1	1	1	0	0.1	1	0	24480.6	19091.9	34391.9	49130.2	2.7	10	156	34.5471	46.0673	2.66482
571	55387	1	0	0	0	1	1	1	0	0	0	0	0	0	0.3	0.36	0	19112.8	23841.1	41291.2	55502.3	2.5	7.3	203	34.5464	46.1458	13.8947
572	55628	1	0	0	0	1	1	1	0	0	1	0	0	0	0.6	0.13	0.1642	62180.5	19425.8	16225	23873.8	2.6	10	284	34.5398	45.5311	4.9614
573	55630	1	0	0	0	1	1	0	0	0	1	0	0	0	0.4	0.13	0.1642	60283.4	17364.3	13984.6	23345.2	3.4	12.4	209	34.5397	45.5572	4.18435
574	55634	1	0	0	1	1	1	0	0	0	1	0	0	0	0.6	-0.12	0.2277	56604	13427.2	9734.99	23013.9	2.5	10	285	34.5395	45.6096	0.860118
575	55636	1	0	0	1	1	0	1	0	0	1	0	0	1	0.2	0.45	0.179	54807.8	11485.6	7851.75	23221.5	2.7	9.1	238	34.5393	45.6357	1.86131
576	55639	1	0	0	1	1	1	1	0	0	1	0	0	1	0.6	0.45	0.179	52112.4	8591.27	5793.96	23984.2	4	6.9	104	34.5391	45.6749	5.90989
577	55641	1	0	0	1	1	1	1	1	1	1	1	1	1	0.3	2.03	0.1006	50323.1	6902.9	5408.33	24771.8	3.1	10.6	105	34.539	45.7011	11.4585
578	55642	1	0	0	1	1	1	1	1	1	1	1	1	1	0.5	2.03	0.1006	49445	5968.25	5604.46	25242	2.7	8	99	34.5389	45.7142	2.53441
579	55647	1	0	1	1	1	1	1	1	1	1	1	1	1	0.3	2.18	0.1546	45113.4	761.577	9220.09	28248.2	2.6	9	270	34.5385	45.7795	1.36932
580	55650	1	0	0	1	1	1	1	1	1	1	1	1	1	0.3	0.95	0.6976	42417	2080.87	12298.4	30479.5	2.7	7.6	270	34.5382	45.8188	2.5288
581	55651	1	0	0	1	1	1	1	1	1	1	1	1	1	0.3	0.95	0.6976	41479.8	3023.24	13382.5	31280	2.8	9	166	34.5382	45.8319	0.985316
582	55652	1	0	1	1	1	0	1	1	1	1	1	1	1	0.4	-0.83	1.2345	40542.8	3940.81	14484.8	32105.5	4	8.8	188	34.5381	45.8449	0.503519
583	55654	1	0	1	1	1	1	1	1	1	1	1	1	1	0.4	-0.83	1.2345	38680.4	5805.17	16729.9	33818.6	3.3	8	142	34.5379	45.8711	8.51089
584	55658	1	1	1	1	1	1	0	1	1	1	1	1	1	0.4	-1.46	1.3088	35018.4	9402.13	21321.6	37468.1	2.7	8	261	34.5375	45.9234	10.6002
585	55671	1	0	0	0	0	0	1	0	0	1	1	1	0	0.3	1	0	23577.3	19795.2	36429.7	50671.7	2.6	8	150	34.5361	46.0934	2.75819
586	55678	1	0	0	0	1	1	0	0	0	0	0	0	0	0.5	0.19	0	16883.4	25475.1	43488.5	58274	3.6	8	88	34.5352	46.1849	15.5929
587	55679	1	0	0	0	1	1	1	0	0	0	0	0	0	0.5	0.19	0	15955.3	26368.5	44460.5	59377.6	2.8	6	223	34.5351	46.198	22.9431
588	55685	1	0	0	0	1	0	0	0	0	0	0	0	0	0.3	0.06	0	10696.3	32151.2	50313.5	66069.8	2.5	8.5	204	34.5343	46.2764	3.81379
589	55917	1	0	0	0	1	1	0	0	0	1	0	0	0	0.5	0.13	0.1642	61969.8	19026.3	14712.2	22411.6	4.1	17.1	215	34.529	45.5441	3.39989
590	55918	1	0	0	0	1	0	1	0	0	1	0	0	0	0.2	0.13	0.1642	61037.1	18027.8	13566.5	22163.9	2.8	10	282	34.5289	45.5572	3.60755
591	55919	1	0	0	0	1	1	0	0	0	1	0	0	0	0.4	0.13	0.1642	60114	17042.3	12431	21979.1	2.8	10	207	34.5288	45.5702	3.68238
592	55920	1	0	0	1	1	0	0	0	0	1	0	0	0	0.3	-0.12	0.2277	59200.8	16080.1	11308.8	21858.6	2.6	13.3	261	34.5288	45.5833	1.71443
593	55923	1	0	0	1	1	1	1	0	0	1	0	0	0	0.3	-0.12	0.2277	56500.4	13160.5	8077.75	21891.6	4.5	13.2	88	34.5286	45.6225	3.95285
594	55926	1	0	0	1	1	1	1	0	0	1	0	0	1	0.4	0.17	0.1646	53807.3	10282.5	5341.35	22507.8	2.5	13.6	109	34.5284	45.6618	1.69257
595	55929	1	0	0	1	1	1	1	0	0	1	1	1	1	0.2	1.56	0.0176	51141.5	7605.92	4210.7	23661.8	2.9	8	199	34.5282	45.701	6.24022
596	55931	1	0	0	1	1	1	1	0	0	1	1	1	1	0.2	1.56	0.0176	49376.3	5522.68	4993	24694.1	2.5	8.3	170	34.528	45.7271	2.24376
597	55933	1	0	1	1	1	1	1	1	1	1	1	1	1	0.3	2.18	0.1546	47659	3443.83	6594.69	25908.3	2.6	8	271	34.5278	45.7533	8.88437
598	55934	1	0	1	1	1	1	1	1	1	1	1	1	1	0.3	2.18	0.1546	46810.5	2416.61	7545.2	26575.9	3.2	8.5	194	34.5278	45.7664	5.76286
599	55935	1	0	1	1	1	0	1	1	1	1	1	1	1	0.6	2.18	0.1546	45961.9	1360.15	8558.62	27280	3.8	8.8	194	34.5277	45.7794	5.62739
600	55936	1	0	0	1	1	1	1	1	1	1	1	1	1	0.3	0.95	0.6976	45040.5	424.264	9615.09	28017.9	2.7	8	165	34.5276	45.7925	3.02645
601	55937	1	0	0	1	1	1	1	1	1	1	1	1	1	0.4	0.95	0.6976	44103.5	424.264	10701.9	28786.8	2.8	10	166	34.5275	45.8056	4.10398
602	55941	1	0	1	1	1	1	1	1	1	1	1	1	1	0.4	-0.83	1.2345	40371.4	4110.96	15220.1	32122.6	3.2	9	228	34.5271	45.8579	1.10432
603	55944	1	1	1	1	1	1	1	1	1	1	1	1	1	0.4	-1.46	1.3088	37628.8	6920.26	18700.3	34842.8	3.2	6.4	197	34.5269	45.8971	12.7018
604	55948	1	0	0	1	1	0	1	0	0	1	0	0	1	0.5	-0.57	0.8693	33976.8	10026.5	23332.4	38693.9	2.6	10	157	34.5265	45.9494	9.88547
605	55964	1	0	0	0	1	0	0	0	0	0	0	0	0	0.1	0.14	0	19520.5	22910.7	40841.8	55595.1	2.5	10	140	34.5247	46.1586	20.4141
606	56203	1	0	0	0	0	1	0	0	0	1	0	0	0	0.3	-0.2	0.1579	64596.1	21690.6	16770.5	21957.2	3.4	12.7	212	34.5182	45.5179	7.7244
607	56215	1	0	0	1	1	1	1	0	0	1	0	0	1	0.3	0.17	0.1646	53714.2	10282.5	3661.97	21693.3	2.8	6	279	34.5175	45.6748	5.67808
608	56216	1	0	0	1	1	0	1	0	0	1	1	1	1	0.2	1.56	0.0176	52838	9243.92	3132.09	22098.9	2.6	10	275	34.5174	45.6878	2.66365
609	56217	1	0	0	1	1	1	1	0	0	1	1	1	1	0.3	1.56	0.0176	51950.9	8198.78	3014.96	22561	3.1	9.9	109	34.5173	45.7009	2.30059
610	56218	1	0	0	1	1	1	1	0	0	1	1	1	1	0.4	1.56	0.0176	51072.7	7158.91	3354.1	23076.4	2.6	10.3	164	34.5173	45.714	1.4403
611	56219	1	0	0	1	1	1	1	0	0	1	1	1	1	0.6	1.56	0.0176	50207.8	6126.99	4036.09	23641.5	2.9	10	309	34.5172	45.7271	2.83096
612	56222	1	0	1	1	1	1	1	1	1	1	1	1	1	0.4	2.18	0.1546	47659	3047.95	6931.81	25600.8	3.8	8	195	34.5169	45.7663	9.70444
613	56229	1	0	1	1	1	0	1	1	1	1	1	1	1	0.4	-0.83	1.2345	41152.4	3360.06	14916.4	31316.8	3.5	8	143	34.5163	45.8578	12.3593
614	56230	1	0	1	1	1	1	1	1	1	1	1	1	1	0.4	-0.83	1.2345	40230.5	4301.16	16072.3	32227	2.5	10	160	34.5162	45.8709	13.9584
615	56231	1	0	1	1	1	1	1	1	1	1	1	1	1	0.4	-0.83	1.2345	39320.5	5234.5	17225.6	33155.7	3.7	6	228	34.5161	45.8839	7.91066
616	56233	1	1	1	1	1	1	1	1	1	1	1	1	1	0.4	-1.46	1.3088	37476.7	6794.12	19548.9	35062.5	3.2	8.2	158	34.516	45.9101	6.18349
617	56234	1	1	1	1	1	1	1	1	1	1	1	1	1	0.5	-1.46	1.3088	36565.8	7569.02	20712.6	36038	2.7	10	304	34.5159	45.9231	7.97806
618	56235	1	1	1	1	1	1	0	1	1	1	1	1	1	0.3	-1.46	1.3088	35672.1	8340.86	21876.9	37026.7	2.5	10	159	34.5158	45.9362	16.3763
619	56238	1	0	0	1	1	1	1	0	0	1	0	0	1	0.5	-0.57	0.8693	33049.2	10744.8	25369.3	40062.2	3	9	178	34.5154	45.9754	28.5791
620	56246	1	0	0	1	1	0	0	0	0	1	0	0	0	0.3	0.53	0	26086	17195.9	34320.8	48535.6	2.5	7.9	146	34.5146	46.08	13.1255
621	56259	1	0	0	0	1	0	0	0	0	0	0	0	0	0.8	0.09	0	14085.8	28846.1	46983.5	62997.9	2.5	10	174	34.5129	46.2499	9.72421
622	56260	1	0	0	0	1	0	1	0	0	0	0	0	0	0.3	0.06	0	13223.1	29880.1	47989.3	64132.5	2.7	0	173	34.5128	46.263	17.285
623	56502	1	0	0	1	1	1	0	0	0	1	0	0	1	0.5	0.17	0.1646	55409.8	11920.2	3758.99	20192.1	4.7	14.1	122	34.5067	45.6616	2.6935
624	56504	1	0	0	1	1	1	0	0	0	1	1	1	1	0.5	1.56	0.0176	53646.4	9841.24	2012.46	20984.8	2.8	8	119	34.5066	45.6877	1.05735
625	56506	1	0	0	1	1	1	1	0	0	1	1	1	1	0.5	1.56	0.0176	51904.7	7752.42	2343.07	22011.8	3.4	8	198	34.5064	45.7139	0.631733
626	56507	1	0	0	1	1	1	1	0	0	1	1	1	1	0.4	1.56	0.0176	51053.1	6711.93	3220.25	22603.5	2.6	11.7	159	34.5064	45.727	3.68272
627	56508	1	0	1	1	1	1	1	1	1	1	1	1	1	0.5	2.18	0.1546	50204.6	5685.95	4248.53	23242.2	2.5	8	274	34.5063	45.74	10.1952
628	56509	1	0	1	1	1	1	1	1	1	1	1	1	1	0.3	2.18	0.1546	49351.4	4742.36	5348.83	23924	2.8	10	270	34.5062	45.7531	10.7086
629	56511	1	0	1	1	1	0	1	1	1	1	1	1	1	0.3	2.18	0.1546	47477.3	2860.07	7640.03	25403.1	3.9	10.7	112	34.506	45.7792	16.1019
630	56513	1	0	0	1	1	0	1	1	1	1	1	1	1	0.2	0.95	0.6976	45602.7	1000	9968.95	27014.8	3.3	9.3	104	34.5059	45.8054	1.57443
631	56514	1	0	0	1	1	0	1	1	1	1	1	1	1	0.7	0.95	0.6976	44672.3	100	11131.9	27861.4	2.5	10	306	34.5058	45.8185	0.686434
632	56515	1	0	0	1	1	1	1	1	1	1	1	1	1	0.5	0.95	0.6976	43754.9	761.577	12280.1	28730.8	3.2	8.2	109	34.5057	45.8315	7.42673
633	56516	1	0	1	1	1	1	1	1	1	1	1	1	1	0.2	-0.83	1.2345	42842.2	1697.06	13437.3	29623.3	2.5	10	158	34.5056	45.8446	12.6378
634	56520	1	0	0	1	1	1	0	0	0	1	0	1	1	0.2	0.16	0.5381	39167.6	5099.02	18094.2	33386.5	3	6.7	184	34.5052	45.8969	7.86521
635	56521	1	0	0	1	1	0	1	0	0	1	0	1	1	0.3	0.16	0.5381	38259.4	5872.82	19257.5	34367.7	3.4	5.5	184	34.5051	45.91	12.9501
636	56522	1	0	0	1	1	1	1	0	0	1	0	1	1	0.4	0.16	0.5381	37367.6	6652.82	20421.6	35362.4	2.6	8	153	34.505	45.923	16.7099
637	56523	1	0	0	1	1	1	1	0	0	1	0	0	1	0.4	0.16	0.5381	36493.6	7420.24	21586.3	36369.5	2.6	8	151	34.5049	45.9361	16.1129
638	56525	1	0	0	1	0	0	1	0	0	1	0	0	1	0.3	0.42	0.3348	34744.9	9050.97	23914	38416.9	2.7	8.3	314	34.5047	45.9622	8.64763
639	56550	1	0	0	0	1	0	0	0	0	0	0	0	0	0.3	0.06	0	12510	31441.7	49415.9	65547.7	2.7	7.2	112	34.5017	46.289	3.53026
640	56788	1	0	0	1	1	0	1	0	0	1	0	0	0	0.4	0.17	0.1646	57991.8	14495.9	5731.49	18479.2	2.9	9.5	205	34.496	45.6354	1.92637
641	56789	1	0	0	1	1	0	0	0	0	1	0	0	0	0.2	0.17	0.1646	57105.6	13559.5	4539.82	18724.3	2.8	10	326	34.496	45.6484	19.354
642	56790	1	0	0	1	1	1	1	0	0	1	0	0	1	0.4	0.17	0.1646	56230.4	12519.6	3354.1	19042.1	3.5	10	153	34.4959	45.6615	7.95028
643	56791	1	0	0	1	1	1	1	0	0	1	0	0	1	0.5	0.17	0.1646	55342	11473.9	2184.03	19428.8	3.1	8.8	121	34.4958	45.6746	2.07687
644	56792	1	0	0	1	1	1	0	0	0	1	1	1	1	0.5	1.56	0.0176	54465.6	10431.7	1081.67	19880.6	2.5	7.9	276	34.4958	45.6877	7.14286
645	56795	1	0	0	1	1	1	1	0	0	1	1	1	1	0.2	1.56	0.0176	51901.6	7360.03	2692.58	21582.4	2.8	8	151	34.4955	45.7269	0.884586
646	56796	1	0	1	1	1	1	1	1	1	1	1	1	1	0.3	2.18	0.1546	51038.1	6420.28	3860.05	22250.4	2.5	9.1	153	34.4955	45.7399	8.16945
647	56801	1	0	0	1	1	0	1	1	1	1	1	1	1	0.4	1.41	0.2129	46362.2	1769.18	9654.01	26164.5	4.1	8	160	34.495	45.8053	1.05622
648	56804	1	0	0	1	0	1	0	1	1	1	0	0	1	0.4	0.61	0.4804	43613.9	921.954	13146.9	28847.5	3.2	8.4	189	34.4948	45.8445	0.874452
649	56808	1	0	0	1	1	1	1	0	0	1	0	1	1	0.3	0.16	0.5381	39953.2	4177.32	17802.5	32700.2	2.9	10	151	34.4944	45.8968	1.14402
650	56809	1	0	0	1	1	1	1	0	0	1	0	1	1	0.4	0.16	0.5381	39063.3	4957.82	18966.3	33701.3	2.5	5	153	34.4943	45.9098	6.98079
651	56810	1	0	0	1	1	0	1	0	0	1	0	1	1	0.8	0.16	0.5381	38190.3	5731.49	20124.1	34715.1	2.6	9	189	34.4942	45.9229	16.0227
652	56815	1	0	0	1	0	0	0	0	0	1	0	0	1	0.5	0.42	0.3348	33842.3	9794.9	25738.7	39939.2	2.7	12	249	34.4937	45.9882	25.5266
653	56816	1	0	0	1	1	1	1	0	0	1	1	1	1	0.5	0.82	0.0799	32962.1	10606.6	26852.2	41009.5	2.8	12	145	34.4936	46.0013	13.4227
654	56837	1	0	0	0	0	0	1	0	0	0	0	0	0	0.5	0.04	0	14199.3	29843.9	47778.8	63878.8	2.6	9	113	34.491	46.2757	5.95742
655	57065	1	0	0	0	0	0	0	0	0	0	0	0	0	0.3	-0.2	0.1579	68720.4	25691.2	18906.6	19723.1	4	17.4	214	34.4859	45.4915	6.6763
656	57069	1	0	0	0	1	1	0	0	0	1	0	0	0	0.5	0.15	0.1462	65075.4	21808.3	14108.9	17777.5	2.5	10.9	305	34.4857	45.5438	2.82504
657	57079	1	0	0	1	1	1	0	0	0	1	0	0	1	0.3	0.12	0.1191	56162.1	12073.9	2158.7	18309.6	2.5	8	274	34.485	45.6745	6.73381
658	57084	1	0	0	1	1	1	1	0	0	1	1	1	1	0.3	1.62	0	51787.3	7170.08	3544.01	21280	2.5	1.1	272	34.4846	45.7398	4.68292
659	57085	1	0	0	1	1	1	1	0	0	1	1	1	1	0.4	1.62	0	50850.5	6236.99	4707.44	22022.7	2.7	10	196	34.4846	45.7529	3.50211
660	57086	1	0	0	1	1	0	1	0	0	1	1	1	1	0.6	1.62	0	49913.9	5315.07	5869.41	22804.4	4.5	11.6	154	34.4845	45.766	4.33709
661	57088	1	0	0	1	1	1	1	1	1	1	1	1	1	0.5	1.41	0.2129	48052.6	3465.54	8200	24467.5	2.7	11.4	150	34.4843	45.7921	5.23644
662	57089	1	0	0	1	1	0	1	1	1	1	1	1	1	0.4	1.41	0.2129	47139.9	2523.89	9362.16	25339.7	2.5	10	267	34.4842	45.8052	1.42975
663	57090	1	0	0	1	1	1	1	1	1	1	1	1	1	0.4	1.41	0.2129	46221.3	1581.14	10526.2	26237.8	3.2	8	192	34.4841	45.8182	0.799012
664	57092	1	0	0	1	0	1	0	1	1	1	0	0	1	0.1	0.61	0.4804	44390.7	200	12855	28101.6	2.6	8	265	34.484	45.8444	5.84024
665	57093	1	0	0	1	0	1	0	1	1	1	0	0	1	0.5	0.61	0.4804	43468.8	943.398	14018.6	29063	2.6	11.7	149	34.4839	45.8574	2.73526
666	57097	1	0	0	1	1	1	1	0	0	1	0	1	1	0.4	0.16	0.5381	39887.1	4036.09	18607.8	33065.1	3.3	9.3	110	34.4835	45.9097	1.90592
667	57364	1	0	0	1	1	0	0	0	0	1	0	0	0	0.2	0.12	0.1191	59619.6	15794.3	5943.9	16120.8	2.6	10	206	34.4744	45.6352	3.68127
668	57371	1	0	0	1	1	1	1	0	0	1	1	1	1	0.3	0.91	0.0081	53474.5	8860.02	2088.06	19601	2.7	10	273	34.4739	45.7267	2.08753
669	57373	1	0	0	1	1	1	1	0	0	1	1	1	1	0.3	1.62	0	51600.1	7000	4414.75	21110.2	5	6.4	128	34.4737	45.7528	3.44477
670	57376	1	0	0	1	1	1	1	0	0	1	1	1	1	0.4	1.62	0	48832.9	4201.19	7907.59	23644.4	4.5	8	124	34.4735	45.792	5.11609
671	57377	1	0	0	1	1	1	1	1	1	1	1	1	1	0.3	1.41	0.2129	47911.7	3264.97	9070.83	24545.9	3.1	9.4	123	34.4734	45.8051	12.1498
672	57378	1	0	0	1	1	0	1	1	1	1	1	1	1	0.4	1.41	0.2129	46998.8	2334.52	10235.7	25471.9	2.7	8	122	34.4733	45.8181	0.307754
673	57385	1	0	0	1	1	1	1	0	0	1	0	1	1	0.3	0.16	0.5381	40717.7	3114.48	18161.8	32460.7	3.2	8	113	34.4727	45.9096	1.78461
674	57387	1	0	0	1	1	1	1	0	0	1	0	1	1	0.4	0.16	0.5381	38964.7	4750.79	20390.2	34573.1	4.1	6	183	34.4725	45.9357	22.6963
675	57647	1	0	0	0	0	1	0	0	0	1	0	0	0	0.4	0.17	0.1045	64867.4	21346	12054	14866.1	2.5	8	281	34.4639	45.5698	3.12625
676	57652	1	0	0	1	1	1	0	0	0	1	0	0	0	0.2	0.09	0.1314	60429.3	16385.7	6236.18	14946.6	2.8	10	221	34.4636	45.6351	2.36297
677	57659	1	0	0	1	1	1	0	0	0	1	1	1	1	0	0.91	0.0081	54223.6	9621.33	1802.78	18647.3	2.8	5	252	34.4631	45.7266	2.72258
678	57662	1	0	0	1	1	1	1	0	0	1	1	1	1	0.6	1.62	0	51434.7	6824.95	5288.67	21073.7	3.5	7.1	133	34.4628	45.7658	6.34488
679	57663	1	0	0	1	1	1	1	0	0	1	1	1	1	0.3	1.62	0	50524.4	5889.82	6451.36	21949.5	2.8	8	138	34.4628	45.7788	2.6405
680	57665	1	0	0	1	1	1	1	1	1	1	1	1	1	0.3	1.41	0.2129	48691.8	4031.13	8755.57	23786.1	2.5	10	182	34.4626	45.805	1.75404
681	57666	1	0	0	1	1	1	1	1	1	1	1	1	1	0.3	1.41	0.2129	47770.8	3111.27	9916.15	24740.7	2.5	10	140	34.4625	45.818	8.36208
682	57667	1	0	0	1	1	1	1	1	1	1	1	1	1	0.5	1.41	0.2129	46848.9	2334.52	11030.9	25715.8	2.6	5	125	34.4624	45.8311	2.83621
683	57939	1	0	0	0	1	1	1	0	0	1	0	0	0	0.4	0.09	0.1314	62125.2	18024.7	7712.98	13548.4	2.6	10	189	34.4528	45.622	4.39341
684	57940	1	0	0	0	1	0	0	0	0	1	0	0	0	0.3	0.09	0.1314	61251.8	17003.8	6551.34	13776.8	2.5	13.7	183	34.4528	45.635	3.14068
685	57945	1	0	0	1	1	1	0	0	0	1	1	1	1	0.3	0.91	0.0081	56847.3	12228.7	728.011	16254.2	2.6	10	274	34.4524	45.7004	25.932
686	57950	1	0	0	1	1	0	1	0	0	1	1	1	1	0.4	1.62	0	52214.3	7580.24	4972.93	20254.9	2.9	7	293	34.452	45.7657	2.33284
687	57951	1	0	0	1	1	1	1	0	0	1	1	1	1	0.4	1.62	0	51293.8	6640.03	6132.7	21164.6	2.6	10	266	34.4519	45.7787	5.40141
688	57952	1	0	0	1	1	1	1	0	0	1	1	1	1	0.5	0.81	0	50383.5	5720.14	7245	22102	3.1	6	195	34.4518	45.7918	3.72022
689	57953	1	0	0	1	1	1	1	0	0	1	1	1	1	0.4	1.09	0.0288	49461.6	4808.33	8357.03	23063.8	2.7	8	168	34.4518	45.8049	9.53754
690	57954	1	0	0	1	1	1	1	0	0	1	1	1	1	0.4	1.09	0.0288	48539.7	4022.44	9470.48	24047	3.1	8	193	34.4517	45.8179	2.74899
691	57955	1	0	0	1	1	1	1	0	0	1	1	1	1	0.3	1.09	0.0288	47628.8	3252.69	10584.9	25049.2	3.1	6	192	34.4516	45.831	5.62829
692	57957	1	0	0	1	0	0	1	0	0	1	1	1	1	0.7	0.94	0.1095	45846.9	1697.06	12815.6	27101.7	4.8	7.5	151	34.4514	45.8571	2.49512
693	57958	1	0	0	1	0	1	0	0	0	1	1	1	1	0.3	0.94	0.1095	44977.6	921.954	13928.4	28148.5	2.5	8	135	34.4513	45.8702	0.762032
694	57961	1	0	0	1	1	1	1	0	0	1	1	1	1	0.3	0.76	0.1294	42358.6	1389.24	17217.7	31355.1	3.2	8	118	34.451	45.9094	1.44512
695	57965	1	0	0	1	1	1	1	0	0	1	1	1	1	0.3	0.73	0.0603	38890.9	4666.9	21360	35747.2	2.5	10	175	34.4506	45.9616	7.72612
696	57967	1	0	0	1	1	1	1	0	0	1	1	1	1	0.4	0.73	0.0603	37106.6	6262.59	23299.8	37980.3	2.8	5	134	34.4504	45.9877	36.0577
697	57988	1	0	0	0	1	0	0	0	0	0	0	0	0	0.3	0.06	0	18663.9	27020.4	44518	60110.3	3.2	7.5	157	34.4479	46.262	15.8934
698	58227	1	0	0	0	1	1	0	0	0	1	0	0	0	0.3	0.09	0.1314	62948.4	18665.7	8005	12362.8	2.5	8	184	34.442	45.6219	3.09659
699	58229	1	0	0	0	1	0	0	0	0	1	0	0	0	0.5	0.12	0.1191	61235.4	16726.3	5675.39	12969.2	2.6	10	180	34.4419	45.648	3.81451
700	58237	1	0	0	1	1	1	1	0	0	1	1	1	1	0.6	0.81	0	53903.7	9261.75	3453.98	18560.7	2.9	10	142	34.4413	45.7525	4.21619
701	58238	1	0	0	1	1	1	1	0	0	1	1	1	1	0.7	0.81	0	52985.4	8324.06	4569.46	19475.6	4.7	8.3	150	34.4412	45.7656	11.9357
702	58240	1	0	0	1	1	1	1	0	0	1	1	1	1	0.3	0.81	0	51151.7	6505.38	6800.74	21390.2	2.5	11	133	34.441	45.7917	16.6376
703	58241	1	0	0	1	1	1	1	0	0	1	1	1	1	0.3	1.09	0.0288	50230.9	5700.88	7912.02	22382.6	2.6	10	134	34.4409	45.8048	0.669812
704	58242	1	0	0	1	1	1	1	0	0	1	1	1	1	0.4	1.09	0.0288	49322	4940.65	9024.97	23394.4	3.7	8	192	34.4409	45.8178	7.24498
705	58250	1	0	0	1	1	1	1	0	0	1	1	1	1	0.6	0.76	0.1294	42319	1345.36	17753	31961.5	4.1	8	119	34.4401	45.9223	4.16573
706	58255	1	0	0	1	1	1	1	0	0	1	1	1	1	0.4	0.73	0.0603	37803.8	5360.04	22580.1	37570.5	4	6	89	34.4396	45.9876	11.1715
707	58506	1	0	0	0	0	0	0	0	0	0	0	0	0	0.5	-0.01	0.1018	71743.2	28268.2	18764.1	14086.9	2.5	11	270	34.4317	45.5043	1.90159
708	58515	1	0	0	0	1	1	1	0	0	1	0	0	0	0.4	0.2	0.0695	63783.5	19360	8296.99	11180.3	2.6	10	200	34.4312	45.6218	1.40111
709	58516	1	0	0	0	1	1	1	0	0	1	0	0	0	0.3	0.2	0.0695	62932.5	18413.3	7130.92	11456	2.8	10	327	34.4311	45.6349	1.48661
710	58524	1	0	0	1	0	0	1	0	0	1	0	0	1	0.4	0.41	0.0299	55593.6	10948.1	1897.37	16867.1	2.6	8	147	34.4305	45.7394	10.064
711	58527	1	0	0	1	1	0	1	0	0	1	1	1	1	0.5	0.81	0	52841.1	8202.44	5239.27	19720.5	3.4	8	196	34.4303	45.7785	7.03705
712	58528	1	0	0	1	1	1	1	0	0	1	1	1	1	0.4	0.81	0	51922.4	7387.83	6356.1	20723.4	4.3	10	138	34.4302	45.7916	20.6688
713	58529	1	0	0	1	1	1	1	0	0	1	1	1	1	0.4	1.09	0.0288	51015.5	6621.93	7467.26	21746.3	3.4	8	135	34.4301	45.8047	1.85361
714	58530	1	0	0	1	1	1	1	0	0	1	1	1	1	0.4	1.09	0.0288	50120.9	5841.23	8579.63	22786.4	2.6	10	134	34.43	45.8177	2.98562
715	58531	1	0	0	1	1	1	0	0	0	1	1	1	1	0.3	1.09	0.0288	49239.2	5080.35	9693.3	23841.6	2.5	8	133	34.4299	45.8308	1.75175
716	58537	1	0	0	1	1	1	1	0	0	1	1	1	1	0.5	0.76	0.1294	44014.8	282.843	16080.1	30399	2.9	8	130	34.4294	45.9091	12.1581
717	58540	1	0	0	1	1	1	1	0	0	1	1	1	1	0.3	0.76	0.1294	41416.5	2109.5	18973.7	33776	3.1	6	120	34.4291	45.9483	9.2824
718	58542	1	0	0	1	1	0	1	0	0	1	1	1	1	0.3	0.73	0.0603	39471.6	3676.96	20902.2	36051.4	3.9	8	94	34.4289	45.9744	18.3359
719	58802	1	0	0	0	1	1	1	0	0	1	0	0	0	0.4	0.2	0.0695	65480.5	21041.2	9771.9	9832.6	3.4	9.8	205	34.4204	45.6087	1.85563
720	58805	1	0	0	0	0	1	0	0	0	1	0	0	0	0.4	0.15	0.0731	62844.6	18225.8	6293.65	10742.4	3.6	10.8	183	34.4202	45.6479	2.11787
721	58807	1	0	0	1	0	0	0	0	0	1	0	0	0	0.3	0.15	0.0731	60970.2	16367	4016.22	11928.1	3.3	9.3	174	34.4201	45.674	3.30308
722	58810	1	0	0	1	0	0	1	0	0	1	0	0	0	0.4	0.41	0.0299	58203.2	13572.4	670.82	14286.4	2.8	7.8	271	34.4199	45.7132	19.8121
723	58812	1	0	0	1	0	1	1	0	0	1	0	0	1	0.6	0.41	0.0299	56369.6	11703.4	1456.02	16102.8	3.4	9.3	199	34.4197	45.7393	8.25918
724	58813	1	0	0	1	1	1	1	0	0	1	1	1	1	0.3	0.81	0	55452.8	10781.5	2563.2	17065.2	3.4	6	149	34.4196	45.7523	22.7224
725	58815	1	0	0	1	1	1	1	0	0	1	1	1	1	0.4	0.81	0	53614.4	9078.55	4792.7	19070.9	3.3	6.7	196	34.4195	45.7784	24.813
726	58816	1	0	0	1	1	0	1	0	0	1	1	1	1	0.4	0.81	0	52709.2	8309.63	5909.31	20106.2	3.1	8.8	141	34.4194	45.7915	14.7077
727	58817	1	0	0	1	1	1	1	0	0	1	1	1	1	0.5	1.09	0.0288	51816	7528.61	7021.4	21158.9	3.1	8	140	34.4193	45.8046	10.2827
728	58826	1	0	0	1	1	1	1	0	0	1	1	1	1	0.5	0.76	0.1294	43982	360.555	16321.8	31116.9	3.9	8	124	34.4185	45.9221	11.6295
729	58840	1	0	0	1	0	0	0	0	0	1	0	0	1	0.4	0.23	0	31112.7	12209	30066.8	46300.1	2.5	10	108	34.417	46.1049	3.19694
730	58847	1	0	0	0	0	1	1	0	0	1	0	0	0	0.5	0.08	0	25253.3	20318	37568.2	53242.3	2.6	10	237	34.4161	46.1963	0.314013
731	59087	1	0	0	0	1	0	0	0	0	0	0	0	0	0.4	0.17	0.0617	68909.4	24659.5	13559.1	9044.33	3.8	9.3	213	34.4098	45.5694	2.20915
732	59090	1	0	0	0	1	0	0	0	0	1	0	0	0	0.4	0.2	0.0695	66326.6	21786.7	10088.1	8637.13	3.3	8	205	34.4096	45.6086	7.25333
733	59092	1	0	0	0	1	1	0	0	0	1	0	0	0	0.3	0.2	0.0695	64531	19912.3	7810.89	9176.06	3.6	10.9	201	34.4095	45.6347	2.83865
734	59094	1	0	0	0	0	1	1	0	0	1	0	0	0	0.5	0.15	0.0731	62657.2	18054.4	5571.36	10262.6	2.8	8	274	34.4093	45.6608	1.58006
735	59102	1	0	0	1	1	1	1	0	0	1	1	1	1	0.6	0.81	0	55306.6	10771.3	3231.1	17427	3.4	10	145	34.4087	45.7653	21.0853
736	59103	1	0	0	1	1	1	1	0	0	1	1	1	1	0.5	0.81	0	54403.1	10000.5	4338.2	18476.5	2.5	9	149	34.4086	45.7783	24.0891
737	59104	1	0	0	1	1	1	1	0	0	1	1	1	1	0.4	0.81	0	53511.3	9219.54	5412.02	19543.3	3.8	6	145	34.4086	45.7914	0.520494
738	59105	1	0	0	1	1	0	0	0	0	1	1	1	1	0.5	1.09	0.0288	52631.7	8450.44	6484.6	20624.7	2.8	8	141	34.4085	45.8045	9.17693
739	59106	1	0	0	1	1	1	1	0	0	1	0	0	1	0.3	0.58	0.0199	51765	7669.42	7558.44	21718.7	2.6	6	141	34.4084	45.8175	5.92801
740	59108	1	0	0	1	1	1	1	0	0	1	0	0	1	0.5	0.58	0.0199	50010.5	6140.03	9704.64	23937	3.5	8	136	34.4082	45.8436	6.13542
741	59112	1	0	0	1	1	0	1	0	0	1	0	0	1	0.5	0.66	0.0237	46535.4	2831.96	13682.1	28462.3	2.6	5	253	34.4078	45.8958	1.11275
742	59376	1	0	0	0	1	0	0	0	0	0	0	0	0	0.3	0.17	0.0617	68874.5	24410	12744	7571	3.8	8	206	34.3989	45.5824	5.67022
743	59381	1	0	0	0	0	1	1	0	0	1	0	0	0	0.2	0.15	0.0731	64344.8	19742.6	7130.92	8609.3	2.8	10	260	34.3986	45.6477	0.693531
744	59387	1	0	0	1	0	0	1	0	0	1	0	0	0	0.4	0.22	0.04	58833.8	14167.6	447.214	13729.5	4.2	9.2	162	34.3981	45.726	21.5881
745	59390	1	0	0	1	1	1	1	0	0	1	0	0	1	0.5	0.36	0.0315	56097.2	11693.2	2729.47	16860	3.3	8	153	34.3979	45.7652	5.91553
746	59391	1	0	0	1	1	1	1	0	0	1	0	0	1	0.5	0.36	0.0315	55206.7	10912.4	3801.32	17942.7	3.2	9.4	149	34.3978	45.7782	6.87509
747	59392	1	0	0	1	1	1	0	0	0	1	0	0	1	0.4	0.36	0.0315	54328.1	10141.5	4875.45	19039.4	2.6	10	146	34.3977	45.7913	15.9316
748	59393	1	0	0	1	1	1	0	0	0	1	0	0	1	0.4	0.58	0.0199	53461.9	9360.56	5948.11	20148	2.5	0	146	34.3977	45.8043	27.6119
749	59397	1	0	0	1	1	0	1	0	0	1	0	0	1	0.8	0.66	0.0237	49986.6	6184.66	10080.2	24667.8	4	8	174	34.3973	45.8566	8.86281
750	59404	1	0	0	1	1	1	1	0	0	1	0	0	1	0.4	0.63	0.0192	43520.2	538.516	16844.3	32766.6	3	11.3	127	34.3966	45.9479	30.4308
751	59415	1	0	0	1	0	1	0	0	0	1	0	0	1	0.4	0.23	0	33620.4	10439.3	27862.7	43919.2	2.5	10	244	34.3954	46.0915	26.1066
752	59664	1	0	0	0	1	0	1	0	0	0	0	0	0	0.4	0.15	0.0313	69720.7	25160.7	13147.2	6403.12	3.3	10.7	211	34.3881	45.5823	3.16105
753	59668	1	0	0	0	1	0	0	0	0	1	0	0	0	0.3	0.23	0.0302	66032.8	21427.3	8692.53	6977.11	2.8	10	261	34.3878	45.6346	2.96478
754	59670	1	0	0	0	1	0	0	0	0	1	0	0	0	0.2	0.22	0.0368	64189.8	19568.6	6462.2	8354.64	3.2	11.6	206	34.3877	45.6607	9.27709
755	59672	1	0	0	0	1	1	1	0	0	1	0	0	0	0.8	0.22	0.0368	62357.1	17695.5	4237.92	10104.5	2.6	10	297	34.3876	45.6868	4.22814
756	59681	1	0	0	1	1	1	1	0	0	1	0	0	1	0.5	0.58	0.0199	54279.4	10282.5	5412.02	19732.7	2.6	11	186	34.3868	45.8042	20.9411
757	59682	1	0	0	1	1	1	0	0	0	1	0	0	1	0.3	0.58	0.0199	53403.5	9513.15	6463.75	20873.4	4	7.2	145	34.3867	45.8173	35.4188
758	59702	1	0	0	1	0	1	1	0	0	1	0	0	1	0.2	0.1	0.0291	35315.9	9113.73	26252.8	42248.1	2.7	26.3	181	34.3847	46.0783	34.0728
759	59949	1	0	0	0	1	0	1	0	0	0	0	0	0	0.4	0.15	0.0313	73128.5	28723.7	16936.6	7213.88	3.2	13.9	215	34.3775	45.5431	0.7786
760	59952	1	0	0	0	1	1	0	0	0	0	0	0	0	0.4	0.15	0.0313	70528.4	25909.5	13593	5249.76	4.4	8	163	34.3773	45.5823	1.06636
761	59957	1	0	0	0	1	0	1	0	0	1	0	0	0	0.4	0.22	0.0368	65881.8	21255.8	8023.09	6660.33	3.6	7.5	193	34.3769	45.6475	2.02907
762	59967	1	0	0	1	1	1	0	0	0	1	0	0	1	0.5	0.36	0.0315	56855.8	12747.5	2729.47	17079.2	3.1	11.2	168	34.3762	45.778	5.39617
763	59974	1	0	0	1	1	1	1	0	0	1	0	0	1	0.4	0.66	0.0237	50770.3	7140.03	9621.33	25200.2	2.9	10	139	34.3756	45.8694	15.1467
764	59989	1	0	0	1	0	1	1	0	0	1	0	0	1	0.4	0.07	0.0542	37011.5	7922.75	24654.6	40579.1	3.5	7.3	226	34.374	46.0651	23.8514
765	60235	1	0	0	0	0	0	0	0	0	0	0	0	0	0.3	0.15	0.0167	75694.3	31360	19609.4	8497.06	3.5	10.7	217	34.3667	45.5169	1.45538
766	60249	1	0	0	0	1	1	1	0	0	1	0	0	0	0.5	0.22	0.0368	62985.9	18384.8	4159.33	9900.5	2.7	10	177	34.3658	45.6996	1.81835
767	60541	1	0	0	1	1	1	0	0	0	1	0	0	0	0.4	0.15	0.0513	60249.6	16133.5	412.311	14140	3.7	7.8	166	34.3547	45.7517	4.90642
768	60545	1	0	0	1	0	1	1	0	0	1	0	0	0	0.5	0.03	0.0876	56767.1	12955.7	3360.06	18797.1	2.9	8	155	34.3544	45.8039	2.30978
769	60547	1	0	0	1	0	1	1	0	0	1	0	0	1	0.5	0.04	0.1007	55019.4	11314.6	5300.94	21124.9	2.8	10	319	34.3542	45.83	21.9147
770	60567	1	0	0	1	0	1	1	0	0	1	0	0	1	0.5	0.1	0.0291	36996.9	10728	26027.9	41306.9	2.8	10	118	34.3522	46.091	19.9348
771	60569	1	0	0	1	0	1	1	0	0	1	0	0	0	0.5	0.1	0.0291	35392.2	13049.5	28324	43076	3.3	5	74	34.3519	46.1171	5.91668
772	60818	1	0	0	0	1	0	1	0	0	0	0	0	0	0.3	0.17	0.0202	70958.6	26315.4	12745.6	1612.45	2.8	2.9	209	34.3447	45.6081	0.747951
773	60819	1	0	0	0	1	1	1	0	0	0	0	0	0	0.3	0.17	0.0202	70037.8	25378.9	11672.6	2420.74	2.6	7.6	206	34.3446	45.6212	3.95068
774	60824	1	0	0	0	1	1	1	0	0	1	0	0	0	0.2	0.24	0.0233	65465.3	20942.3	6306.35	8028.08	3.3	8.5	183	34.3443	45.6864	8.40178
775	60850	1	0	0	1	0	0	1	0	0	1	0	0	1	0.5	0.07	0.0542	42099.1	6010.82	19958.2	35584.4	2.5	8	232	34.3419	46.0256	25.7497
776	61107	1	0	0	0	1	0	0	0	0	0	0	0	0	0.4	0.17	0.0202	70817.9	26145.7	12209	1923.54	3	8	212	34.3338	45.6211	7.40041
777	61108	1	0	0	0	1	1	1	0	0	0	0	0	0	0.4	0.17	0.0202	69896.1	25230.1	11136	3080.58	2.8	12	273	34.3337	45.6342	3.89795
778	61113	1	0	0	0	1	1	1	0	0	1	0	0	0	0.3	0.24	0.0233	65380.9	21064	5769.75	8902.25	3.6	11.3	202	34.3334	45.6994	4.74295
779	61683	1	0	0	0	1	1	1	0	0	0	0	0	0	0.3	0.17	0.0202	72357.6	27731.6	13282.3	1334.17	4	11.9	207	34.3122	45.6209	10.4512
780	61688	1	0	0	0	1	0	1	0	0	0	0	0	0	0.5	0.24	0.0233	67900.1	23668.5	8060.4	7156.81	2.6	10	189	34.3118	45.6862	7.63244
781	61977	1	0	0	0	0	0	1	0	0	0	0	0	0	0.9	0.02	0.0468	67847	23809.7	7800.64	7787.81	2.6	10	189	34.3009	45.6991	14.2767
782	62545	1	0	0	0	0	0	0	0	0	0	0	0	0	0.4	0.12	0.0079	76527.8	31961.2	17067.2	1835.76	2.6	11	217	34.2798	45.5946	2.58482
783	62550	1	0	0	0	0	1	1	0	0	0	0	0	0	0.4	0.02	0.0468	72118.3	27963.5	12121.1	3534.12	2.7	8	201	34.2795	45.6598	16.2789
784	37818	0	1	1	0	0	0	0	0	0	0	0	0	0	0	-2.69	0.7451	24691.1	64770.8	89219.1	108941	0	0	0	35.2065	46.1418	18.821
785	37819	0	1	1	0	0	1	0	0	0	0	0	0	0	0	-2.69	0.7451	25640	65515	89762.2	109484	0	0	0	35.2064	46.155	22.4263
786	37820	0	1	1	0	0	1	0	0	0	0	0	0	0	0	-2.69	0.7451	26609.2	66272.5	90317.9	110037	0	0	0	35.2063	46.1682	22.0486
787	37821	0	1	1	0	0	0	0	0	0	0	0	0	0	0	-4.53	0.9882	27596.6	67043	90886.1	110601	0	0	0	35.2061	46.1814	9.81372
788	37822	0	1	1	0	0	0	0	0	0	0	0	0	0	0	-4.53	0.9882	28600.2	67826	91466.6	111174	0	0	0	35.206	46.1945	30.3254
789	37823	0	1	1	0	0	0	0	0	0	0	0	0	0	0	-4.53	0.9882	29618.4	68621.1	92058.9	111758	0	0	0	35.2059	46.2077	30.0506
790	37824	0	1	1	0	0	1	0	0	0	0	0	0	0	0	-4.53	0.9882	30649.8	69427.7	92663.1	112351	0	0	0	35.2057	46.2209	30.2656
791	38097	0	0	0	0	0	1	0	0	0	0	0	0	0	0	-0.02	0.1101	16549.6	57714.9	83813.9	103433	0	0	0	35.1968	46.0231	9.86869
792	38098	0	0	0	0	0	0	0	0	0	0	0	0	0	0	-0.02	0.1101	17196.8	58327.1	84238.1	103880	0	0	0	35.1966	46.0362	2.5835
793	38099	0	0	0	0	0	0	0	0	0	0	0	0	0	0	-0.02	0.1101	17901.1	58957.4	84677.1	104339	0	0	0	35.1965	46.0494	9.68307
794	38100	0	0	0	0	0	0	0	0	0	0	0	0	0	0	-0.02	0.1101	18656.1	59605.1	85130.8	104809	0	0	0	35.1964	46.0626	17.4864
795	38101	0	0	0	0	0	1	0	0	0	0	0	0	0	0	-1.19	0.3957	19455.8	60269.8	85598.9	105291	0	0	0	35.1963	46.0758	21.5867
796	38102	0	0	0	0	0	0	0	0	0	0	0	0	0	0	-1.19	0.3957	20295.1	60950.9	86081.2	105785	0	0	0	35.1962	46.089	21.0162
797	38103	0	0	0	0	0	0	0	0	0	0	0	0	0	0	-1.19	0.3957	21169.1	61647.8	86577.4	106290	0	0	0	35.1961	46.1021	18.4504
798	38104	0	0	0	0	0	0	0	0	0	0	0	0	0	0	-1.19	0.3957	22073.7	62360	87087.4	106805	0	0	0	35.1959	46.1153	18.8412
799	38105	0	1	1	0	0	0	0	0	0	0	0	0	0	0	-2.69	0.7451	23005.4	63087	87610.8	107332	0	0	0	35.1958	46.1285	15.3312
800	38106	0	1	1	0	0	0	0	0	0	0	0	0	0	0	-2.69	0.7451	23961	63828.3	88147.4	107870	0	0	0	35.1957	46.1417	24.7021
801	38107	0	1	1	0	0	1	0	0	0	0	0	0	0	0	-2.69	0.7451	24937.7	64583.4	88697.1	108418	0	0	0	35.1956	46.1548	9.39134
802	38108	0	1	1	0	0	0	0	0	0	0	0	0	0	0	-2.69	0.7451	25933.2	65351.7	89259.5	108977	0	0	0	35.1954	46.168	35.1677
803	38109	0	1	1	0	0	0	0	0	0	0	0	0	0	0	-4.53	0.9882	26945.3	66133	89834.3	109545	0	0	0	35.1953	46.1812	31.4027
804	38110	0	1	1	0	0	1	0	0	0	0	0	0	0	0	-4.53	0.9882	27972.3	66926.6	90421.5	110124	0	0	0	35.1952	46.1944	31.2263
805	38111	0	1	1	0	0	0	0	0	0	0	0	0	0	0	-4.53	0.9882	29012.6	67732.2	91020.7	110714	0	0	0	35.1951	46.2076	33.4145
806	38112	0	1	1	0	0	0	0	0	0	0	0	0	0	0	-4.53	0.9882	30064.8	68549.3	91631.7	111312	0	0	0	35.1949	46.2207	36.9211
807	38377	0	0	0	0	1	0	0	0	0	0	0	0	0	0	0.18	0	13046.5	52421.8	79818.6	99154.2	0	0	0	35.1868	45.9175	10.0917
808	38378	0	0	0	0	1	0	0	0	0	0	0	0	0	0	0.18	0	13000.4	52877.7	80120.2	99504.6	0	0	0	35.1867	45.9307	5.24131
809	38379	0	0	0	0	1	0	0	0	0	0	0	0	0	0	0.18	0	13064.8	53356.6	80438.6	99868.1	0	0	0	35.1866	45.9438	11.5181
810	38380	0	0	0	0	1	0	0	0	0	0	0	0	0	0	0.18	0	13238.2	53858.1	80773.6	100245	0	0	0	35.1865	45.957	3.16037
811	38381	0	0	0	0	0	1	0	0	0	0	0	0	0	0	0.32	0	13516.3	54381.3	81124.9	100634	0	0	0	35.1864	45.9702	1.79803
812	38382	0	0	0	0	0	0	0	0	0	0	0	0	0	0	0.32	0	13892.8	54925.9	81492.4	101036	0	0	0	35.1863	45.9834	2.8707
813	38383	0	0	0	0	0	0	0	0	0	0	0	0	0	0	0.32	0	14360	55491	81875.8	101451	0	0	0	35.1862	45.9966	4.12151
814	38384	0	0	0	0	0	0	0	0	0	0	0	0	0	0	0.32	0	14909.4	56076.1	82275	101879	0	0	0	35.186	46.0097	3.88006
815	38385	0	0	0	0	0	1	0	0	0	0	0	0	0	0	-0.02	0.1101	15532.2	56680.6	82689.6	102318	0	0	0	35.1859	46.0229	5.52168
816	38386	0	0	0	0	0	1	0	0	0	0	0	0	0	0	-0.02	0.1101	16220	57303.8	83119.5	102770	0	0	0	35.1858	46.0361	15.3264
817	38387	0	0	0	0	0	1	0	0	0	0	0	0	0	0	-0.02	0.1101	16965	57945.2	83564.4	103234	0	0	0	35.1857	46.0493	23.9902
818	38388	0	0	0	0	0	1	0	0	0	0	0	0	0	0	-0.02	0.1101	17759.8	58604.2	84024.1	103709	0	0	0	35.1856	46.0625	22.6319
819	38389	0	0	0	0	0	0	0	0	0	0	0	0	0	0	-1.19	0.3957	18598.1	59280.1	84498.3	104196	0	0	0	35.1855	46.0756	16.2564
820	38390	0	0	0	0	0	0	0	0	0	0	0	0	0	0	-1.19	0.3957	19474.3	59972.4	84986.9	104695	0	0	0	35.1854	46.0888	26.7554
821	38391	0	0	0	0	0	0	0	0	0	0	0	0	0	0	-1.19	0.3957	20383.6	60680.6	85489.5	105205	0	0	0	35.1852	46.102	20.5063
822	38392	0	0	0	0	0	0	0	0	0	0	0	0	0	0	-1.19	0.3957	21321.6	61404	86005.9	105726	0	0	0	35.1851	46.1152	17.3127
823	38393	0	1	1	0	0	0	0	0	0	0	0	0	0	0	-2.69	0.7451	22284.7	62142.2	86535.8	106258	0	0	0	35.185	46.1283	18.5136
824	38394	0	1	1	0	0	0	0	0	0	0	0	0	0	0	-2.69	0.7451	23269.9	62894.6	87079.1	106801	0	0	0	35.1849	46.1415	18.4626
825	38395	0	1	1	0	0	0	0	0	0	0	0	0	0	0	-2.69	0.7451	24274.5	63660.7	87635.4	107355	0	0	0	35.1848	46.1547	10.3412
826	38396	0	1	1	0	0	1	0	0	0	0	0	0	0	0	-2.69	0.7451	25296	64440.1	88204.6	107919	0	0	0	35.1846	46.1679	31.3135
827	38397	0	1	1	0	0	0	0	0	0	0	0	0	0	0	-4.53	0.9882	26332.7	65232.3	88786.3	108493	0	0	0	35.1845	46.181	30.4002
828	38398	0	1	1	0	0	0	0	0	0	0	0	0	0	0	-4.53	0.9882	27382.7	66036.7	89380.4	109078	0	0	0	35.1844	46.1942	24.9153
829	38399	0	1	1	0	0	0	0	0	0	0	0	0	0	0	-4.53	0.9882	28444.5	66853	89986.5	109672	0	0	0	35.1842	46.2074	38.8437
830	38400	0	1	1	0	0	0	0	0	0	0	0	0	0	0	-4.53	0.9882	29516.1	67680.8	90604.5	110277	0	0	0	35.1841	46.2206	23.826
831	38656	0	0	0	0	1	0	0	0	0	0	0	0	0	0	0.13	0	16758.6	48272.3	76695	95436.9	0	0	0	35.1768	45.7988	0.015512
832	38657	0	0	0	0	1	1	0	0	0	0	0	0	0	0	0.14	0	15928.9	48500.4	76840.4	95665.5	0	0	0	35.1767	45.8119	10.0565
833	38659	0	0	0	0	1	0	0	0	0	0	0	0	0	0	0.14	0	14426.7	49041.7	77186.3	96165.9	0	0	0	35.1765	45.8383	15.5716
834	38660	0	0	0	0	1	0	0	0	0	0	0	0	0	0	0.14	0	13771.3	49353.9	77386.6	96437.5	0	0	0	35.1764	45.8515	22.2234
835	38661	0	0	0	0	1	0	0	0	0	0	0	0	0	0	0.15	0	13192.8	49693.2	77605	96723.3	0	0	0	35.1763	45.8647	7.01209
836	38662	0	0	0	0	1	0	0	0	0	0	0	0	0	0	0.15	0	12701.6	50058.9	77841.2	97023.1	0	0	0	35.1763	45.8778	4.66634
837	38663	0	0	0	0	1	0	0	0	0	0	0	0	0	0	0.15	0	12308.1	50450.5	78095.1	97336.7	0	0	0	35.1762	45.891	6.85634
838	38664	0	0	0	0	1	1	0	0	0	0	0	0	0	0	0.15	0	12022.1	50867.4	78366.6	97664.1	0	0	0	35.1761	45.9042	11.8078
839	38665	0	0	0	0	1	0	0	0	0	0	0	0	0	0	0.18	0	11851.2	51309	78655.5	98005.1	0	0	0	35.176	45.9174	14.1748
840	38666	0	0	0	0	1	0	0	0	0	0	0	0	0	0	0.18	0	11800.4	51774.6	78961.6	98359.5	0	0	0	35.1759	45.9305	6.47368
841	38667	0	0	0	0	1	1	0	0	0	0	0	0	0	0	0.18	0	11871.4	52263.7	79284.6	98727.3	0	0	0	35.1758	45.9437	2.6643
842	38668	0	0	0	0	1	0	0	0	0	0	0	0	0	0	0.18	0	12061.9	52775.5	79624.4	99108.2	0	0	0	35.1757	45.9569	5.41155
843	38669	0	0	0	0	0	0	0	0	0	0	0	0	0	0	0.32	0	12366.5	53309.4	79980.8	99502.2	0	0	0	35.1756	45.9701	6.07295
844	38670	0	0	0	0	0	0	0	0	0	0	0	0	0	0	0.32	0	12776.9	53864.7	80353.5	99909	0	0	0	35.1754	45.9833	3.58588
845	38671	0	0	0	0	0	0	0	0	0	0	0	0	0	0	0.32	0	13283.4	54440.9	80742.4	100328	0	0	0	35.1753	45.9964	2.17642
846	38672	0	0	0	0	0	0	0	0	0	0	0	0	0	0	0.32	0	13875.5	55037.2	81147.1	100761	0	0	0	35.1752	46.0096	3.30743
847	38673	0	0	0	0	0	0	0	0	0	0	0	0	0	0	-0.02	0.1101	14542.7	55652.9	81567.5	101205	0	0	0	35.1751	46.0228	6.37874
848	38674	0	0	0	0	0	1	0	0	0	0	0	0	0	0	-0.02	0.1101	15275.1	56287.6	82003.2	101662	0	0	0	35.175	46.036	18.8099
849	38675	0	0	0	0	0	1	0	0	0	0	0	0	0	0	-0.02	0.1101	16063.9	56940.4	82454.2	102130	0	0	0	35.1749	46.0491	20.5191
850	38676	0	0	0	0	0	1	0	0	0	0	0	0	0	0	-0.02	0.1101	16901.2	57610.9	82920	102611	0	0	0	35.1748	46.0623	32.7519
851	38677	0	0	0	0	0	1	0	0	0	0	0	0	0	0	-1.19	0.3957	17780	58298.3	83400.5	103103	0	0	0	35.1747	46.0755	15.964
852	38678	0	0	0	0	0	0	0	0	0	0	0	0	0	0	-1.19	0.3957	18694.7	59002.1	83895.5	103607	0	0	0	35.1745	46.0887	12.0584
853	38679	0	0	0	0	0	0	0	0	0	0	0	0	0	0	-1.19	0.3957	19640	59721.8	84404.6	104122	0	0	0	35.1744	46.1018	17.201
854	38680	0	0	0	0	0	0	0	0	0	0	0	0	0	0	-1.19	0.3957	20611.9	60456.7	84927.6	104649	0	0	0	35.1743	46.115	11.678
855	38681	0	1	1	0	0	0	0	0	0	0	0	0	0	0	-2.69	0.7451	21606.7	61206.3	85464.2	105187	0	0	0	35.1742	46.1282	27.2333
856	38682	0	1	1	0	0	0	0	0	0	0	0	0	0	0	-2.69	0.7451	22621.4	61970.1	86014.2	105735	0	0	0	35.1741	46.1414	2.21576
857	38683	0	1	1	0	0	0	0	0	0	0	0	0	0	0	-2.69	0.7451	23653.5	62747.5	86577.4	106294	0	0	0	35.1739	46.1545	22.3478
858	38684	0	1	1	0	0	0	0	0	0	0	0	0	0	0	-2.69	0.7451	24700.8	63538.1	87153.5	106864	0	0	0	35.1738	46.1677	27.1747
859	38685	0	1	1	0	0	0	0	0	0	0	0	0	0	0	-4.53	0.9882	25761.4	64341.4	87742.2	107444	0	0	0	35.1737	46.1809	29.3869
860	38686	0	1	1	0	0	1	0	0	0	0	0	0	0	0	-4.53	0.9882	26832.8	65156.8	88343.3	108034	0	0	0	35.1735	46.1941	25.7195
861	38687	0	1	1	0	0	0	0	0	0	0	0	0	0	0	-4.53	0.9882	27911.3	65984	88956.5	108635	0	0	0	35.1734	46.2072	40.073
862	38688	0	1	1	0	0	0	0	0	0	0	0	0	0	0	-4.53	0.9882	28999.3	66822.5	89581.5	109245	0	0	0	35.1733	46.2204	34.529
863	38936	0	0	0	0	0	0	0	0	0	0	0	0	0	0	-0.26	0.0678	23971	46310.8	75005.4	92944.9	0	0	0	35.1666	45.6933	17.5756
864	38937	0	0	0	0	0	1	0	0	0	0	0	0	0	0	0.17	0	22900.9	46300.4	75000.6	93055.9	0	0	0	35.1666	45.7064	7.27861
865	38938	0	0	0	0	0	0	0	0	0	0	0	0	0	0	0.17	0	21844.2	46321.2	75015	93182.2	0	0	0	35.1665	45.7196	0.473891
866	38939	0	0	0	0	0	0	0	0	0	0	0	0	0	0	0.17	0	20803.1	46372.9	75048.6	93323.7	0	0	0	35.1664	45.7328	21.3333
867	38940	0	0	0	0	0	0	0	0	0	0	0	0	0	0	0.17	0	19780	46455.7	75101.3	93480.5	0	0	0	35.1663	45.746	23.312
868	38941	0	0	0	0	1	0	0	0	0	0	0	0	0	0	0.13	0	18777.9	46569.2	75173.2	93652.3	0	0	0	35.1662	45.7591	17.2011
869	38942	0	0	0	0	1	1	0	0	0	0	0	0	0	0	0.13	0	17800.3	46713.3	75264.1	93839.2	0	0	0	35.1662	45.7723	18.0771
870	38943	0	0	0	0	1	1	0	0	0	0	0	0	0	0	0.13	0	16851.4	46887.6	75374.1	94041.1	0	0	0	35.1661	45.7855	16.0532
871	38944	0	0	0	0	1	1	0	0	0	0	0	0	0	0	0.13	0	15936.4	47091.9	75502.9	94257.7	0	0	0	35.166	45.7987	0.004586
872	38945	0	0	0	0	1	0	0	0	0	0	0	0	0	0	0.14	0	15061.5	47325.8	75650.6	94489.2	0	0	0	35.1659	45.8118	9.7782
873	38946	0	0	0	0	1	0	0	0	0	0	0	0	0	0	0.14	0	14234.1	47588.8	75817	94735.2	0	0	0	35.1658	45.825	4.65127
874	38947	0	0	0	0	1	1	0	0	0	0	0	0	0	0	0.14	0	13462.9	47880.4	76001.9	94995.8	0	0	0	35.1657	45.8382	23.8799
875	38948	0	0	0	0	1	0	0	0	0	0	0	0	0	0	0.14	0	12758.1	48200.1	76205.3	95270.8	0	0	0	35.1656	45.8514	25.9916
876	38949	0	0	0	0	1	0	0	0	0	0	0	0	0	0	0.15	0	12131.4	48547.4	76427	95560	0	0	0	35.1655	45.8645	15.5688
877	38950	0	0	0	0	1	0	0	0	0	0	0	0	0	0	0.15	0	11595.3	48921.7	76666.9	95863.4	0	0	0	35.1654	45.8777	18.3378
878	38951	0	0	0	0	1	0	0	0	0	0	0	0	0	0	0.15	0	11162.9	49322.3	76924.7	96180.9	0	0	0	35.1653	45.8909	10.6591
879	38952	0	0	0	0	1	1	0	0	0	0	0	0	0	0	0.15	0	10846.7	49748.7	77200.3	96512.2	0	0	0	35.1652	45.9041	9.57515
880	38953	0	0	0	0	1	0	0	0	0	0	0	0	0	0	0.18	0	10656.9	50200.1	77493.5	96857.2	0	0	0	35.1651	45.9172	6.05409
881	38954	0	0	0	0	1	0	0	0	0	0	0	0	0	0	0.18	0	10600.5	50675.9	77804.2	97215.8	0	0	0	35.165	45.9304	6.33045
882	38955	0	0	0	0	1	0	0	0	0	0	0	0	0	0	0.18	0	10679.4	51175.5	78132	97587.9	0	0	0	35.1649	45.9436	7.35976
883	38956	0	0	0	0	1	1	0	0	0	0	0	0	0	0	0.18	0	10890.8	51698.1	78476.8	97973.3	0	0	0	35.1648	45.9568	2.67521
884	38957	0	0	0	0	0	0	0	0	0	0	0	0	0	0	0.32	0	11227.2	52243	78838.4	98371.7	0	0	0	35.1647	45.9699	6.77745
885	38958	0	0	0	0	0	1	0	0	0	0	0	0	0	0	0.32	0	11677.8	52809.6	79216.5	98783.2	0	0	0	35.1646	45.9831	5.48231
886	38959	0	0	0	0	0	0	0	0	0	0	0	0	0	0	0.32	0	12229.9	53397.1	79610.9	99207.5	0	0	0	35.1645	45.9963	2.8704
887	38960	0	0	0	0	0	0	0	0	0	0	0	0	0	0	0.32	0	12870.5	54004.9	80021.3	99644.4	0	0	0	35.1644	46.0095	3.41068
888	38961	0	0	0	0	0	1	0	0	0	0	0	0	0	0	-0.02	0.1101	13587.1	54632.3	80447.6	100094	0	0	0	35.1643	46.0226	3.87452
889	38962	0	0	0	0	0	0	0	0	0	0	0	0	0	0	-0.02	0.1101	14368.4	55278.7	80889.4	100555	0	0	0	35.1642	46.0358	18.5089
890	38963	0	0	0	0	0	1	0	0	0	0	0	0	0	0	-0.02	0.1101	15204.3	55943.3	81346.5	101029	0	0	0	35.1641	46.049	34.9443
891	38964	0	0	0	0	0	1	0	0	0	0	0	0	0	0	-0.02	0.1101	16086.3	56625.5	81818.6	101515	0	0	0	35.164	46.0622	26.8575
892	38965	0	0	0	0	0	1	0	0	0	0	0	0	0	0	-1.19	0.3957	17007.4	57324.8	82305.6	102013	0	0	0	35.1638	46.0753	12.9393
893	38966	0	0	0	0	0	0	0	0	0	0	0	0	0	0	-1.19	0.3957	17961.3	58040.4	82807.1	102522	0	0	0	35.1637	46.0885	10.2563
894	38967	0	0	0	0	0	0	0	0	0	0	0	0	0	0	-1.19	0.3957	18943.3	58771.8	83322.8	103043	0	0	0	35.1636	46.1017	32.3758
895	38968	0	0	0	0	0	0	0	0	0	0	0	0	0	0	-1.19	0.3957	19949.2	59518.5	83852.5	103575	0	0	0	35.1635	46.1149	33.0651
896	38969	0	1	1	0	0	0	0	0	0	0	0	0	0	0	-2.69	0.7451	20975.5	60279.8	84396	104118	0	0	0	35.1634	46.128	37.9675
897	38970	0	1	1	0	0	0	0	0	0	0	0	0	0	0	-2.69	0.7451	22019.3	61055.1	84953	104672	0	0	0	35.1632	46.1412	37.6068
898	38971	0	0	0	0	0	1	0	0	0	0	0	0	0	0	-1.2	0.5974	23078.3	61844.1	85523.2	105237	0	0	0	35.1631	46.1544	25.5467
899	38972	0	0	0	0	0	0	0	0	0	0	0	0	0	0	-1.2	0.5974	24149.5	62646.1	86106.3	105812	0	0	0	35.163	46.1676	17.71
900	38973	0	1	1	0	0	1	0	0	0	0	0	0	0	0	-2.84	0.8054	25228.6	63460.6	86702.1	106398	0	0	0	35.1629	46.1807	33.7553
901	38974	0	1	1	0	0	0	0	0	0	0	0	0	0	0	-2.84	0.8054	26318.1	64287.2	87310.3	106994	0	0	0	35.1627	46.1939	33.5872
902	38975	0	1	1	0	0	0	0	0	0	0	0	0	0	0	-2.84	0.8054	27416.8	65125.5	87930.7	107600	0	0	0	35.1626	46.2071	24.6792
903	38976	0	1	1	0	0	0	0	0	0	0	0	0	0	0	-2.84	0.8054	28523.7	65974	88563	108216	0	0	0	35.1625	46.2203	24.8372
904	38977	0	1	1	0	0	0	0	0	0	0	0	0	0	0	-2.84	0.8054	29637.8	66832.4	89207	108842	0	0	0	35.1623	46.2334	39.9842
905	39214	0	0	0	0	0	1	0	0	0	0	0	0	0	0	0.09	0.0018	34793.8	46936.2	74919	91487.5	0	0	0	35.1565	45.5614	15.3977
906	39215	0	0	0	0	0	1	0	0	0	0	0	0	0	0	0.09	0.0018	33640	46618.1	74721.7	91442.9	0	0	0	35.1564	45.5746	3.82961
907	39216	0	0	0	0	0	1	0	0	0	0	0	0	0	0	0.09	0.0018	32489.5	46328.9	74543.2	91414	0	0	0	35.1564	45.5878	16.5088
908	39217	0	0	0	0	0	1	0	0	0	0	0	0	0	0	-0.27	0.0667	31342.8	46069.2	74383.7	91400.9	0	0	0	35.1563	45.6009	7.75036
909	39218	0	0	0	0	0	0	0	0	0	0	0	0	0	0	-0.27	0.0667	30200.2	45839.4	74243.2	91403.5	0	0	0	35.1562	45.6141	5.19815
910	39219	0	0	0	0	0	1	0	0	0	0	0	0	0	0	-0.27	0.0667	29062.2	45640	74121.9	91421.9	0	0	0	35.1562	45.6273	9.44885
911	39220	0	0	0	0	0	0	0	0	0	0	0	0	0	0	-0.27	0.0667	27929.4	45471.4	74019.8	91456	0	0	0	35.1561	45.6405	12.6814
912	39221	0	0	0	0	0	1	0	0	0	0	0	0	0	0	-0.26	0.0678	26802.4	45334	73937.1	91505.8	0	0	0	35.156	45.6536	4.2164
913	39222	0	0	0	0	0	1	0	0	0	0	0	0	0	0	-0.26	0.0678	25682.1	45228	73873.7	91571.4	0	0	0	35.156	45.6668	19.508
914	39223	0	0	0	0	0	0	0	0	0	0	0	0	0	0	-0.26	0.0678	24569.3	45153.6	73829.9	91652.6	0	0	0	35.1559	45.68	21.906
915	39224	0	0	0	0	0	0	0	0	0	0	0	0	0	0	-0.26	0.0678	23465.1	45111.1	73805.5	91749.4	0	0	0	35.1558	45.6932	12.4239
916	39225	0	0	0	0	0	0	0	0	0	0	0	0	0	0	0.17	0	22370.7	45100.4	73800.6	91861.9	0	0	0	35.1557	45.7063	8.84684
917	39226	0	0	0	0	0	0	0	0	0	0	0	0	0	0	0.17	0	21287.8	45121.7	73815.2	91989.8	0	0	0	35.1557	45.7195	22.7277
918	39227	0	0	0	0	0	0	0	0	0	0	0	0	0	0	0.17	0	20218.1	45174.9	73849.4	92133.2	0	0	0	35.1556	45.7327	21.1808
919	39228	0	0	0	0	0	1	0	0	0	0	0	0	0	0	0.17	0	19163.8	45259.8	73903	92291.9	0	0	0	35.1555	45.7459	9.01381
920	39229	0	0	0	0	1	0	0	0	0	0	0	0	0	0	0.13	0	18127.6	45376.3	73976	92466	0	0	0	35.1554	45.759	5.8744
921	39230	0	0	0	0	1	1	0	0	0	0	0	0	0	0	0.13	0	17112.9	45524.2	74068.4	92655.3	0	0	0	35.1553	45.7722	0.893514
922	39231	0	0	0	0	1	1	0	0	0	0	0	0	0	0	0.13	0	16123.6	45703.1	74180.1	92859.7	0	0	0	35.1552	45.7854	0.004637
923	39232	0	0	0	0	1	1	0	0	0	0	0	0	0	0	0.13	0	15164.8	45912.6	74311	93079.1	0	0	0	35.1552	45.7986	0.004565
924	39233	0	0	0	0	1	0	0	0	0	0	0	0	0	0	0.14	0	14242.5	46152.5	74461.1	93313.5	0	0	0	35.1551	45.8117	0.00457
925	39234	0	0	0	0	1	1	0	0	0	0	0	0	0	0	0.14	0	13364.5	46422.1	74630.1	93562.6	0	0	0	35.155	45.8249	0.004583
926	39235	0	0	0	0	1	1	0	0	0	0	0	0	0	0	0.14	0	12539.9	46721	74818	93826.4	0	0	0	35.1549	45.8381	8.60908
927	39236	0	0	0	0	1	1	0	0	0	0	0	0	0	0	0.14	0	11780.1	47048.6	75024.6	94104.8	0	0	0	35.1548	45.8513	23.5852
928	39237	0	0	0	0	1	0	0	0	0	0	0	0	0	0	0.15	0	11098.2	47404.3	75249.8	94397.7	0	0	0	35.1547	45.8644	8.23293
929	39238	0	0	0	0	1	0	0	0	0	0	0	0	0	0	0.15	0	10509.5	47787.6	75493.4	94704.8	0	0	0	35.1546	45.8776	5.45855
930	39239	0	0	0	0	1	0	0	0	0	0	0	1	0	0	0.15	0	10030.5	48197.6	75755.2	95026.1	0	0	0	35.1545	45.8908	4.10798
931	39240	0	0	0	0	1	1	0	0	0	0	0	1	0	0	0.15	0	9677.29	48633.8	76035.1	95361.4	0	0	0	35.1544	45.904	13.1028
932	39241	0	0	0	0	1	1	0	0	0	0	0	1	0	0	0.18	0	9464.14	49095.5	76332.8	95710.6	0	0	0	35.1543	45.9171	4.71819
933	39242	0	0	0	0	1	1	0	0	0	0	0	1	0	0	0.18	0	9400.53	49582	76648.1	96073.5	0	0	0	35.1542	45.9303	8.04819
934	39243	0	0	0	0	1	1	0	0	0	0	0	1	0	0	0.18	0	9489.47	50092.4	76980.8	96450	0	0	0	35.1541	45.9435	15.1316
935	39244	0	0	0	0	1	0	0	0	0	0	0	1	0	0	0.18	0	9726.77	50626.2	77330.8	96839.9	0	0	0	35.154	45.9566	11.5563
936	39245	0	0	0	0	0	0	0	0	0	0	0	0	0	0	0.32	0	10102	51182.5	77697.7	97243	0	0	0	35.1539	45.9698	7.57175
937	39246	0	0	0	0	0	0	0	0	0	0	0	0	0	0	0.32	0	10600.5	51760.7	78081.3	97659.2	0	0	0	35.1538	45.983	14.4506
938	39247	0	0	0	0	0	0	0	0	0	0	0	0	0	0	0.32	0	11205.8	52360	78481.4	98088.3	0	0	0	35.1537	45.9962	2.07754
939	39248	0	0	0	0	0	1	0	0	0	0	0	0	0	0	0.32	0	11901.7	52979.7	78897.7	98530.2	0	0	0	35.1536	46.0093	4.43249
940	39249	0	0	0	0	0	1	0	0	0	0	0	0	0	0	0.32	0	12673.2	53619.1	79330	98984.6	0	0	0	35.1535	46.0225	12.7321
941	39250	0	0	0	0	0	1	0	0	0	0	0	0	0	0	-0.02	0.1101	13507.4	54277.5	79778	99451.5	0	0	0	35.1534	46.0357	14.3152
942	39251	0	0	0	0	0	0	0	0	0	0	0	0	0	0	0.41	0.0701	14393.4	54954.3	80241.4	99930.6	0	0	0	35.1533	46.0489	19.4976
943	39252	0	0	0	0	0	1	0	0	0	0	0	0	0	0	0.41	0.0701	15322.2	55648.6	80720.1	100422	0	0	0	35.1531	46.062	31.7803
944	39253	0	0	0	0	0	1	0	0	0	0	0	0	0	0	0.41	0.0701	16286.5	56360	81213.6	100925	0	0	0	35.153	46.0752	25.3427
945	39254	0	0	0	0	0	0	0	0	0	0	0	0	0	0	-0.22	0.3022	17280.3	57087.7	81721.8	101439	0	0	0	35.1529	46.0884	10.8144
946	39255	0	0	0	0	0	0	0	0	0	0	0	0	0	0	-0.22	0.3022	18298.9	57831.2	82244.3	101966	0	0	0	35.1528	46.1015	38.0694
947	39256	0	0	0	0	0	1	0	0	0	0	0	0	0	0	-0.22	0.3022	19338.3	58589.8	82781	102503	0	0	0	35.1527	46.1147	39.7993
948	39257	0	0	0	0	0	0	0	0	0	0	0	0	0	0	-0.22	0.3022	20395.3	59363	83331.4	103052	0	0	0	35.1525	46.1279	29.0199
949	39258	0	0	0	0	0	0	0	0	0	0	0	0	0	0	-1.2	0.5974	21466.3	60150.2	83895.5	103612	0	0	0	35.1524	46.1411	24.9463
950	39259	0	0	0	0	0	0	0	0	0	0	0	0	0	0	-1.2	0.5974	22546	60950.9	84472.8	104182	0	0	0	35.1523	46.1542	21.7511
951	39260	0	0	0	0	0	0	0	0	0	0	0	0	0	0	-1.2	0.5974	23637.3	61764.5	85063.1	104764	0	0	0	35.1522	46.1674	24.7316
952	39261	0	0	0	0	0	1	0	0	0	0	0	0	0	0	-1.2	0.5974	24738.6	62590.5	85666.2	105355	0	0	0	35.152	46.1806	15.4753
953	39262	0	1	1	0	0	0	0	0	0	0	0	0	0	0	-2.84	0.8054	25848.8	63428.5	86281.7	105957	0	0	0	35.1519	46.1938	40.4717
954	39263	0	1	1	0	0	0	0	0	0	0	0	0	0	0	-2.84	0.8054	26966.6	64277	86909.4	106569	0	0	0	35.1518	46.2069	20.1151
955	39264	0	1	1	0	0	0	0	0	0	0	0	0	0	0	-2.84	0.8054	28064.4	65135.6	87549.1	107191	0	0	0	35.1516	46.2201	24.5931
956	39265	0	1	1	0	0	0	0	0	0	0	0	0	0	0	-2.84	0.8054	29163.2	66004.9	88200.5	107823	0	0	0	35.1515	46.2333	27.4361
957	39493	0	0	0	0	0	1	0	0	0	0	0	0	0	0	0.01	0	45052.5	49936.5	76370.5	91406.1	0	0	0	35.1462	45.4428	21.9487
958	39494	0	0	0	0	0	1	0	0	0	0	0	0	0	0	0.01	0	43873.1	49375.8	76006.6	91219.5	0	0	0	35.1461	45.456	24.8547
959	39495	0	0	0	0	0	0	0	0	0	0	0	0	0	0	0.01	0	42694.8	48838.2	75660.1	91048.3	0	0	0	35.1461	45.4691	29.6232
960	39496	0	0	0	0	0	1	0	0	0	0	0	0	0	0	0.01	0	41517.8	48324.4	75331.1	90892.7	0	0	0	35.146	45.4823	13.674
961	39497	0	0	0	0	0	1	0	0	0	0	0	0	0	0	0.03	0	40342.2	47835.2	75019.8	90752.6	0	0	0	35.146	45.4955	13.9846
962	39498	0	0	0	0	0	1	0	0	0	0	0	0	0	0	0.03	0	39168	47371.4	74726.5	90628.3	0	0	0	35.1459	45.5087	34.8339
963	39499	0	0	0	0	0	0	0	0	0	0	0	0	0	0	0.03	0	37995.4	46933.7	74451.4	90519.6	0	0	0	35.1458	45.5218	35.0317
964	39500	0	0	0	0	0	1	0	0	0	0	0	0	0	0	0.03	0	36824.6	46522.8	74194.7	90426.8	0	0	0	35.1458	45.535	25.0052
965	39501	0	0	0	0	0	1	0	0	0	0	0	0	0	0	0.09	0.0018	35655.7	46139.5	73956.5	90349.8	0	0	0	35.1457	45.5482	16.9739
966	39502	0	0	0	0	0	0	0	0	0	0	0	0	0	0	0.09	0.0018	34489	45784.4	73737.2	90288.6	0	0	0	35.1457	45.5613	8.30155
967	39503	0	0	0	0	0	0	0	0	0	0	0	0	0	0	0.09	0.0018	33324.6	45458.2	73536.7	90243.4	0	0	0	35.1456	45.5745	6.18055
968	39504	0	0	0	0	0	0	0	0	0	0	0	0	0	0	0.09	0.0018	32162.9	45161.6	73355.4	90214.2	0	0	0	35.1455	45.5877	2.78285
969	39505	0	0	0	0	0	0	0	0	0	0	0	0	0	0	-0.27	0.0667	31004	44895.1	73193.2	90200.9	0	0	0	35.1455	45.6009	10.0365
970	39506	0	0	0	0	0	0	0	0	0	0	0	0	0	0	-0.27	0.0667	29848.5	44659.3	73050.5	90203.5	0	0	0	35.1454	45.614	5.41213
971	39507	0	0	0	0	0	0	1	0	0	0	0	0	0	0	-0.27	0.0667	28696.5	44454.6	72927.2	90222.2	0	0	0	35.1454	45.6272	7.64584
972	39508	0	0	0	0	0	0	0	0	0	0	0	0	0	0	-0.27	0.0667	27548.7	44281.5	72823.4	90256.7	0	0	0	35.1453	45.6404	5.37426
973	39509	0	0	0	0	0	0	0	0	0	0	0	0	0	0	-0.26	0.0678	26405.5	44140.3	72739.3	90307.3	0	0	0	35.1452	45.6536	3.10499
974	39510	0	0	0	0	0	1	0	0	0	0	0	0	0	0	-0.26	0.0678	25267.6	44031.5	72675	90373.7	0	0	0	35.1451	45.6667	6.81965
975	39511	0	0	0	0	0	0	0	0	0	0	0	0	0	0	-0.26	0.0678	24135.7	43955.1	72630.4	90456	0	0	0	35.1451	45.6799	26.9218
976	39512	0	0	0	0	0	0	1	0	0	0	0	0	0	0	-0.26	0.0678	23010.7	43911.4	72605.6	90554.1	0	0	0	35.145	45.6931	9.22195
977	39513	0	0	0	0	0	0	1	0	0	0	0	0	0	0	0.17	0	21893.6	43900.5	72600.6	90668	0	0	0	35.1449	45.7062	25.7552
978	39514	0	0	0	0	0	0	1	0	0	0	0	0	0	0	0.17	0	20785.8	43922.3	72615.5	90797.6	0	0	0	35.1448	45.7194	2.16106
979	39515	0	0	0	0	0	0	0	0	0	0	0	0	0	0	0.17	0	19688.8	43976.9	72650.2	90942.8	0	0	0	35.1448	45.7326	1.64962
980	39516	0	0	0	0	0	0	0	0	0	0	0	0	0	0	0.17	0	18604.6	44064.2	72704.7	91103.7	0	0	0	35.1447	45.7458	0.004609
981	39517	0	0	0	0	0	1	0	0	0	0	0	0	0	0	0.17	0	17535.4	44183.8	72778.9	91280	0	0	0	35.1446	45.7589	0.004548
982	39518	0	0	0	0	1	1	0	0	0	0	0	0	0	0	0.13	0	16484.2	44335.7	72872.8	91471.7	0	0	0	35.1445	45.7721	0.072906
983	39520	0	0	0	0	1	0	0	0	0	0	0	0	0	0	0.13	0	14451.6	44734.4	73119.4	91901	0	0	0	35.1443	45.7985	3.62326
984	39521	0	0	0	0	1	1	0	0	0	0	0	0	0	0	0.13	0	13480.7	44980.6	73271.9	92138.4	0	0	0	35.1443	45.8116	4.05547
985	39522	0	0	0	0	1	1	0	0	0	0	0	0	0	0	0.14	0	12549.5	45257.2	73443.6	92390.7	0	0	0	35.1442	45.8248	0.022696
986	39523	0	0	0	0	1	1	0	0	0	0	0	0	0	0	0.14	0	11667.5	45563.7	73634.6	92657.9	0	0	0	35.1441	45.838	8.2548
987	39524	0	0	0	0	1	1	0	0	0	0	0	0	0	0	0.14	0	10846.7	45899.6	73844.5	92939.8	0	0	0	35.144	45.8511	28.1229
988	39525	0	0	0	0	1	0	0	0	0	0	0	0	0	0	0.14	0	10102	46264.1	74073.3	93236.3	0	0	0	35.1439	45.8643	11.7247
989	39528	0	0	0	0	1	0	0	0	0	0	0	1	0	0	0.15	0	8516.46	47523.2	74870.9	94211.9	0	0	0	35.1436	45.9038	4.32865
990	39529	0	0	0	0	1	1	0	0	0	0	0	1	0	0	0.15	0	8273.45	47995.5	75173.2	94565.3	0	0	0	35.1435	45.917	11.2845
991	39530	0	0	0	0	0	1	0	0	0	0	0	0	0	0	0.24	0	8200.61	48493	75493.4	94932.6	0	0	0	35.1434	45.9302	15.779
992	39531	0	0	0	0	0	1	0	0	0	0	0	0	0	0	0.24	0	8302.41	49014.8	75831.2	95313.6	0	0	0	35.1433	45.9433	14.9307
993	39532	0	0	0	0	0	0	0	0	0	0	0	0	0	0	0.24	0	8572.63	49560.2	76186.4	95708.1	0	0	0	35.1432	45.9565	17.8995
994	39533	0	0	0	0	0	1	0	0	0	0	0	0	0	0	0.24	0	8996.11	50128.3	76558.8	96116	0	0	0	35.1431	45.9697	20.5584
995	39534	0	0	0	0	1	1	0	0	0	0	0	0	0	0	0.39	0	9552.49	50718.5	76948.1	96537	0	0	0	35.143	45.9829	6.4226
996	39535	0	0	0	0	1	0	0	0	0	0	0	0	0	0	0.39	0	10220.1	51330	77354.1	96971.1	0	0	0	35.1429	45.996	16.3566
997	39536	0	0	0	0	1	1	0	0	0	0	0	0	0	0	0.39	0	10978.6	51962	77776.4	97418.1	0	0	0	35.1428	46.0092	11.5211
998	39537	0	0	0	0	1	0	0	0	0	0	0	0	0	0	0.39	0	11810.6	52613.8	78214.9	97877.7	0	0	0	35.1427	46.0224	27.4701
999	39538	0	0	0	0	0	0	0	0	0	0	0	0	0	0	0.41	0.0701	12701.6	53284.6	78669.2	98349.8	0	0	0	35.1425	46.0355	26.9787
1000	39539	0	0	0	0	0	1	0	0	0	0	0	0	0	0	0.41	0.0701	13640	53973.8	79139.2	98834.2	0	0	0	35.1424	46.0487	24.6841
1001	39540	0	0	0	0	0	0	0	0	0	0	0	0	0	0	0.41	0.0701	14616.8	54680.6	79624.4	99330.8	0	0	0	35.1423	46.0619	27.8347
1002	39541	0	0	0	0	0	1	0	0	0	0	0	0	0	0	0.41	0.0701	15624.7	55404.4	80124.7	99839.3	0	0	0	35.1422	46.0751	13.7998
1003	39542	0	0	0	0	0	0	0	0	0	0	0	0	0	0	-0.22	0.3022	16658	56144.5	80639.8	100360	0	0	0	35.1421	46.0882	22.6382
1004	39543	0	0	0	0	0	1	0	0	0	0	0	0	0	0	-0.22	0.3022	17712.4	56900.4	81169.3	100891	0	0	0	35.142	46.1014	31.8523
1005	39544	0	0	0	0	0	0	0	0	0	0	0	0	0	0	-0.22	0.3022	18783	57671.2	81713	101435	0	0	0	35.1418	46.1146	38.3316
1006	39545	0	0	0	0	0	0	0	0	0	0	0	0	0	0	-0.22	0.3022	19863.5	58456.6	82270.6	101989	0	0	0	35.1417	46.1277	29.652
1007	39546	0	0	0	0	0	0	0	0	0	0	0	0	0	0	-1.2	0.5974	20957.1	59255.8	82841.8	102555	0	0	0	35.1416	46.1409	17.2656
1008	39547	0	0	0	0	0	0	0	0	0	0	0	0	0	0	-1.2	0.5974	22061.7	60068.4	83426.4	103131	0	0	0	35.1415	46.1541	32.5886
1009	39548	0	0	0	0	0	1	0	0	0	0	0	0	0	0	-1.2	0.5974	23175.8	60893.8	84024.1	103718	0	0	0	35.1414	46.1673	15.7409
1010	39549	0	0	0	0	0	0	0	0	0	0	0	0	0	0	-1.2	0.5974	24291.8	61731.4	84634.6	104316	0	0	0	35.1412	46.1804	20.4273
1011	39550	0	1	1	0	0	1	0	0	0	0	0	0	0	0	-2.84	0.8054	25383.7	62579.9	85257.6	104924	0	0	0	35.1411	46.1936	38.9962
1012	39551	0	1	1	0	0	0	0	0	0	0	0	0	0	0	-2.84	0.8054	26484.7	63438.9	85892.8	105542	0	0	0	35.141	46.2068	32.1292
1013	39552	0	1	1	0	0	1	0	0	0	0	0	0	0	0	-2.84	0.8054	27576.8	64308.7	86540	106170	0	0	0	35.1408	46.2199	20.2821
1014	39553	0	1	1	0	0	0	0	0	0	0	0	0	0	0	-2.84	0.8054	28677.5	65189	87198.9	106808	0	0	0	35.1407	46.2331	23.1007
1015	39777	0	0	0	0	0	0	0	0	0	0	0	0	0	0	0.01	0	49596.5	51393.1	76877.9	91132.6	0	0	0	35.1355	45.39	11.3256
1016	39778	0	0	0	0	0	1	0	0	0	0	0	0	0	0	0.01	0	48408.8	50735.1	76441.2	90882.1	0	0	0	35.1355	45.4032	6.00209
1017	39779	0	0	0	0	0	0	0	0	0	0	0	0	0	0	0.01	0	47221.7	50097.2	76020.9	90646.8	0	0	0	35.1354	45.4164	1.35626
1018	39780	0	0	0	0	0	0	0	0	0	0	0	0	0	0	0.01	0	46035.3	49480.2	75617.3	90426.8	0	0	0	35.1354	45.4296	12.1096
1019	39781	0	0	0	0	0	1	0	0	0	0	0	0	0	0	0.01	0	44849.6	48884.9	75230.6	90222.2	0	0	0	35.1353	45.4427	4.65221
1020	39782	0	0	0	0	0	1	0	0	0	0	0	0	0	0	0.01	0	43664.7	48312	74861.3	90033.1	0	0	0	35.1353	45.4559	5.39164
1021	39783	0	0	0	0	0	0	0	0	0	0	0	0	0	0	0.01	0	42480.7	47762.4	74509.4	89859.7	0	0	0	35.1352	45.4691	12.6766
1022	39784	0	0	0	0	0	1	0	0	0	0	0	0	0	0	0.01	0	41297.6	47237	74175.3	89702	0	0	0	35.1352	45.4822	31.1529
1023	39785	0	0	0	0	0	1	0	0	0	0	0	0	0	0	0.03	0	40115.5	46736.4	73859.1	89560	0	0	0	35.1351	45.4954	17.203
1024	39786	0	0	0	0	0	1	0	0	0	0	0	0	0	0	0.03	0	38934.4	46261.5	73561.2	89434	0	0	0	35.1351	45.5086	21.1281
1025	39787	0	0	0	0	0	1	0	0	0	0	0	0	0	0	0.03	0	37754.6	45813.2	73281.7	89323.9	0	0	0	35.135	45.5218	42.1748
1026	39788	0	0	0	0	0	1	0	0	0	0	0	0	0	0	0.03	0	36576.1	45392.2	73020.9	89229.8	0	0	0	35.135	45.5349	15.5286
1027	39789	0	0	0	0	0	1	0	0	0	0	0	0	0	0	0.03	0	35399	44999.2	72778.9	89151.8	0	0	0	35.1349	45.5481	23.101
1028	39790	0	0	0	0	0	1	0	0	0	0	0	0	0	0	0.09	0.0018	34223.5	44635.1	72556	89089.8	0	0	0	35.1349	45.5613	14.6858
1029	39791	0	0	0	0	0	1	0	0	0	0	0	0	0	0	0.09	0.0018	33049.8	44300.5	72352.3	89044	0	0	0	35.1348	45.5744	1.62878
1030	39792	0	0	0	0	0	0	0	0	0	0	0	0	0	0	0.09	0.0018	31878	43996	72167.9	89014.4	0	0	0	35.1347	45.5876	4.83777
1031	39793	0	0	0	0	0	1	1	0	0	0	0	0	0	0	0.09	0.0018	30708.5	43722.4	72003.1	89000.9	0	0	0	35.1347	45.6008	7.04866
1032	39794	0	0	0	0	0	0	0	0	0	0	0	0	0	0	-0.27	0.0667	29541.3	43480.2	71858	89003.6	0	0	0	35.1346	45.614	10.7628
1033	39795	0	0	0	0	0	0	0	0	0	0	0	0	0	0	-0.27	0.0667	28376.9	43270	71732.6	89022.5	0	0	0	35.1345	45.6271	1.37866
1034	39796	0	0	0	0	0	0	0	0	0	0	0	0	0	0	-0.27	0.0667	27215.6	43092.1	71627.2	89057.5	0	0	0	35.1345	45.6403	15.5446
1035	39797	0	0	0	0	0	0	0	0	0	0	0	0	0	0	-0.27	0.0667	26057.8	42947.1	71541.7	89108.7	0	0	0	35.1344	45.6535	3.54568
1036	39798	0	0	0	0	0	1	0	0	0	0	0	0	0	0	-0.26	0.0678	24904	42835.1	71476.2	89176	0	0	0	35.1343	45.6666	2.76577
1037	39799	0	0	0	0	0	0	0	0	0	0	0	0	0	0	-0.26	0.0678	23754.8	42756.6	71430.9	89259.4	0	0	0	35.1342	45.6798	21.4819
1038	39800	0	0	0	0	0	0	0	0	0	0	0	0	0	0	-0.26	0.0678	22610.8	42711.7	71405.7	89358.8	0	0	0	35.1342	45.693	26.6741
1039	39801	0	0	0	0	0	0	0	0	0	0	0	0	0	0	-0.26	0.0678	21473	42700.5	71400.6	89474.2	0	0	0	35.1341	45.7062	11.8431
1040	39802	0	0	0	0	0	0	0	0	0	0	0	0	0	0	0.17	0	20342.3	42722.9	71415.8	89605.6	0	0	0	35.134	45.7193	22.0114
1041	39803	0	0	0	0	0	1	0	0	0	0	0	0	0	0	0.17	0	19220	42779.1	71451	89752.8	0	0	0	35.1339	45.7325	0.004553
1042	39804	0	0	0	0	0	0	0	0	0	0	0	0	0	0	0.17	0	18107.7	42868.8	71506.4	89915.7	0	0	0	35.1339	45.7457	0.004553
1043	39805	0	0	0	0	0	1	0	0	0	0	0	0	0	0	0.17	0	17007.4	42991.7	71581.9	90094.4	0	0	0	35.1338	45.7588	5.21681
1044	39807	0	0	0	0	1	0	0	0	0	0	0	0	0	0	0.13	0	14852.9	43336.5	71792.8	90498.4	0	0	0	35.1336	45.7852	13.6055
1045	39808	0	0	0	0	1	0	0	0	0	0	0	0	0	0	0.13	0	13806.2	43557.4	71928.1	90723.5	0	0	0	35.1335	45.7983	3.6281
1046	39809	0	0	0	0	1	0	1	0	0	0	0	0	0	0	0.18	0	12786.3	43810.2	72083.1	90963.9	0	0	0	35.1334	45.8115	5.20358
1047	39810	0	0	0	0	1	0	0	0	0	0	0	0	0	0	0.2	0	11800.4	44094.1	72257.7	91219.5	0	0	0	35.1333	45.8247	4.67951
1048	39811	0	0	0	0	1	1	1	0	0	0	0	0	0	0	0.2	0	10857.7	44408.7	72451.7	91490.1	0	0	0	35.1333	45.8379	1.01578
1049	39812	0	0	0	0	1	0	0	0	0	0	0	0	0	0	0.2	0	9970.46	44753.2	72665.1	91775.6	0	0	0	35.1332	45.851	15.7022
1050	39813	0	0	0	0	1	0	0	0	0	0	0	1	0	0	0.2	0	9154.78	45127	72897.5	92075.8	0	0	0	35.1331	45.8642	32.0426
1051	39814	0	0	0	0	1	1	0	0	0	0	0	1	0	0	0.21	0	8431.49	45529.4	73149	92390.7	0	0	0	35.133	45.8774	7.0668
1052	39815	0	0	0	0	1	0	0	0	0	0	0	1	0	0	0.21	0	7826.24	45959.7	73419.1	92720	0	0	0	35.1329	45.8905	14.1904
1053	39816	0	0	0	0	1	0	0	0	0	0	0	1	0	0	0.21	0	7368.17	46416.9	73707.9	93063.6	0	0	0	35.1328	45.9037	30.3975
1054	39817	0	0	0	0	1	1	0	0	0	0	0	1	0	0	0.21	0	7085.9	46900.4	74014.9	93421.4	0	0	0	35.1327	45.9169	24.5536
1055	39818	0	0	0	0	0	1	0	0	0	0	0	0	0	0	0.24	0	7000.71	47409.4	74340.1	93793.2	0	0	0	35.1326	45.9301	34.9061
1056	39819	0	0	0	0	0	1	0	0	0	0	0	0	0	0	0.24	0	7119.69	47943	74683.1	94178.8	0	0	0	35.1325	45.9432	14.3084
1057	39820	0	0	0	0	0	1	0	0	0	0	0	0	0	0	0.24	0	7433.03	48500.4	75043.8	94578	0	0	0	35.1324	45.9564	28.7159
1058	39821	0	0	0	0	0	1	0	0	0	0	0	0	0	0	0.24	0	7917.7	49080.9	75421.8	94990.7	0	0	0	35.1323	45.9696	25.3171
1059	39822	0	0	0	0	1	0	0	0	0	0	0	0	0	0	0.39	0	8544.59	49683.5	75817	95416.8	0	0	0	35.1322	45.9827	13.6087
1060	39823	0	0	0	0	1	1	0	0	0	0	0	0	0	0	0.39	0	9284.93	50307.6	76228.9	95855.9	0	0	0	35.1321	45.9959	6.36166
1061	39824	0	0	0	0	1	0	0	0	0	0	0	0	0	0	0.39	0	10113.9	50952.2	76657.5	96308	0	0	0	35.132	46.0091	6.03595
1062	39825	0	0	0	0	1	1	0	0	0	0	0	0	0	0	0.39	0	11011.4	51616.8	77102.3	96772.9	0	0	0	35.1318	46.0222	25.8984
1063	39826	0	0	0	0	0	1	0	0	0	0	0	0	0	0	0.41	0.0701	11962	52300.4	77563.2	97250.4	0	0	0	35.1317	46.0354	20.4968
1064	39827	0	0	0	0	0	0	0	0	0	0	0	0	0	0	0.41	0.0701	12954.2	53002.4	78039.8	97740.3	0	0	0	35.1316	46.0486	32.9201
1065	39828	0	0	0	0	0	0	0	0	0	0	0	0	0	0	0.41	0.0701	13978.9	53722	78531.8	98242.4	0	0	0	35.1315	46.0617	27.6454
1066	39829	0	0	0	0	0	0	0	0	0	0	0	0	0	0	0.41	0.0701	15029.6	54458.5	79039	98756.5	0	0	0	35.1314	46.0749	22.2103
1067	39830	0	0	0	0	0	1	0	0	0	0	0	0	0	0	-0.22	0.3022	16099.7	55211.3	79561.1	99282.4	0	0	0	35.1313	46.0881	22.0639
1068	39831	0	0	0	0	0	0	0	0	0	0	0	0	0	0	-0.22	0.3022	17181.4	55979.7	80097.8	99820	0	0	0	35.1311	46.1013	38.6586
1069	39832	0	0	0	0	0	1	0	0	0	0	0	0	0	0	-0.22	0.3022	18277.9	56763.1	80648.7	100369	0	0	0	35.131	46.1144	25.329
1070	39833	0	0	0	0	0	1	0	0	0	0	0	0	0	0	-0.22	0.3022	19386.6	57560.8	81213.6	100929	0	0	0	35.1309	46.1276	29.4657
1071	39834	0	0	0	0	0	0	0	0	0	0	0	0	0	0	-1.2	0.5974	20505.6	58372.3	81792.2	101501	0	0	0	35.1308	46.1408	40.1244
1072	39835	0	0	0	0	0	0	0	0	0	0	0	0	0	0	-1.2	0.5974	21609.5	59197	82384.3	102083	0	0	0	35.1307	46.1539	23.3539
1073	39836	0	0	0	0	0	0	0	0	0	0	0	0	0	0	-1.2	0.5974	22703.5	60034.4	82989.5	102676	0	0	0	35.1305	46.1671	34.8479
1074	39837	0	0	0	0	0	0	0	0	0	0	0	0	0	0	-1.2	0.5974	23802.5	60882.9	83607.5	103280	0	0	0	35.1304	46.1803	6.87146
1075	39838	0	1	1	0	0	1	0	0	0	0	0	0	0	0	-2.84	0.8054	24896.6	61742.1	84238.1	103894	0	0	0	35.1303	46.1934	28.8432
1076	39839	0	1	1	0	0	0	0	0	0	0	0	0	0	0	-2.84	0.8054	25995.6	62612.5	84880.9	104518	0	0	0	35.1301	46.2066	9.57446
1077	39840	0	1	1	0	0	0	0	0	0	0	0	0	0	0	-2.84	0.8054	27089.7	63493.7	85535.8	105152	0	0	0	35.13	46.2198	43.5136
1078	39841	0	1	1	0	0	0	0	0	0	0	0	0	0	0	-2.84	0.8054	28131.1	64385.2	86202.4	105796	0	0	0	35.1299	46.2329	34.3298
1079	40066	0	0	0	0	0	0	0	0	0	0	0	0	0	0	0.01	0	48249.9	49729.4	75321.5	89707.3	0	0	0	35.1247	45.4032	14.1008
1080	40067	0	0	0	0	0	0	0	0	0	0	0	0	0	0	0.01	0	47058.8	49078.4	74894.9	89468.9	0	0	0	35.1246	45.4163	2.54466
1081	40068	0	0	0	0	0	0	0	0	0	0	0	0	0	0	0.01	0	45868.2	48448.4	74485.2	89246	0	0	0	35.1246	45.4295	2.93106
1082	40069	0	0	0	0	0	0	0	0	0	0	0	0	0	0	0.01	0	44678.1	47840.3	74092.7	89038.6	0	0	0	35.1245	45.4427	6.51864
1083	40070	0	0	0	0	0	1	0	0	0	0	0	0	0	0	0.01	0	43488.5	47254.7	73717.6	88847.1	0	0	0	35.1245	45.4558	3.75372
1084	40071	0	0	0	0	0	1	0	0	0	0	0	0	0	0	0.01	0	42299.5	46692.7	73360.3	88671.3	0	0	0	35.1244	45.469	6.79816
1085	40072	0	0	0	0	0	1	0	0	0	0	0	0	0	0	0.01	0	41111.2	46155.1	73020.9	88511.5	0	0	0	35.1244	45.4822	8.8125
1086	40073	0	0	0	0	0	1	0	0	0	0	0	0	0	0	0.01	0	39923.6	45642.6	72699.7	88367.6	0	0	0	35.1243	45.4953	22.4621
1087	40074	0	0	0	0	0	1	0	0	0	0	0	0	0	0	0.03	0	38736.7	45156.3	72397	88239.9	0	0	0	35.1243	45.5085	41.3238
1088	40075	0	0	0	0	0	1	0	0	0	0	0	0	0	0	0.03	0	37550.6	44696.9	72113	88128.3	0	0	0	35.1242	45.5217	42.2875
1089	40076	0	0	0	0	0	0	0	0	0	0	0	0	0	0	0.03	0	36365.5	44265.2	71848	88032.9	0	0	0	35.1242	45.5349	13.1793
1090	40077	0	0	0	0	0	1	1	0	0	0	0	0	0	0	0.03	0	35181.4	43862.2	71602	87953.9	0	0	0	35.1241	45.548	38.9089
1091	40078	0	0	0	0	0	0	0	0	0	0	0	0	0	0	0.09	0.0018	33998.4	43488.5	71375.4	87891.1	0	0	0	35.124	45.5612	22.4457
1092	40079	0	0	0	0	0	1	0	0	0	0	0	0	0	0	0.09	0.0018	32816.6	43145	71168.3	87844.6	0	0	0	35.124	45.5744	8.62072
1093	40080	0	0	0	0	0	0	0	0	0	0	0	0	0	0	0.09	0.0018	31636.2	42832.3	70980.9	87814.6	0	0	0	35.1239	45.5875	6.26885
1094	40081	0	0	0	0	0	0	1	0	0	0	0	0	0	0	0.09	0.0018	30457.3	42551.3	70813.3	87800.9	0	0	0	35.1238	45.6007	16.9627
1095	40082	0	0	0	0	0	1	0	0	0	0	0	0	0	0	-0.27	0.0667	29280.2	42302.4	70665.8	87803.6	0	0	0	35.1238	45.6139	14.539
1096	40083	0	0	0	0	0	0	0	0	0	0	0	0	0	0	-0.27	0.0667	28105	42086.2	70538.3	87822.8	0	0	0	35.1237	45.627	13.1677
1097	40084	0	0	0	0	0	0	1	0	0	0	0	0	0	0	-0.27	0.0667	26932	41903.3	70431	87858.3	0	0	0	35.1236	45.6402	17.1278
1098	40085	0	0	0	0	0	0	0	0	0	0	0	0	0	0	-0.27	0.0667	25761.4	41754.2	70344.1	87910.2	0	0	0	35.1236	45.6534	1.42838
1099	40086	0	0	0	0	0	0	0	0	0	0	0	0	0	0	-0.26	0.0678	24593.7	41639	70277.5	87978.4	0	0	0	35.1235	45.6666	2.33476
1100	40087	0	0	0	0	0	0	1	0	0	0	0	0	0	0	-0.26	0.0678	23429.3	41558.3	70231.4	88062.9	0	0	0	35.1234	45.6797	4.74581
1101	40088	0	0	0	0	0	0	1	0	0	0	0	0	0	0	0.02	0.03	22268.6	41512	70205.8	88163.7	0	0	0	35.1234	45.6929	16.0327
1102	40089	0	0	0	0	0	0	1	0	0	0	0	0	0	0	0.02	0.03	21112.3	41500.5	70200.6	88280.7	0	0	0	35.1233	45.7061	17.2601
1103	40090	0	0	0	0	1	0	1	0	0	0	0	0	0	0	0.19	0	19961.2	41523.6	70216	88413.8	0	0	0	35.1232	45.7192	26.5958
1104	40091	0	0	0	0	1	0	1	0	0	0	0	0	0	0	0.19	0	18816.2	41581.4	70251.9	88563	0	0	0	35.1231	45.7324	12.8099
1105	40092	0	0	0	0	1	1	0	0	0	0	0	0	0	0	0.19	0	17678.5	41673.6	70308.3	88728.1	0	0	0	35.123	45.7456	0.138191
1106	40093	0	0	0	0	1	1	0	0	0	0	0	0	0	0	0.19	0	16549.6	41800.1	70385	88909.2	0	0	0	35.123	45.7587	7.16957
1107	40094	0	0	0	0	1	1	1	0	0	0	0	0	0	0	0.18	0	15431.5	41960.6	70482.1	89106	0	0	0	35.1229	45.7719	19.8995
1108	40095	0	0	0	0	1	0	0	0	0	0	0	0	0	0	0.18	0	14326.5	42154.6	70599.5	89318.5	0	0	0	35.1228	45.7851	6.33805
1109	40096	0	0	0	0	1	0	0	0	0	0	0	0	0	0	0.18	0	13238.2	42381.7	70737	89546.6	0	0	0	35.1227	45.7982	3.5851
1110	40097	0	0	0	0	1	0	0	0	0	0	0	0	0	0	0.18	0	12170.9	42641.4	70894.6	89790.2	0	0	0	35.1226	45.8114	8.55287
1111	40098	0	0	0	0	1	0	0	0	0	0	0	0	0	0	0.2	0	11130.6	42933.1	71072.1	90049.1	0	0	0	35.1225	45.8246	10.5683
1112	40099	0	0	0	0	1	0	0	0	0	0	0	0	0	0	0.2	0	10125.7	43256.1	71269.4	90323.2	0	0	0	35.1224	45.8377	16.5096
1113	40100	0	0	0	0	1	0	0	0	0	0	0	1	0	0	0.2	0	9167.88	43609.7	71486.3	90612.4	0	0	0	35.1223	45.8509	20.667
1114	40101	0	0	0	0	1	1	0	0	0	0	0	1	0	0	0.2	0	8273.45	43993.3	71722.6	90916.4	0	0	0	35.1223	45.8641	25.3933
1115	40102	0	0	0	0	1	1	1	0	0	0	0	1	0	0	0.21	0	7465.25	44406	71978.1	91235.3	0	0	0	35.1222	45.8773	24.6933
1116	40104	0	0	0	0	1	1	0	0	0	0	0	1	0	0	0.21	0	6239.39	45315.4	72546.1	91916.7	0	0	0	35.122	45.9036	15.299
1117	40105	0	0	0	0	1	1	0	0	0	0	0	1	0	0	0.21	0	5903.39	45810.6	72858	92278.9	0	0	0	35.1219	45.9168	34.5451
1118	40106	0	0	0	0	0	1	0	0	0	0	0	0	0	0	0.24	0	5800.86	46331.5	73188.3	92655.3	0	0	0	35.1218	45.9299	27.415
1119	40107	0	0	0	0	0	1	0	0	0	0	0	0	0	0	0.24	0	5943.9	46877.4	73536.7	93045.6	0	0	0	35.1217	45.9431	25.9263
1120	40108	0	0	0	0	0	1	0	0	0	0	0	0	0	0	0.24	0	6315.85	47447.3	73903	93449.7	0	0	0	35.1216	45.9563	21.2338
1121	40109	0	0	0	0	0	1	0	0	0	0	0	0	0	0	0.24	0	6879.68	48040.5	74286.8	93867.4	0	0	0	35.1215	45.9694	16.0687
1122	40110	0	0	0	0	1	1	0	0	0	0	0	0	0	0	0.39	0	7592.76	48656	74688	94298.5	0	0	0	35.1213	45.9826	20.165
1123	40111	0	0	0	0	1	1	0	0	0	0	0	0	0	0	0.39	0	8417.24	49293.1	75106.1	94742.8	0	0	0	35.1212	45.9958	28.5576
1124	40112	0	0	0	0	1	1	0	0	0	0	0	0	0	0	0.39	0	9323.63	49950.9	75541	95200.2	0	0	0	35.1211	46.0089	8.93294
1125	40113	0	0	0	0	1	0	0	0	0	0	0	0	0	0	0.39	0	10290.3	50628.6	75992.4	95670.5	0	0	0	35.121	46.0221	21.0703
1126	40114	0	0	0	0	0	0	0	0	0	0	0	0	0	0	0.41	0.0701	11301.8	51325.3	76460	96153.4	0	0	0	35.1209	46.0353	29.9515
1127	40115	0	0	0	0	0	0	0	0	0	0	0	0	0	0	0.41	0.0701	12347.1	52040.5	76943.4	96648.9	0	0	0	35.1208	46.0484	15.5799
1128	40116	0	0	0	0	0	1	0	0	0	0	0	0	0	0	0.41	0.0701	13416.4	52773.2	77442.4	97156.6	0	0	0	35.1207	46.0616	28.4028
1129	40117	0	0	0	0	0	0	0	0	0	0	0	0	0	0	0.41	0.0701	14499.7	53522.8	77956.7	97676.4	0	0	0	35.1206	46.0748	40.4667
1130	40118	0	0	0	0	0	1	0	0	0	0	0	0	0	0	-0.22	0.3022	15600	54288.6	78486	98208.1	0	0	0	35.1204	46.0879	0
1131	40119	0	0	0	0	0	0	0	0	0	0	0	0	0	0	-0.22	0.3022	16714.1	55069.9	79029.9	98751.6	0	0	0	35.1203	46.1011	20.4961
1132	40120	0	0	0	0	0	0	0	0	0	0	0	0	0	0	-0.22	0.3022	17831.4	55866	79588.3	99306.6	0	0	0	35.1202	46.1143	34.1341
1133	40121	0	0	0	0	0	0	0	0	0	0	0	0	0	0	-0.22	0.3022	18927.5	56676.4	80160.6	99872.9	0	0	0	35.1201	46.1274	22.4167
1134	40122	0	0	0	0	0	0	0	0	0	0	0	0	0	0	-1.2	0.5974	20024.2	57500.3	80746.8	100450	0	0	0	35.12	46.1406	34.7842
1135	40123	0	0	0	0	0	0	0	0	0	0	0	0	0	0	-1.2	0.5974	21120.6	58337.4	81346.5	101039	0	0	0	35.1198	46.1538	36.0579
1136	40124	0	0	0	0	0	0	0	0	0	0	0	0	0	0	-1.2	0.5974	22217.1	59185.9	81959.3	101638	0	0	0	35.1197	46.1669	40.1972
1137	40125	0	0	0	0	0	0	0	0	0	0	0	0	0	0	-0.49	0.4113	23313.7	60045.4	82585	102248	0	0	0	35.1196	46.1801	33.7882
1138	40126	0	0	0	0	0	0	0	0	0	0	0	0	0	0	-1.74	0.5631	24410	60916.4	83223.4	102868	0	0	0	35.1195	46.1933	46.8784
1139	40127	0	0	0	0	0	1	0	0	0	0	0	0	0	0	-1.74	0.5631	25452.7	61798.5	83874	103498	0	0	0	35.1193	46.2064	35.747
1140	40128	0	0	0	0	0	0	0	0	0	0	0	0	0	0	-1.74	0.5631	26496.8	62691.1	84536.7	104139	0	0	0	35.1192	46.2196	31.3029
1141	40129	0	0	0	0	0	0	0	0	0	0	0	0	0	0	-1.74	0.5631	27536.3	63593.8	85211.1	104789	0	0	0	35.1191	46.2328	30.9199
1142	40354	0	0	0	0	0	0	0	0	0	0	0	0	0	0	0.01	0	48120.4	48732.4	74204.4	88533.2	0	0	0	35.1138	45.4031	4.30323
1143	40355	0	0	0	0	0	0	0	0	0	0	0	0	0	0	0.01	0	46926	48068	73771.3	88291.6	0	0	0	35.1138	45.4163	8.65168
1144	40356	0	0	0	0	0	0	0	0	0	0	0	0	0	0	0.01	0	45731.9	47424.6	73355.4	88065.7	0	0	0	35.1138	45.4294	8.08194
1145	40357	0	0	0	0	0	0	0	0	0	0	0	0	0	0	0.01	0	44538.2	46803.1	72956.8	87855.6	0	0	0	35.1137	45.4426	10.4191
1146	40358	0	0	0	0	0	1	0	0	0	0	0	0	0	0	0.01	0	43344.8	46204.4	72575.8	87661.4	0	0	0	35.1137	45.4558	5.83653
1147	40359	0	0	0	0	0	0	0	0	0	0	0	0	0	0	0.01	0	42151.8	45629.5	72212.8	87483.3	0	0	0	35.1136	45.4689	7.16908
1148	40360	0	0	0	0	0	1	0	0	0	0	0	0	0	0	0.01	0	40959.1	45079.2	71868	87321.2	0	0	0	35.1136	45.4821	9.95132
1149	40361	0	0	0	0	0	1	0	0	0	0	0	0	0	0	0.01	0	39766.9	44554.3	71541.7	87175.5	0	0	0	35.1135	45.4953	5.42177
1150	40363	0	0	0	0	0	1	0	0	0	0	0	0	0	0	0.03	0	37384.1	43585	70945.4	86932.8	0	0	0	35.1134	45.5216	16.0172
1151	40364	0	0	0	0	0	0	0	0	0	0	0	0	0	0	0.03	0	36193.5	43142.2	70676	86836.2	0	0	0	35.1133	45.5348	8.72747
1152	40365	0	0	0	0	0	1	0	0	0	0	0	0	0	0	0.03	0	35003.6	42728.6	70425.9	86756	0	0	0	35.1133	45.548	38.9568
1153	40366	0	0	0	0	0	0	0	0	0	0	0	0	0	0	0.09	0.0018	33814.3	42344.9	70195.5	86692.3	0	0	0	35.1132	45.5611	38.3622
1154	40368	0	0	0	0	1	1	0	0	0	0	0	0	0	0	0.11	0	31438.4	41670.7	69794.3	86614.8	0	0	0	35.1131	45.5875	15.5636
1155	40369	0	0	0	0	1	0	1	0	0	0	0	0	0	0	0.11	0	30251.8	41381.8	69623.9	86600.9	0	0	0	35.113	45.6006	10.7579
1156	40370	0	0	0	0	0	1	1	0	0	0	0	0	0	0	0.04	0.0245	29066.3	41125.8	69473.8	86603.7	0	0	0	35.113	45.6138	9.61895
1157	40371	0	0	0	0	0	0	1	0	0	0	0	0	0	0	0.04	0.0245	27882.1	40903.4	69344.1	86623.1	0	0	0	35.1129	45.627	14.8673
1158	40372	0	0	0	0	0	1	1	0	0	0	0	0	0	0	0.04	0.0245	26699.3	40715.2	69235	86659.1	0	0	0	35.1128	45.6401	9.20137
1159	40373	0	0	0	0	0	1	1	0	0	0	0	0	0	0	0.04	0.0245	25518	40561.7	69146.6	86711.7	0	0	0	35.1127	45.6533	6.48772
1160	40374	0	0	0	0	0	0	1	0	0	0	0	0	0	0	0.02	0.03	24338.7	40443.2	69078.9	86780.9	0	0	0	35.1127	45.6665	1.60612
1161	40375	0	0	0	0	0	1	1	0	0	0	0	0	0	0	0.02	0.03	23161.4	40360	69031.9	86866.6	0	0	0	35.1126	45.6796	3.3827
1162	40376	0	0	0	0	0	0	1	0	0	0	0	0	0	0	0.02	0.03	21986.6	40312.4	69005.9	86968.7	0	0	0	35.1125	45.6928	11.1241
1163	40377	0	0	0	0	0	0	1	0	0	0	0	0	0	0	0.02	0.03	20814.7	40300.5	69000.6	87087.3	0	0	0	35.1125	45.706	25.1911
1164	40378	0	0	0	0	1	0	1	0	0	0	0	0	0	0	0.19	0	19646.1	40324.3	69016.3	87222.2	0	0	0	35.1124	45.7191	24.1003
1165	40379	0	0	0	0	1	0	1	0	0	0	0	0	0	0	0.19	0	18481.6	40383.8	69052.8	87373.5	0	0	0	35.1123	45.7323	28.5245
1166	40380	0	0	0	0	1	0	1	0	0	0	0	0	0	0	0.19	0	17322	40478.8	69110.1	87540.8	0	0	0	35.1122	45.7455	14.9825
1167	40381	0	0	0	0	1	1	0	0	0	0	0	0	0	0	0.19	0	16168.2	40609	69188.2	87724.3	0	0	0	35.1121	45.7586	5.61051
1168	40382	0	0	0	0	1	0	0	0	0	0	0	0	0	0	0.18	0	15021.7	40774.1	69287	87923.8	0	0	0	35.1121	45.7718	17.1627
1169	40384	0	0	0	0	1	0	1	0	0	0	0	0	0	0	0.18	0	12758.1	41207.4	69546.3	88370.4	0	0	0	35.1119	45.7981	7.71736
1170	40386	0	0	0	0	1	0	0	0	0	0	0	0	0	0	0.2	0	10555.1	41774.3	69887.1	88879.5	0	0	0	35.1117	45.8245	30.3034
1171	40387	0	0	0	0	1	1	0	0	0	0	0	1	0	0	0.2	0	9489.47	42106.2	70087.7	89157.2	0	0	0	35.1116	45.8376	29.7953
1172	40388	0	0	0	0	1	1	1	0	0	0	0	1	0	0	0.2	0	8459.91	42469.4	70308.3	89450.1	0	0	0	35.1115	45.8508	11.4995
1173	40389	0	0	0	0	1	1	0	0	0	0	0	1	0	0	0.2	0	7481.31	42863.2	70548.5	89758.1	0	0	0	35.1114	45.864	8.27216
1174	40390	0	0	0	0	1	1	0	0	0	0	0	1	0	0	0.21	0	6576.47	43286.6	70808.3	90081.1	0	0	0	35.1113	45.8771	3.31982
1175	40391	0	0	0	0	1	1	1	0	0	0	0	1	0	0	0.21	0	5780.14	43738.9	71087.3	90418.8	0	0	0	35.1112	45.8903	5.57274
1176	40392	0	0	0	0	1	0	0	0	0	0	0	1	0	0	0.21	0	5142.96	44219.1	71385.5	90771.1	0	0	0	35.1111	45.9035	17.1685
1177	40393	0	0	0	0	1	1	0	0	0	0	0	1	0	0	0.21	0	4729.69	44726.4	71702.5	91137.9	0	0	0	35.111	45.9166	27.9653
1178	40394	0	0	0	0	0	1	0	0	0	0	0	0	0	0	0.24	0	4601.09	45259.8	72038.1	91519	0	0	0	35.1109	45.9298	35.6235
1179	40395	0	0	0	0	0	1	0	0	0	0	0	0	0	0	0.24	0	4780.17	45818.4	72392.1	91914.1	0	0	0	35.1108	45.943	15.3508
1180	40396	0	0	0	0	0	0	0	0	0	0	0	0	0	0	0.24	0	5235.46	46401.4	72764.1	92323.1	0	0	0	35.1107	45.9561	31.049
1181	40397	0	0	0	0	0	1	0	0	0	0	0	0	0	0	0.24	0	5903.39	47007.8	73153.9	92745.9	0	0	0	35.1106	45.9693	15.514
1182	40398	0	0	0	0	1	1	0	0	0	0	0	0	0	0	0.39	0	6720.86	47636.6	73561.2	93182.2	0	0	0	35.1105	45.9825	8.44476
1183	40399	0	0	0	0	1	0	0	0	0	0	0	0	0	0	0.39	0	7640.03	48287.2	73985.7	93631.8	0	0	0	35.1104	45.9956	19.0514
1184	40400	0	0	0	0	1	0	0	0	0	0	0	0	0	0	0.39	0	8628.44	48958.5	74427.2	94094.6	0	0	0	35.1103	46.0088	23.9808
1185	40401	0	0	0	0	1	1	0	0	0	0	0	0	0	0	0.39	0	9664.88	49649.7	74885.3	94570.4	0	0	0	35.1102	46.022	19.426
1186	40402	0	0	0	0	0	0	0	0	0	0	0	0	0	0	0.41	0.0701	10733.1	50360	75359.7	95058.9	0	0	0	35.1101	46.0351	19.4686
1187	40403	0	0	0	0	0	0	0	0	0	0	0	0	0	0	0.41	0.0701	11818.6	51088.6	75850.2	95560	0	0	0	35.11	46.0483	38.58
1188	40404	0	0	0	0	1	0	0	0	0	0	0	0	0	0	0.57	0.0327	12924.4	51834.8	76356.3	96073.5	0	0	0	35.1099	46.0615	21.9368
1189	40405	0	0	0	0	1	0	0	0	0	0	0	0	0	0	0.57	0.0327	14045.6	52597.8	76877.9	96599.2	0	0	0	35.1097	46.0746	30.0347
1190	40406	0	0	0	0	0	1	0	0	0	0	0	0	0	0	0.19	0.1965	15153.9	53376.9	77414.5	97136.8	0	0	0	35.1096	46.0878	37.3852
1191	40407	0	0	0	0	0	1	0	0	0	0	0	0	0	0	0.19	0.1965	16245.9	54171.3	77966	97686.2	0	0	0	35.1095	46.101	9.93728
1192	40408	0	0	0	0	0	0	0	0	0	0	0	0	0	0	0.19	0.1965	17346.2	54980.4	78531.8	98247.2	0	0	0	35.1094	46.1141	29.2131
1193	40409	0	0	0	0	0	0	0	0	0	0	0	0	0	0	0.19	0.1965	18439.1	55803.7	79111.9	98819.6	0	0	0	35.1093	46.1273	20.3026
1194	40410	0	0	0	0	0	0	0	0	0	0	0	0	0	0	-0.49	0.4113	19538.7	56640.4	79705.8	99403.2	0	0	0	35.1091	46.1405	32.9844
1195	40411	0	0	0	0	0	0	0	0	0	0	0	0	0	0	-0.49	0.4113	20632.3	57488.9	80313.2	99997.8	0	0	0	35.109	46.1536	24.7963
1196	40412	0	0	0	0	0	0	0	0	0	0	0	0	0	0	-0.49	0.4113	21731.3	58348.7	80933.9	100603	0	0	0	35.1089	46.1668	41.2223
1197	40413	0	0	0	0	0	0	0	0	0	0	0	0	0	0	-0.49	0.4113	22775.4	59220.4	81567.5	101219	0	0	0	35.1088	46.18	32.9997
1198	40414	0	0	0	0	0	0	0	0	0	0	0	0	0	0	-1.74	0.5631	23816	60103.3	82213.7	101846	0	0	0	35.1086	46.1931	35.7332
1199	40415	0	0	0	0	0	1	0	0	0	0	0	0	0	0	-1.74	0.5631	24856.6	60997.1	82872.3	102482	0	0	0	35.1085	46.2063	0
1200	40416	0	0	0	0	0	0	0	0	0	0	0	0	0	0	-1.74	0.5631	25897.1	61901.3	83542.9	103129	0	0	0	35.1084	46.2195	37.5195
1201	40417	0	0	0	0	0	0	0	0	0	0	0	0	0	0	-1.74	0.5631	26888.1	62815.4	84225.2	103785	0	0	0	35.1082	46.2326	39.0814
1202	40642	0	0	0	0	0	1	0	0	0	0	0	0	0	0	0.01	0	48020.5	47744.8	73089.9	87359.7	0	0	0	35.103	45.403	4.82222
1203	40643	0	0	0	0	0	1	0	0	0	0	0	0	0	0	0.01	0	46823.6	47066.4	72650.2	87114.9	0	0	0	35.103	45.4162	0.168059
1204	40644	0	0	0	0	0	0	0	0	0	0	0	0	0	0	0.01	0	45626.9	46409.2	72227.8	86885.9	0	0	0	35.1029	45.4294	8.75447
1205	40645	0	0	0	0	0	0	0	0	0	0	0	0	0	0	0.01	0	44430.3	45773.9	71822.9	86672.9	0	0	0	35.1029	45.4425	10.9978
1206	40646	0	0	0	0	0	1	0	0	0	0	0	0	0	0	0.01	0	43233.9	45161.6	71435.9	86476.1	0	0	0	35.1028	45.4557	11.7787
1207	40647	0	0	0	0	0	0	0	0	0	0	0	0	0	0	0.01	0	42037.7	44573.2	71067.1	86295.5	0	0	0	35.1028	45.4689	13.3759
1208	40648	0	0	0	0	0	1	0	0	0	0	0	0	0	0	0.01	0	40841.8	44009.7	70716.7	86131.3	0	0	0	35.1027	45.482	8.17841
1209	40649	0	0	0	0	0	0	0	0	0	0	0	0	0	0	0.01	0	39646.1	43471.9	70385	85983.5	0	0	0	35.1027	45.4952	4.30029
1210	40650	0	0	0	0	0	1	0	0	0	0	0	0	0	0	0.03	0	38450.6	42961	70072.3	85852.2	0	0	0	35.1026	45.5084	12.6777
1211	40651	0	0	0	0	0	1	1	0	0	0	0	0	0	0	0.03	0	37255.5	42477.9	69778.9	85737.5	0	0	0	35.1026	45.5215	4.32124
1212	40652	0	0	0	0	0	0	1	0	0	0	0	0	0	0	0.03	0	36060.6	42023.4	69504.9	85639.5	0	0	0	35.1025	45.5347	14.6403
1213	40653	0	0	0	0	0	1	1	0	0	0	0	0	0	0	0.03	0	34866.2	41598.7	69250.6	85558.2	0	0	0	35.1025	45.5479	17.3855
1214	40654	0	0	0	0	1	1	1	0	0	0	0	0	0	0	0.11	0	33672.1	41204.5	69016.3	85493.6	0	0	0	35.1024	45.561	3.61349
1215	40655	0	0	0	0	1	1	1	0	0	0	0	0	0	0	0.11	0	32478.5	40841.8	68802.1	85445.9	0	0	0	35.1023	45.5742	4.81986
1216	40656	0	0	0	0	1	0	1	0	0	0	0	0	0	0	0.11	0	31285.3	40511.4	68608.2	85415	0	0	0	35.1023	45.5874	14.0857
1217	40657	0	0	0	0	1	0	1	0	0	0	0	0	0	0	0.11	0	30092.7	40214.1	68434.9	85400.9	0	0	0	35.1022	45.6005	29.0598
1218	40658	0	0	0	0	0	0	1	0	0	0	0	0	0	0	0.04	0.0245	28900.7	39950.6	68282.1	85403.8	0	0	0	35.1021	45.6137	13.8963
1219	40659	0	0	0	0	0	0	1	0	0	0	0	0	0	0	0.04	0.0245	27709.4	39721.7	68150.2	85423.4	0	0	0	35.1021	45.6269	49.1646
1220	40660	0	0	0	0	0	0	1	0	0	0	0	0	0	0	0.04	0.0245	26518.9	39527.8	68039.2	85459.9	0	0	0	35.102	45.64	20.2761
1221	40661	0	0	0	0	0	1	1	0	0	0	0	0	0	0	0.04	0.0245	25329.2	39369.7	67949.2	85513.3	0	0	0	35.1019	45.6532	14.951
1222	40662	0	0	0	0	0	0	1	0	0	0	0	0	0	0	0.02	0.03	24140.6	39247.5	67880.3	85583.4	0	0	0	35.1019	45.6664	5.60025
1223	40663	0	0	0	0	0	1	1	0	0	0	0	0	0	0	0.02	0.03	22953.2	39161.8	67832.5	85670.3	0	0	0	35.1018	45.6795	16.0419
1224	40664	0	0	0	0	0	0	1	0	0	0	0	0	0	0	0.02	0.03	21767.2	39112.8	67806	85773.9	0	0	0	35.1017	45.6927	6.20517
1225	40665	0	0	0	0	0	0	1	0	0	0	0	0	0	0	0.02	0.03	20582.8	39100.5	67800.7	85894.1	0	0	0	35.1016	45.7059	23.1952
1226	40666	0	0	0	0	1	1	1	0	0	0	0	0	0	0	0.19	0	19400.3	39125.1	67816.6	86030.9	0	0	0	35.1016	45.719	29.8879
1227	40668	0	0	0	0	1	1	1	0	0	0	0	0	0	0	0.19	0	17042.6	39284.2	67912.1	86353.9	0	0	0	35.1014	45.7454	26.2732
1228	40669	0	0	0	0	1	0	1	0	0	0	0	0	0	0	0.19	0	15868.5	39418.4	67991.5	86539.9	0	0	0	35.1013	45.7585	25.8872
1229	40670	0	0	0	0	1	0	1	0	0	0	0	0	0	0	0.18	0	14698.6	39588.5	68092.1	86742.1	0	0	0	35.1012	45.7717	16.0733
1230	40671	0	0	0	0	1	1	1	0	0	0	0	0	0	0	0.18	0	13534	39794.1	68213.6	86960.5	0	0	0	35.1011	45.7849	3.72915
1231	40672	0	0	0	0	1	0	1	0	0	0	0	0	0	0	0.18	0	12376.2	40034.6	68355.9	87194.7	0	0	0	35.1011	45.798	12.1181
1232	40674	0	0	0	0	1	0	0	0	0	0	0	0	0	0	0.2	0	10090.1	40617.9	68702.6	87710.7	0	0	0	35.1009	45.8244	31.3768
1233	40676	0	0	0	0	1	0	1	0	0	0	0	1	0	0	0.2	0	7872.1	41332.4	69131	88288.8	0	0	0	35.1007	45.8507	31.2031
1234	40677	0	0	0	0	1	1	0	0	0	0	0	1	0	0	0.2	0	6809.55	41736.9	69375.3	88600.9	0	0	0	35.1006	45.8639	23.8204
1235	40678	0	0	0	0	1	1	0	0	0	0	0	1	0	0	0.21	0	5800.86	42171.7	69639.4	88928.1	0	0	0	35.1005	45.877	30.1533
1236	40679	0	0	0	0	1	1	0	0	0	0	0	1	0	0	0.21	0	4879.55	42635.8	69923.2	89270.1	0	0	0	35.1004	45.8902	3.54024
1237	40681	0	0	0	0	1	0	1	0	0	0	0	1	0	0	0.21	0	3573.51	43648.3	70548.5	89998.4	0	0	0	35.1002	45.9165	15.7604
1238	40682	0	0	0	0	0	1	0	0	0	0	0	0	0	0	0.24	0	3401.47	44194.7	70889.6	90384.3	0	0	0	35.1001	45.9297	21.9154
1239	40683	0	0	0	0	0	0	0	0	0	0	0	0	0	0	0.24	0	3640.05	44766.6	71249.2	90784.4	0	0	0	35.1	45.9428	39.691
1240	40684	0	0	0	0	1	1	0	0	0	0	0	0	0	0	0.33	0	4220.19	45363.1	71627.2	91198.5	0	0	0	35.0999	45.956	28.5618
1241	40686	0	0	0	0	1	1	0	0	0	0	0	0	0	0	0.42	0	5964.06	46625.9	72436.8	92068	0	0	0	35.0997	45.9823	18.0064
1242	40687	0	0	0	0	1	1	0	0	0	0	0	0	0	0	0.42	0	6983.55	47290.3	72867.9	92523.1	0	0	0	35.0996	45.9955	17.2495
1243	40688	0	0	0	0	1	1	0	0	0	0	0	0	0	0	0.42	0	8049.84	47975.5	73316.1	92991.4	0	0	0	35.0995	46.0087	11.923
1244	40689	0	0	0	0	1	0	0	0	0	0	0	0	0	0	0.42	0	9138.93	48680.7	73781.1	93472.8	0	0	0	35.0994	46.0218	25.6021
1245	40690	0	0	0	0	1	0	0	0	0	0	0	0	0	0	0.57	0.0327	10252.8	49405	74262.6	93967	0	0	0	35.0993	46.035	25.725
1246	40691	0	0	0	0	1	0	0	0	0	0	0	0	0	0	0.57	0.0327	11371.9	50147.5	74760.2	94473.9	0	0	0	35.0992	46.0482	24.7008
1247	40692	0	0	0	0	1	0	0	0	0	0	0	0	0	0	0.57	0.0327	12477.6	50907.5	75273.7	94993.3	0	0	0	35.099	46.0613	26.5019
1248	40693	0	0	0	0	1	1	0	0	0	0	0	0	0	0	0.57	0.0327	13565	51684.1	75802.7	95524.9	0	0	0	35.0989	46.0745	20.9834
1249	40694	0	0	0	0	0	0	0	0	0	0	0	0	0	0	0.19	0.1965	14669.7	52476.8	76346.9	96068.5	0	0	0	35.0988	46.0877	36.5051
1250	40695	0	0	0	0	0	1	0	0	0	0	0	0	0	0	0.19	0.1965	15758.2	53284.6	76906	96624	0	0	0	35.0987	46.1008	14.2345
1251	40696	0	0	0	0	0	1	0	0	0	0	0	0	0	0	0.19	0.1965	16861.8	54107	77479.6	97191.1	0	0	0	35.0986	46.114	22.0992
1252	40697	0	0	0	0	0	0	0	0	0	0	0	0	0	0	0.19	0.1965	17951.3	54943.3	78067.5	97769.7	0	0	0	35.0984	46.1271	31.2498
1253	40698	0	0	0	0	0	0	0	0	0	0	0	0	0	0	-0.49	0.4113	19053.9	55791.8	78669.2	98359.5	0	0	0	35.0983	46.1403	0
1254	40699	0	0	0	0	0	0	0	0	0	0	0	0	0	0	-0.49	0.4113	20096	56652	79284.6	98960.4	0	0	0	35.0982	46.1535	0
1255	40700	0	0	0	0	0	0	0	0	0	0	0	0	0	0	-0.49	0.4113	21135.8	57524.3	79913.3	99572.1	0	0	0	35.0981	46.1666	35.3576
1256	40701	0	0	0	0	0	0	0	0	0	0	0	0	0	0	-0.49	0.4113	22177.7	58408.3	80554.9	100194	0	0	0	35.0979	46.1798	38.9637
1257	40702	0	0	0	0	0	0	0	0	0	0	0	0	0	0	-1.74	0.5631	23221.5	59303.4	81209.2	100827	0	0	0	35.0978	46.193	19.7064
1258	40703	0	0	0	0	0	0	0	0	0	0	0	0	0	0	-1.74	0.5631	24240.7	60209.1	81875.8	101470	0	0	0	35.0977	46.2061	36.0772
1259	40704	0	0	0	0	0	1	0	0	0	0	0	0	0	0	-1.74	0.5631	25216.1	61124.9	82554.5	102123	0	0	0	35.0976	46.2193	39.3077
1260	40705	0	0	0	0	0	0	0	0	0	0	0	0	0	0	-1.74	0.5631	26203.1	62050.4	83245	102786	0	0	0	35.0974	46.2325	43.5297
1261	40930	0	0	0	0	0	1	0	0	0	0	0	0	0	0	0.01	0	47950.5	46767.2	71978.1	86187	0	0	0	35.0922	45.403	6.60834
1262	40931	0	0	0	0	0	1	0	0	0	0	0	0	0	0	0.01	0	46751.8	46074.4	71531.6	85938.8	0	0	0	35.0922	45.4162	4.41947
1263	40932	0	0	0	0	0	0	0	0	0	0	0	0	0	0	0.01	0	45553.2	45402.8	71102.5	85706.7	0	0	0	35.0921	45.4293	10.512
1264	40933	0	0	0	0	0	1	0	0	0	0	0	0	0	0	0.01	0	44354.6	44753.2	70691.2	85490.8	0	0	0	35.0921	45.4425	9.2371
1265	40934	0	0	0	0	0	1	0	0	0	0	0	0	0	0	0.01	0	43156.1	44126.8	70298	85291.3	0	0	0	35.092	45.4557	3.14485
1266	40935	0	0	0	0	0	0	0	0	0	0	0	0	0	0	0.01	0	41957.7	43524.4	69923.2	85108.2	0	0	0	35.092	45.4688	3.49224
1267	40936	0	0	0	0	0	1	0	0	0	0	0	0	0	0	0.01	0	40759.4	42947.1	69567	84941.6	0	0	0	35.0919	45.482	7.80087
1268	40937	0	0	0	0	0	0	0	0	0	0	0	0	0	0	0.01	0	39561.2	42395.9	69229.8	84791.7	0	0	0	35.0919	45.4952	10.4373
1269	40938	0	0	0	0	0	1	0	0	0	0	0	0	0	0	0.03	0	38363.1	41871.8	68911.9	84658.6	0	0	0	35.0918	45.5083	9.74836
1270	40939	0	0	0	0	0	1	1	0	0	0	0	0	0	0	0.03	0	37165.2	41376	68613.5	84542.3	0	0	0	35.0917	45.5215	3.41485
1271	40940	0	0	0	0	0	0	1	0	0	0	0	0	0	0	0.03	0	35967.3	40909.3	68334.8	84442.9	0	0	0	35.0917	45.5346	4.34474
1272	40941	0	0	0	0	0	1	1	0	0	0	0	0	0	0	0.03	0	34769.7	40472.8	68076.2	84360.4	0	0	0	35.0916	45.5478	6.1951
1273	40942	0	0	0	0	1	1	1	0	0	0	0	0	0	0	0.11	0	33572.2	40067.6	67837.8	84295	0	0	0	35.0916	45.561	5.06087
1274	40943	0	0	0	0	1	1	1	0	0	0	0	0	0	0	0.11	0	32374.8	39694.5	67619.9	84246.5	0	0	0	35.0915	45.5741	10.9208
1275	40944	0	0	0	0	1	0	1	0	0	0	0	0	0	0	0.11	0	31177.7	39354.4	67422.6	84215.2	0	0	0	35.0914	45.5873	16.6213
1276	40945	0	0	0	0	1	0	1	0	0	0	0	0	0	0	0.11	0	29980.8	39048.3	67246.2	84201	0	0	0	35.0914	45.6005	30.8445
1277	40946	0	0	0	0	0	0	0	0	0	0	0	0	0	0	0.04	0.0245	28784.2	38776.9	67090.8	84203.8	0	0	0	35.0913	45.6136	14.6779
1278	40947	0	0	0	0	0	1	0	0	0	0	0	0	0	0	0.04	0.0245	27587.9	38541	66956.5	84223.8	0	0	0	35.0912	45.6268	44.8301
1279	40948	0	0	0	0	0	0	1	0	0	0	0	0	0	0	0.04	0.0245	26391.9	38341.2	66843.5	84260.8	0	0	0	35.0912	45.64	14.6831
1280	40949	0	0	0	0	0	1	0	0	0	0	0	0	0	0	0.04	0.0245	25196.2	38178.1	66751.9	84314.9	0	0	0	35.0911	45.6531	25.7019
1281	40950	0	0	0	0	0	0	0	0	0	0	0	0	0	0	0.02	0.03	24001	38052.2	66681.7	84386	0	0	0	35.091	45.6663	26.5166
1282	40951	0	0	0	0	0	0	0	0	0	0	0	0	0	0	0.02	0.03	22806.4	37963.8	66633.1	84474.1	0	0	0	35.091	45.6795	8.68931
1283	40952	0	0	0	0	0	0	0	0	0	0	0	0	0	0	0.02	0.03	21612.3	37913.2	66606.1	84579.2	0	0	0	35.0909	45.6926	21.9055
1284	40953	0	0	0	0	0	0	0	0	0	0	0	0	0	0	0.02	0.03	20418.9	37900.5	66600.7	84701.1	0	0	0	35.0908	45.7058	16.927
1285	40954	0	0	0	0	1	1	0	0	0	0	0	0	0	0	0.19	0	19226.3	37925.8	66616.9	84839.9	0	0	0	35.0907	45.7189	29.8614
1286	40955	0	0	0	0	1	1	0	0	0	0	0	0	0	0	0.19	0	18034.7	37989.1	66654.7	84995.3	0	0	0	35.0907	45.7321	27.1259
1287	40956	0	0	0	0	1	1	0	0	0	0	0	0	0	0	0.19	0	16844.3	38090	66714.1	85167.4	0	0	0	35.0906	45.7453	18.4652
1288	40957	0	0	0	0	1	1	0	0	0	0	0	0	0	0	0.19	0	15655.4	38228.4	66795	85356	0	0	0	35.0905	45.7584	7.96062
1289	40958	0	0	0	0	1	0	1	0	0	0	0	0	0	0	0.18	0	14468.2	38403.8	66897.3	85561	0	0	0	35.0904	45.7716	17.9327
1290	40959	0	0	0	0	1	0	0	0	0	0	0	0	0	0	0.18	0	13283.4	38615.7	67021	85782.3	0	0	0	35.0903	45.7848	23.0295
1291	40960	0	0	0	0	1	0	0	0	0	0	0	0	0	0	0.18	0	12101.7	38863.5	67165.8	86019.8	0	0	0	35.0902	45.7979	24.6456
1292	40961	0	0	0	0	1	1	1	0	0	0	0	0	0	0	0.18	0	10923.8	39146.5	67331.8	86273.3	0	0	0	35.0902	45.8111	8.36456
1293	40962	0	0	0	0	1	0	1	0	0	0	0	1	0	0	0.2	0	9751.41	39464	67518.7	86542.7	0	0	0	35.0901	45.8243	24.5818
1294	40963	0	0	0	0	1	0	1	0	0	0	0	0	0	0	0.34	0	8586.62	39815.2	67726.3	86827.9	0	0	0	35.09	45.8374	25.0029
1295	40964	0	0	0	0	1	1	1	0	0	0	0	0	0	0	0.34	0	7433.03	40199.1	67954.5	87128.6	0	0	0	35.0899	45.8506	9.32596
1296	40965	0	0	0	0	1	1	0	0	0	0	0	0	0	0	0.34	0	6296.82	40614.9	68203	87444.8	0	0	0	35.0898	45.8637	8.83114
1297	40966	0	0	0	0	1	0	1	0	0	0	0	0	0	0	0.33	0	5189.41	41061.5	68471.7	87776.3	0	0	0	35.0897	45.8769	7.63314
1298	40967	0	0	0	0	1	1	1	0	0	0	0	0	0	0	0.33	0	4134.01	41538.1	68760.2	88122.9	0	0	0	35.0896	45.8901	12.6693
1299	40968	0	0	0	0	1	1	1	0	0	0	0	0	0	0	0.33	0	3182.77	42043.4	69068.4	88484.4	0	0	0	35.0895	45.9032	11.6708
1300	40969	0	0	0	0	1	1	1	0	0	0	0	0	0	0	0.33	0	2459.67	42576.6	69396	88860.6	0	0	0	35.0894	45.9164	1.5047
1301	40970	0	0	0	0	1	0	0	0	0	0	0	0	0	0	0.33	0	2202.27	43136.6	69742.7	89251.3	0	0	0	35.0893	45.9296	24.817
1302	40971	0	0	0	0	1	1	1	0	0	0	0	0	0	0	0.33	0	2555.39	43722.4	70108.3	89656.5	0	0	0	35.0892	45.9427	16.2946
1303	40973	0	0	0	0	1	0	0	0	0	0	0	0	0	0	0.33	0	4304.65	44967.2	70894.6	90509	0	0	0	35.089	45.969	28.3503
1304	40974	0	0	0	0	1	0	0	0	0	0	0	0	0	0	0.42	0	5366.56	45624.2	71314.9	90956	0	0	0	35.0889	45.9822	24.2656
1305	40975	0	0	0	0	1	1	0	0	0	0	0	0	0	0	0.42	0	6462.2	46303	71752.7	91416.6	0	0	0	35.0888	45.9954	28.1824
1306	40976	0	0	0	0	1	1	0	0	0	0	0	0	0	0	0.42	0	7589.47	47002.7	72207.8	91890.6	0	0	0	35.0887	46.0085	23.7026
1307	40977	0	0	0	0	1	0	0	0	0	0	0	0	0	0	0.42	0	8692.53	47722.2	72679.9	92377.7	0	0	0	35.0886	46.0217	11.0691
1308	40978	0	0	0	0	1	0	0	0	0	0	0	0	0	0	0.57	0.0327	9794.39	48460.8	73168.6	92877.8	0	0	0	35.0885	46.0349	33.2669
1309	40979	0	0	0	0	1	1	0	0	0	0	0	0	0	0	0.57	0.0327	10885.3	49217.6	73673.7	93390.6	0	0	0	35.0883	46.048	25.1954
1310	40980	0	0	0	0	1	1	0	0	0	0	0	0	0	0	0.57	0.0327	11986.7	49991.7	74194.7	93915.9	0	0	0	35.0882	46.0612	31.3893
1311	40981	0	0	0	0	1	0	0	0	0	0	0	0	0	0	0.57	0.0327	13078.2	50782.4	74731.3	94453.6	0	0	0	35.0881	46.0743	3.98954
1312	40982	0	0	0	0	0	0	0	0	0	0	0	0	0	0	0.19	0.1965	14179.2	51588.9	75283.3	95003.4	0	0	0	35.088	46.0875	0
1313	40983	0	0	0	0	0	1	0	0	0	0	0	0	0	0	0.19	0.1965	15271.2	52410.4	75850.2	95565.1	0	0	0	35.0879	46.1007	29.694
1314	40984	0	0	0	0	0	1	0	0	0	0	0	0	0	0	0.19	0.1965	16371.9	53246.3	76431.7	96138.4	0	0	0	35.0878	46.1138	10.7813
1315	40985	0	0	0	0	0	0	0	0	0	0	0	0	0	0	0.19	0.1965	17415.2	54094.8	77027.6	96723.3	0	0	0	35.0876	46.127	49.9629
1316	40986	0	0	0	0	0	0	0	0	0	0	0	0	0	0	-0.49	0.4113	18456.4	54955.3	77637.4	97319.5	0	0	0	35.0875	46.1402	0
1317	40987	0	0	0	0	0	0	0	0	0	0	0	0	0	0	-0.49	0.4113	19500	55828.4	78260.9	97926.7	0	0	0	35.0874	46.1533	0
1318	40988	0	0	0	0	0	0	0	0	0	0	0	0	0	0	-0.49	0.4113	20542.9	56713.4	78897.7	98544.8	0	0	0	35.0873	46.1665	18.911
1319	40989	0	0	0	0	0	0	0	0	0	0	0	0	0	0	-0.49	0.4113	21574.5	57609.8	79547.5	99173.6	0	0	0	35.0871	46.1796	31.1079
1320	40990	0	0	0	0	0	0	0	0	0	0	0	0	0	0	-1.74	0.5631	22563.9	58517.1	80210	99812.8	0	0	0	35.087	46.1928	36.4083
1321	40991	0	0	0	0	0	0	0	0	0	0	0	0	0	0	-1.74	0.5631	23547.6	59434.8	80884.9	100462	0	0	0	35.0869	46.206	30.5277
1322	40992	0	0	0	0	0	0	0	0	0	0	0	0	0	0	-1.74	0.5631	24528.4	60362.3	81571.9	101122	0	0	0	35.0867	46.2191	17.3012
1323	41218	0	0	0	0	0	1	0	0	0	0	0	0	0	0	0.01	0	47910.4	45800.1	70869.2	85015.1	0	0	0	35.0814	45.4029	7.87297
1324	41219	0	0	0	0	0	0	0	0	0	0	0	0	0	0	0.01	0	46710.7	45092.5	70415.7	84763.4	0	0	0	35.0813	45.4161	7.38906
1325	41220	0	0	0	0	0	0	1	0	0	0	0	0	0	0	0.01	0	45511	44406	69979.8	84528.1	0	0	0	35.0813	45.4293	5.02464
1326	41221	0	0	0	0	0	1	1	0	0	0	0	0	0	0	0.01	0	44311.3	43741.6	69561.8	84309.2	0	0	0	35.0812	45.4424	2.27317
1327	41222	0	0	0	0	0	1	0	0	0	0	0	0	0	0	0.01	0	43111.6	43100.5	69162.2	84106.8	0	0	0	35.0812	45.4556	5.83655
1328	41223	0	0	0	0	0	0	1	0	0	0	0	0	0	0	0.01	0	41911.9	42483.5	68781.2	83921.2	0	0	0	35.0811	45.4688	9.23288
1329	41224	0	0	0	0	0	1	1	0	0	0	0	0	0	0	0.01	0	40712.3	41891.9	68419.1	83752.3	0	0	0	35.0811	45.4819	15.9856
1330	41225	0	0	0	0	0	0	1	0	0	0	0	0	0	0	0.01	0	39512.7	41326.6	68076.2	83600.2	0	0	0	35.081	45.4951	15.9261
1331	41226	0	0	0	0	0	1	1	0	0	0	0	0	0	0	0.03	0	38313.1	40788.8	67752.9	83465.2	0	0	0	35.081	45.5082	14.0902
1332	41227	0	0	0	0	0	1	1	0	0	0	0	0	0	0	0.03	0	37113.5	40279.6	67449.3	83347.2	0	0	0	35.0809	45.5214	17.2257
1333	41228	0	0	0	0	0	0	1	0	0	0	0	0	0	0	0.03	0	35913.9	39800.1	67165.8	83246.4	0	0	0	35.0809	45.5346	5.33155
1334	41229	0	0	0	0	0	0	1	0	0	0	0	0	0	0	0.03	0	34714.4	39351.4	66902.7	83162.7	0	0	0	35.0808	45.5477	9.24947
1335	41230	0	0	0	0	1	0	0	0	0	0	0	0	0	0	0.11	0	33514.9	38934.4	66660.1	83096.3	0	0	0	35.0808	45.5609	10.2406
1336	41231	0	0	0	0	1	0	0	0	0	0	0	0	0	0	0.11	0	32315.5	38550.4	66438.3	83047.2	0	0	0	35.0807	45.5741	8.11148
1337	41232	0	0	0	0	1	0	0	0	0	0	0	0	0	0	0.11	0	31116.1	38200.1	66237.5	83015.4	0	0	0	35.0806	45.5872	22.4044
1338	41233	0	0	0	0	1	0	1	0	0	0	0	0	0	0	0.11	0	29916.7	37884.7	66057.9	83001	0	0	0	35.0806	45.6004	10.2432
1339	41234	0	0	0	0	0	0	1	0	0	0	0	0	0	0	0.04	0.0245	28717.4	37604.9	65899.7	83003.9	0	0	0	35.0805	45.6135	7.89958
1340	41235	0	0	0	0	0	0	1	0	0	0	0	0	0	0	0.04	0.0245	27518.2	37361.6	65763	83024.1	0	0	0	35.0804	45.6267	10.7552
1341	41236	0	0	0	0	0	0	0	0	0	0	0	0	0	0	0.04	0.0245	26319	37155.5	65647.9	83061.7	0	0	0	35.0804	45.6399	15.5213
1342	41237	0	0	0	0	0	1	0	0	0	0	0	0	0	0	0.04	0.0245	25119.9	36987.2	65554.6	83116.5	0	0	0	35.0803	45.653	18.3846
1343	41238	0	0	0	0	0	0	0	0	0	0	0	0	0	0	0.02	0.03	23920.9	36857.2	65483.2	83188.7	0	0	0	35.0802	45.6662	13.9813
1344	41239	0	0	0	0	0	0	1	0	0	0	0	0	0	0	0.02	0.03	22722	36765.9	65433.7	83278.1	0	0	0	35.0801	45.6794	4.3256
1345	41240	0	0	0	0	0	0	1	0	0	0	0	0	0	0	0.02	0.03	21523.2	36713.6	65406.2	83384.6	0	0	0	35.0801	45.6925	6.35095
1346	41241	0	0	0	0	0	0	1	0	0	0	0	0	0	0	0.02	0.03	20324.6	36700.5	65400.7	83508.3	0	0	0	35.08	45.7057	4.42596
1347	41242	0	0	0	0	0	1	1	0	0	0	0	0	0	0	0.3	0	19126.2	36726.7	65417.2	83649	0	0	0	35.0799	45.7188	24.9771
1348	41243	0	0	0	0	0	0	1	0	0	0	0	0	0	0	0.3	0	17927.9	36792	65455.7	83806.7	0	0	0	35.0798	45.732	39.0564
1349	41244	0	0	0	0	0	0	1	0	0	0	0	0	0	0	0.3	0	16729.9	36896.2	65516.2	83981.2	0	0	0	35.0798	45.7452	20.7241
1350	41245	0	0	0	0	0	1	0	0	0	0	0	0	0	0	0.3	0	15532.2	37039	65598.6	84172.4	0	0	0	35.0797	45.7583	14.6682
1351	41246	0	0	0	0	1	0	1	0	0	0	0	0	0	0	0.34	0	14334.9	37220	65702.7	84380.3	0	0	0	35.0796	45.7715	18.2688
1352	41247	0	0	0	0	1	0	1	0	0	0	0	0	0	0	0.34	0	13138.1	37438.6	65828.6	84604.7	0	0	0	35.0795	45.7847	16.8016
1353	41248	0	0	0	0	1	1	1	0	0	0	0	0	0	0	0.34	0	11941.9	37694.2	65976.1	84845.5	0	0	0	35.0794	45.7978	15.3537
1354	41249	0	0	0	0	1	0	0	0	0	0	0	0	0	0	0.34	0	10746.6	37985.9	66145.1	85102.5	0	0	0	35.0793	45.811	28.4101
1355	41253	0	0	0	0	1	1	1	0	0	0	0	0	0	0	0.34	0	5984.15	39497.5	67031.7	86290	0	0	0	35.079	45.8636	11.2307
1356	41255	0	0	0	0	1	0	1	0	0	0	0	0	0	0	0.33	0	3640.05	40446.1	67598.6	86977	0	0	0	35.0788	45.89	24.4755
1357	41257	0	0	0	0	1	1	1	0	0	0	0	0	0	0	0.33	0	1486.61	41512	68245.2	87724.3	0	0	0	35.0786	45.9163	8.61644
1358	41258	0	0	0	0	1	0	0	0	0	0	0	0	0	0	0.33	0	1004.99	42086.2	68597.7	88120.1	0	0	0	35.0785	45.9294	15.3611
1359	41259	0	0	0	0	1	1	0	0	0	0	0	0	0	0	0.33	0	1640.12	42686.4	68969.3	88530.4	0	0	0	35.0784	45.9426	10.2007
1360	41260	0	0	0	0	1	0	0	0	0	0	0	0	0	0	0.33	0	2683.28	43311.5	69359.7	88955	0	0	0	35.0783	45.9558	43.1129
1361	41261	0	0	0	0	1	0	0	0	0	0	0	0	0	0	0.33	0	3794.73	43960.6	69768.5	89393.7	0	0	0	35.0782	45.9689	34.6291
1362	41262	0	0	0	0	1	1	0	0	0	0	0	0	0	0	0.42	0	4919.35	44632.4	70195.5	89846.3	0	0	0	35.0781	45.9821	33.5984
1363	41263	0	0	0	0	1	1	0	0	0	0	0	0	0	0	0.42	0	6016.64	45326	70640.3	90312.6	0	0	0	35.078	45.9952	35.5757
1364	41264	0	0	0	0	1	1	0	0	0	0	0	0	0	0	0.42	0	7111.26	46040.5	71102.5	90792.3	0	0	0	35.0779	46.0084	29.3825
1365	41265	0	0	0	0	1	1	0	0	0	0	0	0	0	0	0.42	0	8207.92	46774.9	71581.9	91285.3	0	0	0	35.0777	46.0216	25.9117
1366	41266	0	0	0	0	1	1	0	0	0	0	0	0	0	0	0.57	0.0327	9303.76	47528.2	72078.1	91791.3	0	0	0	35.0776	46.0347	33.1133
1367	41267	0	0	0	0	1	0	0	0	0	0	0	0	0	0	0.57	0.0327	10400	48299.6	72590.7	92310.1	0	0	0	35.0775	46.0479	28.9579
1368	41268	0	0	0	0	1	0	0	0	0	0	0	0	0	0	0.57	0.0327	11496.5	49088.2	73119.4	92841.6	0	0	0	35.0774	46.061	39.3804
1369	41270	0	0	0	0	0	0	0	0	0	0	0	0	0	0	0.19	0.1965	13689.4	50713.8	74223.8	93941.5	0	0	0	35.0772	46.0874	33.0927
1370	41271	0	0	0	0	0	0	0	0	0	0	0	0	0	0	0.19	0.1965	14735.3	51549.3	74798.7	94509.5	0	0	0	35.0771	46.1005	30.6314
1371	41272	0	0	0	0	0	0	0	0	0	0	0	0	0	0	0.19	0.1965	15778.5	52397.8	75388.4	95089.2	0	0	0	35.0769	46.1137	32.4573
1372	41273	0	0	0	0	0	1	0	0	0	0	0	0	0	0	0.19	0.1965	16823.8	53258.7	75992.4	95680.5	0	0	0	35.0768	46.1268	40.0359
1373	41274	0	0	0	0	0	0	0	0	0	0	0	0	0	0	-0.49	0.4113	17862	54132.5	76610.5	96283.1	0	0	0	35.0767	46.14	20.6185
1374	41275	0	0	0	0	0	0	0	0	0	0	0	0	0	0	-0.49	0.4113	18900.3	55018.6	77242.3	96896.9	0	0	0	35.0766	46.1532	36.5715
1375	41276	0	0	0	0	0	0	0	0	0	0	0	0	0	0	-0.49	0.4113	19916.1	55916.5	77887.4	97521.5	0	0	0	35.0764	46.1663	10.5483
1376	41277	0	0	0	0	0	0	0	0	0	0	0	0	0	0	-0.49	0.4113	20890.4	56825.4	78545.6	98156.8	0	0	0	35.0763	46.1795	24.7508
1377	41279	0	0	0	0	0	0	0	0	0	0	0	0	0	0	-0.96	0.3754	22856.9	58674.8	79899.8	99458.7	0	0	0	35.0761	46.2058	23.6915
1378	41280	0	0	0	0	0	0	0	0	0	0	0	0	0	0	-0.96	0.3754	23831.5	59614.2	80595.1	100125	0	0	0	35.0759	46.219	35.2888
1379	41281	0	0	0	0	0	1	0	0	0	0	0	0	0	0	-0.96	0.3754	24722.7	60562.8	81302.2	100801	0	0	0	35.0758	46.2321	35.0787
1380	41506	0	0	0	0	0	1	0	0	0	0	0	0	0	0	0.01	0	47900	44844.3	69763.4	83843.9	0	0	0	35.0706	45.4029	14.6351
1381	41507	0	0	0	0	0	0	0	0	0	0	0	0	0	0	0.01	0	46700	44121.3	69302.6	83588.8	0	0	0	35.0705	45.4161	5.17654
1382	41508	0	0	0	0	0	0	0	0	0	0	0	0	0	0	0.01	0	45500	43419.5	68859.6	83350.1	0	0	0	35.0705	45.4292	6.23355
1383	41509	0	0	0	0	0	1	0	0	0	0	0	0	0	0	0.01	0	44300	42739.8	68434.9	83128.1	0	0	0	35.0704	45.4424	1.57941
1384	41510	0	0	0	0	0	1	1	0	0	0	0	0	0	0	0.01	0	43100	42083.4	68028.6	82922.9	0	0	0	35.0704	45.4555	10.2789
1385	41511	0	0	0	0	0	0	1	0	0	0	0	0	0	0	0.01	0	41900	41451.3	67641.2	82734.5	0	0	0	35.0703	45.4687	4.35461
1386	41512	0	0	0	0	0	1	1	0	0	0	0	0	0	0	0.01	0	40700	40844.7	67273	82563.2	0	0	0	35.0703	45.4819	13.2816
1387	41513	0	0	0	0	0	0	1	0	0	0	0	0	0	0	0.01	0	39500	40264.8	66924.2	82409	0	0	0	35.0702	45.495	10.2351
1388	41514	0	0	0	0	0	1	1	0	0	0	0	0	0	0	0.03	0	38300	39712.6	66595.3	82272	0	0	0	35.0702	45.5082	9.75922
1389	41515	0	0	0	0	0	1	1	0	0	0	0	0	0	0	0.03	0	37100	39189.4	66286.4	82152.3	0	0	0	35.0701	45.5213	13.4074
1390	41516	0	0	0	0	0	0	1	0	0	0	0	0	0	0	0.03	0	35900	38696.4	65998	82050	0	0	0	35.0701	45.5345	9.35318
1391	41517	0	0	0	0	0	0	1	0	0	0	0	0	0	0	0.03	0	34700	38234.7	65730.1	81965.1	0	0	0	35.07	45.5477	23.8122
1392	41518	0	0	0	0	1	0	1	0	0	0	0	0	0	0	0.11	0	33500	37805.4	65483.2	81897.7	0	0	0	35.0699	45.5608	14.7736
1393	41519	0	0	0	0	1	0	1	0	0	0	0	0	0	0	0.11	0	32300	37409.8	65257.4	81847.9	0	0	0	35.0699	45.574	9.65245
1394	41520	0	0	0	0	1	0	0	0	0	0	0	0	0	0	0.11	0	31100	37048.8	65053	81815.6	0	0	0	35.0698	45.5871	13.514
1395	41521	0	0	0	0	1	0	1	0	0	0	0	0	0	0	0.09	0	29900	36723.4	64870.1	81801	0	0	0	35.0697	45.6003	10.487
1396	41523	0	0	0	0	1	0	1	0	0	0	0	0	0	0	0.18	0	27500	36183.6	64569.7	81824.4	0	0	0	35.0696	45.6266	10.9139
1397	41524	0	0	0	0	1	0	1	0	0	0	0	0	0	0	0.18	0	26300	35970.7	64452.5	81862.6	0	0	0	35.0695	45.6398	19.0492
1398	41525	0	0	0	0	1	1	1	0	0	0	0	0	0	0	0.18	0	25100	35796.8	64357.5	81918.3	0	0	0	35.0695	45.653	15.2912
1399	41526	0	0	0	0	0	0	1	0	0	0	0	0	0	0	0.25	0	23900	35662.4	64284.8	81991.5	0	0	0	35.0694	45.6661	9.90215
1400	41527	0	0	0	0	0	0	0	0	0	0	0	0	0	0	0.25	0	22700	35568.1	64234.3	82082.2	0	0	0	35.0693	45.6793	21.881
1401	41528	0	0	0	0	0	0	0	0	0	0	0	0	0	0	0.25	0	21500	35514.1	64206.3	82190.3	0	0	0	35.0693	45.6924	8.46936
1402	41529	0	0	0	0	0	0	0	0	0	0	0	0	0	0	0.25	0	20300	35500.6	64200.7	82315.7	0	0	0	35.0692	45.7056	3.59188
1403	41530	0	0	0	0	0	0	0	0	0	0	0	0	0	0	0.3	0	19100	35527.6	64217.5	82458.5	0	0	0	35.0691	45.7188	8.90449
1404	41531	0	0	0	0	0	0	0	0	0	0	0	0	0	0	0.3	0	17900	35595.1	64256.8	82618.4	0	0	0	35.069	45.7319	15.9657
1405	41532	0	0	0	0	0	0	1	0	0	0	0	0	0	0	0.3	0	16700	35702.8	64318.3	82795.4	0	0	0	35.0689	45.7451	32.2901
1406	41533	0	0	0	0	0	1	1	0	0	0	0	0	0	0	0.3	0	15500	35850.4	64402.3	82989.4	0	0	0	35.0689	45.7582	14.8979
1407	41534	0	0	0	0	1	0	1	0	0	0	0	0	0	0	0.34	0	14300	36037.3	64508.4	83200.2	0	0	0	35.0688	45.7714	24.7868
1408	41535	0	0	0	0	1	0	1	0	0	0	0	0	0	0	0.34	0	13100	36263.1	64636.6	83427.8	0	0	0	35.0687	45.7846	20.7943
1409	41536	0	0	0	0	1	1	1	0	0	0	0	0	0	0	0.34	0	11900	36526.8	64786.8	83672	0	0	0	35.0686	45.7977	35.5522
1410	41537	0	0	0	0	1	0	0	0	0	0	0	0	0	0	0.34	0	10700	36827.8	64958.8	83932.6	0	0	0	35.0685	45.8109	0
1411	41538	0	0	0	0	1	1	1	0	0	0	0	0	0	0	0.34	0	9500	37165.2	65152.5	84209.5	0	0	0	35.0684	45.824	1.5243
1412	41539	0	0	0	0	1	1	1	0	0	0	0	0	0	0	0.34	0	8300	37537.8	65367.7	84502.5	0	0	0	35.0683	45.8372	10.0957
1413	41540	0	0	0	0	1	1	0	0	0	0	0	0	0	0	0.34	0	7100	37944.8	65604	84811.6	0	0	0	35.0682	45.8504	5.50225
1414	41542	0	0	0	0	1	1	0	0	0	0	0	0	0	0	0.33	0	4700	38857.3	66139.6	85476.8	0	0	0	35.0681	45.8767	9.11479
1415	41543	0	0	0	0	1	1	1	0	0	0	0	0	0	0	0.33	0	3500	39360.5	66438.3	85832.6	0	0	0	35.068	45.8898	12.0701
1416	41544	0	0	0	0	1	0	1	0	0	0	0	0	0	0	0.33	0	2300	39893.5	66757.3	86203.7	0	0	0	35.0679	45.903	12.041
1417	41545	0	0	0	0	1	0	1	0	0	0	0	0	0	0	0.33	0	1100	40455	67096.1	86589.8	0	0	0	35.0678	45.9162	18.9105
1418	41546	0	0	0	0	1	1	1	0	0	0	0	0	0	0	0.33	0	0	41044	67454.6	86990.8	0	0	0	35.0677	45.9293	22.1073
1419	41547	0	0	0	0	1	0	0	0	0	0	0	0	0	0	0.33	0	1166.19	41659.2	67832.5	87406.4	0	0	0	35.0676	45.9425	9.02828
1420	41548	0	0	0	0	1	0	0	0	0	0	0	0	0	0	0.33	0	2236.07	42299.5	68229.4	87836.4	0	0	0	35.0675	45.9556	11.4857
1421	41549	0	0	0	0	1	1	0	0	0	0	0	0	0	0	0.33	0	3352.61	42963.8	68645	88280.7	0	0	0	35.0674	45.9688	23.9479
1422	41550	0	0	0	0	1	0	1	0	0	0	0	0	0	0	0.42	0	4428.32	43651	69078.9	88738.9	0	0	0	35.0673	45.982	23.4665
1423	41551	0	0	0	0	1	0	0	0	0	0	0	0	0	0	0.42	0	5536.24	44360	69530.8	89211	0	0	0	35.0671	45.9951	33.4491
1424	41552	0	0	0	0	1	1	0	0	0	0	0	0	0	0	0.42	0	6621.18	45089.8	70000.4	89696.6	0	0	0	35.067	46.0083	26.9154
1425	41553	0	0	0	0	1	0	0	0	0	0	0	0	0	0	0.42	0	7725.28	45839.4	70487.2	90195.6	0	0	0	35.0669	46.0214	0
1426	41554	0	0	0	0	1	0	0	0	0	0	0	0	0	0	0.57	0.0327	8814.19	46607.8	70991.1	90707.7	0	0	0	35.0668	46.0346	24.1233
1427	41555	0	0	0	0	1	0	0	0	0	0	0	0	0	0	0.57	0.0327	9916.15	47394.2	71511.5	91232.7	0	0	0	35.0667	46.0477	36.0436
1428	41556	0	0	0	0	1	1	0	0	0	0	0	0	0	0	0.57	0.0327	11007.3	48197.6	72048.1	91770.4	0	0	0	35.0666	46.0609	29.0974
1429	41557	0	0	0	0	1	0	0	0	0	0	0	0	0	0	0.57	0.0327	12056.9	49017.2	72600.6	92320.5	0	0	0	35.0665	46.0741	33.6168
1430	41558	0	0	0	0	0	0	0	0	0	0	0	0	0	0	0.31	0.1416	13102.7	49852.3	73168.6	92882.9	0	0	0	35.0664	46.0872	0
1431	41559	0	0	0	0	0	0	0	0	0	0	0	0	0	0	0.31	0.1416	14142.1	50700.8	73751.8	93457.4	0	0	0	35.0662	46.1004	29.1665
1432	41560	0	0	0	0	0	1	0	0	0	0	0	0	0	0	0.31	0.1416	15181.9	51562.1	74349.8	94043.6	0	0	0	35.0661	46.1135	22.7583
1433	41561	0	0	0	0	0	1	0	0	0	0	0	0	0	0	0.31	0.1416	16224.7	52436.7	74962.2	94641.4	0	0	0	35.066	46.1267	34.0544
1434	41562	0	0	0	0	1	0	0	0	0	0	0	0	0	0	-0.12	0.2814	17254	53324	75588.7	95250.6	0	0	0	35.0659	46.1399	38.7446
1435	41563	0	0	0	0	1	1	0	0	0	0	0	0	0	0	-0.12	0.2814	18240.9	54223.3	76228.9	95871	0	0	0	35.0657	46.153	29.9105
1436	41564	0	0	0	0	1	1	0	0	0	0	0	0	0	0	-0.12	0.2814	19221.1	55134.1	76882.6	96502.2	0	0	0	35.0656	46.1662	39.1332
1437	41565	0	0	0	0	1	0	0	0	0	0	0	0	0	0	-0.12	0.2814	20204	56055.8	77549.3	97144.2	0	0	0	35.0655	46.1793	27.0126
1438	41566	0	0	0	0	0	0	0	0	0	0	0	0	0	0	-0.96	0.3754	21181.6	56987.8	78228.7	97796.7	0	0	0	35.0654	46.1925	18.0691
1439	41567	0	0	0	0	0	0	0	0	0	0	0	0	0	0	-0.96	0.3754	22141.6	57929.7	78920.5	98459.5	0	0	0	35.0652	46.2056	21.0322
1440	41568	0	0	0	0	0	0	0	0	0	0	0	0	0	0	-0.96	0.3754	23028.9	58881	79624.4	99132.4	0	0	0	35.0651	46.2188	32.0555
1441	41569	0	0	0	0	0	0	0	0	0	0	0	0	0	0	-0.96	0.3754	23920.7	59841.2	80340.1	99815.2	0	0	0	35.065	46.232	30.0501
1442	41570	0	0	0	0	0	1	0	0	0	0	0	0	0	0	-0.96	0.3754	24816.9	60809.9	81067.2	100508	0	0	0	35.0648	46.2451	31.7777
1443	41794	0	0	0	0	0	1	1	0	0	0	0	0	0	0	0.01	0	47915	43900.5	68660.7	82673.6	0	0	0	35.0597	45.4028	2.55743
1444	41795	0	0	0	0	0	0	0	0	0	0	0	0	0	0	0.01	0	46715.4	43161.7	68192.4	82414.8	0	0	0	35.0597	45.416	2.47725
1445	41796	0	0	0	0	0	0	1	0	0	0	0	0	0	0	0.01	0	45515.8	42444	67742.2	82172.7	0	0	0	35.0596	45.4292	7.69428
1446	41797	0	0	0	0	0	1	0	0	0	0	0	0	0	0	0.01	0	44316.3	41748.4	67310.4	81947.5	0	0	0	35.0596	45.4423	10.0692
1447	41798	0	0	0	0	0	1	1	0	0	0	0	0	0	0	0.01	0	43116.7	41076.1	66897.3	81739.3	0	0	0	35.0596	45.4555	4.91176
1448	41799	0	0	0	0	0	0	1	0	0	0	0	0	0	0	0.01	0	41917.2	40428.3	66503.3	81548.3	0	0	0	35.0595	45.4686	4.2192
1449	41800	0	0	0	0	0	1	1	0	0	0	0	0	0	0	0.02	0	40717.7	39806.2	66128.7	81374.4	0	0	0	35.0594	45.4818	15.3222
1450	41801	0	0	0	0	0	0	1	0	0	0	0	0	0	0	0.02	0	39518.2	39210.8	65773.9	81218	0	0	0	35.0594	45.495	16.5848
1451	41802	0	0	0	0	0	1	1	0	0	0	0	0	0	0	0.04	0	38318.8	38643.6	65439.2	81079	0	0	0	35.0593	45.5081	10.5661
1452	41803	0	0	0	0	0	1	0	0	0	0	0	0	0	0	0.04	0	37119.4	38105.8	65124.9	80957.5	0	0	0	35.0593	45.5213	13.4992
1453	41804	0	0	0	0	0	0	1	0	0	0	0	0	0	0	0.04	0	35920.1	37598.5	64831.2	80853.7	0	0	0	35.0592	45.5344	9.4791
1454	41805	0	0	0	0	0	0	0	0	0	0	0	0	0	0	0.04	0	34720.7	37123.2	64558.6	80767.6	0	0	0	35.0592	45.5476	16.2783
1455	41807	0	0	0	0	1	0	0	0	0	0	0	0	0	0	0.09	0	32322.3	36273	64077.2	80648.6	0	0	0	35.059	45.5739	22.0381
1456	41808	0	0	0	0	1	0	1	0	0	0	0	0	0	0	0.09	0	31123.1	35900.6	63869	80615.9	0	0	0	35.059	45.5871	16.3045
1457	41809	0	0	0	0	1	0	0	0	0	0	0	0	0	0	0.09	0	29924.1	35564.7	63682.7	80601	0	0	0	35.0589	45.6002	10.7684
1458	41810	0	0	0	0	1	0	1	0	0	0	0	0	0	0	0.18	0	28725.1	35266.6	63518.6	80604	0	0	0	35.0589	45.6134	14.0536
1459	41811	0	0	0	0	1	0	0	0	0	0	0	0	0	0	0.18	0	27526.2	35007	63376.7	80624.8	0	0	0	35.0588	45.6265	14.1055
1460	41812	0	0	0	0	1	0	1	0	0	0	0	0	0	0	0.18	0	26327.4	34786.9	63257.3	80663.5	0	0	0	35.0587	45.6397	10.887
1461	41813	0	0	0	0	1	1	1	0	0	0	0	0	0	0	0.18	0	25128.7	34607.1	63160.5	80720	0	0	0	35.0587	45.6529	3.57499
1462	41814	0	0	0	0	0	0	1	0	0	0	0	0	0	0	0.25	0	23930.1	34468.1	63086.4	80794.3	0	0	0	35.0586	45.666	2.44932
1463	41815	0	0	0	0	0	0	0	0	0	0	0	0	0	0	0.25	0	22731.7	34370.5	63035	80886.3	0	0	0	35.0585	45.6792	10.5572
1464	41816	0	0	0	0	0	0	0	0	0	0	0	0	0	0	0.25	0	21533.5	34314.6	63006.4	80996	0	0	0	35.0584	45.6923	4.56306
1465	41817	0	0	0	0	0	0	0	0	0	0	0	0	0	0	0.25	0	20335.4	34300.6	63000.7	81123.4	0	0	0	35.0584	45.7055	4.94647
1466	41818	0	0	0	0	0	1	0	0	0	0	0	0	0	0	0.3	0	19137.7	34328.6	63017.9	81268.2	0	0	0	35.0583	45.7187	23.1642
1467	41819	0	0	0	0	0	0	0	0	0	0	0	0	0	0	0.3	0	17940.2	34398.4	63057.8	81430.5	0	0	0	35.0582	45.7318	15.7352
1468	41820	0	0	0	0	0	0	1	0	0	0	0	0	0	0	0.3	0	16743.1	34509.9	63120.6	81610	0	0	0	35.0581	45.745	0
1469	41821	0	0	0	0	0	1	1	0	0	0	0	0	0	0	0.3	0	15546.4	34662.5	63206.1	81806.8	0	0	0	35.058	45.7581	21.6234
1470	41822	0	0	0	0	1	0	1	0	0	0	0	0	0	0	0.34	0	14350.3	34855.8	63314.2	82020.7	0	0	0	35.058	45.7713	24.464
1471	41823	0	0	0	0	1	0	0	0	0	0	0	0	0	0	0.34	0	13154.8	35089.2	63444.9	82251.6	0	0	0	35.0579	45.7845	10.1623
1472	41824	0	0	0	0	1	1	1	0	0	0	0	0	0	0	0.34	0	11960.4	35361.7	63597.9	82499.2	0	0	0	35.0578	45.7976	16.5549
1473	41826	0	0	0	0	1	1	1	0	0	0	0	0	0	0	0.34	0	9575.49	36020.7	63970.4	83044.3	0	0	0	35.0576	45.8239	19.0177
1474	41828	0	0	0	0	1	1	0	0	0	0	0	0	0	0	0.34	0	7200.69	36824.6	64430.2	83654.8	0	0	0	35.0574	45.8502	35.8314
1475	41829	0	0	0	0	1	1	1	0	0	0	0	0	0	0	0.34	0	6020.8	37278	64692.3	83984	0	0	0	35.0573	45.8634	11.1386
1476	41830	0	0	0	0	1	1	1	0	0	0	0	0	0	0	0.33	0	4850.77	37764.1	64975.5	84329.1	0	0	0	35.0572	45.8766	13.7548
1477	41831	0	0	0	0	1	0	1	0	0	0	0	0	0	0	0.33	0	3687.82	38281.7	65279.5	84689.8	0	0	0	35.0571	45.8897	37.0038
1478	41832	0	0	0	0	1	1	0	0	0	0	0	0	0	0	0.33	0	2529.82	38829.5	65604	85065.9	0	0	0	35.057	45.9029	30.817
1479	41833	0	0	0	0	1	0	1	0	0	0	0	0	0	0	0.33	0	1431.78	39406.2	65948.8	85457.1	0	0	0	35.0569	45.916	27.62
1480	41834	0	0	0	0	1	0	1	0	0	0	0	0	0	0	0.33	0	360.555	40010.6	66313.6	85863.4	0	0	0	35.0568	45.9292	35.923
1481	41836	0	0	0	0	1	1	1	0	0	0	0	0	0	0	0.33	0	1746.42	41297.6	67101.5	86720	0	0	0	35.0566	45.9555	14.2487
1482	41837	0	0	0	0	0	0	1	0	0	0	0	0	0	0	0.55	0	2863.56	41977.7	67524	87169.9	0	0	0	35.0565	45.9687	14.0802
1483	41838	0	0	0	0	0	0	0	0	0	0	0	0	0	0	0.55	0	3939.54	42680.8	67965.1	87634	0	0	0	35.0564	45.9818	31.5554
1484	41839	0	0	0	0	0	1	0	0	0	0	0	0	0	0	0.52	0	5053.71	43405.6	68424.3	88112	0	0	0	35.0563	45.995	38.4891
1485	41840	0	0	0	0	0	0	0	0	0	0	0	0	0	0	0.52	0	6132.7	44151.2	68901.5	88603.6	0	0	0	35.0562	46.0081	32.9366
1486	41841	0	0	0	0	0	1	0	0	0	0	0	0	0	0	0.52	0	7245	44916.5	69396	89108.7	0	0	0	35.0561	46.0213	21.2206
1487	41842	0	0	0	0	0	1	0	0	0	0	0	0	0	0	0.52	0	8325.86	45700.4	69907.7	89627	0	0	0	35.056	46.0345	30.598
1488	41843	0	0	0	0	1	1	0	0	0	0	0	0	0	0	0.59	0.0255	9381.36	46502.2	70436.1	90158.3	0	0	0	35.0559	46.0476	0
1489	41844	0	0	0	0	1	0	0	0	0	0	0	0	0	0	0.59	0.0255	10423.5	47320.7	70980.9	90702.4	0	0	0	35.0558	46.0608	35.9088
1490	41846	0	0	0	0	1	0	0	0	0	0	0	0	0	0	0.59	0.0255	12503.2	49003.8	72118	91827.9	0	0	0	35.0555	46.0871	24.3936
1491	41847	0	0	0	0	0	1	0	0	0	0	0	0	0	0	0.31	0.1416	13548.4	49865.5	72709.6	92408.9	0	0	0	35.0554	46.1002	38.8914
1492	41848	0	0	0	0	0	0	0	0	0	0	0	0	0	0	0.31	0.1416	14577.4	50741	73316.1	93001.7	0	0	0	35.0553	46.1134	28.8227
1493	41849	0	0	0	0	0	1	0	0	0	0	0	0	0	0	0.31	0.1416	15590.1	51629.5	73937.1	93606.2	0	0	0	35.0552	46.1266	25.1469
1494	41850	0	0	0	0	0	1	0	0	0	0	0	0	0	0	0.31	0.1416	16565.3	52530.5	74572.2	94222.1	0	0	0	35.0551	46.1397	43.4004
1495	41851	0	0	0	0	1	1	0	0	0	0	0	0	0	0	-0.12	0.2814	17557.1	53443.1	75221.1	94849.1	0	0	0	35.0549	46.1529	18.6015
1496	41852	0	0	0	0	1	0	0	0	0	0	0	0	0	0	-0.12	0.2814	18531.1	54367	75883.4	95487.2	0	0	0	35.0548	46.166	34.2146
1497	41853	0	0	0	0	1	0	0	0	0	0	0	0	0	0	-0.12	0.2814	19506.4	55301.4	76558.8	96135.9	0	0	0	35.0547	46.1792	46.9534
1498	41854	0	0	0	0	1	0	0	0	0	0	0	0	0	0	-0.12	0.2814	20445.3	56246	77246.9	96795.3	0	0	0	35.0545	46.1923	20.835
1499	41855	0	0	0	0	0	0	0	0	0	0	0	0	0	0	-0.96	0.3754	21335.7	57200.1	77947.5	97464.9	0	0	0	35.0544	46.2055	24.3384
1500	41856	0	0	0	0	0	0	0	0	0	0	0	0	0	0	-0.96	0.3754	22225.2	58163.3	78660.1	98144.6	0	0	0	35.0543	46.2186	38.6573
1501	41857	0	0	0	0	0	1	0	0	0	0	0	0	0	0	-0.96	0.3754	23124.9	59135.2	79384.4	98834.2	0	0	0	35.0542	46.2318	23.8093
1502	41858	0	0	0	0	0	0	0	0	0	0	0	0	0	0	-0.96	0.3754	24016.9	60115.3	80120.2	99533.5	0	0	0	35.054	46.245	26.4639
1503	42082	0	0	0	0	0	1	0	0	0	0	0	0	0	0	0.01	0	47960.1	42969.4	67561.3	81504.1	0	0	0	35.0489	45.4028	11.1714
1504	42083	0	0	0	0	0	1	0	0	0	0	0	0	0	0	0.01	0	46761.6	42214.3	67085.4	81241.6	0	0	0	35.0489	45.4159	3.72966
1505	42084	0	0	0	0	0	0	1	0	0	0	0	0	0	0	0.01	0	45563.3	41480.2	66627.7	80996	0	0	0	35.0488	45.4291	5.67653
1506	42085	0	0	0	0	0	1	0	0	0	0	0	0	0	0	0.01	0	44365	40768.2	66188.6	80767.6	0	0	0	35.0488	45.4423	0.883501
1507	42086	0	0	0	0	0	1	1	0	0	0	0	0	0	0	0.02	0	43166.8	40079.5	65768.5	80556.3	0	0	0	35.0487	45.4554	2.13737
1508	42087	0	0	0	0	0	0	1	0	0	0	0	0	0	0	0.02	0	41968.7	39415.4	65367.7	80362.4	0	0	0	35.0487	45.4686	9.47085
1509	42088	0	0	0	0	0	1	0	0	0	0	0	0	0	0	0.02	0	40770.7	38776.9	64986.5	80186	0	0	0	35.0486	45.4817	11.168
1510	42089	0	0	0	0	0	0	0	0	0	0	0	0	0	0	0.02	0	39572.8	38165.6	64625.5	80027.2	0	0	0	35.0486	45.4949	11.4207
1511	42090	0	0	0	0	0	1	1	0	0	0	0	0	0	0	0.04	0	38375.1	37582.6	64284.8	79886.2	0	0	0	35.0485	45.508	6.64422
1512	42091	0	0	0	0	0	1	0	0	0	0	0	0	0	0	0.04	0	37177.5	37029.3	63964.8	79762.9	0	0	0	35.0485	45.5212	5.03539
1513	42092	0	0	0	0	0	0	1	0	0	0	0	0	0	0	0.04	0	35980.1	36507.1	63665.8	79657.5	0	0	0	35.0484	45.5344	15.3693
1514	42093	0	0	0	0	0	1	1	0	0	0	0	0	0	0	0.04	0	34782.9	36017.4	63388.1	79570.1	0	0	0	35.0484	45.5475	10.0104
1515	42094	0	0	0	0	1	1	0	0	0	0	0	0	0	0	0.09	0	33585.9	35561.4	63132	79500.7	0	0	0	35.0483	45.5607	11.2812
1516	42095	0	0	0	0	1	1	0	0	0	0	0	0	0	0	0.09	0	32389	35140.4	62897.8	79449.4	0	0	0	35.0482	45.5738	23.8614
1517	42096	0	0	0	0	1	0	1	0	0	0	0	0	0	0	0.09	0	31192.5	34755.9	62685.6	79416.1	0	0	0	35.0482	45.587	16.4844
1518	42097	0	0	0	0	1	0	0	0	0	0	0	0	0	0	0.09	0	29996.2	34408.9	62495.8	79401	0	0	0	35.0481	45.6001	9.97968
1519	42098	0	0	0	0	1	0	1	0	0	0	0	0	0	0	0.18	0	28800.2	34100.6	62328.6	79404	0	0	0	35.048	45.6133	13.3605
1520	42099	0	0	0	0	1	0	0	0	0	0	0	0	0	0	0.18	0	27604.5	33832.1	62184	79425.2	0	0	0	35.048	45.6265	13.507
1521	42100	0	0	0	0	1	0	1	0	0	0	0	0	0	0	0.18	0	26409.3	33604.3	62062.3	79464.5	0	0	0	35.0479	45.6396	0.377144
1522	42101	0	0	0	0	1	1	1	0	0	0	0	0	0	0	0.18	0	25214.5	33418.1	61963.6	79521.8	0	0	0	35.0478	45.6528	6.86256
1523	42102	0	0	0	0	0	0	0	0	0	0	0	0	0	0	0.25	0	24020.2	33274.2	61888	79597.2	0	0	0	35.0478	45.6659	1.0384
1524	42103	0	0	0	0	0	0	0	0	0	0	0	0	0	0	0.25	0	22826.5	33173	61835.7	79690.6	0	0	0	35.0477	45.6791	3.3292
1525	42104	0	0	0	0	0	0	0	0	0	0	0	0	0	0	0.25	0	21633.5	33115.1	61806.6	79802	0	0	0	35.0476	45.6923	3.14807
1526	42105	0	0	0	0	0	0	0	0	0	0	0	0	0	0	0.25	0	20441.4	33100.6	61800.7	79931.2	0	0	0	35.0475	45.7054	13.2646
1527	42106	0	0	0	0	0	1	0	0	0	0	0	0	0	0	0.25	0	19250.2	33129.6	61818.2	80078.2	0	0	0	35.0475	45.7186	9.99751
1528	42107	0	0	0	0	0	0	0	0	0	0	0	0	0	0	0.3	0	18060.2	33202	61859	80242.9	0	0	0	35.0474	45.7317	24.7577
1529	42108	0	0	0	0	0	1	0	0	0	0	0	0	0	0	0.3	0	16871.6	33317.4	61922.9	80425.1	0	0	0	35.0473	45.7449	38.265
1530	42109	0	0	0	0	0	1	1	0	0	0	0	0	0	0	0.3	0	15684.7	33475.5	62010.1	80624.8	0	0	0	35.0472	45.758	10.9154
1531	42110	0	0	0	0	0	0	0	0	0	0	0	0	0	0	0.3	0	14500	33675.7	62120.3	80841.8	0	0	0	35.0471	45.7712	24.2261
1532	42111	0	0	0	0	1	1	0	0	0	0	0	0	0	0	0.34	0	13318	33917.1	62253.4	81076	0	0	0	35.0471	45.7843	7.9199
1533	42113	0	0	0	0	1	1	0	0	0	0	0	0	0	0	0.34	0	10965.9	34520.3	62587.9	81595.3	0	0	0	35.0469	45.8107	7.12705
1534	42114	0	0	0	0	1	0	1	0	0	0	0	0	0	0	0.34	0	9798.47	34879.9	62788.9	81880.2	0	0	0	35.0468	45.8238	9.63594
1535	42115	0	0	0	0	1	0	1	0	0	0	0	0	0	0	0.34	0	8634.81	35276.8	63012.1	82181.5	0	0	0	35.0467	45.837	21.1842
1536	42116	0	0	0	0	1	1	1	0	0	0	1	1	0	0	0.96	0	7472.62	35709.5	63257.3	82499.2	0	0	0	35.0466	45.8501	1.55314
1537	42117	0	0	0	0	1	1	1	0	0	0	1	1	0	0	0.96	0	6324.56	36176.9	63524.2	82833.1	0	0	0	35.0465	45.8633	24.5737
1538	42118	0	0	0	0	1	0	1	0	0	0	1	0	0	0	0.96	0	5200	36677.6	63812.6	83182.9	0	0	0	35.0464	45.8764	44.2397
1539	42119	0	0	0	0	1	1	1	0	0	0	1	0	0	0	0.72	0	4114.61	37210.3	64122.1	83548.5	0	0	0	35.0463	45.8896	39.3926
1540	42121	0	0	0	0	1	1	1	0	0	0	1	0	0	0	0.72	0	1923.54	38366.3	64803.5	84326.3	0	0	0	35.0461	45.9159	25.3869
1541	42123	0	0	0	0	0	0	1	0	0	0	0	0	0	0	0.55	0	200	39633.9	65565.6	85164.5	0	0	0	35.0459	45.9422	28.5778
1542	42124	0	0	0	0	0	0	1	0	0	0	0	0	0	0	0.55	0	1264.91	40306.4	65976.1	85605.8	0	0	0	35.0458	45.9554	19.8269
1543	42125	0	0	0	0	0	0	1	0	0	0	0	0	0	0	0.55	0	2370.65	41003	66405.8	86061.6	0	0	0	35.0457	45.9685	3.18284
1544	42126	0	0	0	0	0	1	0	0	0	0	0	0	0	0	0.55	0	3453.98	41722.5	66854.2	86531.6	0	0	0	35.0456	45.9817	27.1396
1545	42128	0	0	0	0	0	0	0	0	0	0	0	0	0	0	0.52	0	5646.24	43225.6	67806	87513.4	0	0	0	35.0454	46.008	30.8225
1546	42129	0	0	0	0	0	1	0	0	0	0	0	0	0	0	0.52	0	6708.2	44006.9	68308.5	88024.8	0	0	0	35.0453	46.0212	31.844
1547	42130	0	0	0	0	0	0	0	0	0	0	0	0	0	0	0.52	0	7741.45	44806.8	68828.3	88549.4	0	0	0	35.0452	46.0343	28.86
1548	42131	0	0	0	0	1	0	0	0	0	0	0	0	0	0	0.59	0.0255	8781.8	45624.2	69364.9	89087.1	0	0	0	35.0451	46.0475	33.8074
1549	42132	0	0	0	0	1	0	0	0	0	0	0	0	0	0	0.59	0.0255	9827	46458.3	69918	89637.7	0	0	0	35.045	46.0606	38.3477
1550	42133	0	0	0	0	1	1	0	0	0	0	0	0	0	0	0.59	0.0255	10870.6	47306.8	70487.2	90200.9	0	0	0	35.0448	46.0738	25.2143
1551	42134	0	0	0	0	1	1	0	0	0	0	0	0	0	0	0.59	0.0255	11903.8	48169	71072.1	90776.4	0	0	0	35.0447	46.0869	13.2052
1552	42135	0	0	0	0	0	0	0	0	0	0	0	0	0	0	0.31	0.1416	12937.5	49045.4	71672.4	91364.1	0	0	0	35.0446	46.1001	15.3689
1553	42136	0	0	0	0	0	0	0	0	0	0	0	0	0	0	0.31	0.1416	13920.1	49935.3	72287.6	91963.7	0	0	0	35.0445	46.1132	32.9471
1554	42137	0	0	0	0	0	0	0	0	0	0	0	0	0	0	0.31	0.1416	14894.6	50837.9	72917.3	92574.9	0	0	0	35.0444	46.1264	20.4917
1555	42138	0	0	0	0	0	0	0	0	0	0	0	0	0	0	0.31	0.1416	15880.8	51752.6	73561.2	93197.6	0	0	0	35.0442	46.1396	42.7533
1556	42139	0	0	0	0	1	1	0	0	0	0	0	0	0	0	-0.12	0.2814	16860	52678.7	74218.9	93831.6	0	0	0	35.0441	46.1527	32.7933
1557	42140	0	0	0	0	1	0	0	0	0	0	0	0	0	0	-0.12	0.2814	17835.4	53615.8	74890.1	94476.5	0	0	0	35.044	46.1659	34.813
1558	42141	0	0	0	0	1	0	0	0	0	0	0	0	0	0	-0.12	0.2814	18749.1	54563.1	75574.4	95132.1	0	0	0	35.0439	46.179	33.8097
1559	42142	0	0	0	0	1	0	0	0	0	0	0	0	0	0	-0.12	0.2814	19643.1	55520.2	76271.4	95798.3	0	0	0	35.0437	46.1922	35.0292
1560	42143	0	0	0	0	0	0	0	0	0	0	0	0	0	0	-0.96	0.3754	20530	56486.5	76980.8	96474.9	0	0	0	35.0436	46.2053	10.6032
1561	42144	0	0	0	0	0	0	0	0	0	0	0	0	0	0	-0.96	0.3754	21433.6	57461.7	77702.3	97161.5	0	0	0	35.0435	46.2185	15.3037
1562	42145	0	0	0	0	0	0	0	0	0	0	0	0	0	0	-0.96	0.3754	22323.3	58445.3	78435.5	97858.1	0	0	0	35.0433	46.2316	27.5132
1563	42146	0	0	0	0	0	0	0	0	0	0	0	0	0	0	-0.96	0.3754	23239.8	59436.8	79180.1	98564.3	0	0	0	35.0432	46.2448	33.204
1564	42370	0	0	0	0	0	1	1	0	0	0	0	0	0	0	0.01	0	48035.1	42052	66465.4	80335.5	0	0	0	35.0381	45.4027	5.34876
1565	42371	0	0	0	0	0	1	1	0	0	0	0	0	0	0	0.01	0	46838.6	41280.1	65981.6	80069.2	0	0	0	35.0381	45.4159	2.16843
1566	42372	0	0	0	0	0	0	0	0	0	0	0	0	0	0	0.01	0	45642.2	40529.1	65516.2	79820	0	0	0	35.038	45.429	8.40201
1567	42373	0	0	0	0	0	0	1	0	0	0	0	0	0	0	0.01	0	44446	39800.1	65069.6	79588.2	0	0	0	35.038	45.4422	2.89644
1568	42374	0	0	0	0	0	1	1	0	0	0	0	0	0	0	0.02	0	43250.1	39094.4	64642.2	79373.8	0	0	0	35.0379	45.4554	7.97337
1569	42375	0	0	0	0	0	0	1	0	0	0	0	0	0	0	0.02	0	42054.4	38413.1	64234.3	79177	0	0	0	35.0379	45.4685	7.09355
1570	42376	0	0	0	0	0	1	1	0	0	0	0	0	0	0	0.02	0	40858.9	37757.8	63846.5	78998	0	0	0	35.0378	45.4817	7.80473
1571	42377	0	0	0	0	0	0	0	0	0	0	0	0	0	0	0.02	0	39663.7	37129.6	63478.9	78836.8	0	0	0	35.0378	45.4948	10.75
1572	42378	0	0	0	0	0	1	1	0	0	0	0	0	0	0	0.02	0	38468.8	36530.1	63132	78693.6	0	0	0	35.0377	45.508	7.10803
1573	42379	0	0	0	0	0	1	1	0	0	0	0	0	0	0	0.04	0	37274.3	35960.7	62806.1	78568.4	0	0	0	35.0376	45.5211	4.73301
1574	42380	0	0	0	0	0	0	0	0	0	0	0	0	0	0	0.04	0	36080.1	35422.7	62501.6	78461.5	0	0	0	35.0376	45.5343	6.04446
1575	42381	0	0	0	0	0	1	1	0	0	0	0	0	0	0	0.04	0	34886.2	34917.8	62218.7	78372.7	0	0	0	35.0375	45.5474	6.76801
1576	42382	0	0	0	0	0	1	0	0	0	0	0	0	0	0	0.04	0	33692.9	34447.2	61957.8	78302.2	0	0	0	35.0375	45.5606	11.24
1577	42383	0	0	0	0	1	1	1	0	0	0	0	0	0	0	0.09	0	32500	34012.5	61719.1	78250.1	0	0	0	35.0374	45.5738	11.8857
1578	42384	0	0	0	0	1	1	0	0	0	0	0	0	0	0	0.09	0	31307.7	33615	61502.9	78216.4	0	0	0	35.0373	45.5869	4.73987
1579	42385	0	0	0	0	1	0	0	0	0	0	0	0	0	0	0.09	0	30115.9	33256.1	61309.5	78201	0	0	0	35.0373	45.6001	11.1363
1580	42386	0	0	0	0	1	0	0	0	0	0	0	0	0	0	0.09	0	28924.9	32937.1	61138.9	78204.1	0	0	0	35.0372	45.6132	6.41208
1581	42387	0	0	0	0	1	0	1	0	0	0	0	0	0	0	0.18	0	27734.6	32659	60991.6	78225.6	0	0	0	35.0371	45.6264	8.46509
1582	42388	0	0	0	0	1	1	1	0	0	0	0	0	0	0	0.18	0	26545.2	32423	60867.5	78265.4	0	0	0	35.0371	45.6395	7.26509
1583	42389	0	0	0	0	1	1	0	0	0	0	0	0	0	0	0.18	0	25356.9	32230	60766.8	78323.7	0	0	0	35.037	45.6527	10.5234
1584	42390	0	0	0	0	1	0	1	0	0	0	0	0	0	0	0.18	0	24169.6	32080.7	60689.8	78400.3	0	0	0	35.0369	45.6658	2.94824
1585	42391	0	0	0	0	0	0	0	0	0	0	0	0	0	0	0.25	0	22983.7	31975.8	60636.4	78495.1	0	0	0	35.0369	45.679	8.45799
1586	42392	0	0	0	0	0	0	0	0	0	0	0	0	0	0	0.25	0	21799.3	31915.7	60606.7	78608.1	0	0	0	35.0368	45.6922	3.50213
1587	42393	0	0	0	0	0	0	0	0	0	0	0	0	0	0	0.25	0	20616.7	31900.6	60600.7	78739.3	0	0	0	35.0367	45.7053	4.09066
1588	42394	0	0	0	0	0	1	0	0	0	0	0	0	0	0	0.25	0	19436.3	31930.7	60618.6	78888.5	0	0	0	35.0366	45.7185	9.5331
1589	42395	0	0	0	0	0	1	0	0	0	0	0	0	0	0	0.3	0	18258.4	32005.8	60660.1	79055.7	0	0	0	35.0366	45.7316	13.8234
1590	42396	0	0	0	0	1	1	0	0	0	0	1	1	0	0	0.94	0.006	17083.6	32125.5	60725.4	79240.6	0	0	0	35.0365	45.7448	17.7637
1591	42397	0	0	0	0	1	1	1	0	0	0	1	1	0	0	0.94	0.006	15912.6	32289.5	60814.2	79443.3	0	0	0	35.0364	45.7579	28.1794
1592	42398	0	0	0	0	1	0	1	0	0	0	1	1	0	0	0.94	0.006	14746.2	32496.9	60926.6	79663.5	0	0	0	35.0363	45.7711	22.3088
1593	42399	0	0	0	0	1	1	0	0	0	0	1	1	0	0	1.1	0	13582.3	32747.1	61062.3	79901.2	0	0	0	35.0362	45.7842	14.2164
1594	42400	0	0	0	0	1	0	0	0	0	0	1	1	0	0	1.1	0	12419.3	33038.9	61221.3	80156.1	0	0	0	35.0361	45.7974	10.4401
1595	42401	0	0	0	0	1	0	0	0	0	0	1	1	0	0	1.1	0	11264.1	33371.4	61403.3	80428.1	0	0	0	35.0361	45.8106	15.4066
1596	42402	0	0	0	0	1	0	0	0	0	0	1	1	0	0	1.1	0	10119.3	33743.3	61608.2	80717	0	0	0	35.036	45.8237	11.3477
1597	42403	0	0	0	0	1	1	1	0	0	0	1	1	0	0	0.96	0	8988.88	34153.3	61835.7	81022.7	0	0	0	35.0359	45.8369	5.11681
1598	42404	0	0	0	0	1	0	1	0	0	0	1	1	0	0	0.96	0	7879.09	34600.1	62085.5	81344.9	0	0	0	35.0358	45.85	6.57911
1599	42405	0	0	0	0	1	1	0	0	0	0	1	1	0	0	0.96	0	6797.79	35082.3	62357.4	81683.5	0	0	0	35.0357	45.8632	9.19101
1600	42406	0	0	0	0	1	0	0	0	0	0	1	1	0	0	0.96	0	5685.95	35598.5	62651.2	82038.3	0	0	0	35.0356	45.8763	6.77384
1601	42407	0	0	0	0	1	1	1	0	0	0	1	1	0	0	0.72	0	4606.52	36147.1	62966.4	82409	0	0	0	35.0355	45.8895	39.6499
1602	42408	0	0	0	0	1	1	1	0	0	0	1	0	0	0	0.72	0	3492.85	36726.7	63302.8	82795.4	0	0	0	35.0354	45.9026	40.052
1603	42409	0	0	0	0	1	1	1	0	0	0	1	0	0	0	0.72	0	2416.61	37335.9	63660.1	83197.4	0	0	0	35.0353	45.9158	43.7698
1604	42410	0	0	0	0	1	0	0	0	0	0	1	0	0	0	0.72	0	1300	37973.3	64037.9	83614.6	0	0	0	35.0352	45.9289	37.0399
1605	42411	0	0	0	0	0	0	1	0	0	0	0	0	0	0	0.55	0	223.607	38637.4	64435.8	84046.9	0	0	0	35.0351	45.9421	42.2493
1606	42412	0	0	0	0	0	0	1	0	0	0	0	0	0	0	0.55	0	806.226	39327	64853.4	84494	0	0	0	35.035	45.9553	44.0731
1607	42414	0	0	0	0	0	1	1	0	0	0	0	0	0	0	0.55	0	2973.21	40777.1	65746.6	85431.8	0	0	0	35.0348	45.9816	35.5598
1608	42415	0	0	0	0	0	1	1	0	0	0	0	0	0	0	0.52	0	4024.92	41535.2	66221.2	85922.1	0	0	0	35.0347	45.9947	19.4615
1609	42416	0	0	0	0	0	1	0	0	0	0	0	0	0	0	0.52	0	5060.63	42313.7	66714.1	86426.2	0	0	0	35.0346	46.0079	24.1624
1610	42417	0	0	0	0	0	1	0	0	0	0	0	0	0	0	0.52	0	6105.73	43111.6	67224.8	86943.9	0	0	0	35.0345	46.021	28.6274
1611	42418	0	0	0	0	0	1	1	0	0	0	0	0	0	0	0.52	0	7155.42	43927.8	67752.9	87475	0	0	0	35.0344	46.0342	35.9849
1612	42419	0	0	0	0	1	1	0	0	0	0	0	0	0	0	0.59	0.0255	8188.41	44761.3	68298	88019.3	0	0	0	35.0342	46.0473	33.9478
1613	42420	0	0	0	0	1	0	0	0	0	0	0	0	0	0	0.59	0.0255	9228.22	45609.8	68859.6	88576.5	0	0	0	35.0341	46.0605	33.2357
1614	42421	0	0	0	0	1	0	0	0	0	0	0	0	0	0	0.59	0.0255	10257.7	46472.5	69437.5	89146.4	0	0	0	35.034	46.0736	36.613
1615	42422	0	0	0	0	1	0	0	0	0	0	0	0	0	0	0.59	0.0255	11264.5	47349.9	70031.2	89728.7	0	0	0	35.0339	46.0868	33.5654
1616	42423	0	0	0	0	0	0	0	0	0	0	0	0	0	0	0.31	0.1416	12241.3	48241.2	70640.3	90323.2	0	0	0	35.0338	46.0999	23.2352
1617	42424	0	0	0	0	0	0	0	0	0	0	0	0	0	0	0.31	0.1416	13230.6	49145.6	71264.4	90929.6	0	0	0	35.0337	46.1131	26.5332
1618	42425	0	0	0	0	0	0	0	0	0	0	0	0	0	0	0.31	0.1416	14205.6	50062.5	71903.1	91547.8	0	0	0	35.0335	46.1263	34.6997
1619	42426	0	0	0	0	0	1	0	0	0	0	0	0	0	0	0.31	0.1416	15182.2	50991.1	72556	92177.4	0	0	0	35.0334	46.1394	15.3462
1620	42427	0	0	0	0	1	1	0	0	0	0	0	0	0	0	-0.12	0.2814	16161.7	51930.8	73222.7	92818.3	0	0	0	35.0333	46.1526	11.6743
1621	42428	0	0	0	0	1	1	0	0	0	0	0	0	0	0	-0.12	0.2814	17053.2	52881.1	73903	93470.2	0	0	0	35.0332	46.1657	23.7238
1622	42429	0	0	0	0	1	0	0	0	0	0	0	0	0	0	-0.12	0.2814	17951.3	53841.3	74596.3	94132.9	0	0	0	35.033	46.1789	27.8463
1623	42430	0	0	0	0	1	0	0	0	0	0	0	0	0	0	-0.12	0.2814	18835.1	54811	75302.4	94806.1	0	0	0	35.0329	46.192	28.452
1624	42431	0	0	0	0	0	0	0	0	0	0	0	0	0	0	-0.96	0.3754	19738.5	55789.7	76020.9	95489.7	0	0	0	35.0328	46.2052	39.1991
1625	42432	0	0	0	0	0	0	0	0	0	0	0	0	0	0	-0.96	0.3754	20630.3	56776.8	76751.4	96183.4	0	0	0	35.0326	46.2183	21.6396
1626	42433	0	0	0	0	0	0	0	0	0	0	0	0	0	0	-0.62	0.2821	21552	57772.1	77493.5	96886.9	0	0	0	35.0325	46.2315	34.6468
1627	42434	0	0	0	0	0	0	0	0	0	0	0	0	0	0	-0.62	0.2821	22500	58774.9	78247.1	97600.2	0	0	0	35.0324	46.2446	28.1663
1628	42659	0	0	0	0	0	0	1	0	0	0	0	0	0	0	0.01	0	46946	40360	64881.2	78897.7	0	0	0	35.0272	45.4158	11.1199
1629	42660	0	0	0	0	0	0	1	0	0	0	0	0	0	0	0.01	0	45752.5	39591.5	64407.8	78644.8	0	0	0	35.0272	45.429	2.63976
1630	42661	0	0	0	0	0	0	0	0	0	0	0	0	0	0	0.01	0	44559.3	38844.9	63953.5	78409.4	0	0	0	35.0271	45.4421	2.21764
1631	42662	0	0	0	0	0	1	0	0	0	0	0	0	0	0	0.01	0	43366.5	38121.5	63518.6	78191.8	0	0	0	35.0271	45.4553	2.08772
1632	42663	0	0	0	0	0	0	1	0	0	0	0	0	0	0	0.02	0	42174	37422.6	63103.5	77992.1	0	0	0	35.027	45.4684	8.70007
1633	42664	0	0	0	0	0	1	1	0	0	0	0	0	0	0	0.02	0	40982.1	36749.6	62708.6	77810.3	0	0	0	35.027	45.4816	6.54259
1634	42665	0	0	0	0	0	1	1	0	0	0	0	0	0	0	0.02	0	39790.6	36103.9	62334.3	77646.6	0	0	0	35.0269	45.4948	8.35455
1635	42666	0	0	0	0	0	0	0	0	0	0	0	0	0	0	0.02	0	38599.6	35487	61981	77501.2	0	0	0	35.0269	45.5079	3.34879
1636	42667	0	0	0	0	0	1	1	0	0	0	0	0	0	0	0.04	0	37409.2	34900.6	61649.1	77374.2	0	0	0	35.0268	45.5211	10.6586
1637	42668	0	0	0	0	0	0	0	0	0	0	0	0	0	0	0.04	0	36219.5	34346	61338.8	77265.5	0	0	0	35.0268	45.5342	7.86767
1638	42669	0	0	0	0	0	1	0	0	0	0	0	0	0	0	0.04	0	35030.4	33825	61050.6	77175.4	0	0	0	35.0267	45.5474	10.8341
1639	42670	0	0	0	0	0	0	0	0	0	0	0	0	0	0	0.04	0	33842.1	33339	60784.6	77103.8	0	0	0	35.0266	45.5605	6.24789
1640	42671	0	0	0	0	1	1	0	0	0	0	0	0	0	0	0.09	0	32654.7	32889.7	60541.3	77050.9	0	0	0	35.0266	45.5737	7.94409
1641	42672	0	0	0	0	1	0	1	0	0	0	0	0	0	0	0.09	0	31468.2	32478.5	60320.9	77016.6	0	0	0	35.0265	45.5868	3.79522
1642	42673	0	0	0	0	1	0	0	0	0	0	0	0	0	0	0.09	0	30282.8	32106.9	60123.6	77001	0	0	0	35.0265	45.6	8.45662
1643	42674	0	0	0	0	1	1	1	0	0	0	0	0	0	0	0.09	0	29098.6	31776.2	59949.7	77004.2	0	0	0	35.0264	45.6131	6.50547
1644	42675	0	0	0	0	1	0	0	0	0	0	0	0	0	0	0.33	0	27915.8	31487.9	59799.4	77026	0	0	0	35.0263	45.6263	0.964589
1645	42676	0	0	0	0	1	1	1	0	0	0	0	0	0	0	0.33	0	26734.4	31243.1	59672.9	77066.5	0	0	0	35.0263	45.6395	3.87227
1646	42677	0	0	0	0	1	1	0	0	0	0	0	0	0	0	0.33	0	25554.8	31042.7	59570.2	77125.6	0	0	0	35.0262	45.6526	12.5743
1647	42678	0	0	0	0	1	0	1	0	0	0	0	0	0	0	0.33	0	24377.2	30887.7	59491.6	77203.4	0	0	0	35.0261	45.6658	13.4256
1648	42679	0	0	0	0	1	1	1	0	0	0	0	0	0	0	0.65	0	23201.9	30778.7	59437.1	77299.7	0	0	0	35.026	45.6789	9.16771
1649	42680	0	0	0	0	1	0	0	0	0	0	0	0	0	0	0.65	0	22029.3	30716.3	59406.8	77414.5	0	0	0	35.026	45.6921	3.9627
1650	42681	0	0	0	0	1	0	0	0	0	0	0	0	0	0	0.65	0	20859.8	30700.7	59400.8	77547.7	0	0	0	35.0259	45.7052	9.98458
1651	42682	0	0	0	0	1	0	0	0	0	0	0	0	0	0	0.65	0	19693.9	30731.9	59418.9	77699.2	0	0	0	35.0258	45.7184	12.0966
1652	42683	0	0	0	0	1	0	1	0	0	0	1	1	0	0	0.94	0.006	18530	30809.9	59461.3	77868.9	0	0	0	35.0257	45.7315	8.10455
1653	42684	0	0	0	0	1	0	0	0	0	0	1	1	0	0	0.94	0.006	17366.6	30934.3	59527.9	78056.6	0	0	0	35.0257	45.7447	21.0704
1654	42686	0	0	0	0	1	0	0	0	0	0	1	1	0	0	0.94	0.006	15057.2	31319.8	59733.2	78485.9	0	0	0	35.0255	45.771	22.2934
1655	42687	0	0	0	0	1	0	0	0	0	0	1	1	0	0	1.1	0	13914	31579.3	59871.6	78727.1	0	0	0	35.0254	45.7841	13.4483
1656	42688	0	0	0	0	1	0	0	0	0	0	1	1	0	0	1.1	0	12781.2	31881.8	60033.7	78985.8	0	0	0	35.0253	45.7973	8.43476
1657	42689	0	0	0	0	1	1	0	0	0	0	1	1	0	0	1.1	0	11661.9	32226.2	60219.3	79261.8	0	0	0	35.0252	45.8104	20.8316
1658	42690	0	0	0	0	1	0	1	0	0	0	1	1	0	0	1.1	0	10560.3	32611.2	60428.2	79555	0	0	0	35.0251	45.8236	13.0781
1659	42691	0	0	0	0	1	1	0	0	0	0	1	1	0	0	0.96	0	9470.48	33035.3	60660.1	79865.1	0	0	0	35.0251	45.8368	9.224
1660	42692	0	0	0	0	1	1	1	0	0	0	1	1	0	0	0.96	0	8367.2	33497	60914.8	80192	0	0	0	35.025	45.8499	8.87081
1661	42693	0	0	0	0	1	1	1	0	0	0	1	1	0	0	0.96	0	7280.11	33994.9	61191.9	80535.5	0	0	0	35.0249	45.8631	15.8958
1662	42695	0	0	0	0	1	1	0	0	0	0	1	1	0	0	0.72	0	5092.15	35092.6	61812.4	81271.1	0	0	0	35.0247	45.8894	23.9257
1663	42696	0	0	0	0	1	1	1	0	0	0	1	0	0	0	0.72	0	3981.21	35689.4	62155	81663	0	0	0	35.0246	45.9025	16.0477
1664	42697	0	0	0	0	1	0	1	0	0	0	1	0	0	0	0.72	0	2906.89	36316	62518.9	82070.5	0	0	0	35.0245	45.9157	10.6025
1665	42698	0	0	0	0	1	1	0	0	0	0	1	0	0	0	0.72	0	1788.85	36970.9	62903.5	82493.4	0	0	0	35.0244	45.9288	17.1285
1666	42699	0	0	0	0	0	0	1	0	0	0	0	0	0	0	0.55	0	721.11	37652.8	63308.5	82931.5	0	0	0	35.0243	45.942	39.078
1667	42700	0	0	0	0	0	0	1	0	0	0	0	0	0	0	0.55	0	316.228	38360	63733.6	83384.6	0	0	0	35.0242	45.9551	32.6438
1668	42701	0	0	0	0	0	0	1	0	0	0	0	0	0	0	0.55	0	1341.64	39091.3	64178.3	83852.5	0	0	0	35.0241	45.9683	41.3879
1669	42702	0	0	0	0	0	0	1	0	0	0	0	0	0	0	0.55	0	2385.37	39845.3	64642.2	84334.8	0	0	0	35.024	45.9814	11.531
1670	42703	0	0	0	0	0	1	0	0	0	0	0	0	0	0	0.52	0	3440.93	40620.8	65124.9	84831.4	0	0	0	35.0239	45.9946	19.0602
1671	42704	0	0	0	0	0	0	1	0	0	0	0	0	0	0	0.52	0	4472.14	41416.5	65626	85341.9	0	0	0	35.0238	46.0077	36.1754
1672	42705	0	0	0	0	0	0	0	0	0	0	0	0	0	0	0.52	0	5507.27	42231.4	66145.1	85866.2	0	0	0	35.0237	46.0209	29.7802
1673	42706	0	0	0	0	0	1	0	0	0	0	0	0	0	0	0.52	0	6551.34	43064.3	66681.7	86403.9	0	0	0	35.0235	46.034	34.44
1674	42707	0	0	0	0	1	1	1	0	0	0	0	0	0	0	0.59	0.0255	7580.24	43912.8	67235.5	86954.9	0	0	0	35.0234	46.0472	39.177
1675	42708	0	0	0	0	1	0	0	0	0	0	0	0	0	0	0.59	0.0255	8621.48	44776	67806	87518.9	0	0	0	35.0233	46.0603	36.2551
1676	42709	0	0	0	0	1	1	0	0	0	0	0	0	0	0	0.59	0.0255	9596.35	45654.5	68392.8	88095.6	0	0	0	35.0232	46.0735	42.9611
1677	42710	0	0	0	0	1	0	0	0	0	0	0	0	0	0	0.59	0.0255	10568.3	46547.3	68995.4	88684.8	0	0	0	35.0231	46.0867	36.5926
1678	42711	0	0	0	0	0	0	0	0	0	0	0	0	0	0	0.31	0.1416	11560.3	47453.7	69613.6	89286.3	0	0	0	35.023	46.0998	29.7666
1679	42712	0	0	0	0	1	1	0	0	0	0	0	0	0	0	0.24	0.1511	12536.3	48372.8	70246.8	89899.7	0	0	0	35.0228	46.113	38.5477
1680	42713	0	0	0	0	1	1	0	0	0	0	0	0	0	0	0.24	0.1511	13509.3	49304.1	70894.6	90524.9	0	0	0	35.0227	46.1261	24.5707
1681	42714	0	0	0	0	1	0	0	0	0	0	0	0	0	0	0.24	0.1511	14469.3	50246.7	71556.8	91161.6	0	0	0	35.0226	46.1393	47.5869
1682	42715	0	0	0	0	0	1	0	0	0	0	0	0	0	0	-0.06	0.2355	15357.4	51200.1	72232.8	91809.6	0	0	0	35.0225	46.1524	26.3418
1683	42716	0	0	0	0	0	1	0	0	0	0	0	0	0	0	-0.06	0.2355	16260.7	52163.7	72922.2	92468.6	0	0	0	35.0223	46.1656	23.1619
1684	42717	0	0	0	0	0	0	0	0	0	0	0	0	0	0	-0.06	0.2355	17140.6	53136.9	73624.8	93138.4	0	0	0	35.0222	46.1787	38.9248
1685	42718	0	0	0	0	0	0	0	0	0	0	0	0	0	0	-0.06	0.2355	18042.4	54119.2	74340.1	93818.8	0	0	0	35.0221	46.1919	36.0779
1686	42719	0	0	0	0	0	0	0	0	0	0	0	0	0	0	-0.62	0.2821	18938.1	55110.2	75067.8	94509.5	0	0	0	35.022	46.205	18.6675
1687	42720	0	0	0	0	0	0	0	0	0	0	0	0	0	0	-0.62	0.2821	19865.8	56109.3	75807.5	95210.3	0	0	0	35.0218	46.2182	42.6568
1688	42721	0	0	0	0	0	0	0	0	0	0	0	0	0	0	-0.62	0.2821	20821.4	57116.1	76558.8	95921	0	0	0	35.0217	46.2313	46.1329
1689	42722	0	0	0	0	0	0	0	0	0	0	0	0	0	0	-0.62	0.2821	21801.1	58130.3	77321.5	96641.4	0	0	0	35.0216	46.2445	28.8432
1690	42947	0	0	0	0	0	0	1	0	0	0	0	0	0	0	0.01	0	47083.9	39454.9	63784.4	77727	0	0	0	35.0164	45.4158	2.48929
1691	42948	0	0	0	0	0	0	1	0	0	0	0	0	0	0	0.01	0	45893.9	38668.5	63302.8	77470.3	0	0	0	35.0164	45.4289	10.502
1692	42949	0	0	0	0	0	0	0	0	0	0	0	0	0	0	0.01	0	44704.5	37903.7	62840.5	77231.3	0	0	0	35.0163	45.4421	15.0161
1693	42950	0	0	0	0	0	1	0	0	0	0	0	0	0	0	0.01	0	43515.6	37161.9	62397.8	77010.4	0	0	0	35.0163	45.4552	2.75601
1694	42951	0	0	0	0	0	1	1	0	0	0	0	0	0	0	0.02	0	42327.4	36444.6	61975.2	76807.6	0	0	0	35.0162	45.4684	1.59551
1695	42952	0	0	0	0	0	1	1	0	0	0	0	0	0	0	0.02	0	41139.9	35753.2	61573.1	76623	0	0	0	35.0162	45.4815	5.62626
1696	42953	0	0	0	0	0	1	0	0	0	0	0	0	0	0	0.02	0	39953.1	35089.2	61191.9	76456.8	0	0	0	35.0161	45.4947	6.05844
1697	42954	0	0	0	0	0	1	0	0	0	0	0	0	0	0	0.02	0	38767.1	34454.2	60832	76309.1	0	0	0	35.0161	45.5078	10.1279
1698	42955	0	0	0	0	1	1	0	0	0	0	0	0	0	0	0.06	0	37582	33849.8	60493.7	76180	0	0	0	35.016	45.521	8.01264
1699	42956	0	0	0	0	1	0	0	0	0	0	0	0	0	0	0.06	0	36397.9	33277.8	60177.5	76069.7	0	0	0	35.0159	45.5341	12.0586
1700	42958	0	0	0	0	1	0	0	0	0	0	0	0	0	0	0.06	0	34033.1	32237.4	59612.5	75905.5	0	0	0	35.0158	45.5605	3.71486
1701	42959	0	0	0	0	1	1	1	0	0	0	0	0	0	0	0.15	0	32852.6	31772.5	59364.4	75851.7	0	0	0	35.0158	45.5736	3.23528
1702	42960	0	0	0	0	1	0	0	0	0	0	0	0	0	0	0.15	0	31673.5	31346.6	59139.6	75816.9	0	0	0	35.0157	45.5868	3.39032
1703	42961	0	0	0	0	1	0	0	0	0	0	0	0	0	0	0.15	0	30496.1	30961.4	58938.4	75801.1	0	0	0	35.0156	45.5999	2.67691
1704	42962	0	0	0	0	1	1	0	0	0	0	0	0	0	0	0.15	0	29320.5	30618.5	58761	75804.2	0	0	0	35.0156	45.6131	3.2214
1705	42963	0	0	0	0	1	0	0	0	0	0	0	0	0	0	0.33	0	28146.9	30319.1	58607.6	75826.4	0	0	0	35.0155	45.6262	0.457532
1706	42964	0	0	0	0	1	0	1	0	0	0	0	0	0	0	0.33	0	26975.7	30064.8	58478.5	75867.5	0	0	0	35.0154	45.6394	0.45483
1707	42965	0	0	0	0	1	0	1	0	0	0	0	0	0	0	0.33	0	25807.2	29856.5	58373.7	75927.6	0	0	0	35.0154	45.6525	6.48792
1708	42966	0	0	0	0	1	0	0	0	0	0	0	0	0	0	0.33	0	24641.6	29695.3	58293.5	76006.6	0	0	0	35.0153	45.6657	15.593
1709	42967	0	0	0	0	1	0	0	0	0	0	0	0	0	0	0.65	0	23477.6	29581.9	58237.9	76104.4	0	0	0	35.0152	45.6788	11.66
1710	42968	0	0	0	0	1	0	0	0	0	0	0	0	0	0	0.65	0	22314.1	29516.9	58207	76221	0	0	0	35.0152	45.692	12.7786
1711	42969	0	0	0	0	1	0	0	0	0	0	0	0	0	0	0.65	0	21154.7	29500.7	58200.8	76356.3	0	0	0	35.0151	45.7051	2.23412
1712	42970	0	0	0	0	1	0	0	0	0	0	0	0	0	0	0.65	0	20000	29533.2	58219.3	76510.1	0	0	0	35.015	45.7183	22.891
1713	42971	0	0	0	0	1	0	0	0	0	0	1	1	0	0	0.94	0.006	18851	29614.4	58262.6	76682.5	0	0	0	35.0149	45.7314	10.4226
1714	42973	0	0	0	0	1	1	1	0	0	0	1	1	0	0	0.94	0.006	16574.7	29920.7	58423	77082	0	0	0	35.0148	45.7577	22.7731
1715	42974	0	0	0	0	1	1	1	0	0	0	1	1	0	0	0.94	0.006	15450.6	30144.5	58540	77309	0	0	0	35.0147	45.7709	18.9882
1716	42975	0	0	0	0	1	0	0	0	0	0	1	1	0	0	1.1	0	14338.8	30414	58681.3	77553.9	0	0	0	35.0146	45.784	7.65197
1717	42976	0	0	0	0	1	0	0	0	0	0	1	1	0	0	1.1	0	13242.4	30728	58846.7	77816.5	0	0	0	35.0145	45.7972	8.5799
1718	42977	0	0	0	0	1	0	0	0	0	0	1	1	0	0	1.1	0	12146.2	31085.2	59036	78096.6	0	0	0	35.0144	45.8103	8.74034
1719	42978	0	0	0	0	1	0	0	0	0	0	1	1	0	0	1.1	0	11049.4	31484.1	59249.1	78394.1	0	0	0	35.0143	45.8235	16.9775
1720	42979	0	0	0	0	1	0	0	0	0	0	1	1	0	0	0.96	0	9953.89	31923.2	59485.5	78708.8	0	0	0	35.0142	45.8366	2.48683
1721	42980	0	0	0	0	1	0	1	0	0	0	1	1	0	0	0.96	0	8856.64	32400.8	59745.2	79040.5	0	0	0	35.0141	45.8498	22.1487
1722	42981	0	0	0	0	1	0	0	0	0	0	1	1	0	0	0.96	0	7762.09	32915.2	60027.7	79388.9	0	0	0	35.0141	45.8629	18.8819
1723	42982	0	0	0	0	1	1	1	0	0	0	1	1	0	0	0.96	0	6664.08	33464.8	60332.8	79753.9	0	0	0	35.014	45.8761	7.6244
1724	42983	0	0	0	0	1	0	1	0	0	0	1	1	0	0	0.72	0	5571.36	34047.8	60660.1	80135.1	0	0	0	35.0139	45.8892	9.87669
1725	42985	0	0	0	0	1	1	1	0	0	0	1	0	0	0	0.72	0	3383.78	35307.4	61379.9	80945.7	0	0	0	35.0137	45.9156	21.6018
1726	42986	0	0	0	0	1	0	1	0	0	0	1	0	0	0	0.72	0	2282.54	35980.7	61771.6	81374.4	0	0	0	35.0136	45.9287	13.9741
1727	42987	0	0	0	0	0	0	1	0	0	0	0	0	0	0	0.55	0	1220.66	36680.9	62184	81818.6	0	0	0	35.0135	45.9419	42.6126
1728	42988	0	0	0	0	0	0	1	0	0	0	0	0	0	0	0.55	0	200	37406.6	62616.7	82277.8	0	0	0	35.0134	45.955	36.7823
1729	42989	0	0	0	0	0	0	0	0	0	0	0	0	0	0	0.55	0	761.577	38156.1	63069.2	82751.9	0	0	0	35.0133	45.9682	34.7647
1730	42990	0	0	0	0	0	1	0	0	0	0	0	0	0	0	0.55	0	1788.85	38928.3	63541.2	83240.6	0	0	0	35.0132	45.9813	47.2389
1731	42991	0	0	0	0	1	0	1	0	0	0	1	0	0	0	0.96	0	2830.19	39721.7	64032.3	83743.7	0	0	0	35.013	45.9945	36.2265
1732	42992	0	0	0	0	1	0	0	0	0	0	1	0	0	0	0.96	0	3883.3	40535	64541.8	84260.8	0	0	0	35.0129	46.0076	35.1586
1733	42993	0	0	0	0	1	1	1	0	0	0	1	0	0	0	0.96	0	4909.18	41367.3	65069.6	84791.7	0	0	0	35.0128	46.0208	36.1901
1734	42994	0	0	0	0	1	1	0	0	0	0	1	1	0	0	0.96	0	5948.11	42215.8	65615	85336.3	0	0	0	35.0127	46.0339	36.4217
1735	42995	0	0	0	0	1	1	0	0	0	0	0	0	0	0	0.61	0.0549	6940.46	43079.6	66177.7	85894.1	0	0	0	35.0126	46.0471	35.3317
1736	42996	0	0	0	0	1	1	0	0	0	0	0	0	0	0	0.61	0.0549	7920.23	43959.2	66757.3	86465	0	0	0	35.0125	46.0602	41.0668
1737	42997	0	0	0	0	1	0	0	0	0	0	0	0	0	0	0.61	0.0549	8904.49	44853.7	67353.2	87048.7	0	0	0	35.0124	46.0734	28.9713
1738	42998	0	0	0	0	1	0	0	0	0	0	0	0	0	0	0.61	0.0549	9881.3	45762.1	67965.1	87645	0	0	0	35.0123	46.0865	32.3685
1739	42999	0	0	0	0	1	1	0	0	0	0	0	0	0	0	0.24	0.1511	10860	46683.7	68592.5	88253.5	0	0	0	35.0121	46.0997	34.9116
1740	43000	0	0	0	0	1	0	0	0	0	0	0	0	0	0	0.24	0.1511	11843.1	47617.8	69235	88874.1	0	0	0	35.012	46.1128	33.1136
1741	43001	0	0	0	0	1	0	0	0	0	0	0	0	0	0	0.24	0.1511	12778.1	48563.5	69892.3	89506.4	0	0	0	35.0119	46.126	35.3696
1742	43002	0	0	0	0	1	0	0	0	0	0	0	0	0	0	0.24	0.1511	13662	49520.2	70563.8	90150.3	0	0	0	35.0118	46.1391	21.3011
1743	43003	0	0	0	0	0	0	0	0	0	0	0	0	0	0	-0.06	0.2355	14567.1	50487.3	71249.2	90805.5	0	0	0	35.0117	46.1523	24.6291
1744	43004	0	0	0	0	0	1	0	0	0	0	0	0	0	0	-0.06	0.2355	15446.7	51464.3	71948.1	91471.7	0	0	0	35.0115	46.1654	31.2985
1745	43005	0	0	0	0	0	1	0	0	0	0	0	0	0	0	-0.06	0.2355	16346.6	52450.5	72660.1	92148.8	0	0	0	35.0114	46.1786	51.3595
1746	43006	0	0	0	0	0	0	0	0	0	0	0	0	0	0	-0.06	0.2355	17246.7	53445.4	73384.8	92836.4	0	0	0	35.0113	46.1917	38.1085
1747	43007	0	0	0	0	0	1	0	0	0	0	0	0	0	0	-0.62	0.2821	18181.6	54448.6	74121.9	93534.4	0	0	0	35.0111	46.2049	41.6624
1748	43008	0	0	0	0	0	1	0	0	0	0	0	0	0	0	-0.62	0.2821	19146	55459.6	74870.9	94242.5	0	0	0	35.011	46.218	39.9334
1749	43009	0	0	0	0	0	0	0	0	0	0	0	0	0	0	-0.62	0.2821	20135.8	56478.1	75631.5	94960.4	0	0	0	35.0109	46.2312	41.1646
1750	43010	0	0	0	0	0	0	0	0	0	0	0	0	0	0	-0.62	0.2821	21111.6	57503.5	76403.5	95688	0	0	0	35.0107	46.2443	33.3072
1751	43235	0	0	0	0	0	0	0	0	0	0	0	0	0	0	0.01	0	47251.8	38565.9	62691.4	76557.2	0	0	0	35.0056	45.4157	22.722
1752	43236	0	0	0	0	0	1	1	0	0	0	0	0	0	0	0.01	0	46066.1	37761	62201.4	76296.5	0	0	0	35.0055	45.4289	3.62284
1753	43237	0	0	0	0	0	1	0	0	0	0	0	0	0	0	0.01	0	44881.3	36977.4	61730.8	76053.9	0	0	0	35.0055	45.442	16.3621
1754	43238	0	0	0	0	0	1	1	0	0	0	0	0	0	0	0.01	0	43697.3	36216.7	61280.1	75829.5	0	0	0	35.0054	45.4552	14.7364
1755	43239	0	0	0	0	0	0	0	0	0	0	0	0	0	0	0.02	0	42514.1	35480.3	60849.7	75623.5	0	0	0	35.0054	45.4683	2.55293
1756	43240	0	0	0	0	0	1	1	0	0	0	0	0	0	0	0.02	0	41331.9	34769.7	60440.1	75436.1	0	0	0	35.0053	45.4815	11.3241
1757	43241	0	0	0	0	0	1	1	0	0	0	0	0	0	0	0.02	0	40150.8	34086.5	60051.7	75267.3	0	0	0	35.0053	45.4946	12.5764
1758	43242	0	0	0	0	0	1	1	0	0	0	0	0	0	0	0.02	0	38970.9	33432.5	59684.9	75117.2	0	0	0	35.0052	45.5078	5.85939
1759	43243	0	0	0	0	1	1	0	0	0	0	0	0	0	0	0.06	0	37792.2	32809.3	59340.1	74986.1	0	0	0	35.0052	45.5209	7.73457
1760	43244	0	0	0	0	1	1	0	0	0	0	0	0	0	0	0.06	0	36614.9	32218.8	59017.7	74874	0	0	0	35.0051	45.5341	8.19574
1761	43245	0	0	0	0	1	0	1	0	0	0	0	0	0	0	0.06	0	35439.1	31662.8	58718.1	74781	0	0	0	35.0051	45.5472	4.26095
1762	43247	0	0	0	0	1	1	0	0	0	0	0	0	0	0	0.15	0	33092.8	30661.5	58188.4	74652.5	0	0	0	35.0049	45.5735	4.82491
1763	43248	0	0	0	0	1	0	0	0	0	0	0	0	0	0	0.15	0	31922.6	30220	57959	74617.2	0	0	0	35.0049	45.5867	3.6676
1764	43249	0	0	0	0	1	1	1	0	0	0	0	0	0	0	0.15	0	30754.7	29820.3	57753.7	74601.1	0	0	0	35.0048	45.5998	3.26519
1765	43250	0	0	0	0	1	0	0	0	0	0	0	0	0	0	0.15	0	29589.4	29464	57572.6	74604.3	0	0	0	35.0048	45.613	2.23227
1766	43251	0	0	0	0	1	0	0	0	0	0	0	0	0	0	0.33	0	28425.3	29152.9	57416.1	74626.8	0	0	0	35.0047	45.6261	0.916619
1767	43252	0	0	0	0	1	1	0	0	0	0	0	0	0	0	0.33	0	27261.7	28888.2	57284.3	74668.6	0	0	0	35.0046	45.6393	5.77767
1768	43253	0	0	0	0	1	0	1	0	0	0	0	0	0	0	0.33	0	26101.3	28671.4	57177.4	74729.6	0	0	0	35.0045	45.6524	5.15032
1769	43254	0	0	0	0	1	1	0	0	0	0	0	0	0	0	0.33	0	24944.7	28503.5	57095.4	74809.9	0	0	0	35.0045	45.6656	17.5095
1770	43255	0	0	0	0	1	0	0	0	0	0	0	0	0	0	0.65	0	23792.4	28385.4	57038.7	74909.3	0	0	0	35.0044	45.6787	9.45353
1771	43256	0	0	0	0	1	0	0	0	0	0	0	0	0	0	0.65	0	22645.1	28317.7	57007.1	75027.7	0	0	0	35.0043	45.6919	10.1813
1772	43257	0	0	0	0	1	0	0	0	0	0	0	0	0	0	0.65	0	21503.5	28300.7	57000.8	75165.1	0	0	0	35.0043	45.705	4.02509
1773	43258	0	0	0	0	1	0	0	0	0	0	0	0	0	0	0.65	0	20368.6	28334.6	57019.7	75321.4	0	0	0	35.0042	45.7182	12.9275
1774	43259	0	0	0	0	1	1	0	0	0	0	1	1	0	0	0.94	0.006	19241.6	28419.2	57063.9	75496.5	0	0	0	35.0041	45.7313	18.3081
1775	43260	0	0	0	0	1	0	1	0	0	0	1	1	0	0	0.94	0.006	18124	28554	57133.3	75690.2	0	0	0	35.004	45.7445	3.43621
1776	43261	0	0	0	0	1	1	1	0	0	0	1	1	0	0	0.94	0.006	17017.6	28738.3	57227.7	75902.3	0	0	0	35.0039	45.7576	4.18158
1777	43262	0	0	0	0	1	1	0	0	0	0	1	1	0	0	0.94	0.006	15924.8	28971.2	57347.1	76132.8	0	0	0	35.0039	45.7708	34.8873
1778	43264	0	0	0	0	1	0	0	0	0	0	1	1	0	0	1.1	0	13732.1	29577.9	57660.1	76648	0	0	0	35.0037	45.7971	12.1971
1779	43265	0	0	0	0	1	1	1	0	0	0	1	1	0	0	1.1	0	12631.7	29948.8	57853.3	76932.4	0	0	0	35.0036	45.8102	12.4591
1780	43266	0	0	0	0	1	0	0	0	0	0	1	1	0	0	1.1	0	11539.5	30362.6	58070.7	77234.4	0	0	0	35.0035	45.8234	14.4619
1781	43267	0	0	0	0	1	0	1	0	0	0	1	1	0	0	0.96	0	10438.9	30817.7	58312	77553.9	0	0	0	35.0034	45.8365	21.7015
1782	43268	0	0	0	0	1	1	0	0	0	0	1	1	0	0	0.96	0	9347.19	31312.1	58576.9	77890.4	0	0	0	35.0033	45.8497	1.99019
1783	43271	0	0	0	0	1	1	0	1	0	0	1	1	0	0	1.77	0.0463	6053.92	33013.5	59509.7	79001	0	0	0	35.003	45.8891	21.8633
1784	43272	0	0	0	0	1	1	0	1	0	0	1	0	0	0	1.77	0.0463	4964.88	33647.1	59865.6	79404	0	0	0	35.0029	45.9023	5.74301
1785	43273	0	0	0	0	1	0	0	1	0	0	1	0	0	0	1.77	0.0463	3894.87	34311.1	60243.3	79823.1	0	0	0	35.0029	45.9154	20.5369
1786	43274	0	0	0	0	1	0	0	1	0	0	1	0	0	0	1.77	0.0463	2863.56	35003.6	60642.3	80257.8	0	0	0	35.0028	45.9286	6.5273
1787	43276	0	0	0	0	0	0	0	0	0	0	1	0	0	0	1.34	0	781.025	36467.7	61502.9	81173.6	0	0	0	35.0025	45.9549	39.614
1788	43277	0	0	0	0	0	0	1	0	0	0	1	0	0	0	1.34	0	200	37236.1	61963.6	81654.1	0	0	0	35.0024	45.968	35.5173
1789	43278	0	0	0	0	0	0	0	0	0	0	1	0	0	0	1.34	0	1208.3	38027	62444	82149.4	0	0	0	35.0023	45.9812	44.104
1790	43279	0	0	0	0	1	0	0	0	0	0	1	0	0	0	0.96	0	2236.07	38838.8	62943.5	82659.1	0	0	0	35.0022	45.9943	38.0217
1791	43280	0	0	0	0	1	1	1	0	0	0	1	0	0	0	0.96	0	3264.97	39670.3	63461.9	83182.9	0	0	0	35.0021	46.0075	41.1498
1792	43281	0	0	0	0	1	1	0	0	0	0	1	0	0	0	0.96	0	4301.16	40518.8	63998.5	83720.7	0	0	0	35.002	46.0206	28.2505
1793	43282	0	0	0	0	1	0	1	0	0	0	1	0	0	0	0.96	0	5269.72	41383.2	64553	84272.2	0	0	0	35.0019	46.0338	36.1444
1794	43283	0	0	0	0	1	1	0	0	0	0	0	0	0	0	0.61	0.0549	6242.6	42264.1	65124.9	84837	0	0	0	35.0018	46.0469	28.5713
1795	43284	0	0	0	0	1	1	0	0	0	0	0	0	0	0	0.61	0.0549	7240.17	43160.3	65713.7	85415	0	0	0	35.0017	46.0601	30.9604
1796	43285	0	0	0	0	1	1	0	0	0	0	0	0	0	0	0.61	0.0549	8209.75	44071	66319	86005.8	0	0	0	35.0016	46.0732	18.526
1797	43286	0	0	0	0	1	0	0	0	0	0	0	0	0	0	0.61	0.0549	9183.68	44995.2	66940.3	86609.2	0	0	0	35.0014	46.0864	24.6828
1798	43287	0	0	0	0	1	0	0	0	0	0	0	0	0	0	0.24	0.1511	10178.9	45932.2	67577.3	87225	0	0	0	35.0013	46.0995	24.3837
1799	43288	0	0	0	0	1	0	0	0	0	0	0	0	0	0	0.24	0.1511	11088.7	46881.2	68229.4	87852.8	0	0	0	35.0012	46.1127	29.2933
1800	43289	0	0	0	0	1	1	0	0	0	0	0	0	0	0	0.24	0.1511	11967	47841.5	68896.2	88492.5	0	0	0	35.0011	46.1258	27.7244
1801	43290	0	0	0	0	1	0	0	0	0	0	0	0	0	0	0.24	0.1511	12870.1	48812.4	69577.4	89143.7	0	0	0	35.001	46.139	35.3054
1802	43291	0	0	0	0	0	0	0	0	0	0	0	0	0	0	-0.06	0.2355	13753.5	49793.3	70272.4	89806.2	0	0	0	35.0008	46.1521	27.4618
1803	43292	0	0	0	0	0	0	0	0	0	0	0	0	0	0	-0.06	0.2355	14650.9	50783.6	70980.9	90479.8	0	0	0	35.0007	46.1653	23.1858
1804	43293	0	0	0	0	0	1	0	0	0	0	0	0	0	0	-0.06	0.2355	15556.7	51782.7	71702.5	91164.3	0	0	0	35.0006	46.1784	28.3941
1805	43294	0	0	0	0	0	1	0	0	0	0	0	0	0	0	-0.06	0.2355	16500	52790.2	72436.8	91859.2	0	0	0	35.0005	46.1915	31.8838
1806	43295	0	0	0	0	0	0	0	0	0	0	0	0	0	0	-0.62	0.2821	17474.8	53805.7	73183.4	92564.6	0	0	0	35.0003	46.2047	34.9622
1807	43296	0	0	0	0	0	0	0	0	0	0	0	0	0	0	-0.62	0.2821	18461.3	54828.6	73941.9	93280	0	0	0	35.0002	46.2178	42.2939
1808	43297	0	0	0	0	0	1	0	0	0	0	0	0	0	0	-0.62	0.2821	19442.7	55858.5	74712	94005.3	0	0	0	35.0001	46.231	37.5515
1809	43298	0	0	0	0	0	0	0	0	0	0	0	0	0	0	-0.62	0.2821	20424.7	56895.1	75493.4	94740.3	0	0	0	34.9999	46.2441	16.8296
1810	43523	0	0	0	0	0	0	1	0	0	0	0	0	0	0	0.01	0	47449.4	37694.2	61602.4	75388.3	0	0	0	34.9948	45.4157	2.86879
1811	43524	0	0	0	0	0	1	0	0	0	0	0	0	0	0	0.01	0	46268.9	36870.2	61103.6	75123.6	0	0	0	34.9947	45.4288	5.54486
1812	43525	0	0	0	0	0	1	1	0	0	0	0	0	0	0	0.01	0	45089.4	36067.3	60624.5	74877.2	0	0	0	34.9947	45.442	19.6225
1813	43526	0	0	0	0	0	1	1	0	0	0	0	0	0	0	0.01	0	43910.9	35287	60165.5	74649.3	0	0	0	34.9946	45.4551	13.0201
1814	43527	0	0	0	0	0	1	0	0	0	0	0	0	0	0	0.02	0	42733.7	34530.7	59727.1	74440	0	0	0	34.9946	45.4683	15.855
1815	43528	0	0	0	0	0	1	0	0	0	0	0	0	0	0	0.02	0	41557.8	33800.1	59309.8	74249.6	0	0	0	34.9945	45.4814	6.49467
1816	43529	0	0	0	0	0	1	0	0	0	0	0	0	0	0	0.02	0	40383.3	33097	58913.9	74078.1	0	0	0	34.9945	45.4946	8.76189
1817	43530	0	0	0	0	0	1	1	0	0	0	0	0	0	0	0.02	0	39210.3	32423	58540	73925.6	0	0	0	34.9944	45.5077	11.8586
1818	43531	0	0	0	0	1	0	1	0	0	0	0	0	0	0	0.06	0	38039.1	31780	58188.4	73792.4	0	0	0	34.9944	45.5209	6.50463
1819	43532	0	0	0	0	1	1	0	0	0	0	0	0	0	0	0.06	0	36869.6	31170	57859.6	73678.5	0	0	0	34.9943	45.534	5.84548
1820	43533	0	0	0	0	1	1	0	0	0	0	0	0	0	0	0.06	0	35702.2	30594.9	57553.9	73584	0	0	0	34.9942	45.5472	8.73547
1821	43534	0	0	0	0	1	0	1	0	0	0	0	0	0	0	0.06	0	34537.1	30056.8	57271.7	73508.9	0	0	0	34.9942	45.5603	3.38236
1822	43535	0	0	0	0	1	0	0	0	0	0	0	0	0	0	0.15	0	33373	29557.6	57013.4	73453.4	0	0	0	34.9941	45.5735	4.73393
1823	43536	0	0	0	0	1	0	0	0	0	0	0	0	0	0	0.15	0	32209.3	29099.3	56779.3	73417.4	0	0	0	34.9941	45.5866	2.88807
1824	43537	0	0	0	0	1	0	1	0	0	0	0	0	0	0	0.15	0	31048.3	28684	56569.7	73401.1	0	0	0	34.994	45.5998	3.44241
1825	43538	0	0	0	0	1	0	0	0	0	0	0	0	0	0	0.15	0	29890.5	28313.4	56384.8	73404.4	0	0	0	34.9939	45.6129	5.52297
1826	43539	0	0	0	0	1	0	0	0	0	0	0	0	0	0	0.33	0	28736	27989.5	56225	73427.2	0	0	0	34.9939	45.6261	1.75032
1827	43540	0	0	0	0	1	1	1	0	0	0	0	0	0	0	0.33	0	27585.5	27713.7	56090.4	73469.7	0	0	0	34.9938	45.6392	4.02103
1828	43541	0	0	0	0	1	0	0	0	0	0	0	0	0	0	0.33	0	26439.4	27487.6	55981.2	73531.8	0	0	0	34.9937	45.6523	4.31274
1829	43542	0	0	0	0	1	1	0	0	0	0	0	0	0	0	0.33	0	25298.2	27312.5	55897.5	73613.3	0	0	0	34.9937	45.6655	7.69739
1830	43543	0	0	0	0	1	0	0	0	0	0	0	0	0	0	0.65	0	24162.8	27189.2	55839.5	73714.3	0	0	0	34.9936	45.6786	9.52656
1831	43544	0	0	0	0	1	0	0	0	0	0	0	0	0	0	0.65	0	23033.9	27118.4	55807.3	73834.7	0	0	0	34.9935	45.6918	12.6597
1832	43545	0	0	0	0	1	0	0	0	0	0	0	0	0	0	0.65	0	21912.6	27100.7	55800.8	73974.3	0	0	0	34.9934	45.7049	11.1855
1833	43546	0	0	0	0	1	0	0	0	0	0	0	0	0	0	0.65	0	20800	27136.1	55820.2	74133.1	0	0	0	34.9934	45.7181	23.2148
1834	43547	0	0	0	0	1	0	0	0	0	0	1	1	0	0	0.94	0.006	19697.7	27224.4	55865.3	74311	0	0	0	34.9933	45.7312	27.7941
1835	43548	0	0	0	0	1	0	0	0	0	0	1	1	0	0	0.94	0.006	18607.5	27365.1	55936.1	74507.7	0	0	0	34.9932	45.7444	29.0054
1836	43549	0	0	0	0	1	1	0	0	0	0	0	0	0	0	0.21	0.3869	17504.6	27557.4	56032.6	74723.2	0	0	0	34.9931	45.7575	16.4194
1837	43550	0	0	0	0	1	1	1	0	0	0	0	0	0	0	0.21	0.3869	16414.9	27800.2	56154.5	74957.3	0	0	0	34.993	45.7707	5.68068
1838	43551	0	0	0	0	0	1	0	0	0	0	0	0	0	0	0.66	0.3827	15311.4	28092.2	56301.8	75209.8	0	0	0	34.993	45.7838	16.4922
1839	43552	0	0	0	0	0	0	0	0	0	0	0	0	0	0	0.66	0.3827	14222.5	28431.8	56474.2	75480.6	0	0	0	34.9929	45.797	11.7999
1840	43554	0	0	0	0	0	1	1	0	0	0	0	0	0	0	0.66	0.3827	12030.4	29247.4	56893.3	76076	0	0	0	34.9927	45.8233	3.85382
1841	43556	0	0	0	0	1	0	0	1	1	0	1	1	0	0	1.43	0.215	9838.7	30231.9	57409.8	76741.9	0	0	0	34.9925	45.8496	6.98724
1842	43557	0	0	0	0	1	0	1	1	1	0	1	1	0	0	1.43	0.215	8732.13	30782.6	57703.8	77100.7	0	0	0	34.9924	45.8627	5.91322
1843	43558	0	0	0	0	1	0	0	1	1	0	1	1	0	0	1.43	0.215	7647.88	31369.6	58021.1	77476.4	0	0	0	34.9923	45.8759	11.707
1844	43559	0	0	0	0	1	1	0	1	0	0	1	1	0	0	1.77	0.0463	6576.47	31990.8	58361.4	77868.9	0	0	0	34.9922	45.889	13.1818
1845	43560	0	0	0	0	1	0	1	1	0	0	1	0	0	0	1.77	0.0463	5546.17	32644.3	58724.2	78277.7	0	0	0	34.9921	45.9022	8.0702
1846	43561	0	0	0	0	1	1	0	1	0	0	1	0	0	0	1.77	0.0463	4494.44	33328.2	59109.1	78702.7	0	0	0	34.992	45.9153	11.2244
1847	43562	0	0	0	0	1	1	1	1	0	0	1	0	0	0	1.77	0.0463	3448.19	34040.7	59515.8	79143.7	0	0	0	34.9919	45.9285	18.8596
1848	43564	0	0	0	0	0	0	0	0	0	0	1	0	0	0	1.34	0	1389.24	35544.5	60392.5	80072.2	0	0	0	34.9917	45.9548	26.9192
1849	43565	0	0	0	0	0	0	1	0	0	0	1	0	0	0	1.34	0	360.555	36332.5	60861.6	80559.3	0	0	0	34.9916	45.9679	31.0944
1850	43566	0	0	0	0	0	1	0	0	0	0	1	0	0	0	1.34	0	583.095	37142.6	61350.6	81061.2	0	0	0	34.9915	45.981	27.7591
1851	43567	0	0	0	0	1	1	0	0	0	0	1	0	0	0	0.96	0	1640.12	37973.3	61859	81577.7	0	0	0	34.9914	45.9942	29.6049
1852	43568	0	0	0	0	1	0	0	0	0	0	1	0	0	0	0.96	0	2624.88	38821.8	62386.3	82108.5	0	0	0	34.9913	46.0073	22.3699
1853	43569	0	0	0	0	1	0	1	0	0	0	1	0	0	0	0.96	0	3605.55	39686.9	62932.1	82653.3	0	0	0	34.9912	46.0205	40.5809
1854	43570	0	0	0	0	1	1	1	0	0	0	1	0	0	0	0.96	0	4579.3	40569.1	63495.9	83211.8	0	0	0	34.9911	46.0336	44.7426
1855	43571	0	0	0	0	1	0	1	0	0	0	0	0	0	0	0.61	0.0549	5560.58	41467.2	64077.2	83783.8	0	0	0	34.991	46.0468	24.1888
1856	43572	0	0	0	0	1	1	0	0	0	0	0	0	0	0	0.61	0.0549	6543.7	42380.3	64675.6	84369	0	0	0	34.9909	46.0599	28.9958
1857	43573	0	0	0	0	1	1	0	0	0	0	0	0	0	0	0.61	0.0549	7516.65	43307.4	65290.5	84967.1	0	0	0	34.9907	46.0731	28.3515
1858	43574	0	0	0	0	1	1	0	0	0	0	0	0	0	0	0.61	0.0549	8489.99	44247.6	65921.5	85577.8	0	0	0	34.9906	46.0862	28.9462
1859	43575	0	0	0	0	1	1	0	0	0	0	0	0	0	0	0.24	0.1511	9402.13	45200.1	66568.2	86200.9	0	0	0	34.9905	46.0994	12.2491
1860	43576	0	0	0	0	1	0	0	0	0	0	0	0	0	0	0.24	0.1511	10272.8	46164.2	67230.1	86836.2	0	0	0	34.9904	46.1125	41.4911
1861	43577	0	0	0	0	1	0	0	0	0	0	0	0	0	0	0.24	0.1511	11173.2	47139.1	67906.8	87483.3	0	0	0	34.9903	46.1257	33.8403
1862	43578	0	0	0	0	1	0	0	0	0	0	0	0	0	0	0.24	0.1511	12061.5	48124.1	68597.7	88141.9	0	0	0	34.9901	46.1388	37.6504
1863	43579	0	0	0	0	0	0	0	0	0	0	0	0	0	0	-0.06	0.2355	12955.7	49118.7	69302.6	88811.9	0	0	0	34.99	46.152	29.1487
1864	43580	0	0	0	0	0	0	0	0	0	0	0	0	0	0	-0.06	0.2355	13868.3	50122.4	70020.9	89493	0	0	0	34.9899	46.1651	28.8422
1865	43581	0	0	0	0	0	0	0	0	0	0	0	0	0	0	-0.06	0.2355	14821.9	51134.4	70752.3	90184.9	0	0	0	34.9898	46.1782	35.649
1866	43582	0	0	0	0	0	0	0	0	0	0	0	0	0	0	-0.06	0.2355	15809.2	52154.5	71496.4	90887.4	0	0	0	34.9896	46.1914	29.4864
1867	43583	0	0	0	0	0	0	0	0	0	0	0	0	0	0	-0.62	0.2821	16786.3	53182	72252.7	91600.2	0	0	0	34.9895	46.2045	17.6292
1868	43584	0	0	0	0	0	1	0	0	0	0	0	0	0	0	-0.62	0.2821	17779.2	54216.7	73020.9	92323.1	0	0	0	34.9894	46.2177	39.6129
1869	43585	0	0	0	0	0	0	0	0	0	0	0	0	0	0	-0.62	0.2821	18752.3	55258	73800.6	93055.9	0	0	0	34.9892	46.2308	27.5764
1870	43586	0	0	0	0	0	0	0	0	0	0	0	0	0	0	-0.56	0.2508	19740.8	56305.7	74591.5	93798.3	0	0	0	34.9891	46.244	37.4349
1871	43811	0	0	0	0	0	1	0	0	0	0	0	0	0	0	0.01	0	47676.5	36840.9	60517.5	74220.5	0	0	0	34.9839	45.4156	17.9511
1872	43812	0	0	0	0	0	0	1	0	0	0	0	0	0	0	0.01	0	46501.7	35997.4	60009.8	73951.6	0	0	0	34.9839	45.4288	5.20674
1873	43813	0	0	0	0	0	0	0	0	0	0	0	0	0	0	0.01	0	45328.2	35174.6	59521.8	73701.3	0	0	0	34.9839	45.4419	4.0365
1874	43814	0	0	0	0	0	1	0	0	0	0	0	0	0	0	0.01	0	44156.2	34374	59054.3	73469.7	0	0	0	34.9838	45.4551	4.65617
1875	43815	0	0	0	0	0	1	1	0	0	0	0	0	0	0	0.02	0	42985.7	33597.2	58607.6	73257.1	0	0	0	34.9838	45.4682	14.7477
1876	43816	0	0	0	0	0	1	0	0	0	0	0	0	0	0	0.02	0	41816.9	32845.9	58182.2	73063.5	0	0	0	34.9837	45.4813	2.78334
1877	43817	0	0	0	0	0	1	0	0	0	0	0	0	0	0	0.02	0	40649.8	32121.8	57778.6	72889.2	0	0	0	34.9837	45.4945	12.3141
1878	43818	0	0	0	0	0	0	1	0	0	0	0	0	0	0	0.02	0	39484.8	31426.9	57397.3	72734.3	0	0	0	34.9836	45.5076	9.97908
1879	43819	0	0	0	0	1	1	1	0	0	0	0	0	0	0	0.06	0	38320.8	30763.1	57038.7	72598.9	0	0	0	34.9835	45.5208	3.04455
1880	43820	0	0	0	0	1	1	1	0	0	0	0	0	0	0	0.06	0	37157	30132.5	56703.2	72483.1	0	0	0	34.9835	45.5339	5.59864
1881	43821	0	0	0	0	1	0	0	0	0	0	0	0	0	0	0.06	0	35995.6	29537.3	56391.2	72387	0	0	0	34.9834	45.5471	3.50254
1882	43822	0	0	0	0	1	1	0	0	0	0	0	0	0	0	0.06	0	34836.8	28979.5	56103.2	72310.7	0	0	0	34.9834	45.5602	2.79534
1883	43823	0	0	0	0	1	1	0	0	0	0	0	0	0	0	0.15	0	33680.9	28461.4	55839.5	72254.3	0	0	0	34.9833	45.5734	3.34738
1884	43824	0	0	0	0	1	1	1	0	0	0	0	0	0	0	0.15	0	32528.1	27985.2	55600.4	72217.7	0	0	0	34.9832	45.5865	3.31928
1885	43825	0	0	0	0	1	1	0	0	0	0	0	0	0	0	0.15	0	31379	27553	55386.4	72201.1	0	0	0	34.9832	45.5997	2.64558
1886	43826	0	0	0	0	1	0	0	0	0	0	0	0	0	0	0.15	0	30233.8	27167.1	55197.6	72204.4	0	0	0	34.9831	45.6128	0.555244
1887	43827	0	0	0	0	1	1	1	0	0	0	0	0	0	0	0.33	0	29093	26829.3	55034.3	72227.7	0	0	0	34.983	45.626	1.47726
1888	43828	0	0	0	0	1	1	0	0	0	0	0	0	0	0	0.33	0	27957.1	26541.5	54896.7	72270.9	0	0	0	34.983	45.6391	3.14288
1889	43829	0	0	0	0	0	1	1	0	0	0	0	0	0	0	0.56	0.0488	26826.9	26305.3	54785.1	72333.9	0	0	0	34.9829	45.6523	3.42701
1890	43830	0	0	0	0	0	1	0	0	0	0	0	0	0	0	0.56	0.0488	25702.9	26122.2	54699.6	72416.9	0	0	0	34.9828	45.6654	6.25839
1891	43831	0	0	0	0	1	0	0	0	0	0	0	0	0	0	0.38	0.2158	24586.2	25993.3	54640.4	72519.5	0	0	0	34.9828	45.6786	2.02919
1892	43832	0	0	0	0	1	0	0	0	0	0	0	0	0	0	0.38	0.2158	23477.6	25919.3	54607.4	72641.9	0	0	0	34.9827	45.6917	12.9939
1893	43833	0	0	0	0	1	0	0	0	0	0	0	0	0	0	0.38	0.2158	22378.6	25900.8	54600.8	72783.8	0	0	0	34.9826	45.7049	4.92863
1894	43834	0	0	0	0	1	0	0	0	0	0	0	0	0	0	0.38	0.2158	21285	25937.8	54620.6	72945.2	0	0	0	34.9825	45.718	6.85139
1895	43835	0	0	0	0	1	0	0	0	0	0	0	0	0	0	0.21	0.3869	20185.4	26030.2	54666.7	73125.9	0	0	0	34.9825	45.7311	36.4956
1896	43836	0	0	0	0	1	0	0	0	0	0	0	0	0	0	0.21	0.3869	19092.4	26177.3	54739.1	73325.9	0	0	0	34.9824	45.7443	13.6989
1897	43837	0	0	0	0	1	0	1	0	0	0	0	0	0	0	0.21	0.3869	17992.2	26378.2	54837.7	73544.8	0	0	0	34.9823	45.7574	10.6634
1898	43838	0	0	0	0	1	1	0	0	0	0	0	0	0	0	0.21	0.3869	16900	26631.7	54962.3	73782.7	0	0	0	34.9822	45.7706	28.3944
1899	43839	0	0	0	0	0	0	0	0	0	0	0	0	0	0	0.66	0.3827	15799.1	26936.4	55112.7	74039.2	0	0	0	34.9821	45.7837	14.6951
1900	43840	0	0	0	0	0	0	0	0	0	0	0	0	0	0	0.66	0.3827	14707.8	27290.5	55288.8	74314.2	0	0	0	34.982	45.7969	5.79955
1901	43841	0	0	0	0	0	1	1	0	0	0	0	0	0	0	0.66	0.3827	13605.9	27692.1	55490.3	74607.5	0	0	0	34.982	45.81	3.10646
1902	43842	0	0	0	0	0	0	0	0	0	0	0	0	0	0	0.66	0.3827	12516	28139.1	55716.9	74918.9	0	0	0	34.9819	45.8232	1.37207
1903	43843	0	0	0	0	1	0	1	1	1	0	1	1	0	0	1.43	0.215	11412.7	28629.5	55968.3	75248.1	0	0	0	34.9818	45.8363	4.17417
1904	43844	0	0	0	0	1	0	1	1	1	0	1	1	0	0	1.43	0.215	10331	29161.1	56244.2	75595	0	0	0	34.9817	45.8495	13.3197
1905	43845	0	0	0	0	1	1	1	1	1	0	1	1	0	0	1.43	0.215	9259.05	29731.6	56544.2	75959.2	0	0	0	34.9816	45.8626	29.8028
1906	43846	0	0	0	0	1	1	0	1	1	0	1	1	0	0	1.43	0.215	8215.23	30338.9	56868	76340.6	0	0	0	34.9815	45.8758	3.93061
1907	43847	0	0	0	0	1	1	0	1	0	0	1	1	0	0	1.77	0.0463	7169.38	30980.8	57215.1	76738.8	0	0	0	34.9814	45.8889	17.3763
1908	43848	0	0	0	0	1	0	1	1	0	0	1	1	0	0	1.77	0.0463	6129.44	31655.2	57585.2	77153.6	0	0	0	34.9813	45.902	4.17102
1909	43849	0	0	0	0	1	1	0	1	0	0	1	0	0	0	1.77	0.0463	5099.02	32360	57977.7	77584.8	0	0	0	34.9812	45.9152	10.1957
1910	43850	0	0	0	0	1	1	0	1	0	0	1	0	0	0	1.77	0.0463	4049.69	33093.4	58392.2	78032	0	0	0	34.9811	45.9283	10.1631
1911	43851	0	0	0	0	0	1	0	0	0	0	1	0	0	0	1.34	0	3001.67	33853.4	58828.3	78495.1	0	0	0	34.981	45.9415	12.5662
1912	43852	0	0	0	0	0	1	1	0	0	0	1	0	0	0	1.34	0	1972.31	34638.3	59285.5	78973.7	0	0	0	34.9809	45.9546	27.5264
1913	43853	0	0	0	0	0	0	0	0	0	0	1	0	0	0	1.34	0	943.398	35446.4	59763.3	79467.5	0	0	0	34.9808	45.9678	21.2366
1914	43854	0	0	0	0	0	1	0	0	0	0	1	0	0	0	1.34	0	0	36276.3	60261.2	79976.3	0	0	0	34.9807	45.9809	30.8546
1915	43855	0	0	0	0	1	0	0	0	0	0	1	0	0	0	0.96	0	943.398	37124.8	60778.7	80499.7	0	0	0	34.9806	45.9941	41.8426
1916	43856	0	0	0	0	1	1	0	0	0	0	1	0	0	0	0.96	0	1920.94	37990.7	61315.3	81037.5	0	0	0	34.9805	46.0072	42.7118
1917	43857	0	0	0	0	1	1	0	0	0	0	1	0	0	0	0.96	0	2915.48	38874.3	61870.6	81589.5	0	0	0	34.9804	46.0204	37.1902
1918	43858	0	0	0	0	1	0	1	0	0	0	1	0	0	0	0.96	0	3883.3	39774.5	62444	82155.2	0	0	0	34.9803	46.0335	32.8587
1919	43859	0	0	0	0	1	1	1	0	0	0	0	0	0	0	0.61	0.0549	4860.04	40690.2	63035	82734.5	0	0	0	34.9801	46.0466	16.734
1920	43860	0	0	0	0	1	1	1	0	0	0	0	0	0	0	0.61	0.0549	5852.35	41620.3	63643.1	83327.1	0	0	0	34.98	46.0598	27.5319
1921	43861	0	0	0	0	1	1	1	0	0	0	0	0	0	0	0.61	0.0549	6794.12	42564	64268	83932.6	0	0	0	34.9799	46.0729	29.1939
1922	43862	0	0	0	0	1	0	0	0	0	0	0	0	0	0	0.61	0.0549	7707.79	43520.2	64908.9	84550.8	0	0	0	34.9798	46.0861	32.7578
1923	43863	0	0	0	0	1	0	0	0	0	0	0	0	0	0	0.24	0.1511	8579.63	44488.3	65565.6	85181.5	0	0	0	34.9797	46.0992	32.9257
1924	43864	0	0	0	0	1	1	0	0	0	0	0	0	0	0	0.24	0.1511	9476.29	45467.5	66237.5	85824.2	0	0	0	34.9796	46.1124	35.8762
1925	43865	0	0	0	0	0	0	0	0	0	0	0	0	0	0	0.06	0.2014	10371.1	46457	66924.2	86478.9	0	0	0	34.9794	46.1255	28.9697
1926	43866	0	0	0	0	0	0	0	0	0	0	0	0	0	0	0.06	0.2014	11261	47456.2	67625.2	87145.2	0	0	0	34.9793	46.1387	37.913
1927	43867	0	0	0	0	0	0	0	0	0	0	0	0	0	0	-0.16	0.2394	12182.4	48464.5	68340.1	87822.8	0	0	0	34.9792	46.1518	30.2221
1928	43868	0	0	0	0	0	0	0	0	0	0	0	0	0	0	-0.16	0.2394	13148.8	49481.4	69068.4	88511.5	0	0	0	34.9791	46.1649	36.6337
1929	43869	0	0	0	0	0	0	0	0	0	0	0	0	0	0	-0.16	0.2394	14140	50506.3	69809.8	89211	0	0	0	34.9789	46.1781	36.567
1930	43870	0	0	0	0	0	1	0	0	0	0	0	0	0	0	-0.16	0.2394	15116.2	51538.8	70563.8	89921.1	0	0	0	34.9788	46.1912	38.1431
1931	43871	0	0	0	0	0	1	0	0	0	0	0	0	0	0	-0.56	0.2508	16101.2	52578.4	71330	90641.5	0	0	0	34.9787	46.2044	13.859
1932	43872	0	0	0	0	0	1	0	0	0	0	0	0	0	0	-0.56	0.2508	17084.8	53624.7	72108	91372	0	0	0	34.9786	46.2175	43.7477
1933	43873	0	0	0	0	0	0	0	0	0	0	0	0	0	0	-0.56	0.2508	18064.9	54677.3	72897.5	92112.3	0	0	0	34.9784	46.2307	42.933
1934	43874	0	0	0	0	0	0	0	0	0	0	0	0	0	0	-0.56	0.2508	19003.2	55735.9	73698.1	92862.3	0	0	0	34.9783	46.2438	42.5523
1935	44099	0	0	0	0	0	1	1	0	0	0	0	0	0	0	0.01	0	47932.6	36007.4	59437.1	73053.7	0	0	0	34.9731	45.4156	9.0643
1936	44100	0	0	0	0	0	1	0	0	0	0	0	0	0	0	0.01	0	46764.2	35143.8	58920	72780.5	0	0	0	34.9731	45.4287	10.2455
1937	44101	0	0	0	0	0	0	0	0	0	0	0	0	0	0	0.01	0	45597.5	34300.6	58423	72526.1	0	0	0	34.973	45.4419	13.8928
1938	44102	0	0	0	0	0	0	1	0	0	0	0	0	0	0	0.01	0	44432.5	33479.1	57946.6	72290.8	0	0	0	34.973	45.455	5.02176
1939	44103	0	0	0	0	0	1	1	0	0	0	0	0	0	0	0.02	0	43268.5	32681	57491.3	72074.7	0	0	0	34.9729	45.4681	22.637
1940	44104	0	0	0	0	0	0	0	0	0	0	0	0	0	0	0.02	0	42104.6	31908.2	57057.6	71878	0	0	0	34.9729	45.4813	13.8554
1941	44105	0	0	0	0	0	1	0	0	0	0	0	0	0	0	0.02	0	40942.9	31162.3	56646	71700.8	0	0	0	34.9728	45.4944	12.7279
1942	44106	0	0	0	0	0	1	0	0	0	0	0	0	0	0	0.02	0	39783.4	30445.5	56257	71543.3	0	0	0	34.9728	45.5076	8.23884
1943	44107	0	0	0	0	1	0	1	0	0	0	0	0	0	0	0.06	0	38626.4	29759.9	55891.1	71405.6	0	0	0	34.9727	45.5207	2.954
1944	44108	0	0	0	0	0	1	0	0	0	0	0	0	0	0	0.12	0	37472.1	29107.6	55548.6	71287.9	0	0	0	34.9727	45.5339	5.83333
1945	44109	0	0	0	0	0	0	0	0	0	0	0	0	0	0	0.12	0	36320.8	28490.9	55230.2	71190.2	0	0	0	34.9726	45.547	3.84041
1946	44110	0	0	0	0	0	1	1	0	0	0	0	0	0	0	0.12	0	35172.7	27912.2	54936.1	71112.6	0	0	0	34.9725	45.5602	3.06242
1947	44111	0	0	0	0	1	0	0	0	0	0	0	0	0	0	0.33	0	34028.2	27373.9	54666.7	71055.2	0	0	0	34.9725	45.5733	1.5722
1948	44112	0	0	0	0	1	1	0	0	0	0	0	0	0	0	0.33	0	32887.7	26878.4	54422.5	71018	0	0	0	34.9724	45.5865	2.0901
1949	44113	0	0	0	0	1	0	1	0	0	0	0	0	0	0	0.33	0	31751.5	26428.2	54203.8	71001.1	0	0	0	34.9724	45.5996	1.12385
1950	44114	0	0	0	0	1	1	0	0	0	0	0	0	0	0	0.33	0	30620.3	26025.6	54010.8	71004.5	0	0	0	34.9723	45.6127	1.06937
1951	44115	0	0	0	0	0	0	0	0	0	0	0	0	0	0	0.56	0.0488	29494.4	25672.7	53843.9	71028.2	0	0	0	34.9722	45.6259	0.207612
1952	44116	0	0	0	0	0	0	1	0	0	0	0	0	0	0	0.56	0.0488	28374.6	25371.8	53703.4	71072.1	0	0	0	34.9722	45.639	1.96007
1953	44117	0	0	0	0	0	1	1	0	0	0	0	0	0	0	0.56	0.0488	27261.7	25124.7	53589.3	71136.2	0	0	0	34.9721	45.6522	3.24624
1954	44118	0	0	0	0	0	0	0	0	0	0	0	0	0	0	0.56	0.0488	26156.5	24932.9	53501.9	71220.5	0	0	0	34.972	45.6653	3.79507
1955	44119	0	0	0	0	1	0	0	0	0	0	0	0	0	0	0.38	0.2158	25059.9	24797.8	53441.3	71324.9	0	0	0	34.9719	45.6785	9.83017
1956	44120	0	0	0	0	1	0	0	0	0	0	0	0	0	0	0.38	0.2158	23963.5	24720.2	53407.6	71449.3	0	0	0	34.9719	45.6916	6.59186
1957	44121	0	0	0	0	1	1	0	0	0	0	0	0	0	0	0.38	0.2158	22866.8	24700.8	53400.8	71593.6	0	0	0	34.9718	45.7048	13.886
1958	44123	0	0	0	0	1	0	0	0	0	0	0	0	0	0	0.21	0.3869	20673.7	24836.5	53468.2	71941.4	0	0	0	34.9716	45.731	29.7298
1959	44124	0	0	0	0	1	0	0	0	0	0	0	0	0	0	0.21	0.3869	19577.8	24990.6	53542.2	72144.6	0	0	0	34.9716	45.7442	21.519
1960	44125	0	0	0	0	1	0	1	0	0	0	0	0	0	0	0.21	0.3869	18480.5	25201	53643	72367.1	0	0	0	34.9715	45.7573	19.1736
1961	44126	0	0	0	0	1	0	0	0	0	0	0	0	0	0	0.21	0.3869	17385.1	25466.3	53770.3	72608.8	0	0	0	34.9714	45.7705	29.465
1962	44128	0	0	0	0	0	1	0	0	0	0	0	0	0	0	0.66	0.3827	15192.4	26154.3	54104.1	73148.9	0	0	0	34.9712	45.7968	23.7603
1963	44129	0	0	0	0	0	0	0	0	0	0	0	0	0	0	0.66	0.3827	14094.3	26573.1	54309.9	73446.9	0	0	0	34.9711	45.8099	4.41816
1964	44130	0	0	0	0	0	0	0	0	0	0	0	0	0	0	0.66	0.3827	13014.2	27038.7	54541.5	73763.1	0	0	0	34.971	45.8231	6.22761
1965	44131	0	0	0	0	1	1	1	1	1	0	1	1	0	0	1.43	0.215	11941.9	27548.7	54798.3	74097.5	0	0	0	34.971	45.8362	7.76533
1966	44134	0	0	0	0	1	0	0	1	1	0	1	1	0	0	1.43	0.215	8811.92	29321.2	55716.9	75206.6	0	0	0	34.9707	45.8756	15.4678
1967	44135	0	0	0	0	1	0	1	1	0	0	1	1	0	0	1.77	0.0463	7769.81	29984.8	56071.1	75610.8	0	0	0	34.9706	45.8888	11.1131
1968	44136	0	0	0	0	1	1	0	1	0	0	1	1	0	0	1.77	0.0463	6723.09	30681.1	56448.6	76031.8	0	0	0	34.9705	45.9019	21.5294
1969	44137	0	0	0	0	1	0	1	1	0	0	1	0	0	0	1.77	0.0463	5682.43	31407.8	56849	76469.3	0	0	0	34.9704	45.9151	10.1658
1970	44138	0	0	0	0	1	1	0	1	0	0	1	0	0	0	1.77	0.0463	4652.96	32162.9	57271.7	76923.1	0	0	0	34.9703	45.9282	4.16227
1971	44139	0	0	0	0	0	0	0	0	0	0	1	0	0	0	1.34	0	3623.53	32944.3	57716.3	77392.8	0	0	0	34.9702	45.9414	27.147
1972	44140	0	0	0	0	0	0	0	0	0	0	1	0	0	0	1.34	0	2580.7	33750.4	58182.2	77878.1	0	0	0	34.9701	45.9545	33.2124
1973	44141	0	0	0	0	0	1	0	0	0	0	1	0	0	0	1.34	0	1581.14	34579.3	58669	78378.8	0	0	0	34.97	45.9676	35.395
1974	44142	0	0	0	0	0	1	0	0	0	0	1	0	0	0	1.34	0	632.456	35427.8	59176.1	78894.6	0	0	0	34.9699	45.9808	32.8301
1975	44143	0	0	0	0	1	0	0	0	0	0	1	0	0	0	0.96	0	282.843	36294.5	59703	79425.2	0	0	0	34.9698	45.9939	28.6424
1976	44144	0	0	0	0	1	0	1	0	0	0	1	0	0	0	0.96	0	1253	37179.7	60249.2	79970.2	0	0	0	34.9697	46.0071	30.0896
1977	44145	0	0	0	0	0	0	0	0	0	0	1	0	0	0	0.96	0.142	2220.36	38082.1	60814.2	80529.5	0	0	0	34.9696	46.0202	33.4484
1978	44146	0	0	0	0	0	1	1	0	0	0	1	0	0	0	0.96	0.142	3190.61	39000.6	61397.5	81102.6	0	0	0	34.9694	46.0334	25.9273
1979	44147	0	0	0	0	1	1	1	0	0	0	0	0	0	0	0.47	0.1462	4186.88	39934.1	61998.5	81689.4	0	0	0	34.9693	46.0465	34.6059
1980	44148	0	0	0	0	1	1	1	0	0	0	0	0	0	0	0.47	0.1462	5099.02	40881.4	62616.7	82289.5	0	0	0	34.9692	46.0596	16.5245
1981	44149	0	0	0	0	1	1	0	0	0	0	0	0	0	0	0.47	0.1462	6010.82	41841.7	63251.6	82902.6	0	0	0	34.9691	46.0728	31.5484
1982	44150	0	0	0	0	1	1	0	0	0	0	0	0	0	0	0.47	0.1462	6888.4	42814.1	63902.8	83528.4	0	0	0	34.969	46.0859	43.5609
1983	44151	0	0	0	0	0	0	1	0	0	0	0	0	0	0	0.06	0.2014	7779.46	43797.8	64569.7	84166.7	0	0	0	34.9689	46.0991	38.963
1984	44152	0	0	0	0	0	0	0	0	0	0	0	0	0	0	0.06	0.2014	8683.32	44792.1	65251.9	84817.2	0	0	0	34.9687	46.1122	34.5709
1985	44153	0	0	0	0	0	1	0	0	0	0	0	0	0	0	0.06	0.2014	9567.13	45796.2	65948.8	85479.6	0	0	0	34.9686	46.1254	10.9269
1986	44154	0	0	0	0	0	0	0	0	0	0	0	0	0	0	0.06	0.2014	10500	46809.5	66660.1	86153.6	0	0	0	34.9685	46.1385	32.3944
1987	44155	0	0	0	0	0	0	0	0	0	0	0	0	0	0	-0.16	0.2394	11482.6	47831.5	67385.2	86838.9	0	0	0	34.9684	46.1516	35.0365
1988	44156	0	0	0	0	0	0	0	0	0	0	0	0	0	0	-0.16	0.2394	12461.9	48861.5	68123.8	87535.4	0	0	0	34.9683	46.1648	33.5634
1989	44157	0	0	0	0	0	1	0	0	0	0	0	0	0	0	-0.16	0.2394	13452.5	49899.2	68875.3	88242.6	0	0	0	34.9681	46.1779	41.3062
1990	44158	0	0	0	0	0	0	0	0	0	0	0	0	0	0	-0.16	0.2394	14426.7	50944	69639.4	88960.4	0	0	0	34.968	46.1911	20.6283
1991	44159	0	0	0	0	0	1	0	0	0	0	0	0	0	0	-0.16	0.2394	15420.1	51995.5	70415.7	89688.6	0	0	0	34.9679	46.2042	17.05
1992	44160	0	0	0	0	0	1	0	0	0	0	0	0	0	0	-0.56	0.2508	16393.3	53053.3	71203.7	90426.8	0	0	0	34.9677	46.2174	14.8677
1993	44161	0	0	0	0	0	0	0	0	0	0	0	0	0	0	-0.56	0.2508	17311.3	54117	72003.1	91174.8	0	0	0	34.9676	46.2305	41.7154
1994	44162	0	0	0	0	0	1	0	0	0	0	0	0	0	0	-0.56	0.2508	18212.4	55186.3	72813.5	91932.4	0	0	0	34.9675	46.2436	23.936
1995	44163	0	0	0	0	0	0	0	0	0	0	0	0	0	0	-0.56	0.2508	19110.7	56260.9	73634.6	92699.3	0	0	0	34.9673	46.2568	42.4588
1996	44387	0	0	0	0	0	0	0	0	0	0	0	0	0	0	0.03	0	48216.2	35195	58361.4	71888	0	0	0	34.9623	45.4155	11.506
1997	44388	0	0	0	0	0	0	0	0	0	0	0	0	0	0	0.03	0	47052.3	34311.1	57834.7	71610.3	0	0	0	34.9623	45.4286	8.98523
1998	44389	0	0	0	0	0	0	1	0	0	0	0	0	0	0	0.03	0	45890.3	33446.8	57328.3	71351.8	0	0	0	34.9622	45.4418	11.6882
[truncated: 3,332 more rows]
